# Supplementary material for: Transcriptome Sequencing to Identify Important Genes and lncRNAs Regulating Abdominal Fat Deposition in Ducks
Source: MDPI journal article supplement (doi:10.3390/ani12101256), 2022-05-13
Supplement: s1 [file s1]

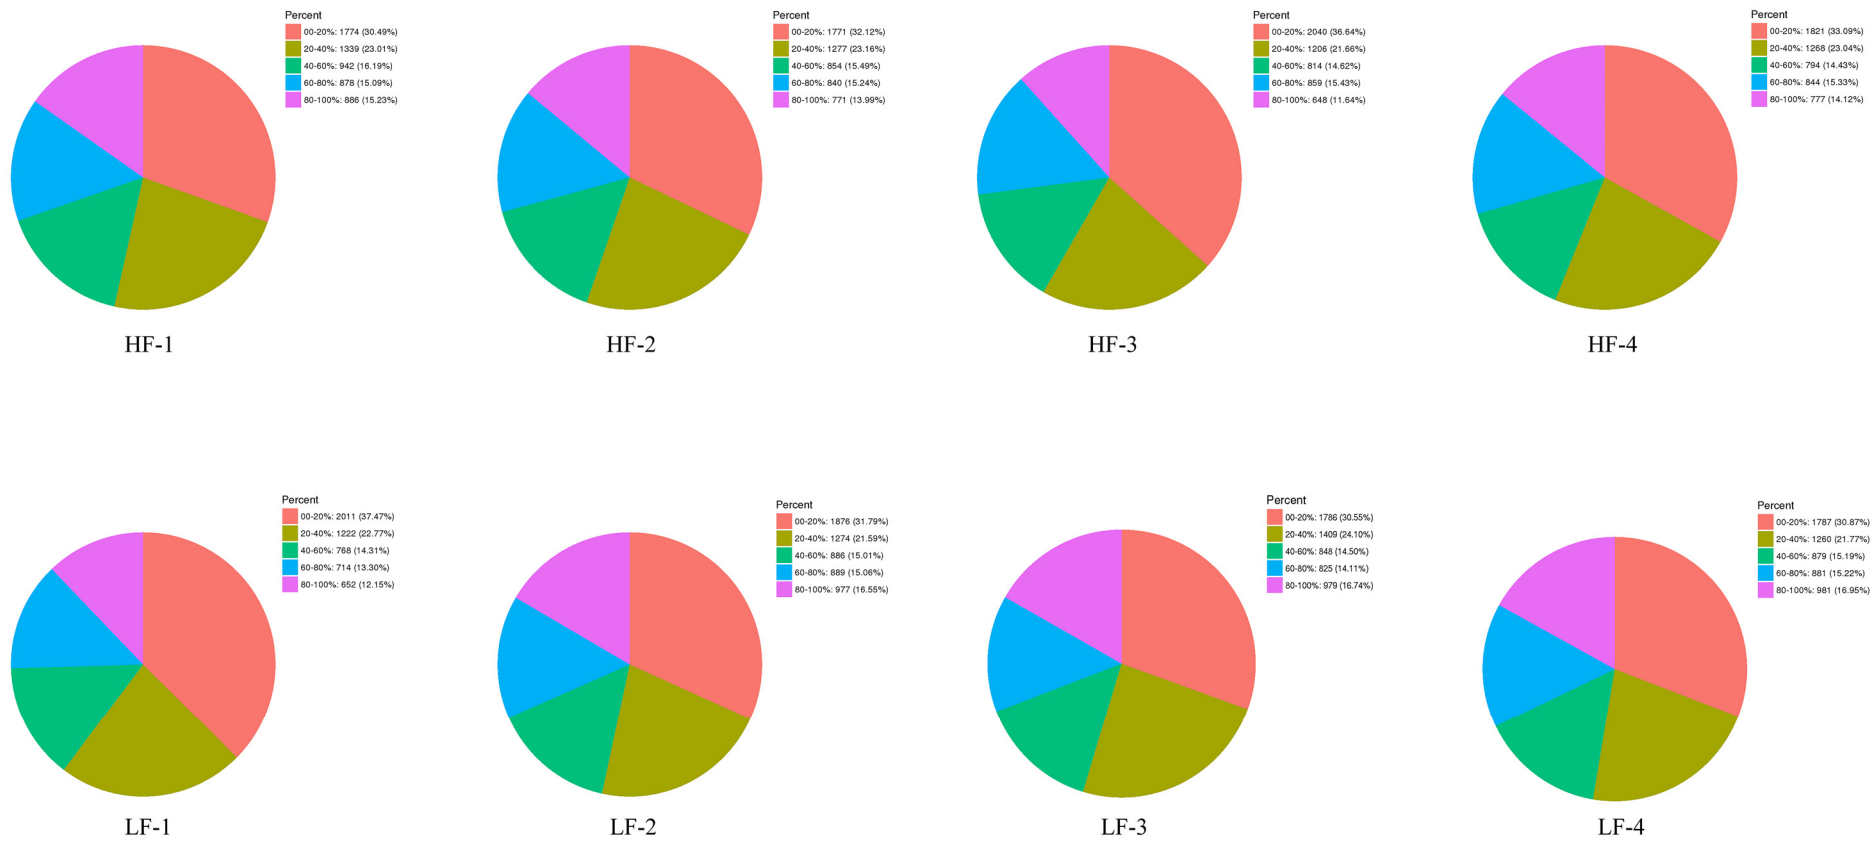

**Figure S1.** lncRNA transcript coverage statistics.

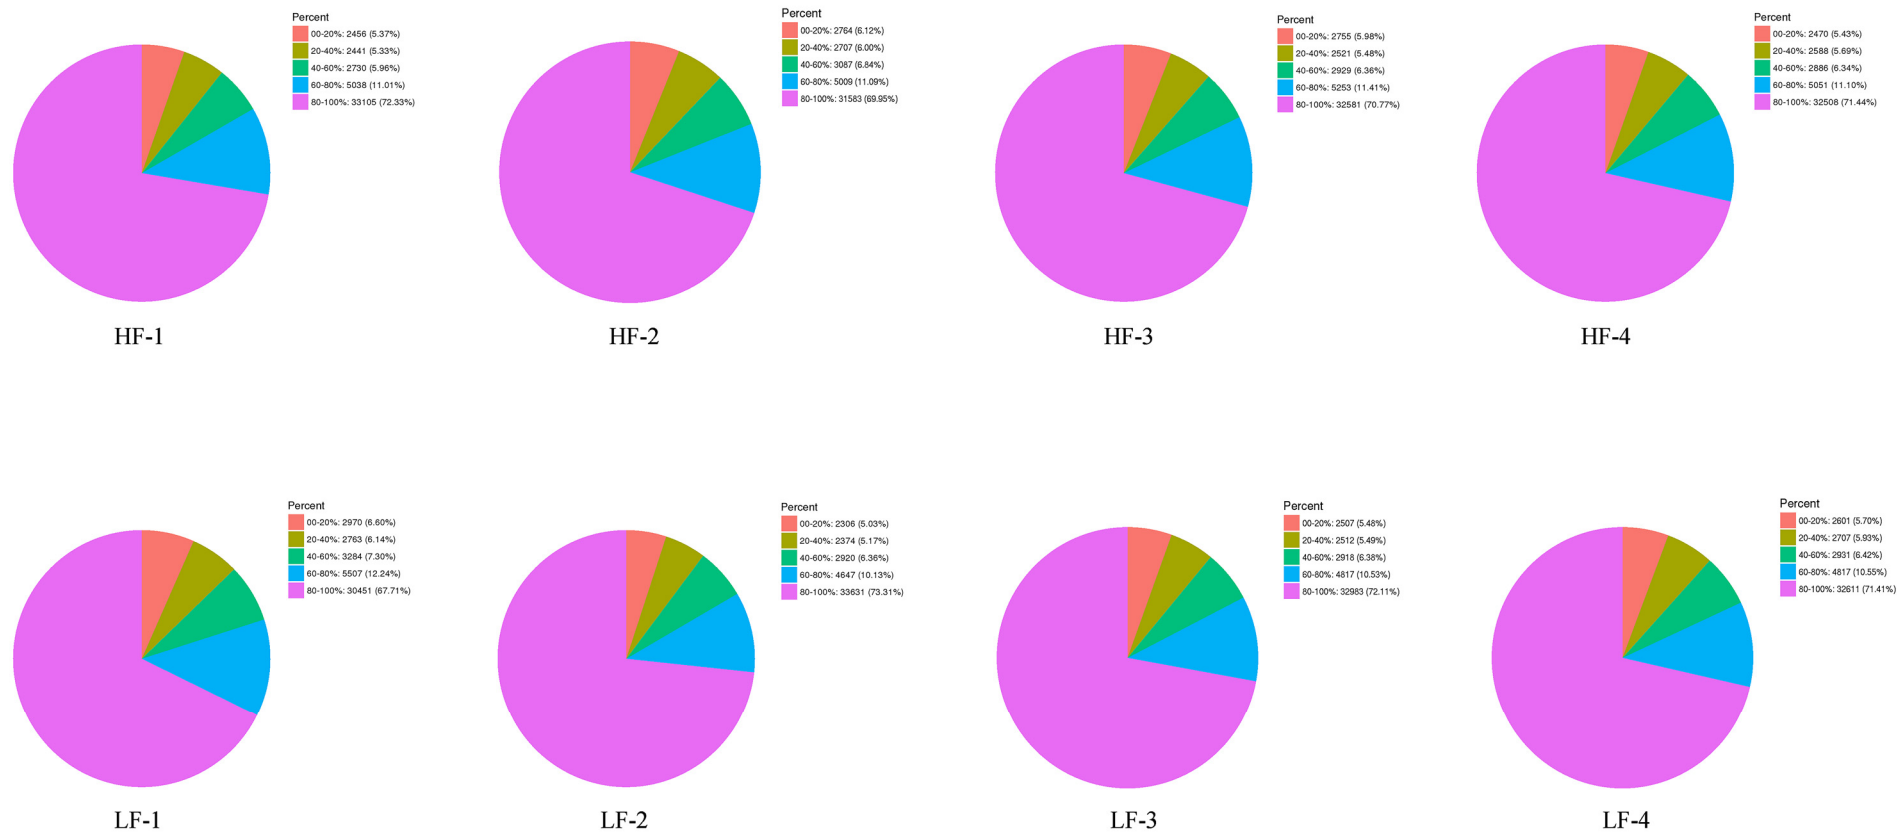

**Figure S2.** mRNA transcript coverage statistics.
