# Supplementary material for: Transcriptome Sequencing to Identify Important Genes and lncRNAs Regulating Abdominal Fat Deposition in Ducks
Source: Animals (Basel). 2022 May 13;12(10):1256. doi: 10.3390/ani12101256 (PMC9138122; doi:10.3390/ani12101256)
Supplement: Supplementary file 1 [file animals-12-01256-s001.zip]

Archive with 9 entries (9 files):
- Supplementary Figures.pdf
- Supplementary Table S1.xls
- Supplementary Table S2.xls
- Supplementary Table S3.xls
- Supplementary Table S4.xls
- Supplementary Table S5.xls
- Supplementary Table S6.xls
- Supplementary Table S7.xls
- Supplementary table S8.xls
