# Supplementary material for: Transcriptome Sequencing to Identify Important Genes and lncRNAs Regulating Abdominal Fat Deposition in Ducks
Source: Animals (Basel). 2022 May 13;12(10):1256. doi: 10.3390/ani12101256 (PMC9138122; doi:10.3390/ani12101256)
Supplement: Supplementary file 1 [file animals-12-01256-s001.zip › Supplementary Table S1.xls]

## Sheet: Differential mRNA statistics.
Table S1. Differential mRNA statistics.
id	HF-1_fpkm	HF-2_fpkm	HF-3_fpkm	HF-4_fpkm	LF-1_fpkm	LF-2_fpkm	LF-3_fpkm	LF-4_fpkm	HF-1_count	HF-2_count	HF-3_count	HF-4_count	LF-1_count	LF-2_count	LF-3_count	LF-4_count	log2(FC)	Pvalue	0p	Symbol	Description	KEGG_A_class	KEGG_B_class	Pathway	K_ID	GO Component	GO Function	GO Process
NM_001310370.1	163.76	126.14	68.45	127.48	51.64	44.34	70.41	32.11	7741	3241	2960	5373	1270	2644	2895	1610	1.29131	0.000566028	0.0600443	LCAT	lecithin-cholesterol acyltransferase precursor [Anas platyrhynchos]	Metabolism;Organismal Systems	Lipid metabolism;Digestive system	ko00564//Glycerophospholipid metabolism;ko04979//Cholesterol metabolism	K00650	GO:0043226//organelle;GO:0005576//extracellular region;GO:0044421//extracellular region part;GO:0032994//protein-lipid complex;GO:0034358//plasma lipoprotein particle;GO:0043227//membrane-bounded organelle;GO:1990777//lipoprotein particle;GO:0031988//membrane-bounded vesicle;GO:0005615//extracellular space;GO:0032991//macromolecular complex;GO:0031982//vesicle	GO:0016740//transferase activity;GO:0016747//transferase activity, transferring acyl groups other than amino-acyl groups;GO:0005488//binding;GO:0003824//catalytic activity;GO:0005515//protein binding;GO:0016746//transferase activity, transferring acyl groups;GO:0034185//apolipoprotein binding	GO:0043933//macromolecular complex subunit organization;GO:0042592//homeostatic process;GO:1902578//single-organism localization;GO:0006066//alcohol metabolic process;GO:0065008//regulation of biological quality;GO:0008152//metabolic process;GO:1901360//organic cyclic compound metabolic process;GO:0006869//lipid transport;GO:1901576//organic substance biosynthetic process;GO:0071827//plasma lipop…
NM_001310798.1	42.42	22.4	27.5	45.95	4.72	23.67	12.55	7.77	7961.56	2285.67	4722.09	7690.91	460.78	5603.52	2049.5	1547.15	1.5052	0.00111717	0.111934	FASN	fatty acid synthase [Anas platyrhynchos]	Environmental Information Processing;Organismal Systems;Metabolism	Signal transduction;Global and overview maps;Lipid metabolism;Endocrine system	ko01100//Metabolic pathways;ko04910//Insulin signaling pathway;ko04152//AMPK signaling pathway;ko01212//Fatty acid metabolism;ko00061//Fatty acid biosynthesis	K00665	GO:0016020//membrane;GO:0031988//membrane-bounded vesicle;GO:0043229//intracellular organelle;GO:0005623//cell;GO:0043227//membrane-bounded organelle;GO:0043226//organelle;GO:0044444//cytoplasmic part;GO:0044464//cell part;GO:0031982//vesicle;GO:0044424//intracellular part;GO:0005737//cytoplasm;GO:0043231//intracellular membrane-bounded organelle;GO:0005622//intracellular	GO:0043169//cation binding;GO:0016740//transferase activity;GO:0036094//small molecule binding;GO:0016491//oxidoreductase activity;GO:1901265//nucleoside phosphate binding;GO:0003723//RNA binding;GO:0019171//3-hydroxyacyl-[acyl-carrier-protein] dehydratase activity;GO:0016788//hydrolase activity, acting on ester bonds;GO:0046914//transition metal ion binding;GO:0003824//catalytic activity;GO:0097…	GO:0006631//fatty acid metabolic process;GO:0034660//ncRNA metabolic process;GO:0044238//primary metabolic process;GO:0044260//cellular macromolecule metabolic process;GO:0070670//response to interleukin-4;GO:0050896//response to stimulus;GO:0006396//RNA processing;GO:0044707//single-multicellular organism process;GO:0043412//macromolecule modification;GO:0006399//tRNA metabolic process;GO:001975…
TCONS_00000535	0.35	0.2	0.27	0.18	0	0	0	0	91.17	28.76	64.97	42.82	0	0	0	0	7.96578	3.06e-05	0.00583617	FRY	XP_005013837.1 PREDICTED: protein furry homolog isoform X6 [Anas platyrhynchos]	-	-	-	-	-	-	-
TCONS_00000668	26.48	29.88	20.76	20.46	38.14	48.5	36.1	81.88	1630.96	1000.62	1169.63	1123.7	1222.31	3768.86	1934.39	5349.7	-1.06829	0.004638	0.0985686	RCBTB1	XP_012950989.1 PREDICTED: RCC1 and BTB domain-containing protein 1 isoform X2 [Anas platyrhynchos]	-	-	-	-	-	-	-
TCONS_00000671	0	0	0	0	0	0.52	0.97	0	0.35	0	0	0	0	64	82.2	0.5	-8.5411	0.00654508	0.137507	CAB39L	EOB04541.1 Calcium-binding protein 39-like, partial [Anas platyrhynchos]	Environmental Information Processing	Signal transduction	ko04150//mTOR signaling pathway;ko04152//AMPK signaling pathway	K08272	-	-	-
TCONS_00001141	64.3	100.3	33.57	49.91	131.68	101.72	156.84	170.58	10748.5	9113.14	5133.25	7438.48	11450.9	21448.8	22801.8	30243.1	-1.17673	0.0014524	0.0162702	MCF2L	XP_013052908.1 PREDICTED: guanine nucleotide exchange factor DBS isoform X4 [Anser cygnoides domesticus]	-	-	-	-	GO:0031252//cell leading edge;GO:0044421//extracellular region part;GO:0005576//extracellular region;GO:0044464//cell part;GO:0005623//cell	GO:0098772//molecular function regulator;GO:0005488//binding;GO:0035091//phosphatidylinositol binding;GO:0043167//ion binding;GO:0005085//guanyl-nucleotide exchange factor activity;GO:0008289//lipid binding;GO:0043168//anion binding;GO:0005088//Ras guanyl-nucleotide exchange factor activity;GO:0005543//phospholipid binding	GO:0019222//regulation of metabolic process;GO:0010556//regulation of macromolecule biosynthetic process;GO:0051171//regulation of nitrogen compound metabolic process;GO:1903506//regulation of nucleic acid-templated transcription;GO:0060255//regulation of macromolecule metabolic process;GO:0010468//regulation of gene expression;GO:0043087//regulation of GTPase activity;GO:0006355//regulation of t…
TCONS_00001492	4.52	2.93	2.32	2.88	9.14	5.36	5.11	12.77	439.22	154.79	206.8	249.48	462.63	657.07	432.45	1316.65	-1.35597	0.00945778	0.0789271	SHROOM2	XP_012951540.1 PREDICTED: protein Shroom2 isoform X1 [Anas platyrhynchos]	-	-	-	-	-	-	-
TCONS_00001918	8.77	7.02	2.62	0	0	0	0	0	1373.88	597.73	376.31	0	0	0	0	0	12.1682	3.29e-09	0.0892777	Rps6ka3	XP_005010903.1 PREDICTED: ribosomal protein S6 kinase alpha-3 isoform X3 [Anas platyrhynchos]	Cellular Processes;Environmental Information Processing;Organismal Systems;Human Diseases	Environmental adaptation;Nervous system;Signal transduction;Endocrine and metabolic diseases;Endocrine system;Cell growth and death	ko04010//MAPK signaling pathway;ko04714//Thermogenesis;ko04150//mTOR signaling pathway;ko04114//Oocyte meiosis;ko04722//Neurotrophin signaling pathway;ko04720//Long-term potentiation;ko04931//Insulin resistance;ko04914//Progesterone-mediated oocyte maturation	K04373	-	GO:0005488//binding;GO:0004866//endopeptidase inhibitor activity;GO:0004672//protein kinase activity;GO:0004869//cysteine-type endopeptidase inhibitor activity;GO:0097367//carbohydrate derivative binding;GO:0032549//ribonucleoside binding;GO:0030234//enzyme regulator activity;GO:0032550//purine ribonucleoside binding;GO:0043167//ion binding;GO:0097159//organic cyclic compound binding;GO:0004857//…	GO:0010033//response to organic substance;GO:0080090//regulation of primary metabolic process;GO:0051707//response to other organism;GO:0080134//regulation of response to stress;GO:0048518//positive regulation of biological process;GO:0009607//response to biotic stimulus;GO:0031323//regulation of cellular metabolic process;GO:0006355//regulation of transcription, DNA-templated;GO:0002237//respons…
TCONS_00003271	0.66	0	0.25	0	0	0	0	0	134.81	0	46.3	0.33	0	0	0	0	7.82972	0.00520148	0.202875	BICD1	XP_019371013.1 PREDICTED: protein bicaudal D homolog 1 isoform X2 [Gavialis gangeticus]	-	-	-	-	-	-	-
TCONS_00003426	0	0	0	0	0	0	3.54	0	0	0	0	0	0	0	325.49	0	-9.78953	0.00789746	0.355918	MYBPC1	XP_015143170.1 PREDICTED: myosin-binding protein C, slow-type isoform X5 [Gallus gallus]	-	-	-	-	-	-	-
TCONS_00003882	0	0	0	0	0	0.19	0.22	0.21	0	0	0	0	0	49.35	39.81	46.43	-7.27612	0.00353062	0.0254712	SCYL2	XP_013038068.1 PREDICTED: SCY1-like protein 2 isoform X1 [Anser cygnoides domesticus]	-	-	-	-	-	GO:0016740//transferase activity;GO:0036094//small molecule binding;GO:0001882//nucleoside binding;GO:0003824//catalytic activity;GO:0005515//protein binding;GO:0097367//carbohydrate derivative binding;GO:0005488//binding;GO:0016301//kinase activity;GO:1901363//heterocyclic compound binding;GO:0001883//purine nucleoside binding;GO:0097159//organic cyclic compound binding;GO:0016772//transferase a…	GO:0046907//intracellular transport;GO:0030100//regulation of endocytosis;GO:0045807//positive regulation of endocytosis;GO:0044765//single-organism transport;GO:0051128//regulation of cellular component organization;GO:0050794//regulation of cellular process;GO:0006897//endocytosis;GO:0051130//positive regulation of cellular component organization;GO:0051234//establishment of localization;GO:005…
TCONS_00004517	1.03	2.35	0	0	0	0	0	0	195.36	242.95	0	0	0	0	0	0	9.72281	0.00050711	0.137741	PLXNB2	XP_005020911.1 PREDICTED: plexin-B2 [Anas platyrhynchos]	Organismal Systems	Development	ko04360//Axon guidance	K06821	GO:0044464//cell part;GO:0016020//membrane;GO:0031224//intrinsic component of membrane;GO:0031982//vesicle;GO:0043227//membrane-bounded organelle;GO:0005623//cell;GO:0031988//membrane-bounded vesicle;GO:0016021//integral component of membrane;GO:0043226//organelle;GO:0044425//membrane part	GO:0060089//molecular transducer activity;GO:0004888//transmembrane signaling receptor activity;GO:0038023//signaling receptor activity;GO:0004871//signal transducer activity;GO:0099600//transmembrane receptor activity;GO:0004872//receptor activity	GO:0061351//neural precursor cell proliferation;GO:0007166//cell surface receptor signaling pathway;GO:0006928//movement of cell or subcellular component;GO:0019222//regulation of metabolic process;GO:0032501//multicellular organismal process;GO:0001764//neuron migration;GO:0007417//central nervous system development;GO:0007399//nervous system development;GO:0044763//single-organism cellular proc…
TCONS_00005031	0	0	0	0	0.87	0	0.53	0.35	0	0	0	0	26.82	0	27.09	21.79	-8.77314	0.00789573	0.0257616	Lcmt2	XP_012964224.1 PREDICTED: tRNA wybutosine-synthesizing protein 4 [Anas platyrhynchos]	-	-	-	-	-	-	-
TCONS_00005457	0	0	0	0	0.07	0.62	0	2.49	0	0	0	0	2.15	43.51	0.07	146.5	-9.63481	0.00362281	0.210787	PSPC1	NP_001026002.1 paraspeckle component 1 [Gallus gallus]	-	-	-	-	GO:0005623//cell;GO:0016604//nuclear body;GO:0043228//non-membrane-bounded organelle;GO:0043227//membrane-bounded organelle;GO:0044422//organelle part;GO:0044446//intracellular organelle part;GO:0043229//intracellular organelle;GO:0043226//organelle;GO:0031974//membrane-enclosed lumen;GO:0044451//nucleoplasm part;GO:0070013//intracellular organelle lumen;GO:0043232//intracellular non-membrane-bou…	GO:0000975//regulatory region DNA binding;GO:0044212//transcription regulatory region DNA binding;GO:0005488//binding;GO:0001067//regulatory region nucleic acid binding;GO:0097159//organic cyclic compound binding;GO:1901363//heterocyclic compound binding;GO:0003677//DNA binding;GO:0003676//nucleic acid binding;GO:0003723//RNA binding	GO:2001141//regulation of RNA biosynthetic process;GO:2000112//regulation of cellular macromolecule biosynthetic process;GO:0050789//regulation of biological process;GO:0019219//regulation of nucleobase-containing compound metabolic process;GO:1903506//regulation of nucleic acid-templated transcription;GO:0051171//regulation of nitrogen compound metabolic process;GO:0050794//regulation of cellula…
TCONS_00006392	11.02	24.27	25.44	13.89	10.03	9.53	7.55	4.34	2687.21	3217.61	5675.93	3020.41	1272.38	2932.37	1602.41	1122.17	1.2465	0.00178439	0.0532023	MXRA5	XP_012947806.1 PREDICTED: matrix-remodeling-associated protein 5 isoform X1 [Anas platyrhynchos]	-	-	-	-	-	-	-
TCONS_00007076	0	1.61	1.91	0	0	0	0	0	0	89.74	179.44	0	0	0	0	0	9.78136	0.00229513	0.168208	GABPA	XP_005011496.1 PREDICTED: GA-binding protein alpha chain isoform X1 [Anas platyrhynchos]	-	-	-	-	GO:0005694//chromosome;GO:0043232//intracellular non-membrane-bounded organelle;GO:0043228//non-membrane-bounded organelle;GO:0044424//intracellular part;GO:0043229//intracellular organelle;GO:0000785//chromatin;GO:0044464//cell part;GO:0043226//organelle;GO:0032991//macromolecular complex;GO:0005623//cell;GO:0044446//intracellular organelle part;GO:0044427//chromosomal part;GO:0044422//organelle…	GO:1901363//heterocyclic compound binding;GO:0043565//sequence-specific DNA binding;GO:0000977//RNA polymerase II regulatory region sequence-specific DNA binding;GO:0001071//nucleic acid binding transcription factor activity;GO:0003700//transcription factor activity, sequence-specific DNA binding;GO:0046983//protein dimerization activity;GO:0000981//RNA polymerase II transcription factor activity…	GO:2000112//regulation of cellular macromolecule biosynthetic process;GO:0006355//regulation of transcription, DNA-templated;GO:0019222//regulation of metabolic process;GO:0051241//negative regulation of multicellular organismal process;GO:0031323//regulation of cellular metabolic process;GO:0080090//regulation of primary metabolic process;GO:0060255//regulation of macromolecule metabolic process…
TCONS_00007498	0	0	4.56	0	0	0	0	0	0.11	0.03	630.2	0	0.07	0.08	0.06	0.01	10.1548	0.00161463	0.355941	PVRL3	XP_012959281.1 PREDICTED: nectin-3 isoform X4 [Anas platyrhynchos]	Cellular Processes;Environmental Information Processing	Signaling molecules and interaction;Cellular community - eukaryotes	ko04514//Cell adhesion molecules (CAMs);ko04520//Adherens junction	K06592	-	-	-
TCONS_00008047	0	0	0	0	0	0.19	0.46	0.92	0	0	0	0	0	83.92	140.28	341.07	-8.61655	3.66e-05	0.0993639	EPHB5	EOB03603.1 Ephrin type-B receptor 5, partial [Anas platyrhynchos]	Organismal Systems	Development	ko04360//Axon guidance	K05111	GO:0044425//membrane part;GO:0016021//integral component of membrane;GO:0031224//intrinsic component of membrane;GO:0016020//membrane	GO:0016773//phosphotransferase activity, alcohol group as acceptor;GO:0004713//protein tyrosine kinase activity;GO:0019199//transmembrane receptor protein kinase activity;GO:0060089//molecular transducer activity;GO:0004872//receptor activity;GO:0032550//purine ribonucleoside binding;GO:0032549//ribonucleoside binding;GO:0099600//transmembrane receptor activity;GO:0005488//binding;GO:0003824//cat…	GO:0048878//chemical homeostasis;GO:0019538//protein metabolic process;GO:0050801//ion homeostasis;GO:0050886//endocrine process;GO:0006793//phosphorus metabolic process;GO:0055080//cation homeostasis;GO:0051234//establishment of localization;GO:0007165//signal transduction;GO:0009987//cellular process;GO:0044237//cellular metabolic process;GO:0051649//establishment of localization in cell;GO:003…
TCONS_00008327	0	0	0	0	0	0	4.94	0	0	0	0	0	0	0	336.36	0	-10.2703	0.00741905	0.355918	CYB5R3	XP_005026359.2 PREDICTED: NADH-cytochrome b5 reductase 3 [Anas platyrhynchos]	Metabolism	Carbohydrate metabolism	ko00520//Amino sugar and nucleotide sugar metabolism	K00326	GO:0043226//organelle;GO:0043229//intracellular organelle;GO:0031090//organelle membrane;GO:0031975//envelope;GO:0044464//cell part;GO:0031988//membrane-bounded vesicle;GO:0005622//intracellular;GO:0031967//organelle envelope;GO:0044422//organelle part;GO:0044446//intracellular organelle part;GO:0043227//membrane-bounded organelle;GO:0043231//intracellular membrane-bounded organelle;GO:0044424//i…	GO:0008378//galactosyltransferase activity;GO:0016757//transferase activity, transferring glycosyl groups;GO:0043168//anion binding;GO:0097159//organic cyclic compound binding;GO:0016758//transferase activity, transferring hexosyl groups;GO:0000166//nucleotide binding;GO:0016740//transferase activity;GO:1901363//heterocyclic compound binding;GO:0035250//UDP-galactosyltransferase activity;GO:19012…	GO:0008152//metabolic process;GO:0061024//membrane organization;GO:0044763//single-organism cellular process;GO:0009987//cellular process;GO:0071840//cellular component organization or biogenesis;GO:0044802//single-organism membrane organization;GO:0044710//single-organism metabolic process;GO:0044699//single-organism process;GO:0016043//cellular component organization
TCONS_00008434	0.16	0.37	0.35	0.2	6.7	5.77	0.18	0.08	25.11	30.88	49.57	26.74	535.77	1119.25	23.65	12.23	-3.55913	0.00209404	0.188058	Acss3	XP_009880968.1 PREDICTED: acyl-CoA synthetase short-chain family member 3, mitochondrial [Charadrius vociferus]	Metabolism	Carbohydrate metabolism;Global and overview maps	ko01100//Metabolic pathways;ko00640//Propanoate metabolism	K01908	GO:0043229//intracellular organelle;GO:0044464//cell part;GO:0044424//intracellular part;GO:0043226//organelle;GO:0005623//cell;GO:0043227//membrane-bounded organelle;GO:0005622//intracellular;GO:0043231//intracellular membrane-bounded organelle	-	-
TCONS_00008489	6.21	4.3	3.3	0	0	0	0	0	1947.7	732.43	945.64	0	0	0	0	0	11.7534	1.52e-10	0.0649262	PDE3A	XP_012952558.1 PREDICTED: cGMP-inhibited 3',5'-cyclic phosphodiesterase A isoform X3 [Anas platyrhynchos]	Environmental Information Processing;Organismal Systems;Metabolism;Human Diseases	Signal transduction;Nucleotide metabolism;Substance dependence;Endocrine system	ko04024//cAMP signaling pathway;ko04022//cGMP - PKG signaling pathway;ko00230//Purine metabolism;ko04924//Renin secretion;ko05032//Morphine addiction	K19021	-	-	-
TCONS_00008929	1.25	0	0	0.64	0	0	0	0	146.31	0	0	66.3	0	0	0	0	8.88417	0.00534154	0.177132	NUAK1	XP_005019748.2 PREDICTED: NUAK family SNF1-like kinase 1, partial [Anas platyrhynchos]	-	-	-	-	GO:0043232//intracellular non-membrane-bounded organelle;GO:0043226//organelle;GO:0044424//intracellular part;GO:0043231//intracellular membrane-bounded organelle;GO:0005856//cytoskeleton;GO:0005622//intracellular;GO:0005623//cell;GO:0043227//membrane-bounded organelle;GO:0043228//non-membrane-bounded organelle;GO:0043229//intracellular organelle;GO:0044464//cell part	GO:0016301//kinase activity;GO:1901363//heterocyclic compound binding;GO:0003824//catalytic activity;GO:0097159//organic cyclic compound binding;GO:0036094//small molecule binding;GO:0005488//binding;GO:0016772//transferase activity, transferring phosphorus-containing groups;GO:0001882//nucleoside binding;GO:0004672//protein kinase activity;GO:0032550//purine ribonucleoside binding;GO:0016773//ph…	GO:0050789//regulation of biological process;GO:0044238//primary metabolic process;GO:0050790//regulation of catalytic activity;GO:0019538//protein metabolic process;GO:0043412//macromolecule modification;GO:0036211//protein modification process;GO:0009987//cellular process;GO:0043666//regulation of phosphoprotein phosphatase activity;GO:0043170//macromolecule metabolic process;GO:0022610//biolog…
TCONS_00009253	0	0	0	0	0	0	1.8	1.47	0	0	0	0	0	0	102.12	101.43	-9.67507	0.00553262	0.133978	TMCC3	EOB06588.1 Transmembrane and coiled-coil domains protein 3, partial [Anas platyrhynchos]	-	-	-	-	-	-	-
TCONS_00009431	0.73	0.56	0	0	0	0	0	0	121.43	50.96	0	0	0	0	0.1	0	8.33316	0.00640514	0.184623	ZC3H7B	XP_012963126.1 PREDICTED: zinc finger CCCH domain-containing protein 7B isoform X2 [Anas platyrhynchos]	-	-	-	-	-	GO:0043167//ion binding;GO:0043169//cation binding;GO:0005488//binding	-
TCONS_00009654	0	0	0	0	0	4.82	0	0	0	0	0	0	0	452.86	0	0	-10.2348	0.00849006	0.355918	MSRB3	XP_012960030.1 PREDICTED: methionine-R-sulfoxide reductase B3 isoform X1 [Anas platyrhynchos]	-	-	-	-	GO:0044424//intracellular part;GO:0043229//intracellular organelle;GO:0043227//membrane-bounded organelle;GO:0044464//cell part;GO:0005623//cell;GO:0043231//intracellular membrane-bounded organelle;GO:0043226//organelle;GO:0005622//intracellular	GO:0005488//binding;GO:0016667//oxidoreductase activity, acting on a sulfur group of donors;GO:0003824//catalytic activity;GO:0046914//transition metal ion binding;GO:0046872//metal ion binding;GO:0043167//ion binding;GO:0016671//oxidoreductase activity, acting on a sulfur group of donors, disulfide as acceptor;GO:0043169//cation binding;GO:0016491//oxidoreductase activity	GO:0043170//macromolecule metabolic process;GO:0050896//response to stimulus;GO:0044699//single-organism process;GO:0008152//metabolic process;GO:0019538//protein metabolic process;GO:0044260//cellular macromolecule metabolic process;GO:0009987//cellular process;GO:0044710//single-organism metabolic process;GO:0071704//organic substance metabolic process;GO:0044267//cellular protein metabolic pro…
TCONS_00009842	35.76	24.58	23.67	33.48	10.11	18.06	13.95	13.35	7977.33	2980.64	4830.56	6659.21	1173.05	5081.23	2705.36	3158.31	1.08276	0.000913309	0.10513	DOCK4	XP_013055208.1 PREDICTED: dedicator of cytokinesis protein 4 isoform X4 [Anser cygnoides domesticus]	Environmental Information Processing	Signal transduction	ko04015//Rap1 signaling pathway	K17697	-	-	-
TCONS_00010017	16.76	15.07	10.31	12.13	21.94	25.44	25.04	45.02	2427.9	1186.6	1366.14	1567.36	1653.61	4650.33	3155.37	6918.84	-1.1137	0.00197175	0.077622	Gramd4	XP_013046213.1 PREDICTED: GRAM domain-containing protein 4 isoform X2 [Anser cygnoides domesticus]	-	-	-	-	-	-	-
TCONS_00010027	1.82	4.13	0.65	0	0	0	0	0	118.15	145.57	38.52	0	0	0	0	0	10.6883	0.000161464	0.0674124	GTSE1	XP_012959278.1 PREDICTED: G2 and S phase-expressed protein 1 isoform X2 [Anas platyrhynchos]	Cellular Processes	Cell growth and death	ko04115//p53 signaling pathway	K10129	-	-	-
TCONS_00010043	12.53	17.1	12.29	10.92	32.12	26.26	15.55	50.5	2275.66	1688.41	2042.67	1769.39	3035.19	6016.65	2457.08	9730.14	-1.23563	0.00133032	0.0908501	KIF21A	XP_015707161.1 PREDICTED: kinesin-like protein KIF21A isoform X8 [Coturnix japonica]	-	-	-	-	-	-	-
TCONS_00012210	0.74	2.07	0	0	0	0	0	0	80.99	122.98	0	0	0	0	0	0	9.45635	0.00356032	0.147371	PHLPP1	XP_005021125.1 PREDICTED: PH domain leucine-rich repeat-containing protein phosphatase 1 [Anas platyrhynchos]	Environmental Information Processing	Signal transduction	ko04151//PI3K-Akt signaling pathway	K16340	-	-	GO:0009605//response to external stimulus;GO:0050896//response to stimulus
TCONS_00014318	0.97	1.25	0	0	0	0	0	0	220.16	154.11	0.15	0	0	0	0	0	9.11634	0.000736084	0.143599	THSD7A	XP_005015166.1 PREDICTED: thrombospondin type-1 domain-containing protein 7A isoform X2 [Anas platyrhynchos]	-	-	-	-	-	-	-
TCONS_00014321	0	0	0.02	1.91	0	0	0	0	0	0	3.49	370.53	0.54	0	0	0	8.91439	0.00547014	0.350994	THSD7A	XP_005015168.1 PREDICTED: thrombospondin type-1 domain-containing protein 7A isoform X4 [Anas platyrhynchos]	-	-	-	-	-	-	-
TCONS_00014657	0	0	0	0	0.92	2.08	0	0	0	0	0	0	79.98	439.24	0	0	-9.55075	0.00101522	0.261971	THRB	XP_014458503.1 PREDICTED: thyroid hormone receptor beta isoform X2 [Alligator mississippiensis]	Environmental Information Processing;Organismal Systems	Signaling molecules and interaction;Endocrine system	ko04080//Neuroactive ligand-receptor interaction;ko04919//Thyroid hormone signaling pathway	K08362	GO:0043231//intracellular membrane-bounded organelle;GO:0043227//membrane-bounded organelle;GO:0005623//cell;GO:0044446//intracellular organelle part;GO:0031988//membrane-bounded vesicle;GO:0044422//organelle part;GO:0000785//chromatin;GO:0031982//vesicle;GO:0043229//intracellular organelle;GO:0044424//intracellular part;GO:0005694//chromosome;GO:0043232//intracellular non-membrane-bounded organe…	GO:0004879//RNA polymerase II transcription factor activity, ligand-activated sequence-specific DNA binding;GO:0003676//nucleic acid binding;GO:0005488//binding;GO:0004871//signal transducer activity;GO:0005515//protein binding;GO:0042562//hormone binding;GO:0046872//metal ion binding;GO:0044877//macromolecular complex binding;GO:0043167//ion binding;GO:0003700//transcription factor activity, seq…	GO:1903506//regulation of nucleic acid-templated transcription;GO:0019219//regulation of nucleobase-containing compound metabolic process;GO:2000112//regulation of cellular macromolecule biosynthetic process;GO:0051171//regulation of nitrogen compound metabolic process;GO:0044700//single organism signaling;GO:0051239//regulation of multicellular organismal process;GO:0035295//tube development;GO:…
TCONS_00015282	2.45	10.87	0.79	0	0	0	0	0	430.42	1038.35	127.55	0	0	0	0	0	11.7844	5.14e-08	0.135378	Clasp2	XP_012950186.1 PREDICTED: CLIP-associating protein 2 isoform X2 [Anas platyrhynchos]	-	-	-	-	-	-	-
TCONS_00015815	0	0	1.32	1.37	0	0	0	0	0	0	179.9	182.65	0	0	0	0	9.39339	0.00131627	0.133993	MOCOS	XP_005024946.1 PREDICTED: molybdenum cofactor sulfurase isoform X1 [Anas platyrhynchos]	Metabolism	Metabolism of cofactors and vitamins	ko00790//Folate biosynthesis	K15631	-	GO:0043169//cation binding;GO:0043167//ion binding;GO:0005488//binding;GO:0003824//catalytic activity;GO:0043168//anion binding;GO:0046872//metal ion binding;GO:0046914//transition metal ion binding	GO:0009108//coenzyme biosynthetic process;GO:0044249//cellular biosynthetic process;GO:0009058//biosynthetic process;GO:0051186//cofactor metabolic process;GO:0051188//cofactor biosynthetic process;GO:0008152//metabolic process;GO:0006732//coenzyme metabolic process;GO:0009987//cellular process;GO:0044237//cellular metabolic process
TCONS_00016009	3.71	2.93	1.96	3.83	4.39	11.52	9.75	20.08	698.39	300.04	337.28	642.63	430.53	2738.96	1598.05	4012.7	-1.87963	8.27e-05	0.0704931	LAMA3	XP_012950585.1 PREDICTED: laminin subunit alpha-3 [Anas platyrhynchos]	Environmental Information Processing;Cellular Processes;Human Diseases;Metabolism	Global and overview maps;Infectious diseases;Cancers;Cellular community - eukaryotes;Signaling molecules and interaction;Signal transduction	ko01100//Metabolic pathways;ko05200//Pathways in cancer;ko05165//Human papillomavirus infection;ko04151//PI3K-Akt signaling pathway;ko04510//Focal adhesion;ko04512//ECM-receptor interaction;ko05145//Toxoplasmosis;ko05222//Small cell lung cancer;ko05146//Amoebiasis	K06240	GO:0044421//extracellular region part;GO:0043234//protein complex;GO:0043227//membrane-bounded organelle;GO:0005578//proteinaceous extracellular matrix;GO:0031988//membrane-bounded vesicle;GO:0031982//vesicle;GO:0044420//extracellular matrix component;GO:0043226//organelle;GO:0005605//basal lamina;GO:0005576//extracellular region;GO:0031012//extracellular matrix;GO:0005604//basement membrane;GO:0…	-	GO:0040011//locomotion;GO:0007155//cell adhesion;GO:0050789//regulation of biological process;GO:0044699//single-organism process;GO:0022610//biological adhesion;GO:0048870//cell motility;GO:0051674//localization of cell;GO:0016477//cell migration;GO:0044767//single-organism developmental process;GO:0032502//developmental process;GO:0050793//regulation of developmental process;GO:0065007//biologi…
TCONS_00016568	1.3	3.15	0	0	0.01	0	0	0	63.02	83	0	0	0.14	0	0	0	8.79766	0.00641311	0.140258	TPD52	XP_013027875.1 PREDICTED: tumor protein D52 isoform X3 [Anser cygnoides domesticus]	-	-	-	-	-	-	-
TCONS_00016587	0	0	0	0	2.96	0.34	0	0.68	0	0	0	0	145.29	40.36	0	67.61	-9.95855	0.000336803	0.0843939	IMPA1	XP_013027863.1 PREDICTED: inositol monophosphatase 1 isoform X1 [Anser cygnoides domesticus]	Environmental Information Processing;Metabolism	Global and overview maps;Carbohydrate metabolism;Signal transduction	ko01100//Metabolic pathways;ko04070//Phosphatidylinositol signaling system;ko00562//Inositol phosphate metabolism	K01092	GO:0044424//intracellular part;GO:0044464//cell part;GO:0031982//vesicle;GO:0043226//organelle;GO:0005623//cell;GO:0031988//membrane-bounded vesicle;GO:0043227//membrane-bounded organelle;GO:0005622//intracellular	GO:0043169//cation binding;GO:0043167//ion binding;GO:0005515//protein binding;GO:0046872//metal ion binding;GO:0005488//binding;GO:0003824//catalytic activity;GO:0046914//transition metal ion binding;GO:0052834//inositol monophosphate phosphatase activity;GO:0016788//hydrolase activity, acting on ester bonds;GO:0052745//inositol phosphate phosphatase activity;GO:0016787//hydrolase activity;GO:00…	GO:0019637//organophosphate metabolic process;GO:0009058//biosynthetic process;GO:0006796//phosphate-containing compound metabolic process;GO:0046486//glycerolipid metabolic process;GO:0045017//glycerolipid biosynthetic process;GO:0050794//regulation of cellular process;GO:0009987//cellular process;GO:0044255//cellular lipid metabolic process;GO:0006793//phosphorus metabolic process;GO:0044238//p…
TCONS_00016891	0	0	5.31	0	0	0	0	0	0	0	569.66	0	0	0	0	0	10.3745	0.0031704	0.355918	TAF2	XP_012959174.1 PREDICTED: transcription initiation factor TFIID subunit 2 isoform X2 [Anas platyrhynchos]	Genetic Information Processing	Transcription	ko03022//Basal transcription factors	K03128	-	-	-
TCONS_00017048	0	0	0	0.54	6.37	1.24	1.29	1.57	0	0	0	52.46	361.71	170.74	122.51	181.53	-4.27716	0.00974592	0.0110304	PTK2	EOA99770.1 Focal adhesion kinase 1, partial [Anas platyrhynchos]	Cellular Processes;Environmental Information Processing;Human Diseases;Organismal Systems	Signal transduction;Development;Cancers;Immune system;Cellular community - eukaryotes;Cell motility;Drug resistance;Cardiovascular diseases;Infectious diseases	ko05200//Pathways in cancer;ko05165//Human papillomavirus infection;ko04151//PI3K-Akt signaling pathway;ko05205//Proteoglycans in cancer;ko04810//Regulation of actin cytoskeleton;ko04510//Focal adhesion;ko04360//Axon guidance;ko05202//Transcriptional misregulation in cancers;ko05163//Human cytomegalovirus infection;ko04062//Chemokine signaling pathway;ko05418//Fluid shear stress and atheroscleros…	K05725	GO:0032432//actin filament bundle;GO:0044464//cell part;GO:0044424//intracellular part;GO:0005886//plasma membrane;GO:0044430//cytoskeletal part;GO:0043226//organelle;GO:0043227//membrane-bounded organelle;GO:0043229//intracellular organelle;GO:0030055//cell-substrate junction;GO:0005856//cytoskeleton;GO:0030054//cell junction;GO:0044444//cytoplasmic part;GO:0005924//cell-substrate adherens junct…	GO:0036094//small molecule binding;GO:0008092//cytoskeletal protein binding;GO:0032549//ribonucleoside binding;GO:0003824//catalytic activity;GO:0001882//nucleoside binding;GO:0016773//phosphotransferase activity, alcohol group as acceptor;GO:0004672//protein kinase activity;GO:0001883//purine nucleoside binding;GO:0060089//molecular transducer activity;GO:0019900//kinase binding;GO:0019901//prot…	GO:0042787//protein ubiquitination involved in ubiquitin-dependent protein catabolic process;GO:0010721//negative regulation of cell development;GO:0019941//modification-dependent protein catabolic process;GO:0009893//positive regulation of metabolic process;GO:0050896//response to stimulus;GO:0007166//cell surface receptor signaling pathway;GO:0007399//nervous system development;GO:0048858//cell…
TCONS_00017212	17.9	17.43	32.43	13.74	12.66	10.36	8.73	6.31	4690.78	2483.17	7775.29	3212.22	1726.22	3424.71	1989.72	1755.06	1.09852	0.0032314	0.110944	PLEC	XP_010565091.1 PREDICTED: plectin-like isoform X1 [Haliaeetus leucocephalus]	-	-	-	-	GO:0030016//myofibril;GO:0005622//intracellular;GO:0044464//cell part;GO:0044424//intracellular part;GO:0031982//vesicle;GO:0030054//cell junction;GO:0005924//cell-substrate adherens junction;GO:0043229//intracellular organelle;GO:0030055//cell-substrate junction;GO:0005856//cytoskeleton;GO:0005886//plasma membrane;GO:0043227//membrane-bounded organelle;GO:0005912//adherens junction;GO:0016020//m…	GO:0097159//organic cyclic compound binding;GO:0003723//RNA binding;GO:0005198//structural molecule activity;GO:0003676//nucleic acid binding;GO:0008092//cytoskeletal protein binding;GO:1901363//heterocyclic compound binding;GO:0005515//protein binding;GO:0005488//binding	GO:0009987//cellular process;GO:0008219//cell death;GO:0044699//single-organism process;GO:0016043//cellular component organization;GO:0044085//cellular component biogenesis;GO:0016265//death;GO:0044763//single-organism cellular process;GO:0034329//cell junction assembly;GO:0043062//extracellular structure organization;GO:0034330//cell junction organization;GO:0022411//cellular component disassem…
TCONS_00017402	1.53	0	0	0.86	0	0	0	0	200.83	0	0	100.35	0	0	0	0	9.22279	0.00248687	0.168284	GZF1	XP_012954277.1 PREDICTED: GDNF-inducible zinc finger protein 1 isoform X1 [Anas platyrhynchos]	-	-	-	-	-	-	-
TCONS_00017591	0.77	0.51	0.4	1.13	3.97	4.26	4.37	5.12	59.04	21.04	28.19	76.51	157.52	409.85	289.86	413.8	-2.65674	0.000580143	0.00468539	PROKR1	XP_009632965.1 PREDICTED: prokineticin receptor 2 [Egretta garzetta]	-	-	-	-	GO:0044425//membrane part;GO:0031224//intrinsic component of membrane;GO:0016020//membrane	GO:0004872//receptor activity;GO:0004888//transmembrane signaling receptor activity;GO:0060089//molecular transducer activity;GO:0004871//signal transducer activity;GO:0038023//signaling receptor activity;GO:0099600//transmembrane receptor activity	GO:0007154//cell communication;GO:0050794//regulation of cellular process;GO:0023052//signaling;GO:0007186//G-protein coupled receptor signaling pathway;GO:0007165//signal transduction;GO:0050789//regulation of biological process;GO:0044699//single-organism process;GO:0051716//cellular response to stimulus;GO:0044700//single organism signaling;GO:0044763//single-organism cellular process;GO:00508…
TCONS_00018023	0	0	0	0	0	0	0.05	3.2	0	0	0	0	0	0	3.26	273.27	-9.66622	0.00640462	0.348876	VASH2	XP_013029491.1 PREDICTED: vasohibin-2 isoform X1 [Anser cygnoides domesticus]	-	-	-	-	-	-	-
TCONS_00018331	18.63	18.33	46	18.41	18.2	5.19	3.15	9.24	1368.61	732.07	3092	1205.75	695.84	481.48	201.48	719.79	1.50241	0.00610332	0.088557	SOD3	PREDICTED: extracellular superoxide dismutase [Cu-Zn] isoform X1 [Anas platyrhynchos]	Cellular Processes;Genetic Information Processing;Human Diseases	Cell growth and death;Folding, sorting and degradation;Neurodegenerative diseases	ko05010//Alzheimer disease;ko04217//Necroptosis;ko04218//Cellular senescence;ko04210//Apoptosis;ko04141//Protein processing in endoplasmic reticulum	K01367	GO:0043226//organelle;GO:0005576//extracellular region;GO:0044422//organelle part;GO:0044424//intracellular part;GO:0031984//organelle subcompartment;GO:0043227//membrane-bounded organelle;GO:0005622//intracellular;GO:0044464//cell part;GO:0031988//membrane-bounded vesicle;GO:0005623//cell;GO:0043229//intracellular organelle;GO:0031982//vesicle;GO:0044446//intracellular organelle part;GO:0044421/…	GO:0043169//cation binding;GO:0005488//binding;GO:0046872//metal ion binding;GO:0043167//ion binding;GO:0046914//transition metal ion binding;GO:0016209//antioxidant activity;GO:0003824//catalytic activity	GO:0001085//RNA polymerase II transcription factor binding;GO:0051427//hormone receptor binding;GO:1901363//heterocyclic compound binding;GO:0005515//protein binding;GO:0044212//transcription regulatory region DNA binding;GO:0000975//regulatory region DNA binding;GO:0003677//DNA binding;GO:0000976//transcription regulatory region sequence-specific DNA binding;GO:0019899//enzyme binding;GO:0001067…
TCONS_00018340	0	0	0	0	0	7.58	0	0	0	0	0	0	0	425.73	0	0	-10.888	0.00944118	0.355918	Slc29a1	XP_005015852.1 PREDICTED: LOW QUALITY PROTEIN: equilibrative nucleoside transporter 1 [Anas platyrhynchos]	Human Diseases	Substance dependence	ko05034//Alcoholism	K15014	GO:0005623//cell;GO:0044464//cell part;GO:0016021//integral component of membrane;GO:0005886//plasma membrane;GO:0071944//cell periphery;GO:0031224//intrinsic component of membrane;GO:0044425//membrane part;GO:0016020//membrane	-	GO:0051179//localization;GO:1902578//single-organism localization;GO:0071702//organic substance transport;GO:0051234//establishment of localization;GO:0044699//single-organism process;GO:0015931//nucleobase-containing compound transport;GO:0044765//single-organism transport;GO:0006810//transport;GO:0071705//nitrogen compound transport;GO:0015858//nucleoside transport;GO:1901264//carbohydrate deri…
TCONS_00018608	5.36	2.86	3.16	0.92	4.64	9.43	8.06	9.83	758.28	220.38	409.49	116.35	341.56	1683.51	992.23	1475.84	-1.37761	0.00914776	0.0640701	THBS2	XP_012955679.1 PREDICTED: thrombospondin-2 isoform X3 [Anas platyrhynchos]	Environmental Information Processing;Cellular Processes;Human Diseases	Cellular community - eukaryotes;Signaling molecules and interaction;Signal transduction;Infectious diseases;Transport and catabolism	ko05165//Human papillomavirus infection;ko04151//PI3K-Akt signaling pathway;ko04510//Focal adhesion;ko04512//ECM-receptor interaction;ko04145//Phagosome;ko05144//Malaria	K04659	GO:0005622//intracellular;GO:0031012//extracellular matrix;GO:0031988//membrane-bounded vesicle;GO:0012505//endomembrane system;GO:0044444//cytoplasmic part;GO:0005623//cell;GO:0044464//cell part;GO:0043231//intracellular membrane-bounded organelle;GO:0016023//cytoplasmic, membrane-bounded vesicle;GO:0043227//membrane-bounded organelle;GO:0031982//vesicle;GO:0031410//cytoplasmic vesicle;GO:004442…	GO:0005539//glycosaminoglycan binding;GO:0005488//binding;GO:0097367//carbohydrate derivative binding	GO:0050789//regulation of biological process;GO:2000026//regulation of multicellular organismal development;GO:0022603//regulation of anatomical structure morphogenesis;GO:0050793//regulation of developmental process;GO:0045765//regulation of angiogenesis;GO:1901342//regulation of vasculature development;GO:0051239//regulation of multicellular organismal process;GO:0065007//biological regulation;…
TCONS_00019138	1.35	2.57	1.35	1.54	4.19	3.71	6.43	4.91	201.88	209.85	185.32	205.5	326.79	701.93	839.05	780.91	-1.49838	0.00390955	0.00712221	PTPRK	XP_015714004.1 PREDICTED: receptor-type tyrosine-protein phosphatase kappa isoform X10 [Coturnix japonica]	-	-	-	-	-	-	-
TCONS_00019502	0	0	0	0	2.58	0.65	0.29	0.66	0	0	0	0	203.66	124.28	38.71	105.28	-10.0293	2.16e-07	0.0132089	GPR63	XP_005021425.1 PREDICTED: probable G-protein coupled receptor 63 [Anas platyrhynchos]	-	-	-	-	GO:0043234//protein complex;GO:0016020//membrane;GO:0031224//intrinsic component of membrane;GO:0032991//macromolecular complex;GO:0044425//membrane part	-	GO:0044763//single-organism cellular process;GO:0051716//cellular response to stimulus;GO:0009987//cellular process;GO:0007165//signal transduction;GO:0050896//response to stimulus;GO:0050789//regulation of biological process;GO:0065007//biological regulation;GO:0023052//signaling;GO:0007154//cell communication;GO:0007166//cell surface receptor signaling pathway;GO:0044700//single organism signal…
TCONS_00020026	3.18	0	0	0	0	0	0	0	483.77	0.06	0.06	0.2	0.19	0	0.16	0.02	9.63481	0.00228444	0.355865	gdf6a	XP_014812238.1 PREDICTED: growth/differentiation factor 7-like [Calidris pugnax]	Environmental Information Processing	Signal transduction;Signaling molecules and interaction	ko04390//Hippo signaling pathway;ko04060//Cytokine-cytokine receptor interaction;ko04350//TGF-beta signaling pathway	K04664	-	-	-
TCONS_00020208	0.48	0	0	0.26	0	0	0	0	122.64	0	0	58.51	0	0	0	0	7.53138	0.00732317	0.172404	KIF13B	XP_013039948.1 PREDICTED: kinesin-like protein KIF13B isoform X3 [Anser cygnoides domesticus]	-	-	-	-	-	-	-
TCONS_00020997	0	0	0	0	0.79	0.33	0.68	0.79	0	0	0	0	110.61	113.21	158.44	226.11	-9.33874	8.71e-09	0.00134098	Ttbk1	EOB03089.1 Tau-tubulin kinase 1, partial [Anas platyrhynchos]	-	-	-	-	-	GO:0097159//organic cyclic compound binding;GO:0016301//kinase activity;GO:0016772//transferase activity, transferring phosphorus-containing groups;GO:0001883//purine nucleoside binding;GO:0032550//purine ribonucleoside binding;GO:1901363//heterocyclic compound binding;GO:0005488//binding;GO:0016740//transferase activity;GO:0036094//small molecule binding;GO:0097367//carbohydrate derivative bindi…	GO:0019538//protein metabolic process;GO:0036211//protein modification process;GO:0043170//macromolecule metabolic process;GO:0048856//anatomical structure development;GO:0043412//macromolecule modification;GO:0009987//cellular process;GO:0008152//metabolic process;GO:0044260//cellular macromolecule metabolic process;GO:0044238//primary metabolic process;GO:0071704//organic substance metabolic pr…
TCONS_00021691	0	0	0	0	0	0.74	0	0.32	0	0	0	0	0	174.85	0	64.03	-8.04985	0.00655289	0.197726	UBR2	XP_005015360.2 PREDICTED: E3 ubiquitin-protein ligase UBR2 [Anas platyrhynchos]	-	-	-	-	GO:0032991//macromolecular complex;GO:0044464//cell part;GO:0005622//intracellular;GO:0043226//organelle;GO:0043229//intracellular organelle;GO:0005623//cell;GO:0044424//intracellular part;GO:0043231//intracellular membrane-bounded organelle;GO:0043227//membrane-bounded organelle;GO:0016020//membrane	GO:0046872//metal ion binding;GO:0005488//binding;GO:0019787//ubiquitin-like protein transferase activity;GO:0043168//anion binding;GO:0043169//cation binding;GO:0016740//transferase activity;GO:0043167//ion binding;GO:0031406//carboxylic acid binding;GO:0036094//small molecule binding;GO:0046914//transition metal ion binding;GO:0043177//organic acid binding;GO:0016597//amino acid binding;GO:0003…	GO:0071229//cellular response to acid chemical;GO:0051276//chromosome organization;GO:1901700//response to oxygen-containing compound;GO:0070887//cellular response to chemical stimulus;GO:0001101//response to acid chemical;GO:0071704//organic substance metabolic process;GO:0010243//response to organonitrogen compound;GO:1901698//response to nitrogen compound;GO:1901701//cellular response to oxyge…
TCONS_00021760	24.07	36.67	40.72	48.59	16.31	21.09	16.86	16.94	1205.86	998.44	1866.08	2170.21	425.17	1332.78	734.79	900.31	1.07549	0.00452871	0.0768478	fam89a	XP_010208400.1 PREDICTED: LOW QUALITY PROTEIN: protein FAM89A-like, partial [Colius striatus]	-	-	-	-	-	-	-
TCONS_00021817	0	0	0	0	5	0	0.18	0.83	0	0.01	0	0	484.75	0	29.25	163.45	-10.5531	6.07e-06	0.177875	MLLT4	XP_010705358.1 PREDICTED: afadin isoform X8 [Meleagris gallopavo]	Cellular Processes;Environmental Information Processing;Organismal Systems	Immune system;Signal transduction;Cellular community - eukaryotes	ko04024//cAMP signaling pathway;ko04014//Ras signaling pathway;ko04015//Rap1 signaling pathway;ko04530//Tight junction;ko04520//Adherens junction;ko04670//Leukocyte transendothelial migration	K05702	GO:0005622//intracellular;GO:0070161//anchoring junction;GO:0005623//cell;GO:0016020//membrane;GO:0030054//cell junction;GO:0005911//cell-cell junction;GO:0044464//cell part;GO:0044424//intracellular part	GO:0005488//binding;GO:0005515//protein binding	GO:0050794//regulation of cellular process;GO:0065007//biological regulation;GO:0050789//regulation of biological process
TCONS_00022137	0.04	0.01	0.01	24.88	0.04	0.02	0.02	0.01	2.16	0.37	0.5	1273.87	1.13	1.61	1.13	0.56	8.11432	0.000276965	0.356055	AKAP7	KFP91281.1 A-kinase anchor protein 7 isoforms alpha and beta, partial [Apaloderma vittatum]	-	-	-	-	-	-	-
TCONS_00022293	0.03	0.25	0.69	0	0	0	0	0	4.59	23.45	108.47	0	0	0	0	0.08	7.92184	0.00424406	0.226202	DSE	XP_012960237.1 PREDICTED: dermatan-sulfate epimerase isoform X2 [Anas platyrhynchos]	Metabolism	Glycan biosynthesis and metabolism;Global and overview maps	ko01100//Metabolic pathways;ko00532//Glycosaminoglycan biosynthesis - chondroitin sulfate / dermatan sulfate	K01794	GO:0005623//cell;GO:0005622//intracellular;GO:0043229//intracellular organelle;GO:0043226//organelle;GO:0044464//cell part;GO:0043231//intracellular membrane-bounded organelle;GO:0043227//membrane-bounded organelle;GO:0044424//intracellular part	GO:0016854//racemase and epimerase activity;GO:0016857//racemase and epimerase activity, acting on carbohydrates and derivatives;GO:0003824//catalytic activity;GO:0016853//isomerase activity	GO:0006022//aminoglycan metabolic process;GO:1901576//organic substance biosynthetic process;GO:0030203//glycosaminoglycan metabolic process;GO:1901135//carbohydrate derivative metabolic process;GO:0044711//single-organism biosynthetic process;GO:0009058//biosynthetic process;GO:0009059//macromolecule biosynthetic process;GO:0071704//organic substance metabolic process;GO:1901564//organonitrogen …
TCONS_00022295	0	0	0	0	0	1	1.39	0	0	0	0	0	0	216.18	208.14	0	-9.22279	0.00118974	0.13409	DSE	XP_012960237.1 PREDICTED: dermatan-sulfate epimerase isoform X2 [Anas platyrhynchos]	Metabolism	Glycan biosynthesis and metabolism;Global and overview maps	ko01100//Metabolic pathways;ko00532//Glycosaminoglycan biosynthesis - chondroitin sulfate / dermatan sulfate	K01794	GO:0043226//organelle;GO:0043229//intracellular organelle;GO:0005623//cell;GO:0005622//intracellular;GO:0043227//membrane-bounded organelle;GO:0044464//cell part;GO:0043231//intracellular membrane-bounded organelle;GO:0044424//intracellular part	GO:0016857//racemase and epimerase activity, acting on carbohydrates and derivatives;GO:0016853//isomerase activity;GO:0003824//catalytic activity;GO:0016854//racemase and epimerase activity	GO:0006022//aminoglycan metabolic process;GO:0009059//macromolecule biosynthetic process;GO:0043170//macromolecule metabolic process;GO:0030203//glycosaminoglycan metabolic process;GO:0006807//nitrogen compound metabolic process;GO:0044710//single-organism metabolic process;GO:1901566//organonitrogen compound biosynthetic process;GO:0008152//metabolic process;GO:1901576//organic substance biosynt…
TCONS_00023094	0	0.26	0.45	0.18	0	0	0	0	0	32.1	91.59	36.31	0	0	0	0	7.79766	0.00163161	0.0800433	SLC7A6	PREDICTED: Y+L amino acid transporter 2 isoform X1 [Anas platyrhynchos]	-	-	-	-	GO:0031224//intrinsic component of membrane;GO:0016020//membrane;GO:0044425//membrane part	GO:0022891//substrate-specific transmembrane transporter activity;GO:0005342//organic acid transmembrane transporter activity;GO:0046943//carboxylic acid transmembrane transporter activity;GO:0005215//transporter activity;GO:0022857//transmembrane transporter activity;GO:0022892//substrate-specific transporter activity;GO:0008514//organic anion transmembrane transporter activity;GO:0015075//ion t…	-
TCONS_00023195	0	0	0	0	3.75	0	0	0	0	0	0	0	372.93	0	0	0	-9.87267	0.00319394	0.355918	RCAN2	XP_005030476.1 PREDICTED: calcipressin-2 isoform X1 [Anas platyrhynchos]	Organismal Systems	Endocrine system	ko04919//Thyroid hormone signaling pathway	K17903	-	-	GO:0050896//response to stimulus;GO:0051716//cellular response to stimulus;GO:0023052//signaling;GO:0044708//single-organism behavior;GO:0050794//regulation of cellular process;GO:0007613//memory;GO:0050789//regulation of biological process;GO:0019722//calcium-mediated signaling;GO:0065007//biological regulation;GO:0032501//multicellular organismal process;GO:0044763//single-organism cellular pro…
TCONS_00023642	7.26	6	1.8	5.91	0.58	1.5	0.64	0.95	713.08	320.6	161.79	518.11	29.61	185.94	55.01	99	2.51447	0.000410403	0.0356048	MANBA	XP_012953147.1 PREDICTED: beta-mannosidase [Anas platyrhynchos]	Metabolism;Cellular Processes	Glycan biosynthesis and metabolism;Transport and catabolism	ko04142//Lysosome;ko00511//Other glycan degradation	K01192	-	-	-
TCONS_00025014	8.26	0	0	0	0	0	0	0	548.64	0	0	0	0	0	0	0	11.0119	0.00406364	0.355918	SCFD2	XP_013028218.1 PREDICTED: sec1 family domain-containing protein 2 [Anser cygnoides domesticus]	-	-	-	-	-	-	-
TCONS_00025520	0	0	0	0	0	0.07	0.07	0.15	0	0	0	0	0	25.95	19.48	50.84	-6.17991	0.00781794	0.0615862	-	EOB03809.1 hypothetical protein Anapl_00044 [Anas platyrhynchos]	-	-	-	-	-	-	-
TCONS_00025768	23.74	24.94	24.28	36.39	13.56	18.56	12.13	9.96	4679.94	2672.67	4378.2	6395.17	1390.85	4614.92	2080.3	2083.32	1.01232	0.002557	0.104757	Ank2	XP_012954008.1 PREDICTED: ankyrin-2 isoform X4 [Anas platyrhynchos]	Human Diseases;Organismal Systems	Immune system;Cancers	ko05205//Proteoglycans in cancer;ko04624//Toll and Imd signaling pathway	K10380	-	-	-
TCONS_00026058	9.95	10.36	9.3	7.65	3.01	2.72	1.7	2.23	426.02	241	364	292.01	66.94	147.03	63.2	101.04	1.94753	0.00351297	0.00191749	CETN1	EOB06902.1 Centrin-1, partial [Anas platyrhynchos]	Genetic Information Processing	Replication and repair	ko03420//Nucleotide excision repair	K10840	GO:0043228//non-membrane-bounded organelle;GO:0044430//cytoskeletal part;GO:0043226//organelle;GO:0044446//intracellular organelle part;GO:0005815//microtubule organizing center;GO:0005856//cytoskeleton;GO:0044424//intracellular part;GO:0031513//nonmotile primary cilium;GO:0043229//intracellular organelle;GO:0044464//cell part;GO:0044422//organelle part;GO:0072372//primary cilium;GO:0005929//cili…	GO:0032403//protein complex binding;GO:0044877//macromolecular complex binding;GO:0005515//protein binding;GO:0008092//cytoskeletal protein binding;GO:0043169//cation binding;GO:0005488//binding;GO:0015631//tubulin binding;GO:0046872//metal ion binding;GO:0043167//ion binding	GO:0050896//response to stimulus;GO:0009266//response to temperature stimulus;GO:0009628//response to abiotic stimulus;GO:0009408//response to heat;GO:0006950//response to stress
TCONS_00026134	104.68	59.13	80.15	48.05	100.78	146.68	176.79	187.13	7585.47	2328.93	5313.05	3104.65	3799.51	13408.8	11142.8	14383.1	-1.06605	0.00241867	0.0623635	IGFBP7	XP_005028955.1 PREDICTED: insulin-like growth factor-binding protein 7, partial [Anas platyrhynchos]	-	-	-	-	GO:0043227//membrane-bounded organelle;GO:0005576//extracellular region;GO:0031982//vesicle;GO:0043226//organelle;GO:0031988//membrane-bounded vesicle;GO:0044421//extracellular region part	GO:0005515//protein binding;GO:0005488//binding;GO:0019838//growth factor binding	GO:0007275//multicellular organism development;GO:0007423//sensory organ development;GO:0044707//single-multicellular organism process;GO:0044699//single-organism process;GO:0032501//multicellular organismal process;GO:0048856//anatomical structure development;GO:0022610//biological adhesion;GO:0032502//developmental process;GO:0048731//system development;GO:0048513//animal organ development;GO:0…
TCONS_00026636	1.48	3.17	1	3.51	21.16	23.36	23.46	119.36	81	94	50	171	601	1609	1114	6912	-4.35417	1.86e-10	0.14429	APELA	KFM02886.1 hypothetical protein AS27_01381, partial [Aptenodytes forsteri]	-	-	-	-	-	-	-
TCONS_00026714	0	0	0	0	0	0.39	0.52	0.47	0	0	0	0	0	38.66	35.46	38.61	-8.43045	0.00519124	0.0243037	GUCY1A3	XP_005016603.1 PREDICTED: guanylate cyclase soluble subunit alpha-3 isoform X1 [Anas platyrhynchos]	Cellular Processes;Environmental Information Processing;Metabolism;Organismal Systems	Endocrine system;Nucleotide metabolism;Signal transduction;Nervous system;Environmental adaptation;Digestive system;Circulatory system;Immune system;Cellular community - eukaryotes	ko04022//cGMP - PKG signaling pathway;ko04921//Oxytocin signaling pathway;ko04270//Vascular smooth muscle contraction;ko04713//Circadian entrainment;ko00230//Purine metabolism;ko04611//Platelet activation;ko04924//Renin secretion;ko04540//Gap junction;ko04970//Salivary secretion;ko04730//Long-term depression	K12318	-	GO:0009975//cyclase activity;GO:0005488//binding;GO:0097159//organic cyclic compound binding;GO:0046906//tetrapyrrole binding;GO:0003824//catalytic activity;GO:0016829//lyase activity;GO:1901363//heterocyclic compound binding	GO:0044711//single-organism biosynthetic process;GO:0009260//ribonucleotide biosynthetic process;GO:0030810//positive regulation of nucleotide biosynthetic process;GO:0045935//positive regulation of nucleobase-containing compound metabolic process;GO:0051707//response to other organism;GO:0044699//single-organism process;GO:0009893//positive regulation of metabolic process;GO:0003012//muscle syst…
TCONS_00026952	38.34	26.95	31.93	30.6	15.73	18.39	16.13	13.56	4313.44	1648.29	3286.24	3069.4	920.96	2610.14	1578.23	1617.98	1.00226	0.00206182	0.0750886	FGF2	NP_990764.1 fibroblast growth factor 2 precursor [Gallus gallus]	Environmental Information Processing;Cellular Processes;Human Diseases	Cellular community - eukaryotes;Signal transduction;Infectious diseases;Drug resistance;Cancers;Cell motility	ko05200//Pathways in cancer;ko04010//MAPK signaling pathway;ko04151//PI3K-Akt signaling pathway;ko05205//Proteoglycans in cancer;ko04810//Regulation of actin cytoskeleton;ko04014//Ras signaling pathway;ko04015//Rap1 signaling pathway;ko05167//Kaposi sarcoma-associated herpesvirus infection;ko05226//Gastric cancer;ko04550//Signaling pathways regulating pluripotency of stem cells;ko05224//Breast ca…	K18497	GO:0043229//intracellular organelle;GO:0044464//cell part;GO:0005737//cytoplasm;GO:0005576//extracellular region;GO:0044421//extracellular region part;GO:0044424//intracellular part;GO:0043231//intracellular membrane-bounded organelle;GO:0043226//organelle;GO:0043227//membrane-bounded organelle;GO:0005622//intracellular;GO:0005623//cell;GO:0044444//cytoplasmic part	GO:0097367//carbohydrate derivative binding;GO:1901363//heterocyclic compound binding;GO:0005102//receptor binding;GO:0070851//growth factor receptor binding;GO:0001883//purine nucleoside binding;GO:0005488//binding;GO:0005515//protein binding;GO:0097159//organic cyclic compound binding;GO:0032549//ribonucleoside binding;GO:0032550//purine ribonucleoside binding;GO:0005539//glycosaminoglycan bind…	GO:0002065//columnar/cuboidal epithelial cell differentiation;GO:0002067//glandular epithelial cell differentiation;GO:0001934//positive regulation of protein phosphorylation;GO:0048513//animal organ development;GO:0080090//regulation of primary metabolic process;GO:0045765//regulation of angiogenesis;GO:0045595//regulation of cell differentiation;GO:0061138//morphogenesis of a branching epitheli…
TCONS_00027865	0.15	0	0	1.86	0	0	0	0	17.48	0	0	192.68	0	0	0	0	8.97298	0.00604926	0.305383	Reep1	XP_013033417.1 PREDICTED: receptor expression-enhancing protein 1 isoform X3 [Anser cygnoides domesticus]	-	-	-	-	-	-	-
TCONS_00027957	0.5	1.37	0	0.36	0	0	0	0	22.44	33.32	0	14.23	0	0	0	0	9.12283	0.00915061	0.0470356	DDRGK1	EOB08214.1 Uncharacterized protein C20orf116, partial [Anas platyrhynchos]	-	-	-	-	-	-	-
TCONS_00028018	1.48	2.47	0	0	0	0	0	0.01	255.66	231.87	0	0	0.15	0	0	1.38	8.62571	0.000749876	0.135755	ZNF638	XP_012962986.1 PREDICTED: LOW QUALITY PROTEIN: zinc finger protein 638 [Anas platyrhynchos]	-	-	-	-	-	-	-
TCONS_00028020	0	0.93	0.47	0	0	0	0	0	0	88.99	75.51	0	0	0	0	0	8.45121	0.0055602	0.136124	ZNF638	XP_012962986.1 PREDICTED: LOW QUALITY PROTEIN: zinc finger protein 638 [Anas platyrhynchos]	-	-	-	-	-	-	-
TCONS_00028171	1.11	0	2.83	1.14	0	0	0	0	191.97	0	447.74	175.79	0	0	0	0	10.3106	2.63e-06	0.0689809	TANC1	XP_012962406.1 PREDICTED: protein TANC1 isoform X3 [Anas platyrhynchos]	-	-	-	-	GO:0044464//cell part;GO:0042995//cell projection;GO:0033267//axon part;GO:0005623//cell;GO:0044297//cell body;GO:0043005//neuron projection;GO:0030424//axon;GO:0097458//neuron part;GO:0044463//cell projection part	-	GO:0009416//response to light stimulus;GO:0071840//cellular component organization or biogenesis;GO:0007610//behavior;GO:0009314//response to radiation;GO:0044707//single-multicellular organism process;GO:0016043//cellular component organization;GO:0009628//response to abiotic stimulus;GO:0007632//visual behavior;GO:0044763//single-organism cellular process;GO:0044708//single-organism behavior;GO…
TCONS_00028250	0	0	0	0	3.41	0	0	0.46	0	0	0	0	99.99	0	0	27.24	-9.91812	0.00838419	0.226685	ATL1	XP_012952891.1 PREDICTED: atlastin-1 isoform X2 [Anas platyrhynchos]	-	-	-	-	GO:0016020//membrane;GO:0005623//cell;GO:0044425//membrane part;GO:0044424//intracellular part;GO:0044464//cell part;GO:0043231//intracellular membrane-bounded organelle;GO:0043229//intracellular organelle;GO:0043227//membrane-bounded organelle;GO:0005622//intracellular;GO:0043226//organelle;GO:0031224//intrinsic component of membrane	GO:0001882//nucleoside binding;GO:0097367//carbohydrate derivative binding;GO:0001883//purine nucleoside binding;GO:0032550//purine ribonucleoside binding;GO:0036094//small molecule binding;GO:1901363//heterocyclic compound binding;GO:0097159//organic cyclic compound binding;GO:0005515//protein binding;GO:0005488//binding;GO:0032549//ribonucleoside binding	GO:0043933//macromolecular complex subunit organization;GO:0006996//organelle organization;GO:0051259//protein oligomerization;GO:0071840//cellular component organization or biogenesis;GO:0016043//cellular component organization;GO:0044085//cellular component biogenesis;GO:0006461//protein complex assembly;GO:0009987//cellular process;GO:0070271//protein complex biogenesis;GO:0022607//cellular co…
TCONS_00028867	17.29	14.43	13.86	11.22	31.95	33.69	25.79	35.34	3092.78	1402.91	2267.74	1788.61	2972.91	7601.18	4012.63	6704.28	-1.15825	0.000233984	0.0326714	TMED8	EOB05509.1 Protein TMED8, partial [Anas platyrhynchos]	-	-	-	-	-	-	-
TCONS_00028882	54.81	49.03	27.46	66.49	11.29	1.38	18.42	16.21	5184.46	2520.94	2375.74	5607.37	555.67	165.22	1515.66	1626.2	2.06406	0.000349507	0.0189419	Zdhhc22	XP_005013933.1 PREDICTED: palmitoyltransferase ZDHHC22 [Anas platyrhynchos]	-	-	-	-	GO:0005623//cell;GO:0043231//intracellular membrane-bounded organelle;GO:0044425//membrane part;GO:0031224//intrinsic component of membrane;GO:0043229//intracellular organelle;GO:0005622//intracellular;GO:0043226//organelle;GO:0044464//cell part;GO:0044424//intracellular part;GO:0016020//membrane;GO:0043227//membrane-bounded organelle	GO:0016740//transferase activity;GO:0043167//ion binding;GO:0046872//metal ion binding;GO:0016409//palmitoyltransferase activity;GO:0016746//transferase activity, transferring acyl groups;GO:0046914//transition metal ion binding;GO:0043169//cation binding;GO:0003824//catalytic activity;GO:0005488//binding;GO:0016747//transferase activity, transferring acyl groups other than amino-acyl groups	GO:0071704//organic substance metabolic process;GO:0044802//single-organism membrane organization;GO:0042158//lipoprotein biosynthetic process;GO:0008152//metabolic process;GO:0044249//cellular biosynthetic process;GO:0010256//endomembrane system organization;GO:0006497//protein lipidation;GO:0009987//cellular process;GO:0044260//cellular macromolecule metabolic process;GO:0061024//membrane organ…
TCONS_00029079	39.63	29.08	79.1	37.27	21.36	31.84	17.83	12.28	2328.48	928.7	4251.02	1952.16	652.99	2359.87	910.98	765.51	1.15159	0.00727924	0.187199	Lsp1	EOB01239.1 Lymphocyte-specific protein 1, partial [Anas platyrhynchos]	Organismal Systems;Human Diseases	Immune system;Infectious diseases	ko05152//Tuberculosis;ko04625//C-type lectin receptor signaling pathway	K14957	GO:0031982//vesicle;GO:0043227//membrane-bounded organelle;GO:0043226//organelle;GO:0031988//membrane-bounded vesicle	-	GO:0050789//regulation of biological process;GO:0006950//response to stress;GO:0050794//regulation of cellular process;GO:0050896//response to stimulus;GO:0042221//response to chemical;GO:0065007//biological regulation
TCONS_00029171	0	0	0	0	0.59	0.1	0.12	0.14	0	0	0	0	35.3	14.82	12.32	17.09	-7.89178	0.00188298	0.00895579	PTPN5	EOA95098.1 Tyrosine-protein phosphatase non-receptor type 5, partial [Anas platyrhynchos]	Environmental Information Processing	Signal transduction	ko04010//MAPK signaling pathway	K18018	-	-	-
TCONS_00029265	0	0	0	0	0.42	1.06	0.39	0	0	0	0	0	40.7	248.21	63.17	0	-8.86882	0.000290671	0.160466	MYRF	XP_015718702.1 PREDICTED: myelin regulatory factor isoform X4 [Coturnix japonica]	-	-	-	-	GO:0005623//cell;GO:0044424//intracellular part;GO:0043226//organelle;GO:0043231//intracellular membrane-bounded organelle;GO:0043229//intracellular organelle;GO:0005622//intracellular;GO:0044464//cell part;GO:0043227//membrane-bounded organelle	GO:0001071//nucleic acid binding transcription factor activity	GO:0031641//regulation of myelination;GO:0016043//cellular component organization;GO:0044767//single-organism developmental process;GO:0019219//regulation of nucleobase-containing compound metabolic process;GO:0007272//ensheathment of neurons;GO:0031323//regulation of cellular metabolic process;GO:0048731//system development;GO:0010256//endomembrane system organization;GO:0048468//cell developmen…
TCONS_00029419	0	0	0	0	1.67	0.49	0	0	0	0	0.42	0.07	99.67	70.49	0.25	0	-9.07682	0.00312766	0.143324	Arhgap1	EOB05437.1 Rho GTPase-activating protein 1, partial [Anas platyrhynchos]	-	-	-	-	-	-	-
TCONS_00030015	6.34	3.7	16.32	6.65	0.44	2.88	2.08	1.53	238.77	75.73	562.54	223.36	8.55	136.88	68.05	61	2.25198	0.00965169	0.0992064	Cd44	XP_005011362.1 PREDICTED: CD44 antigen isoform X12 [Anas platyrhynchos]	Organismal Systems;Human Diseases;Environmental Information Processing	Cancers;Infectious diseases;Immune system;Signaling molecules and interaction	ko05205//Proteoglycans in cancer;ko05206//MicroRNAs in cancer;ko05169//Epstein-Barr virus infection;ko04512//ECM-receptor interaction;ko04640//Hematopoietic cell lineage;ko05131//Shigellosis	K06256	GO:0031224//intrinsic component of membrane;GO:0043231//intracellular membrane-bounded organelle;GO:0070161//anchoring junction;GO:0005912//adherens junction;GO:0071944//cell periphery;GO:0005924//cell-substrate adherens junction;GO:0030055//cell-substrate junction;GO:0005623//cell;GO:0044459//plasma membrane part;GO:0043227//membrane-bounded organelle;GO:0005622//intracellular;GO:0044424//intrac…	GO:0016798//hydrolase activity, acting on glycosyl bonds;GO:0004553//hydrolase activity, hydrolyzing O-glycosyl compounds;GO:0060089//molecular transducer activity;GO:0003824//catalytic activity;GO:0016787//hydrolase activity;GO:0005539//glycosaminoglycan binding;GO:0038023//signaling receptor activity;GO:0097367//carbohydrate derivative binding;GO:0005488//binding;GO:0004872//receptor activity;G…	GO:0048731//system development;GO:0044767//single-organism developmental process;GO:0023056//positive regulation of signaling;GO:0051246//regulation of protein metabolic process;GO:0001934//positive regulation of protein phosphorylation;GO:0045937//positive regulation of phosphate metabolic process;GO:0016337//single organismal cell-cell adhesion;GO:0071363//cellular response to growth factor sti…
TCONS_00030298	0	0	0	0	0.38	0.44	0	2.04	0	0	0	0	36.14	100.38	0	391.2	-9.4818	8.13e-05	0.188251	HIPK3	XP_005022097.1 PREDICTED: homeodomain-interacting protein kinase 3 isoform X2 [Anas platyrhynchos]	Cellular Processes	Cell growth and death	ko04218//Cellular senescence	K08826	GO:0043233//organelle lumen;GO:0043227//membrane-bounded organelle;GO:0043229//intracellular organelle;GO:0005623//cell;GO:0044428//nuclear part;GO:0016604//nuclear body;GO:0044451//nucleoplasm part;GO:0005654//nucleoplasm;GO:0031974//membrane-enclosed lumen;GO:0043226//organelle;GO:0070013//intracellular organelle lumen;GO:0044446//intracellular organelle part;GO:0005634//nucleus;GO:0044464//cel…	GO:0036094//small molecule binding;GO:0005488//binding;GO:0001883//purine nucleoside binding;GO:0016301//kinase activity;GO:0016740//transferase activity;GO:0032549//ribonucleoside binding;GO:0016772//transferase activity, transferring phosphorus-containing groups;GO:0003824//catalytic activity;GO:0032550//purine ribonucleoside binding;GO:1901363//heterocyclic compound binding;GO:0004672//protein…	GO:0019438//aromatic compound biosynthetic process;GO:0034645//cellular macromolecule biosynthetic process;GO:0010646//regulation of cell communication;GO:0031323//regulation of cellular metabolic process;GO:0044092//negative regulation of molecular function;GO:0045936//negative regulation of phosphate metabolic process;GO:0009987//cellular process;GO:0009058//biosynthetic process;GO:0051246//reg…
TCONS_00030543	2.86	3.15	6.16	9.67	19.39	20.78	27.03	11.53	430.9	258.26	849.08	1299.65	1521.28	3953.38	3544.41	1843.74	-1.84994	5.88e-05	0.0213546	ACVR1C	XP_005027692.1 PREDICTED: activin receptor type-1C [Anas platyrhynchos]	Cellular Processes;Environmental Information Processing	Signaling molecules and interaction;Signal transduction;Cellular community - eukaryotes	ko04060//Cytokine-cytokine receptor interaction;ko04550//Signaling pathways regulating pluripotency of stem cells;ko04350//TGF-beta signaling pathway	K13568	GO:0043235//receptor complex;GO:0016020//membrane;GO:0031224//intrinsic component of membrane;GO:0044425//membrane part;GO:0032991//macromolecular complex;GO:0043234//protein complex	GO:1901363//heterocyclic compound binding;GO:0017002//activin-activated receptor activity;GO:0099600//transmembrane receptor activity;GO:0004872//receptor activity;GO:0004675//transmembrane receptor protein serine/threonine kinase activity;GO:0097159//organic cyclic compound binding;GO:0004871//signal transducer activity;GO:0038023//signaling receptor activity;GO:0005515//protein binding;GO:00048…	GO:2000146//negative regulation of cell motility;GO:0048518//positive regulation of biological process;GO:0009743//response to carbohydrate;GO:0051046//regulation of secretion;GO:0046883//regulation of hormone secretion;GO:0008219//cell death;GO:0007166//cell surface receptor signaling pathway;GO:0010033//response to organic substance;GO:0030334//regulation of cell migration;GO:0044267//cellular …
TCONS_00030865	0.24	0	1	0	0	0	0	0	38.09	0	143.99	0	0	0	0	0	8.27612	0.00738354	0.229471	SGPP1	XP_005022737.1 PREDICTED: sphingosine-1-phosphate phosphatase 1, partial [Anas platyrhynchos]	Metabolism;Environmental Information Processing	Lipid metabolism;Signal transduction	ko04071//Sphingolipid signaling pathway;ko00600//Sphingolipid metabolism	K04716	GO:0044464//cell part;GO:0043231//intracellular membrane-bounded organelle;GO:0044424//intracellular part;GO:0043229//intracellular organelle;GO:0005623//cell;GO:0005622//intracellular;GO:0043226//organelle;GO:0043227//membrane-bounded organelle	GO:0003824//catalytic activity;GO:0042578//phosphoric ester hydrolase activity;GO:0016787//hydrolase activity;GO:0016788//hydrolase activity, acting on ester bonds;GO:0016791//phosphatase activity	GO:0009987//cellular process;GO:0019751//polyol metabolic process;GO:0044238//primary metabolic process;GO:0006796//phosphate-containing compound metabolic process;GO:0023052//signaling;GO:0044710//single-organism metabolic process;GO:0044237//cellular metabolic process;GO:0050896//response to stimulus;GO:0006629//lipid metabolic process;GO:0050794//regulation of cellular process;GO:1901615//orga…
TCONS_00031208	0	4.6	3.21	0	0	0	0	0	0	139.98	164.39	0	0	0	0	0	10.9311	0.00139872	0.136033	TDP1	XP_013037800.1 PREDICTED: tyrosyl-DNA phosphodiesterase 1 [Anser cygnoides domesticus]	-	-	-	-	GO:0005623//cell;GO:0044424//intracellular part;GO:0005622//intracellular;GO:0043227//membrane-bounded organelle;GO:0043226//organelle;GO:0043231//intracellular membrane-bounded organelle;GO:0044464//cell part;GO:0043229//intracellular organelle	GO:1901363//heterocyclic compound binding;GO:0042578//phosphoric ester hydrolase activity;GO:0003824//catalytic activity;GO:0003677//DNA binding;GO:0003676//nucleic acid binding;GO:0070259//tyrosyl-DNA phosphodiesterase activity;GO:0008081//phosphoric diester hydrolase activity;GO:0016788//hydrolase activity, acting on ester bonds;GO:0005488//binding;GO:0043566//structure-specific DNA binding;GO:…	GO:0006807//nitrogen compound metabolic process;GO:0006974//cellular response to DNA damage stimulus;GO:1901360//organic cyclic compound metabolic process;GO:0033554//cellular response to stress;GO:0090304//nucleic acid metabolic process;GO:0034641//cellular nitrogen compound metabolic process;GO:0043170//macromolecule metabolic process;GO:0051716//cellular response to stimulus;GO:0044238//primar…
TCONS_00031569	0	0	0	0	0	12.35	0	0	0.39	0.13	0.39	0.24	0	1584.29	0.36	0	-11.5922	0.000485797	0.356106	TOLLIP	XP_012955147.1 PREDICTED: toll-interacting protein isoform X5 [Anas platyrhynchos]	Organismal Systems	Immune system	ko04620//Toll-like receptor signaling pathway	K05402	GO:0005623//cell;GO:0005622//intracellular;GO:0044464//cell part;GO:0043226//organelle;GO:0043227//membrane-bounded organelle;GO:0031988//membrane-bounded vesicle;GO:0044424//intracellular part;GO:0031982//vesicle	GO:0005102//receptor binding;GO:0005488//binding;GO:0005515//protein binding;GO:0019899//enzyme binding	GO:0044248//cellular catabolic process;GO:0009056//catabolic process;GO:0033036//macromolecule localization;GO:0070727//cellular macromolecule localization;GO:0006950//response to stress;GO:0048869//cellular developmental process;GO:0044699//single-organism process;GO:0033365//protein localization to organelle;GO:0030154//cell differentiation;GO:0044763//single-organism cellular process;GO:004423…
TCONS_00031797	54.76	35.6	50.64	47.04	18.52	21.95	28.42	21.99	2972.32	1050.14	2514.29	2276.29	523	1502.94	1341.41	1266.18	1.049	0.0026572	0.0655532	RIC8A	XP_005030249.1 PREDICTED: synembryn-A [Anas platyrhynchos]	-	-	-	-	GO:0044424//intracellular part;GO:0005623//cell;GO:0044464//cell part;GO:0016020//membrane;GO:0005622//intracellular	-	GO:0032501//multicellular organismal process;GO:0007188//adenylate cyclase-modulating G-protein coupled receptor signaling pathway;GO:0051336//regulation of hydrolase activity;GO:0050896//response to stimulus;GO:0007369//gastrulation;GO:0009790//embryo development;GO:0050789//regulation of biological process;GO:0044767//single-organism developmental process;GO:0071840//cellular component organiza…
TCONS_00031946	0.6	0	0.83	0	0	0	0	0	147.94	0	188.52	0	0	0	0	0	8.4818	0.00183637	0.138618	ZNF106	XP_005021740.1 PREDICTED: zinc finger protein 106 isoform X1 [Anas platyrhynchos]	-	-	-	-	GO:0005622//intracellular;GO:0044424//intracellular part;GO:0005737//cytoplasm;GO:0044444//cytoplasmic part;GO:0005623//cell;GO:0044464//cell part	GO:0003723//RNA binding;GO:0097159//organic cyclic compound binding;GO:0019904//protein domain specific binding;GO:0003676//nucleic acid binding;GO:1901363//heterocyclic compound binding;GO:0043167//ion binding;GO:0043169//cation binding;GO:0005488//binding;GO:0005515//protein binding	GO:0007166//cell surface receptor signaling pathway;GO:0044763//single-organism cellular process;GO:0050789//regulation of biological process;GO:0050794//regulation of cellular process;GO:0044699//single-organism process;GO:0050896//response to stimulus;GO:0007154//cell communication;GO:0007169//transmembrane receptor protein tyrosine kinase signaling pathway;GO:0065007//biological regulation;GO:…
TCONS_00032200	68.37	88.37	56.44	96.33	44.74	20.52	25.78	12.84	6296.93	4424.29	4755.05	7911.3	2144.01	2383.98	2064.95	1254.59	1.57507	8.27e-05	0.00353015	GREM1	XP_012954349.1 PREDICTED: gremlin-1 [Anas platyrhynchos]	-	-	-	-	GO:0044421//extracellular region part;GO:0005623//cell;GO:0044464//cell part;GO:0005576//extracellular region	GO:0019209//kinase activator activity;GO:0005126//cytokine receptor binding;GO:0005488//binding;GO:0098772//molecular function regulator;GO:0070851//growth factor receptor binding;GO:0030234//enzyme regulator activity;GO:0019207//kinase regulator activity;GO:0030296//protein tyrosine kinase activator activity;GO:0030295//protein kinase activator activity;GO:0005102//receptor binding;GO:0019887//p…	GO:0065009//regulation of molecular function;GO:0016477//cell migration;GO:0050789//regulation of biological process;GO:0003002//regionalization;GO:0031952//regulation of protein autophosphorylation;GO:0051052//regulation of DNA metabolic process;GO:0051239//regulation of multicellular organismal process;GO:0001934//positive regulation of protein phosphorylation;GO:0010468//regulation of gene exp…
TCONS_00032308	1.26	0	0	0.59	0	0	0	0	242.43	0	0	101.3	0	0	0	0	8.85331	0.0018669	0.184821	HEATR5A	XP_012956065.1 PREDICTED: HEAT repeat-containing protein 5A isoform X5 [Anas platyrhynchos]	-	-	-	-	-	-	-
TCONS_00032576	1.26	0.2	5.38	2.63	17.42	18.76	18.66	17.06	101.92	8.73	398.66	190.15	734.84	1918.39	1315.6	1467.02	-2.92456	2.77e-05	0.00373873	Nr1h3	XP_005028767.1 PREDICTED: oxysterols receptor LXR-alpha [Anas platyrhynchos]	Human Diseases;Organismal Systems	Infectious diseases;Endocrine and metabolic diseases;Endocrine system	ko05160//Hepatitis C;ko04931//Insulin resistance;ko04932//Non-alcoholic fatty liver disease (NAFLD);ko03320//PPAR signaling pathway	K08536	GO:0043227//membrane-bounded organelle;GO:0043231//intracellular membrane-bounded organelle;GO:0005623//cell;GO:0005622//intracellular;GO:0044424//intracellular part;GO:0043229//intracellular organelle;GO:0044464//cell part;GO:0043226//organelle	GO:0001071//nucleic acid binding transcription factor activity;GO:0001012//RNA polymerase II regulatory region DNA binding;GO:0004872//receptor activity;GO:0004871//signal transducer activity;GO:0044212//transcription regulatory region DNA binding;GO:0001067//regulatory region nucleic acid binding;GO:0097159//organic cyclic compound binding;GO:0046872//metal ion binding;GO:0043169//cation binding…	GO:1901700//response to oxygen-containing compound;GO:0044763//single-organism cellular process;GO:0044238//primary metabolic process;GO:0051252//regulation of RNA metabolic process;GO:0051223//regulation of protein transport;GO:0051051//negative regulation of transport;GO:0070201//regulation of establishment of protein localization;GO:0002237//response to molecule of bacterial origin;GO:0042592/…
TCONS_00033280	0	0	0	0	0	0	0	6.69	0	0	0	0	0	0	0	443.44	-10.7078	0.00643795	0.355918	Acta2	ERE79102.1 actin, aortic smooth muscle-like isoform 1 [Cricetulus griseus]	Organismal Systems;Environmental Information Processing	Signal transduction;Circulatory system;Endocrine system	ko04270//Vascular smooth muscle contraction;ko04371//Apelin signaling pathway;ko04926//Relaxin signaling pathway	K12313	GO:0044421//extracellular region part;GO:0032432//actin filament bundle;GO:0043226//organelle;GO:0031988//membrane-bounded vesicle;GO:0043227//membrane-bounded organelle;GO:0044430//cytoskeletal part;GO:0005576//extracellular region;GO:0005622//intracellular;GO:0015629//actin cytoskeleton;GO:0044424//intracellular part;GO:0031982//vesicle;GO:0043229//intracellular organelle;GO:0043228//non-membra…	GO:0032550//purine ribonucleoside binding;GO:0097367//carbohydrate derivative binding;GO:1901363//heterocyclic compound binding;GO:0001883//purine nucleoside binding;GO:0005488//binding;GO:0036094//small molecule binding;GO:0019900//kinase binding;GO:0019899//enzyme binding;GO:0032549//ribonucleoside binding;GO:0097159//organic cyclic compound binding;GO:0005515//protein binding;GO:0001882//nucle…	GO:0006936//muscle contraction;GO:0044767//single-organism developmental process;GO:0009987//cellular process;GO:0044763//single-organism cellular process;GO:0006939//smooth muscle contraction;GO:0044699//single-organism process;GO:0009605//response to external stimulus;GO:0030029//actin filament-based process;GO:0030154//cell differentiation;GO:0071840//cellular component organization or biogene…
TCONS_00034273	0	0	0	0	0	1.72	1.67	0	0	0	0	0	0	128.7	85.97	0	-9.72707	0.00622657	0.146511	Mxi1	EOB05128.1 MAX-interacting protein 1, partial [Anas platyrhynchos]	-	-	-	-	GO:0043232//intracellular non-membrane-bounded organelle;GO:0005623//cell;GO:0005622//intracellular;GO:0043229//intracellular organelle;GO:0044424//intracellular part;GO:0043226//organelle;GO:0043228//non-membrane-bounded organelle;GO:0043231//intracellular membrane-bounded organelle;GO:0044464//cell part;GO:0043227//membrane-bounded organelle	GO:0005488//binding;GO:0005515//protein binding	-
TCONS_00034371	23.01	18.24	37.2	23.37	14.42	8.4	6.87	7.39	984.23	424.09	1455.52	891.21	320.91	453.18	255.6	335.19	1.45731	0.0014781	0.0322262	Fbxw4	XP_010563304.1 PREDICTED: F-box/WD repeat-containing protein 4, partial [Haliaeetus leucocephalus]	-	-	-	-	-	-	GO:0048731//system development;GO:0035108//limb morphogenesis;GO:0044707//single-multicellular organism process;GO:0035107//appendage morphogenesis;GO:0048736//appendage development;GO:0035113//embryonic appendage morphogenesis;GO:0044767//single-organism developmental process;GO:0032502//developmental process;GO:0009653//anatomical structure morphogenesis;GO:0007275//multicellular organism devel…
TCONS_00035295	0	0	0	0	1.09	0	0	1.08	0	0	0	0	81.02	0	0	164.08	-9.08348	0.00326812	0.169328	IPMK	EOA95121.1 Inositol polyphosphate multikinase, partial [Anas platyrhynchos]	Metabolism;Environmental Information Processing	Signal transduction;Global and overview maps;Carbohydrate metabolism	ko01100//Metabolic pathways;ko04070//Phosphatidylinositol signaling system;ko00562//Inositol phosphate metabolism	K00915	-	-	-
TCONS_00035296	13.95	29.27	2.81	9.46	30.83	22.78	53.76	43.77	2099.16	2394.37	387.57	1269.98	2414.33	4325.32	7038.36	6987.51	-1.44559	0.00739419	0.0233442	IPMK	XP_012963035.1 PREDICTED: inositol polyphosphate multikinase [Anas platyrhynchos]	Environmental Information Processing;Metabolism	Signal transduction;Global and overview maps;Carbohydrate metabolism	ko01100//Metabolic pathways;ko04070//Phosphatidylinositol signaling system;ko00562//Inositol phosphate metabolism	K00915	-	-	-
TCONS_00035664	0.03	0	0	0	0.25	0.08	0.33	2.56	2	0	0	0	9	7	20	190	-6.74595	0.00278302	0.255889	-	-	-	-	-	-	-	-	-
TCONS_00037643	0.09	0.06	0.03	0.07	0	0	0	0	20.97	7.17	6.22	14.12	0	0	0	0	5.96578	0.00642603	0.0124002	CREB1	XP_005049211.1 PREDICTED: cyclic AMP-responsive element-binding protein 1 isoform X2 [Ficedula albicollis]	Organismal Systems;Human Diseases;Environmental Information Processing	Aging;Endocrine and metabolic diseases;Substance dependence;Circulatory system;Infectious diseases;Neurodegenerative diseases;Immune system;Excretory system;Endocrine system;Cancers;Nervous system;Signal transduction;Development;Environmental adaptation	ko05165//Human papillomavirus infection;ko04151//PI3K-Akt signaling pathway;ko04024//cAMP signaling pathway;ko04022//cGMP - PKG signaling pathway;ko05166//HTLV-I infection;ko04261//Adrenergic signaling in cardiomyocytes;ko04934//Cushing syndrome;ko05163//Human cytomegalovirus infection;ko05203//Viral carcinogenesis;ko05152//Tuberculosis;ko04728//Dopaminergic synapse;ko05167//Kaposi sarcoma-associ…	K05870	GO:0044422//organelle part;GO:0043226//organelle;GO:0005623//cell;GO:0005634//nucleus;GO:0031974//membrane-enclosed lumen;GO:0044424//intracellular part;GO:0043232//intracellular non-membrane-bounded organelle;GO:0043234//protein complex;GO:0043229//intracellular organelle;GO:0031981//nuclear lumen;GO:0070013//intracellular organelle lumen;GO:0005622//intracellular;GO:0044464//cell part;GO:004442…	GO:0000988//transcription factor activity, protein binding;GO:0000977//RNA polymerase II regulatory region sequence-specific DNA binding;GO:0001085//RNA polymerase II transcription factor binding;GO:0005515//protein binding;GO:0003690//double-stranded DNA binding;GO:0000981//RNA polymerase II transcription factor activity, sequence-specific DNA binding;GO:0003677//DNA binding;GO:0001012//RNA poly…	GO:0010646//regulation of cell communication;GO:0090066//regulation of anatomical structure size;GO:0051234//establishment of localization;GO:0051094//positive regulation of developmental process;GO:0048731//system development;GO:2000113//negative regulation of cellular macromolecule biosynthetic process;GO:0031326//regulation of cellular biosynthetic process;GO:0048523//negative regulation of ce…
TCONS_00037954	0.08	0.09	0.11	0.08	0	0	0	0	17.06	11	21.23	15.07	0	0	0	0	6.49185	0.00286772	0.00027745	CERS6	XP_012954310.1 PREDICTED: ceramide synthase 6 [Anas platyrhynchos]	Environmental Information Processing;Metabolism	Signal transduction;Global and overview maps;Lipid metabolism	ko01100//Metabolic pathways;ko04071//Sphingolipid signaling pathway;ko00600//Sphingolipid metabolism	K04710	-	-	-
TCONS_00038608	0	0	0	0	0	0.12	0.94	0	0	0	0	0	0	24.87	133.74	0	-8.04985	0.00983986	0.260304	DOCK7	XP_015726176.1 PREDICTED: dedicator of cytokinesis protein 7 isoform X9 [Coturnix japonica]	-	-	-	-	-	-	-
TCONS_00039718	1.22	1.23	0	0	0	0	0	0	105.05	57.53	0	0	0	0	0	0	9.25857	0.00743395	0.160564	EVI5	EOA96380.1 Ecotropic viral integration site 5 protein-like protein, partial [Anas platyrhynchos]	-	-	-	-	-	-	-
TCONS_00039832	0	0	0	0	1.53	2.33	5.75	3.62	0	0.01	0	0	152.57	562.44	956.5	735.36	-11.6915	7.13e-20	0.0122419	Ank3	XP_015143560.1 PREDICTED: ankyrin-3 isoform X9 [Gallus gallus]	Organismal Systems;Human Diseases	Immune system;Cancers	ko05205//Proteoglycans in cancer;ko04624//Toll and Imd signaling pathway	K10380	-	-	-
TCONS_00039961	1.86	0	0	0	0	0	0	0	381.96	0	0	0	0	0	0	0	8.86109	0.00771277	0.355918	JMJD1C	EOB04273.1 Putative JmjC domain-containing histone demethylation protein 2C, partial [Anas platyrhynchos]	Human Diseases	Cancers	ko05202//Transcriptional misregulation in cancers	K11449	-	-	-
TCONS_00040196	0.04	0.31	6.77	0.06	0	0.07	0.09	0.01	9.42	36.18	1329.1	11.69	0.02	19.35	15.87	1.35	5.40038	0.00103468	0.342692	Nfia	XP_012430779.1 PREDICTED: nuclear factor 1 A-type isoform X3 [Taeniopygia guttata]	-	-	-	-	GO:0044428//nuclear part;GO:0043231//intracellular membrane-bounded organelle;GO:0043227//membrane-bounded organelle;GO:0031974//membrane-enclosed lumen;GO:0043229//intracellular organelle;GO:0005634//nucleus;GO:0005622//intracellular;GO:0044422//organelle part;GO:0044446//intracellular organelle part;GO:0044464//cell part;GO:0043226//organelle;GO:0070013//intracellular organelle lumen;GO:0044424…	GO:1990837//sequence-specific double-stranded DNA binding;GO:0001012//RNA polymerase II regulatory region DNA binding;GO:0005488//binding;GO:0000975//regulatory region DNA binding;GO:1901363//heterocyclic compound binding;GO:0097159//organic cyclic compound binding;GO:0003700//transcription factor activity, sequence-specific DNA binding;GO:0001067//regulatory region nucleic acid binding;GO:000551…	GO:0060255//regulation of macromolecule metabolic process;GO:0006725//cellular aromatic compound metabolic process;GO:0006139//nucleobase-containing compound metabolic process;GO:0090304//nucleic acid metabolic process;GO:0006807//nitrogen compound metabolic process;GO:0051252//regulation of RNA metabolic process;GO:0031323//regulation of cellular metabolic process;GO:0008152//metabolic process;G…
TCONS_00040227	0	0	0	0	2.99	0.58	0	0	0	0	0	0	208.27	98.3	0	0	-9.80171	0.00131837	0.17338	DAB1	XP_011570431.1 PREDICTED: disabled homolog 1 isoform X1 [Aquila chrysaetos canadensis]	-	-	-	-	-	-	-
TCONS_00040279	1.84	5.5	0	1.44	0	0	0	0	67.69	110	0	47.26	0	0	0	0	11.1	0.00041687	0.0490337	TCEANC2	EOB00370.1 Uncharacterized protein C1orf83, partial [Anas platyrhynchos]	-	-	-	-	-	-	-
TCONS_00040543	0.23	1.12	0.97	0.3	0	0	0	0	22.99	61.39	89.23	27.21	0	0	0	0	9.35535	5.85e-05	0.018141	USP33	XP_012959727.1 PREDICTED: ubiquitin carboxyl-terminal hydrolase 33 isoform X4 [Anas platyrhynchos]	-	-	-	-	GO:0044464//cell part;GO:0005622//intracellular;GO:0044430//cytoskeletal part;GO:0044422//organelle part;GO:0005856//cytoskeleton;GO:0015630//microtubule cytoskeleton;GO:0044446//intracellular organelle part;GO:0044424//intracellular part;GO:0005623//cell;GO:0043226//organelle;GO:0043229//intracellular organelle;GO:0005815//microtubule organizing center;GO:0043228//non-membrane-bounded organelle;…	GO:0005488//binding;GO:0016787//hydrolase activity;GO:0043167//ion binding;GO:0019783//ubiquitin-like protein-specific protease activity;GO:0036459//thiol-dependent ubiquitinyl hydrolase activity;GO:0046872//metal ion binding;GO:0043169//cation binding;GO:0101005//ubiquitinyl hydrolase activity;GO:0003824//catalytic activity;GO:0008234//cysteine-type peptidase activity;GO:0008233//peptidase activ…	GO:0007186//G-protein coupled receptor signaling pathway;GO:0040011//locomotion;GO:0009605//response to external stimulus;GO:0050789//regulation of biological process;GO:0044763//single-organism cellular process;GO:0030030//cell projection organization;GO:0051179//localization;GO:0071704//organic substance metabolic process;GO:0007165//signal transduction;GO:0008152//metabolic process;GO:0050896/…
TCONS_00040963	14.83	14.08	12.41	24.53	32.48	27.71	46.43	36.99	939.19	484.77	718.87	1385.61	1070.38	2214.36	2557.91	2485.15	-1.1249	0.00331432	0.0228482	GLUL	XP_013054906.1 PREDICTED: glutamine synthetase [Anser cygnoides domesticus]	Cellular Processes;Metabolism;Organismal Systems	Nervous system;Amino acid metabolism;Energy metabolism;Cell growth and death;Carbohydrate metabolism;Global and overview maps	ko01100//Metabolic pathways;ko04724//Glutamatergic synapse;ko04217//Necroptosis;ko04727//GABAergic synapse;ko01230//Biosynthesis of amino acids;ko00250//Alanine, aspartate and glutamate metabolism;ko00630//Glyoxylate and dicarboxylate metabolism;ko00220//Arginine biosynthesis;ko00910//Nitrogen metabolism	K01915	GO:0044464//cell part;GO:0005622//intracellular;GO:0044424//intracellular part;GO:0043227//membrane-bounded organelle;GO:0031982//vesicle;GO:0031988//membrane-bounded vesicle;GO:0043231//intracellular membrane-bounded organelle;GO:0043229//intracellular organelle;GO:0043226//organelle;GO:0042995//cell projection;GO:0005623//cell	GO:0032549//ribonucleoside binding;GO:0001882//nucleoside binding;GO:0016879//ligase activity, forming carbon-nitrogen bonds;GO:0097159//organic cyclic compound binding;GO:0005488//binding;GO:1901363//heterocyclic compound binding;GO:0001883//purine nucleoside binding;GO:0003824//catalytic activity;GO:0036094//small molecule binding;GO:0097367//carbohydrate derivative binding;GO:0016211//ammonia …	GO:0044238//primary metabolic process;GO:0034284//response to monosaccharide;GO:0050896//response to stimulus;GO:0006541//glutamine metabolic process;GO:0019752//carboxylic acid metabolic process;GO:0009064//glutamine family amino acid metabolic process;GO:1901700//response to oxygen-containing compound;GO:0071704//organic substance metabolic process;GO:0044710//single-organism metabolic process;…
TCONS_00041183	0.09	0.15	0.18	0.1	0	0	0	0	7.43	7	14	7.34	0	0	0	0	7.02237	0.009921	0.00183593	F13B	XP_009584153.1 PREDICTED: coagulation factor XIII B chain [Fulmarus glacialis]	Organismal Systems	Immune system	ko04610//Complement and coagulation cascades	K03906	-	-	-
TCONS_00041433	50.51	51.86	65.78	50.51	23.61	41.58	23.21	16.39	1858.72	1037.29	2214.14	1657.36	451.92	1929.93	742.95	639.64	1.06119	0.00731559	0.121216	EPHX4	EOA96364.1 Abhydrolase domain-containing protein 7, partial [Anas platyrhynchos]	-	-	-	-	-	-	-
TCONS_00041814	0	0	0	0	0.99	0.42	0.43	0	0	0	0	0.25	128.96	131.3	93.1	0	-8.84549	7.65e-05	0.0282816	ABCC5	XP_005022493.1 PREDICTED: multidrug resistance-associated protein 5 isoform X6 [Anas platyrhynchos]	Human Diseases;Environmental Information Processing	Membrane transport;Drug resistance	ko02010//ABC transporters;ko01523//Antifolate resistance	K05668	GO:0044425//membrane part;GO:0031224//intrinsic component of membrane;GO:0016020//membrane	GO:0036094//small molecule binding;GO:0008509//anion transmembrane transporter activity;GO:0017111//nucleoside-triphosphatase activity;GO:0022804//active transmembrane transporter activity;GO:0022857//transmembrane transporter activity;GO:0097159//organic cyclic compound binding;GO:0016817//hydrolase activity, acting on acid anhydrides;GO:0001882//nucleoside binding;GO:1901363//heterocyclic compo…	GO:0044763//single-organism cellular process;GO:0044765//single-organism transport;GO:0051179//localization;GO:0051234//establishment of localization;GO:0006811//ion transport;GO:0009987//cellular process;GO:1902578//single-organism localization;GO:0006810//transport;GO:0044699//single-organism process;GO:0006820//anion transport
TCONS_00042543	0	0	0	0	0	0	11.62	0	0	0	0	0	0	0	1102.43	0	-11.5043	0.000813694	0.355918	WWTR1	EOA98286.1 WW domain-containing transcription regulator protein 1, partial [Anas platyrhynchos]	Environmental Information Processing	Signal transduction	ko04390//Hippo signaling pathway;ko04392//Hippo signaling pathway - multiple species	K16820	GO:0043231//intracellular membrane-bounded organelle;GO:0043234//protein complex;GO:0044424//intracellular part;GO:0044464//cell part;GO:0032991//macromolecular complex;GO:0043227//membrane-bounded organelle;GO:0005622//intracellular;GO:0043226//organelle;GO:0043229//intracellular organelle;GO:0005623//cell	GO:0003712//transcription cofactor activity;GO:0046983//protein dimerization activity;GO:0005515//protein binding;GO:0000989//transcription factor activity, transcription factor binding;GO:0000988//transcription factor activity, protein binding;GO:0005488//binding	GO:0032501//multicellular organismal process;GO:0035556//intracellular signal transduction;GO:0090183//regulation of kidney development;GO:0051223//regulation of protein transport;GO:0032446//protein modification by small protein conjugation;GO:0006464//cellular protein modification process;GO:0051171//regulation of nitrogen compound metabolic process;GO:0051246//regulation of protein metabolic p…
TCONS_00042645	41.01	33.75	20.7	42.64	86.84	58.13	95.72	107.31	1054.58	471.69	486.86	977.55	1161.66	1885.59	2140.64	2926.49	-1.33337	0.00075105	0.0178103	FOXO3	PREDICTED: forkhead box protein O3 [Haliaeetus leucocephalus]	Cellular Processes;Environmental Information Processing;Human Diseases;Organismal Systems	Transport and catabolism;Endocrine system;Cancers;Signal transduction;Nervous system;Cell growth and death;Aging;Drug resistance;Immune system	ko04151//PI3K-Akt signaling pathway;ko04062//Chemokine signaling pathway;ko04218//Cellular senescence;ko04722//Neurotrophin signaling pathway;ko04152//AMPK signaling pathway;ko04068//FoxO signaling pathway;ko04211//Longevity regulating pathway - mammal;ko01521//EGFR tyrosine kinase inhibitor resistance;ko05213//Endometrial cancer;ko05223//Non-small cell lung cancer;ko04917//Prolactin signaling pa…	K09408	-	-	-
TCONS_00042765	0	0	0	0	0	0.64	0.29	2.56	0.01	0	0	0	0	112.47	35.1	376.61	-9.76901	8.72e-05	0.174777	TNIK	XP_015147205.1 PREDICTED: TRAF2 and NCK-interacting protein kinase isoform X5 [Gallus gallus]	Environmental Information Processing	Signal transduction	ko04013//MAPK signaling pathway - fly	K08840	-	-	-
TCONS_00043309	0	0.09	10.71	0	0	0	0	0	0	4.16	851.15	0	0	0	0	0	11.3987	0.000507528	0.353019	CAB39	EPQ18131.1 Calcium-binding protein 39, partial [Myotis brandtii]	Environmental Information Processing	Signal transduction	ko04150//mTOR signaling pathway;ko04152//AMPK signaling pathway	K08272	GO:0043226//organelle;GO:0043227//membrane-bounded organelle;GO:0031988//membrane-bounded vesicle;GO:0031982//vesicle	GO:0019209//kinase activator activity;GO:0098772//molecular function regulator;GO:0008047//enzyme activator activity;GO:0019207//kinase regulator activity;GO:0019899//enzyme binding;GO:0030234//enzyme regulator activity;GO:0019887//protein kinase regulator activity;GO:0005488//binding;GO:0030295//protein kinase activator activity;GO:0005515//protein binding	GO:0001932//regulation of protein phosphorylation;GO:0044699//single-organism process;GO:0044700//single organism signaling;GO:0051246//regulation of protein metabolic process;GO:0050794//regulation of cellular process;GO:0032270//positive regulation of cellular protein metabolic process;GO:0065009//regulation of molecular function;GO:0007154//cell communication;GO:0048522//positive regulation of…
TCONS_00044162	0.41	0.73	0.52	0.31	2.91	1.59	1.87	1.57	102.83	99.66	119.64	70.33	379.25	502.78	409.07	416.78	-2.01094	0.00171644	2.52e-05	AGTR2	EOA93102.1 Type-2 angiotensin II receptor, partial [Anas platyrhynchos]	Organismal Systems;Environmental Information Processing	Endocrine system;Circulatory system;Signaling molecules and interaction	ko04080//Neuroactive ligand-receptor interaction;ko04261//Adrenergic signaling in cardiomyocytes;ko04614//Renin-angiotensin system	K04167	GO:0031224//intrinsic component of membrane;GO:0044425//membrane part;GO:0016020//membrane	GO:0038023//signaling receptor activity;GO:0008528//G-protein coupled peptide receptor activity;GO:0004872//receptor activity;GO:0060089//molecular transducer activity;GO:0001653//peptide receptor activity;GO:0001595//angiotensin receptor activity;GO:0004888//transmembrane signaling receptor activity;GO:0099600//transmembrane receptor activity;GO:0004930//G-protein coupled receptor activity;GO:00…	GO:0097191//extrinsic apoptotic signaling pathway;GO:0044700//single organism signaling;GO:0035304//regulation of protein dephosphorylation;GO:0043085//positive regulation of catalytic activity;GO:2000026//regulation of multicellular organismal development;GO:0065009//regulation of molecular function;GO:0044763//single-organism cellular process;GO:0090183//regulation of kidney development;GO:0048…
TCONS_00044672	0	0	0	0	0	0	1.67	0	0	0	0	0	0	0	319.01	0	-8.70563	0.00823285	0.355918	NXT2	XP_013040669.1 PREDICTED: NTF2-related export protein 2 [Anser cygnoides domesticus]	Human Diseases;Genetic Information Processing	Infectious diseases;Translation	ko05164//Influenza A;ko03013//RNA transport;ko03015//mRNA surveillance pathway;ko03008//Ribosome biogenesis in eukaryotes	K14285	GO:0005623//cell;GO:0044464//cell part;GO:0005622//intracellular;GO:0044424//intracellular part	-	GO:0033036//macromolecule localization;GO:0051234//establishment of localization;GO:0071705//nitrogen compound transport;GO:0051236//establishment of RNA localization;GO:0050658//RNA transport;GO:0071702//organic substance transport;GO:0015931//nucleobase-containing compound transport;GO:0051179//localization;GO:0006810//transport;GO:0008104//protein localization;GO:0006403//RNA localization;GO:0…
TCONS_00044820	0	0	0	0	0	5.81	0	4.67	0	0	0	0	0	674.99	0	456.34	-11.3554	9.86e-05	0.145803	Mtmr1	EOB00671.1 Myotubularin-related protein 1, partial [Anas platyrhynchos]	Environmental Information Processing;Metabolism	Signal transduction;Carbohydrate metabolism;Global and overview maps	ko01100//Metabolic pathways;ko04070//Phosphatidylinositol signaling system;ko00562//Inositol phosphate metabolism	K18081	GO:0005623//cell;GO:0044424//intracellular part;GO:0016020//membrane;GO:0005622//intracellular;GO:0044464//cell part	GO:0016787//hydrolase activity;GO:0004721//phosphoprotein phosphatase activity;GO:0052744//phosphatidylinositol monophosphate phosphatase activity;GO:0016791//phosphatase activity;GO:0003824//catalytic activity;GO:0042578//phosphoric ester hydrolase activity;GO:0016788//hydrolase activity, acting on ester bonds;GO:0052866//phosphatidylinositol phosphate phosphatase activity	GO:0044237//cellular metabolic process;GO:0044699//single-organism process;GO:0006644//phospholipid metabolic process;GO:0044255//cellular lipid metabolic process;GO:0006793//phosphorus metabolic process;GO:0071704//organic substance metabolic process;GO:0016311//dephosphorylation;GO:0046486//glycerolipid metabolic process;GO:0043412//macromolecule modification;GO:0044710//single-organism metabol…
TCONS_00045684	0	0.66	0.32	1.09	0	0	0	0	0	25.91	21.39	69.97	0	0	0	0	9.01542	0.00356537	0.0928261	ARIH1	XP_010715421.2 PREDICTED: E3 ubiquitin-protein ligase ARIH1 isoform X1 [Meleagris gallopavo]	-	-	-	-	GO:0044424//intracellular part;GO:0005623//cell;GO:0044464//cell part;GO:0005622//intracellular;GO:0005737//cytoplasm;GO:0044444//cytoplasmic part	GO:0019899//enzyme binding;GO:0043167//ion binding;GO:0005515//protein binding;GO:0019787//ubiquitin-like protein transferase activity;GO:0016740//transferase activity;GO:0046872//metal ion binding;GO:0046914//transition metal ion binding;GO:0005488//binding;GO:0044389//ubiquitin-like protein ligase binding;GO:0043169//cation binding;GO:0003824//catalytic activity	GO:0051603//proteolysis involved in cellular protein catabolic process;GO:0044699//single-organism process;GO:0023052//signaling;GO:0009987//cellular process;GO:0051716//cellular response to stimulus;GO:0044248//cellular catabolic process;GO:0030163//protein catabolic process;GO:0050794//regulation of cellular process;GO:0044700//single organism signaling;GO:0065007//biological regulation;GO:0019…
TCONS_00045760	0	0	0	0	0.24	4.16	4.58	0	0.01	0	0.04	0	7.09	303.19	229.8	0	-11.1325	0.00011907	0.131666	SNX33	XP_009277117.1 PREDICTED: sorting nexin-33 [Aptenodytes forsteri]	-	-	-	-	GO:0044444//cytoplasmic part;GO:0031982//vesicle;GO:0016020//membrane;GO:0031090//organelle membrane;GO:0043229//intracellular organelle;GO:0043226//organelle;GO:0044464//cell part;GO:0031988//membrane-bounded vesicle;GO:0043231//intracellular membrane-bounded organelle;GO:0005622//intracellular;GO:0005623//cell;GO:0044425//membrane part;GO:0005737//cytoplasm;GO:0044422//organelle part;GO:0044424…	GO:0005515//protein binding;GO:0043167//ion binding;GO:0008289//lipid binding;GO:0043168//anion binding;GO:0005488//binding;GO:0005543//phospholipid binding	GO:0065007//biological regulation;GO:0022402//cell cycle process;GO:0030100//regulation of endocytosis;GO:0032879//regulation of localization;GO:0048522//positive regulation of cellular process;GO:0006996//organelle organization;GO:0016043//cellular component organization;GO:0061024//membrane organization;GO:0051649//establishment of localization in cell;GO:0044765//single-organism transport;GO:0…
TCONS_00046317	0	0	0	0	0	1.37	0	3.26	0	0	0	0	0	206.71	0	412.74	-10.1768	0.000573843	0.168083	IQGAP1	EOA93825.1 Ras GTPase-activating-like protein IQGAP1, partial [Anas platyrhynchos]	Human Diseases;Cellular Processes	Cellular community - eukaryotes;Cancers;Cell motility	ko05205//Proteoglycans in cancer;ko04810//Regulation of actin cytoskeleton;ko04520//Adherens junction	K16848	GO:0043229//intracellular organelle;GO:0005623//cell;GO:0043228//non-membrane-bounded organelle;GO:1990904//ribonucleoprotein complex;GO:0032991//macromolecular complex;GO:0030054//cell junction;GO:0044425//membrane part;GO:0031988//membrane-bounded vesicle;GO:0043232//intracellular non-membrane-bounded organelle;GO:0005912//adherens junction;GO:0016020//membrane;GO:0035770//ribonucleoprotein gra…	GO:0019209//kinase activator activity;GO:0005515//protein binding;GO:0017016//Ras GTPase binding;GO:0019887//protein kinase regulator activity;GO:0043168//anion binding;GO:0019207//kinase regulator activity;GO:0017048//Rho GTPase binding;GO:0019899//enzyme binding;GO:1901981//phosphatidylinositol phosphate binding;GO:0035091//phosphatidylinositol binding;GO:0019900//kinase binding;GO:0031267//sma…	GO:0065009//regulation of molecular function;GO:0051246//regulation of protein metabolic process;GO:0019220//regulation of phosphate metabolic process;GO:0071310//cellular response to organic substance;GO:0007167//enzyme linked receptor protein signaling pathway;GO:0044699//single-organism process;GO:0032268//regulation of cellular protein metabolic process;GO:0031399//regulation of protein modif…
TCONS_00046614	0	0	0	0	0	0	0.37	0.14	0	0	0	0	0	0	101.61	47.96	-6.99435	0.00983846	0.173377	CHD2	XP_013037313.1 PREDICTED: chromodomain-helicase-DNA-binding protein 2 isoform X3 [Anser cygnoides domesticus]	-	-	-	-	GO:0044464//cell part;GO:0043231//intracellular membrane-bounded organelle;GO:0044424//intracellular part;GO:0043227//membrane-bounded organelle;GO:0005622//intracellular;GO:0031982//vesicle;GO:0043229//intracellular organelle;GO:0005623//cell;GO:0043226//organelle;GO:0031988//membrane-bounded vesicle	GO:0001883//purine nucleoside binding;GO:1901363//heterocyclic compound binding;GO:0032549//ribonucleoside binding;GO:0032550//purine ribonucleoside binding;GO:0001882//nucleoside binding;GO:0003676//nucleic acid binding;GO:0005515//protein binding;GO:0003723//RNA binding;GO:0005488//binding;GO:0097367//carbohydrate derivative binding;GO:0097159//organic cyclic compound binding;GO:0036094//small …	GO:0032501//multicellular organismal process;GO:0051716//cellular response to stimulus;GO:0002244//hematopoietic progenitor cell differentiation;GO:0044707//single-multicellular organism process;GO:0048731//system development;GO:0044763//single-organism cellular process;GO:0044699//single-organism process;GO:0032502//developmental process;GO:0007275//multicellular organism development;GO:0030097/…
TCONS_00046673	8.14	5.57	3.17	0	0	0.47	0	0	830.38	308.97	296.18	0	0.04	59.94	0	0	5.16651	0.00798786	0.0943911	NTRK3	XP_005017163.1 PREDICTED: NT-3 growth factor receptor isoform X5 [Anas platyrhynchos]	Organismal Systems;Human Diseases	Nervous system;Cancers	ko04722//Neurotrophin signaling pathway;ko05230//Central carbon metabolism in cancer	K05101	GO:0044425//membrane part;GO:0044424//intracellular part;GO:0031224//intrinsic component of membrane;GO:0016021//integral component of membrane;GO:0005623//cell;GO:0044464//cell part;GO:0032991//macromolecular complex;GO:0043234//protein complex;GO:0005622//intracellular;GO:0016020//membrane	GO:0060089//molecular transducer activity;GO:0038023//signaling receptor activity;GO:0032550//purine ribonucleoside binding;GO:0004713//protein tyrosine kinase activity;GO:0005515//protein binding;GO:0016773//phosphotransferase activity, alcohol group as acceptor;GO:0016301//kinase activity;GO:0004872//receptor activity;GO:0016772//transferase activity, transferring phosphorus-containing groups;G…	GO:0050794//regulation of cellular process;GO:0065008//regulation of biological quality;GO:0007423//sensory organ development;GO:0030516//regulation of axon extension;GO:0042327//positive regulation of phosphorylation;GO:0044763//single-organism cellular process;GO:0040008//regulation of growth;GO:0050790//regulation of catalytic activity;GO:0019220//regulation of phosphate metabolic process;GO:0…
TCONS_00046703	0.25	0.42	0.28	0	0	0	0	0	32.05	29.45	32.55	0	0	0	0	0	7.89178	0.00540492	0.0243583	MESDC2	XP_009942105.1 PREDICTED: LDLR chaperone MESD [Opisthocomus hoazin]	-	-	-	-	-	GO:0005488//binding;GO:0070325//lipoprotein particle receptor binding;GO:0005515//protein binding;GO:0005102//receptor binding	GO:0034613//cellular protein localization;GO:0051641//cellular localization;GO:0044237//cellular metabolic process;GO:0071704//organic substance metabolic process;GO:0009987//cellular process;GO:0008152//metabolic process;GO:0008104//protein localization;GO:0033036//macromolecule localization;GO:0044238//primary metabolic process;GO:0019538//protein metabolic process;GO:0070727//cellular macromol…
TCONS_00046824	1.89	1.62	2.1	0.76	0.31	0.28	0.17	0.13	287.4	133.91	292.54	102.85	24.54	53.16	22.9	21	2.83942	0.00143756	0.0138136	Alpk3	XP_012952695.1 PREDICTED: alpha-protein kinase 3 isoform X3 [Anas platyrhynchos]	-	-	-	-	GO:0043226//organelle;GO:0005623//cell;GO:0043229//intracellular organelle;GO:0005622//intracellular;GO:0043231//intracellular membrane-bounded organelle;GO:0043227//membrane-bounded organelle;GO:0044424//intracellular part;GO:0044464//cell part	GO:0016740//transferase activity;GO:0032550//purine ribonucleoside binding;GO:0032549//ribonucleoside binding;GO:1901363//heterocyclic compound binding;GO:0001883//purine nucleoside binding;GO:0097159//organic cyclic compound binding;GO:0001882//nucleoside binding;GO:0097367//carbohydrate derivative binding;GO:0003824//catalytic activity;GO:0005488//binding;GO:0036094//small molecule binding	GO:0044238//primary metabolic process;GO:0044237//cellular metabolic process;GO:0009987//cellular process;GO:0008152//metabolic process;GO:0044267//cellular protein metabolic process;GO:0019538//protein metabolic process;GO:0036211//protein modification process;GO:0043412//macromolecule modification;GO:0043170//macromolecule metabolic process;GO:0044260//cellular macromolecule metabolic process;G…
TCONS_00046825	1.92	1.06	2.87	0.56	0.08	0.16	0.05	0	243.6	73.09	333.46	63.15	5.46	25.84	5.1	0	4.4662	0.000360983	0.0437899	ALPK3	XP_012952695.1 PREDICTED: alpha-protein kinase 3 isoform X3 [Anas platyrhynchos]	-	-	-	-	GO:0043227//membrane-bounded organelle;GO:0043226//organelle;GO:0043231//intracellular membrane-bounded organelle;GO:0005622//intracellular;GO:0043229//intracellular organelle;GO:0044424//intracellular part;GO:0044464//cell part;GO:0005623//cell	GO:0001883//purine nucleoside binding;GO:0003824//catalytic activity;GO:0032550//purine ribonucleoside binding;GO:0097367//carbohydrate derivative binding;GO:0016740//transferase activity;GO:0032549//ribonucleoside binding;GO:1901363//heterocyclic compound binding;GO:0097159//organic cyclic compound binding;GO:0001882//nucleoside binding;GO:0005488//binding;GO:0036094//small molecule binding	GO:0008152//metabolic process;GO:0044699//single-organism process;GO:0044767//single-organism developmental process;GO:0036211//protein modification process;GO:0044267//cellular protein metabolic process;GO:0032502//developmental process;GO:0009987//cellular process;GO:0044260//cellular macromolecule metabolic process;GO:0006464//cellular protein modification process;GO:0044237//cellular metaboli…
TCONS_00046874	0	0.64	0.51	0.42	0	0	0	0	0	88.9	119.39	95.11	0	0	0	0	8.61655	0.000143964	0.0272154	Myo9a	XP_012952678.1 PREDICTED: LOW QUALITY PROTEIN: unconventional myosin-IXa [Anas platyrhynchos]	-	-	-	-	GO:0043228//non-membrane-bounded organelle;GO:0005622//intracellular;GO:0005856//cytoskeleton;GO:0044464//cell part;GO:0043226//organelle;GO:0043229//intracellular organelle;GO:0005623//cell;GO:0015629//actin cytoskeleton;GO:0043232//intracellular non-membrane-bounded organelle;GO:0044424//intracellular part	GO:1901363//heterocyclic compound binding;GO:0016462//pyrophosphatase activity;GO:0016787//hydrolase activity;GO:0017111//nucleoside-triphosphatase activity;GO:0008047//enzyme activator activity;GO:0001883//purine nucleoside binding;GO:0043169//cation binding;GO:0003824//catalytic activity;GO:0030234//enzyme regulator activity;GO:0005488//binding;GO:0036094//small molecule binding;GO:0016818//hyd…	GO:0051336//regulation of hydrolase activity;GO:0050790//regulation of catalytic activity;GO:0065009//regulation of molecular function;GO:0050789//regulation of biological process;GO:0065007//biological regulation;GO:0019222//regulation of metabolic process;GO:0043087//regulation of GTPase activity
TCONS_00047032	59.2	57.18	59.7	53.69	11.35	19.87	21.02	52.68	6338.73	3327.92	5847.51	5125.8	632.03	2683.69	1957.67	5982.88	1.1309	0.00736819	0.124853	PSMA4	ACH43886.1 putative proteasome subunit alpha type 4 [Taeniopygia guttata]	Genetic Information Processing	Folding, sorting and degradation	ko03050//Proteasome	K02728	GO:0035770//ribonucleoprotein granule;GO:0043232//intracellular non-membrane-bounded organelle;GO:0031988//membrane-bounded vesicle;GO:0036464//cytoplasmic ribonucleoprotein granule;GO:0032991//macromolecular complex;GO:0044444//cytoplasmic part;GO:0043227//membrane-bounded organelle;GO:0044464//cell part;GO:0005623//cell;GO:1990904//ribonucleoprotein complex;GO:0044424//intracellular part;GO:004…	GO:0003824//catalytic activity;GO:0016787//hydrolase activity;GO:0070011//peptidase activity, acting on L-amino acid peptides;GO:0008233//peptidase activity;GO:0004175//endopeptidase activity	GO:0044257//cellular protein catabolic process;GO:1901575//organic substance catabolic process;GO:0019538//protein metabolic process;GO:0043170//macromolecule metabolic process;GO:0044265//cellular macromolecule catabolic process;GO:0043632//modification-dependent macromolecule catabolic process;GO:0044237//cellular metabolic process;GO:0044267//cellular protein metabolic process;GO:0009057//macr…
TCONS_00047162	0	0	0	0	3.56	0.47	0.47	0.7	0	0	0	0	61.76	19.71	13.54	24.76	-10.3443	0.000580489	0.0328803	HSDL1	XP_005025785.1 PREDICTED: inactive hydroxysteroid dehydrogenase-like protein 1 [Anas platyrhynchos]	-	-	-	-	GO:0044424//intracellular part;GO:0043227//membrane-bounded organelle;GO:0043226//organelle;GO:0005623//cell;GO:0005622//intracellular;GO:0043231//intracellular membrane-bounded organelle;GO:0043229//intracellular organelle;GO:0044464//cell part	GO:0003824//catalytic activity	GO:1901360//organic cyclic compound metabolic process;GO:0008202//steroid metabolic process;GO:0008152//metabolic process;GO:0044710//single-organism metabolic process;GO:0071704//organic substance metabolic process;GO:0044238//primary metabolic process;GO:0044699//single-organism process;GO:0006629//lipid metabolic process
TCONS_00047201	0.94	0	0.46	1.4	0	0	0	0	38.31	0	17.11	51.05	0	0	0	0	9.45121	0.00512447	0.0566446	ZNRF1	XP_009568269.1 PREDICTED: E3 ubiquitin-protein ligase ZNRF1 [Cuculus canorus]	-	-	-	-	GO:0044444//cytoplasmic part;GO:0005737//cytoplasm;GO:0005622//intracellular;GO:0044424//intracellular part;GO:0005623//cell;GO:0044464//cell part	GO:0043167//ion binding;GO:0005488//binding;GO:0046914//transition metal ion binding;GO:0043169//cation binding;GO:0046872//metal ion binding	GO:0044260//cellular macromolecule metabolic process;GO:0006508//proteolysis;GO:0043632//modification-dependent macromolecule catabolic process;GO:0009987//cellular process;GO:0019941//modification-dependent protein catabolic process;GO:0043412//macromolecule modification;GO:0032446//protein modification by small protein conjugation;GO:0036211//protein modification process;GO:0071704//organic sub…
TCONS_00047286	0	0	0	0	0	0	2.42	0	0	0	0	0	0	0	352.9	0	-9.24079	0.00680314	0.355918	PSKH1	XP_005489945.1 PREDICTED: serine/threonine-protein kinase H1 [Zonotrichia albicollis]	-	-	-	-	-	GO:1901363//heterocyclic compound binding;GO:0005488//binding;GO:0032550//purine ribonucleoside binding;GO:0016301//kinase activity;GO:0003824//catalytic activity;GO:0004672//protein kinase activity;GO:0097367//carbohydrate derivative binding;GO:0036094//small molecule binding;GO:0032549//ribonucleoside binding;GO:0001883//purine nucleoside binding;GO:0016772//transferase activity, transferring p…	GO:0036211//protein modification process;GO:0043170//macromolecule metabolic process;GO:0006793//phosphorus metabolic process;GO:0009987//cellular process;GO:0044267//cellular protein metabolic process;GO:0019538//protein metabolic process;GO:0008152//metabolic process;GO:0044237//cellular metabolic process;GO:0071704//organic substance metabolic process;GO:0006464//cellular protein modification …
TCONS_00047537	0	6.94	0	3.21	0	0	0	0	0	342.32	0	260.06	0	0	0	0	11.3092	0.000173385	0.139918	ALDH1A2	XP_005011993.1 PREDICTED: retinal dehydrogenase 2 [Anas platyrhynchos]	Metabolism	Global and overview maps;Metabolism of cofactors and vitamins	ko01100//Metabolic pathways;ko00830//Retinol metabolism	K07249	GO:0044464//cell part;GO:0044424//intracellular part;GO:0005622//intracellular;GO:0005623//cell	GO:0016903//oxidoreductase activity, acting on the aldehyde or oxo group of donors;GO:0003824//catalytic activity;GO:0016620//oxidoreductase activity, acting on the aldehyde or oxo group of donors, NAD or NADP as acceptor;GO:0016491//oxidoreductase activity	GO:0048598//embryonic morphogenesis;GO:0010941//regulation of cell death;GO:0007275//multicellular organism development;GO:0044710//single-organism metabolic process;GO:0060429//epithelium development;GO:0008152//metabolic process;GO:0035113//embryonic appendage morphogenesis;GO:0044283//small molecule biosynthetic process;GO:0003002//regionalization;GO:0042221//response to chemical;GO:0032526//r…
TCONS_00047602	0	0	0	0	3.42	7.77	1.98	2.3	0	0	0	0	145.09	799.83	140.5	198.91	-11.9172	5.06e-12	0.0917747	Rab27a	XP_005011968.1 PREDICTED: ras-related protein Rab-27A [Anas platyrhynchos]	-	-	-	-	-	-	-
TCONS_00047641	3.47	4.99	3.67	1.91	11.81	4.32	9.38	9.99	758.78	592.87	734.49	372.72	1343.51	1190.92	1784.49	2317.73	-1.33828	0.00249672	0.00802155	MYO5A	XP_015728315.1 PREDICTED: unconventional myosin-Va isoform X4 [Coturnix japonica]	-	-	-	-	-	-	-
TCONS_00047643	1.83	3.46	2.88	2.5	8.77	3.43	5.93	6.71	396.5	407.25	571.58	482.46	988.99	938.13	1118.35	1541.66	-1.2191	0.00525717	0.00307321	MYO5A	XP_009468429.1 PREDICTED: LOW QUALITY PROTEIN: unconventional myosin-Va [Nipponia nippon]	-	-	-	-	-	-	-
TCONS_00047650	43.32	50.24	38.25	38.88	97.75	91.33	73.63	113.25	1267.13	798.87	1023.42	1014.11	1487.61	3370.1	1873.39	3513.79	-1.1392	0.000916588	0.0263221	NR13	XP_014729608.1 PREDICTED: bcl-2-like protein 10 isoform X1 [Sturnus vulgaris]	-	-	-	-	GO:0031224//intrinsic component of membrane;GO:0044425//membrane part;GO:0016020//membrane	-	GO:0012501//programmed cell death;GO:0006915//apoptotic process;GO:0016265//death;GO:0044763//single-organism cellular process;GO:0009987//cellular process;GO:0044699//single-organism process;GO:0008219//cell death
TCONS_00049142	0	0	0	0	0	0	3.22	0	0	0	0	0	0	0	288.2	0	-9.65284	0.00976197	0.355918	PRICKLE2	XP_013035790.1 PREDICTED: prickle-like protein 2 isoform X1 [Anser cygnoides domesticus]	Environmental Information Processing	Signal transduction	ko04310//Wnt signaling pathway	K04511	GO:0016020//membrane;GO:0071944//cell periphery;GO:0044464//cell part;GO:0044425//membrane part;GO:0005623//cell;GO:0005886//plasma membrane;GO:0044459//plasma membrane part	GO:0046914//transition metal ion binding;GO:0005488//binding;GO:0046872//metal ion binding;GO:0043167//ion binding;GO:0043169//cation binding	GO:0030030//cell projection organization;GO:0044699//single-organism process;GO:0016043//cellular component organization;GO:0009987//cellular process;GO:0061245//establishment or maintenance of bipolar cell polarity;GO:0071840//cellular component organization or biogenesis;GO:0007163//establishment or maintenance of cell polarity;GO:0035088//establishment or maintenance of apical/basal cell polar…
TCONS_00049589	0	0	0	0	0	0.16	0.52	0	0	0	0	0	0	57.25	128.46	0	-7.40939	0.00719959	0.178689	Celsr3	XP_011571804.1 PREDICTED: cadherin EGF LAG seven-pass G-type receptor 3 [Aquila chrysaetos canadensis]	-	-	-	-	GO:0016020//membrane	-	-
TCONS_00049676	0	0	0	0	0.34	0.06	0.17	0.18	0	0	0	0	45.35	19.02	38.18	48.21	-7.55075	0.0002231	0.00122008	PLXNB1	XP_005026038.1 PREDICTED: plexin-B1 [Anas platyrhynchos]	Organismal Systems	Development	ko04360//Axon guidance	K06821	GO:0044425//membrane part;GO:0005623//cell;GO:0016020//membrane;GO:0031224//intrinsic component of membrane;GO:0044464//cell part	GO:0005488//binding;GO:0060089//molecular transducer activity;GO:0005515//protein binding	GO:0044763//single-organism cellular process;GO:0016043//cellular component organization;GO:0032990//cell part morphogenesis;GO:0044699//single-organism process;GO:0008285//negative regulation of cell proliferation;GO:0022604//regulation of cell morphogenesis;GO:0033043//regulation of organelle organization;GO:0009966//regulation of signal transduction;GO:0007154//cell communication;GO:0014066//r…
TCONS_00049787	12.42	6.49	4.87	14.06	0.29	0.07	1.04	1.1	1145.49	325.41	411.16	1156.18	13.89	7.76	83.08	107.35	3.91991	1.23e-06	0.0211301	CNTN4	EOB01093.1 Contactin-4, partial [Anas platyrhynchos]	-	-	-	-	-	-	GO:0048519//negative regulation of biological process;GO:0065007//biological regulation;GO:0048523//negative regulation of cellular process;GO:0050793//regulation of developmental process;GO:0051093//negative regulation of developmental process;GO:0050789//regulation of biological process;GO:0045595//regulation of cell differentiation;GO:0045596//negative regulation of cell differentiation;GO:005…
TCONS_00049848	0	0	0	0	0.86	0.54	0	1.69	0	0	0	0	36.94	56.29	0	147.97	-9.59339	0.000817784	0.103819	PPP4R2	NP_001006142.1 serine/threonine-protein phosphatase 4 regulatory subunit 2 [Gallus gallus]	-	-	-	-	-	-	-
TCONS_00050540	0	1.57	0.23	0.33	0	0	0	0	0	88.24	21.3	30.69	0	0	0	0	9.05664	0.00171641	0.112316	Zxdc	KFQ49058.1 Zinc finger protein ZXDC, partial [Nestor notabilis]	-	-	-	-	-	GO:0043169//cation binding;GO:0043167//ion binding;GO:0005488//binding	-
TCONS_00051661	0.01	0	12.92	0.01	0	0	0	0	0.37	0.13	699.43	0.54	0.03	0.31	0.04	0.04	11.6595	0.000471605	0.355301	ANXA6	XP_009890897.1 PREDICTED: annexin A6 isoform X1 [Charadrius vociferus]	-	-	-	-	-	-	-
TCONS_00051852	0	35.3	0	0	0	0	0	0	0	367.87	0	0	0	0	0	0	13.1074	0.00354676	0.355918	cystm1	XP_012956368.1 PREDICTED: cysteine-rich and transmembrane domain-containing protein 1 isoform X4 [Anas platyrhynchos]	-	-	-	-	-	-	-
TCONS_00052445	0	0	0	0	2.15	0	0	0	0	0	0	0	237.54	0	0	0.04	-9.07012	0.00729827	0.355817	MARF1	XP_012953888.1 PREDICTED: meiosis arrest female protein 1 isoform X2 [Anas platyrhynchos]	-	-	-	-	GO:0043227//membrane-bounded organelle;GO:0043226//organelle;GO:0043231//intracellular membrane-bounded organelle;GO:0044444//cytoplasmic part;GO:0005737//cytoplasm;GO:0042579//microbody;GO:0005623//cell;GO:0005622//intracellular;GO:0044464//cell part;GO:0043229//intracellular organelle;GO:0044424//intracellular part	GO:0097159//organic cyclic compound binding;GO:0005488//binding	GO:0009987//cellular process;GO:0007126//meiotic nuclear division;GO:0006950//response to stress;GO:1902589//single-organism organelle organization;GO:0043170//macromolecule metabolic process;GO:0019953//sexual reproduction;GO:0006725//cellular aromatic compound metabolic process;GO:0050794//regulation of cellular process;GO:0044238//primary metabolic process;GO:0044767//single-organism developme…
TCONS_00054568	0	0	0	0	0	0.69	0	0.18	0	0	0	0	0	246	0	55.35	-7.76487	0.00439738	0.244271	SPECC1L	XP_005023615.1 PREDICTED: cytospin-A isoform X2 [Anas platyrhynchos]	-	-	-	-	GO:0032991//macromolecular complex;GO:0043229//intracellular organelle;GO:0043234//protein complex;GO:0043228//non-membrane-bounded organelle;GO:0005622//intracellular;GO:0005856//cytoskeleton;GO:0044464//cell part;GO:0005623//cell;GO:0044424//intracellular part;GO:0043226//organelle;GO:0043232//intracellular non-membrane-bounded organelle	-	GO:0032886//regulation of microtubule-based process;GO:0031111//negative regulation of microtubule polymerization or depolymerization;GO:0032970//regulation of actin filament-based process;GO:0009987//cellular process;GO:0006928//movement of cell or subcellular component;GO:0030832//regulation of actin filament length;GO:0043244//regulation of protein complex disassembly;GO:0071840//cellular comp…
TCONS_00054592	0	0	0	0	0.5	1.2	1.7	0	0	0	0	0	25.44	149.31	145.59	0	-9.73132	0.000336648	0.087371	SLC5A1	EOA96279.1 Sodium/glucose cotransporter 1, partial [Anas platyrhynchos]	Organismal Systems	Digestive system	ko04976//Bile secretion;ko04973//Carbohydrate digestion and absorption;ko04978//Mineral absorption	K14158	GO:0044425//membrane part;GO:0031224//intrinsic component of membrane;GO:0016020//membrane	-	GO:0051234//establishment of localization;GO:0051179//localization;GO:0044763//single-organism cellular process;GO:0044699//single-organism process;GO:0009987//cellular process
TCONS_00054739	2.67	0	0	0.37	0	0	0	0	306.46	0	0	38.01	0	0	0	0	9.56986	0.00234065	0.288658	FBXO21	EOA95981.1 F-box only protein 21, partial [Anas platyrhynchos]	-	-	-	-	-	-	-
TCONS_00054741	0	0	0	0	7.62	4.22	3.96	0	0	0	0	0	449.62	604.21	390	0	-11.9476	4.52e-08	0.030802	FBXO21	EOA95981.1 F-box only protein 21, partial [Anas platyrhynchos]	-	-	-	-	-	-	-
TCONS_00055291	3.71	5.05	4.16	6.01	0.59	0.29	0.61	0	160.04	118.47	164.41	231.42	13.14	15.74	22.76	0	3.66729	0.00148203	0.000616311	Clec2d	XP_013026070.1 PREDICTED: C-type lectin domain family 2 member D-like [Anser cygnoides domesticus]	-	-	-	-	-	-	-
TCONS_00055800	11.85	9.8	12.09	16.81	5.22	3.05	4.83	3.23	714.56	321.09	667.07	903.57	163.71	232.34	253.39	206.83	1.63019	0.00133615	0.0119498	cuta	XP_011577906.1 PREDICTED: protein CutA [Aquila chrysaetos canadensis]	-	-	-	-	GO:0043226//organelle;GO:0043227//membrane-bounded organelle;GO:0031988//membrane-bounded vesicle;GO:0031982//vesicle	GO:0005515//protein binding;GO:0005488//binding	GO:0050896//response to stimulus;GO:0042221//response to chemical;GO:0010035//response to inorganic substance
TCONS_00057245	3.78	1.45	1.41	1.1	8.59	3.52	6.96	21.04	362.79	75.79	124.04	94.06	428.59	425.94	580.61	2138.98	-2.37356	0.000243614	0.134712	Pecam1	XP_005012355.2 PREDICTED: platelet endothelial cell adhesion molecule isoform X2 [Anas platyrhynchos]	Environmental Information Processing;Organismal Systems;Human Diseases	Infectious diseases;Cardiovascular diseases;Immune system;Signaling molecules and interaction	ko04514//Cell adhesion molecules (CAMs);ko05418//Fluid shear stress and atherosclerosis;ko04670//Leukocyte transendothelial migration;ko05144//Malaria	K06471	GO:0043292//contractile fiber;GO:0071944//cell periphery;GO:0005737//cytoplasm;GO:0043226//organelle;GO:0098589//membrane region;GO:0016020//membrane;GO:0005886//plasma membrane;GO:0044464//cell part;GO:0005623//cell;GO:0044444//cytoplasmic part;GO:0098805//whole membrane;GO:0043228//non-membrane-bounded organelle;GO:0005622//intracellular;GO:0044424//intracellular part;GO:0044459//plasma membran…	-	GO:0044700//single organism signaling;GO:0042522//regulation of tyrosine phosphorylation of Stat5 protein;GO:0023051//regulation of signaling;GO:0065007//biological regulation;GO:0051674//localization of cell;GO:0051179//localization;GO:0019222//regulation of metabolic process;GO:0051716//cellular response to stimulus;GO:0010646//regulation of cell communication;GO:0009987//cellular process;GO:00…
TCONS_00057580	0	0	0	0	0.4	0.29	0.1	0.21	0	0	0	0	11.16	19.38	4.48	11.69	-7.96578	0.00780375	0.00863266	dus3l	XP_005029270.1 PREDICTED: tRNA-dihydrouridine(47) synthase [NAD(P)(+)]-like, partial [Anas platyrhynchos]	-	-	-	-	-	-	-
TCONS_00057652	0	0	0	0	0	0	1.26	1.67	0	0	0	0	0	0	86.14	139.38	-9.51668	0.00467009	0.151508	MBD3	XP_005142087.1 PREDICTED: methyl-CpG-binding domain protein 3 [Melopsittacus undulatus]	-	-	-	-	-	-	-
TCONS_00058034	0.1	0.19	0.23	0.12	0	0	0	0	9.44	9.59	18.93	9.57	0	0	0	0	7.32193	0.00571827	0.00231601	Smtnl2	XP_013048925.1 PREDICTED: smoothelin-like protein 2 isoform X1 [Anser cygnoides domesticus]	-	-	-	-	-	-	-
TCONS_00058909	0	0	0	0	5.44	0	0	0	0	0	0	0	381.52	0	0	0	-10.4094	0.00307051	0.355918	KSR1	XP_015151347.1 PREDICTED: kinase suppressor of Ras 1 isoform X2 [Gallus gallus]	Organismal Systems;Human Diseases;Environmental Information Processing	Infectious diseases;Immune system;Signal transduction	ko04014//Ras signaling pathway;ko05152//Tuberculosis;ko04625//C-type lectin receptor signaling pathway	K14958	-	GO:0016301//kinase activity;GO:0001883//purine nucleoside binding;GO:0043169//cation binding;GO:0005515//protein binding;GO:0005488//binding;GO:0016772//transferase activity, transferring phosphorus-containing groups;GO:1901363//heterocyclic compound binding;GO:0019900//kinase binding;GO:0036094//small molecule binding;GO:0003824//catalytic activity;GO:0016773//phosphotransferase activity, alcoho…	GO:0048518//positive regulation of biological process;GO:0044260//cellular macromolecule metabolic process;GO:0050896//response to stimulus;GO:0007154//cell communication;GO:0065007//biological regulation;GO:0042327//positive regulation of phosphorylation;GO:0010562//positive regulation of phosphorus metabolic process;GO:0008152//metabolic process;GO:0009987//cellular process;GO:0048522//positive…
TCONS_00059416	0	7.22	0	2.02	0	0	0	0	0	1096.16	0	502.52	0	0	0	0	11.1737	1.02e-05	0.176054	PREX1	XP_005016448.1 PREDICTED: phosphatidylinositol 3,4,5-trisphosphate-dependent Rac exchanger 1 protein isoform X2 [Anas platyrhynchos]	Human Diseases;Organismal Systems	Immune system;Infectious diseases	ko05167//Kaposi sarcoma-associated herpesvirus infection;ko04062//Chemokine signaling pathway	K12365	GO:0044424//intracellular part;GO:0043227//membrane-bounded organelle;GO:0005737//cytoplasm;GO:0044444//cytoplasmic part;GO:0005622//intracellular;GO:0005623//cell;GO:0044464//cell part;GO:0043226//organelle	GO:0005488//binding;GO:0008289//lipid binding	GO:0048856//anatomical structure development;GO:0006928//movement of cell or subcellular component;GO:0022610//biological adhesion;GO:0048870//cell motility;GO:0070887//cellular response to chemical stimulus;GO:0044767//single-organism developmental process;GO:0007166//cell surface receptor signaling pathway;GO:0007155//cell adhesion;GO:0097529//myeloid leukocyte migration;GO:0071621//granulocyte…
TCONS_00059919	0	0	0	0	0	0	1.26	0	0	0	0	0	0	0	320.73	0	-8.29921	0.0081337	0.355918	Helz2	XP_005028069.2 PREDICTED: helicase with zinc finger domain 2 isoform X1 [Anas platyrhynchos]	-	-	-	-	-	GO:0097159//organic cyclic compound binding;GO:0043167//ion binding;GO:0000988//transcription factor activity, protein binding;GO:1901363//heterocyclic compound binding;GO:0003676//nucleic acid binding;GO:0001883//purine nucleoside binding;GO:0001882//nucleoside binding;GO:0036094//small molecule binding;GO:0000989//transcription factor activity, transcription factor binding;GO:0003712//transcrip…	GO:0051252//regulation of RNA metabolic process;GO:0006357//regulation of transcription from RNA polymerase II promoter;GO:0031326//regulation of cellular biosynthetic process;GO:2001141//regulation of RNA biosynthetic process;GO:0010556//regulation of macromolecule biosynthetic process;GO:0031323//regulation of cellular metabolic process;GO:0051171//regulation of nitrogen compound metabolic proc…
TCONS_00060694	0	0	0	0	0	0	0.03	4.08	0.01	0.04	0	0	0	0	5.16	797.79	-10.0049	0.000587095	0.352113	DNAJC5	NP_001264937.1 dnaJ homolog subfamily C member 5 [Gallus gallus]	Genetic Information Processing	Folding, sorting and degradation	ko04141//Protein processing in endoplasmic reticulum	K09525	GO:0044446//intracellular organelle part;GO:0043229//intracellular organelle;GO:0044422//organelle part;GO:0043231//intracellular membrane-bounded organelle;GO:0031090//organelle membrane;GO:0005773//vacuole;GO:0098805//whole membrane;GO:0044424//intracellular part;GO:0005623//cell;GO:0005737//cytoplasm;GO:0043227//membrane-bounded organelle;GO:0005622//intracellular;GO:0044444//cytoplasmic part;…	-	GO:0050794//regulation of cellular process;GO:0043067//regulation of programmed cell death;GO:0065007//biological regulation;GO:0048519//negative regulation of biological process;GO:0010941//regulation of cell death;GO:0043066//negative regulation of apoptotic process;GO:0048523//negative regulation of cellular process;GO:0043069//negative regulation of programmed cell death;GO:0050789//regulatio…
TCONS_00060860	0	0	0.03	0	2.44	1.98	1.61	1.64	0	0	1.09	0	55.28	108.46	60.9	75.63	-7.99812	2.53e-05	0.000765761	SLC35C2	XP_014109560.1 PREDICTED: solute carrier family 35 member C2 isoform X2 [Pseudopodoces humilis]	-	-	-	-	GO:0005623//cell;GO:0043226//organelle;GO:0031224//intrinsic component of membrane;GO:0044425//membrane part;GO:0005622//intracellular;GO:0044424//intracellular part;GO:0016020//membrane;GO:0043231//intracellular membrane-bounded organelle;GO:0043227//membrane-bounded organelle;GO:0043229//intracellular organelle;GO:0044464//cell part	-	GO:1901576//organic substance biosynthetic process;GO:0005975//carbohydrate metabolic process;GO:0034645//cellular macromolecule biosynthetic process;GO:0009966//regulation of signal transduction;GO:0043412//macromolecule modification;GO:0044238//primary metabolic process;GO:0044710//single-organism metabolic process;GO:0006486//protein glycosylation;GO:0009101//glycoprotein biosynthetic process;…
TCONS_00061113	0	0	0	0	0	0	1.99	0	0	0	0	0	0	0	371.75	0	-8.95855	0.00620414	0.355918	MTOR	XP_005021339.1 PREDICTED: serine/threonine-protein kinase mTOR isoform X2 [Anas platyrhynchos]	Cellular Processes;Environmental Information Processing;Organismal Systems;Human Diseases	Infectious diseases;Endocrine and metabolic diseases;Drug resistance;Aging;Cell growth and death;Immune system;Cancers;Endocrine system;Transport and catabolism;Environmental adaptation;Signal transduction	ko05200//Pathways in cancer;ko05165//Human papillomavirus infection;ko04151//PI3K-Akt signaling pathway;ko05205//Proteoglycans in cancer;ko04072//Phospholipase D signaling pathway;ko05163//Human cytomegalovirus infection;ko05206//MicroRNAs in cancer;ko05167//Kaposi sarcoma-associated herpesvirus infection;ko04714//Thermogenesis;ko04140//Autophagy - animal;ko05225//Hepatocellular carcinoma;ko04371…	K07203	GO:0097458//neuron part;GO:0043231//intracellular membrane-bounded organelle;GO:0044424//intracellular part;GO:0005774//vacuolar membrane;GO:0044451//nucleoplasm part;GO:0031974//membrane-enclosed lumen;GO:0098588//bounding membrane of organelle;GO:0044437//vacuolar part;GO:0005654//nucleoplasm;GO:0098805//whole membrane;GO:0038201//TOR complex;GO:0005634//nucleus;GO:0043005//neuron projection;GO…	GO:0001025//RNA polymerase III transcription factor binding;GO:0001016//RNA polymerase III regulatory region DNA binding;GO:0097367//carbohydrate derivative binding;GO:0000975//regulatory region DNA binding;GO:0005515//protein binding;GO:0001883//purine nucleoside binding;GO:0005488//binding;GO:0032549//ribonucleoside binding;GO:0003824//catalytic activity;GO:0001882//nucleoside binding;GO:003609…	GO:0030833//regulation of actin filament polymerization;GO:0031323//regulation of cellular metabolic process;GO:0010591//regulation of lamellipodium assembly;GO:0060341//regulation of cellular localization;GO:0009895//negative regulation of catabolic process;GO:0008361//regulation of cell size;GO:1903533//regulation of protein targeting;GO:0060491//regulation of cell projection assembly;GO:009006…
TCONS_00061132	0	1.46	0	0	0	0	0	0	0	212.15	0	0	0	0	0	0	8.51175	0.00964806	0.355918	Casz1	XP_012961333.1 PREDICTED: zinc finger protein castor homolog 1 isoform X4 [Anas platyrhynchos]	-	-	-	-	-	-	-
TCONS_00062018	0	0	0	0	9.12	0	0	0	0.02	0	0.01	0.01	535.66	0.01	0.01	0	-11.1548	0.00152557	0.355929	ADAM9	XP_005029527.1 PREDICTED: disintegrin and metalloproteinase domain-containing protein 9 isoform X1 [Anas platyrhynchos]	-	-	-	-	GO:0031224//intrinsic component of membrane;GO:0005924//cell-substrate adherens junction;GO:0071944//cell periphery;GO:0070161//anchoring junction;GO:0044421//extracellular region part;GO:0044459//plasma membrane part;GO:0044464//cell part;GO:0030054//cell junction;GO:0043227//membrane-bounded organelle;GO:0044425//membrane part;GO:0005886//plasma membrane;GO:0005623//cell;GO:0031988//membrane-bo…	GO:0070011//peptidase activity, acting on L-amino acid peptides;GO:0019899//enzyme binding;GO:0003824//catalytic activity;GO:0046872//metal ion binding;GO:0043169//cation binding;GO:0043167//ion binding;GO:0044877//macromolecular complex binding;GO:0019901//protein kinase binding;GO:0046914//transition metal ion binding;GO:0005515//protein binding;GO:0019904//protein domain specific binding;GO:00…	GO:0007167//enzyme linked receptor protein signaling pathway;GO:0044767//single-organism developmental process;GO:0051046//regulation of secretion;GO:0060429//epithelium development;GO:0006508//proteolysis;GO:0002274//myeloid leukocyte activation;GO:0009987//cellular process;GO:0030335//positive regulation of cell migration;GO:1901700//response to oxygen-containing compound;GO:0031331//positive r…
TCONS_00062142	0.61	0	0	2.83	0	0	0	0	72.46	0	0	301.09	0	0	0	0	9.74819	0.00142052	0.238238	XPO7	XP_005510928.1 PREDICTED: LOW QUALITY PROTEIN: exportin-7 [Columba livia]	-	-	-	-	GO:0043231//intracellular membrane-bounded organelle;GO:0043229//intracellular organelle;GO:0044424//intracellular part;GO:0098796//membrane protein complex;GO:0043226//organelle;GO:0032991//macromolecular complex;GO:0016021//integral component of membrane;GO:0044464//cell part;GO:0043234//protein complex;GO:0005622//intracellular;GO:0044425//membrane part;GO:0016020//membrane;GO:0005623//cell;GO…	GO:0031267//small GTPase binding;GO:0051020//GTPase binding;GO:0017016//Ras GTPase binding;GO:0019899//enzyme binding;GO:0005515//protein binding;GO:0005488//binding	GO:0046907//intracellular transport;GO:0015031//protein transport;GO:0034613//cellular protein localization;GO:0051234//establishment of localization;GO:0070727//cellular macromolecule localization;GO:0051649//establishment of localization in cell;GO:0008104//protein localization;GO:0051179//localization;GO:0045184//establishment of protein localization;GO:0071702//organic substance transport;GO:…
TCONS_00062417	0	0	0	0	1.75	0	1.42	0.53	0	0	0	0	37.93	0	51.23	23.15	-9.85331	0.00340226	0.0430231	DCBLD1	XP_011582625.1 PREDICTED: discoidin, CUB and LCCL domain-containing protein 1-like [Aquila chrysaetos canadensis]	-	-	-	-	-	-	-
TCONS_00063068	0	2.04	3.54	0	0	0	0	0	0	52.43	152.91	0	0	0	0	0.03	10.446	0.00460194	0.204294	oaf	EOA98619.1 Out at first protein-like protein, partial [Anas platyrhynchos]	-	-	-	-	-	-	-
TCONS_00063340	0.17	0	0.77	0	0	0	0	0	58	0	247.26	0	0	0	0	0	7.87652	0.00250321	0.240557	IGSF9B	XP_015739679.1 PREDICTED: protein turtle homolog B isoform X3 [Coturnix japonica]	-	-	-	-	-	-	-
TCONS_00063471	0	0	5.21	0	0	0	0	0	0	0	357.45	0	0	0	0	0	10.3471	0.007447	0.355918	ARCN1	XP_013042555.1 PREDICTED: coatomer subunit delta, partial [Anser cygnoides domesticus]	-	-	-	-	GO:0043227//membrane-bounded organelle;GO:0043229//intracellular organelle;GO:0048475//coated membrane;GO:0032991//macromolecular complex;GO:0098588//bounding membrane of organelle;GO:0030117//membrane coat;GO:0031090//organelle membrane;GO:0044444//cytoplasmic part;GO:0030659//cytoplasmic vesicle membrane;GO:0005623//cell;GO:0031988//membrane-bounded vesicle;GO:0044433//cytoplasmic vesicle part;…	GO:0097159//organic cyclic compound binding;GO:0003723//RNA binding;GO:0005488//binding;GO:1901363//heterocyclic compound binding;GO:0003676//nucleic acid binding	GO:1902578//single-organism localization;GO:0071702//organic substance transport;GO:0045184//establishment of protein localization;GO:0007610//behavior;GO:0006810//transport;GO:0051649//establishment of localization in cell;GO:0051641//cellular localization;GO:0051234//establishment of localization;GO:1902582//single-organism intracellular transport;GO:0007626//locomotory behavior;GO:0044765//sin…
TCONS_00063765	0	0	0	0	2.48	0	0	0	0	0	0	0	237.06	0	0	0	-9.27612	0.00732418	0.355918	WIZ	XP_011598795.1 PREDICTED: protein Wiz isoform X1 [Aquila chrysaetos canadensis]	-	-	-	-	-	-	-
TCONS_00063918	9.79	8.42	3.33	3.92	12.98	24.67	22.23	20.62	492.84	230.27	153.11	175.68	339.9	1565.67	972.85	1100.67	-1.66076	0.00106314	0.0326025	selenbp1-a	EOA98070.1 Selenium-binding protein 1-A, partial [Anas platyrhynchos]	-	-	-	-	-	-	-
TCONS_00064218	44.93	34.65	28.43	44.65	20.48	21.15	13.51	10.88	3609.29	1512.82	2089.11	3197.73	856.02	2143.67	943.74	927.31	1.20935	0.0011025	0.0527016	PRELP	KQL52029.1 prolargin [Amazona aestiva]	-	-	-	-	GO:0031982//vesicle;GO:0031988//membrane-bounded vesicle;GO:0043226//organelle;GO:0043227//membrane-bounded organelle;GO:0031012//extracellular matrix	-	GO:0032502//developmental process;GO:0044767//single-organism developmental process;GO:0007568//aging;GO:0044699//single-organism process
TCONS_00064450	20.07	24.52	14.45	21.65	48.2	15.94	40.01	77.68	2491.55	1654.31	1640.48	2396.33	3112.71	2495.49	4319.63	10227.9	-1.17213	0.00598798	0.144691	SLC41A1	XP_010176349.1 PREDICTED: solute carrier family 41 member 1 [Antrostomus carolinensis]	-	-	-	-	-	GO:0022857//transmembrane transporter activity;GO:0022891//substrate-specific transmembrane transporter activity;GO:0022892//substrate-specific transporter activity;GO:0005215//transporter activity;GO:0015075//ion transmembrane transporter activity	GO:0006812//cation transport;GO:0006811//ion transport;GO:1902578//single-organism localization;GO:0051234//establishment of localization;GO:0006810//transport;GO:0044699//single-organism process;GO:0044765//single-organism transport;GO:0051179//localization
TCONS_00064887	0	0	0	0	0	2.18	4.43	0	0	0	0	0	0	114.17	159.74	0	-10.6904	0.00329619	0.142769	PLCD3	XP_011593352.1 PREDICTED: 1-phosphatidylinositol 4,5-bisphosphate phosphodiesterase delta-3 isoform X2 [Aquila chrysaetos canadensis]	Human Diseases;Organismal Systems;Metabolism;Environmental Information Processing	Signal transduction;Carbohydrate metabolism;Endocrine system;Endocrine and metabolic diseases;Global and overview maps	ko01100//Metabolic pathways;ko04020//Calcium signaling pathway;ko04070//Phosphatidylinositol signaling system;ko04919//Thyroid hormone signaling pathway;ko00562//Inositol phosphate metabolism;ko04933//AGE-RAGE signaling pathway in diabetic complications	K05857	-	GO:0008081//phosphoric diester hydrolase activity;GO:0016787//hydrolase activity;GO:0042578//phosphoric ester hydrolase activity;GO:0016788//hydrolase activity, acting on ester bonds;GO:0003824//catalytic activity	GO:0050789//regulation of biological process;GO:0007154//cell communication;GO:0023052//signaling;GO:0050896//response to stimulus;GO:0044710//single-organism metabolic process;GO:0071704//organic substance metabolic process;GO:0009987//cellular process;GO:0044238//primary metabolic process;GO:0044763//single-organism cellular process;GO:0006629//lipid metabolic process;GO:0050794//regulation of …
TCONS_00064992	0	0	0	0	0	3.28	0	0	0	0	0	0	0	451.06	0	0	-9.67948	0.00855381	0.355918	ATP6V0A1	XP_009553687.1 PREDICTED: V-type proton ATPase 116 kDa subunit a isoform 1 isoform X4 [Cuculus canorus]	Human Diseases;Metabolism;Organismal Systems;Cellular Processes	Transport and catabolism;Immune diseases;Global and overview maps;Infectious diseases;Nervous system;Energy metabolism;Excretory system	ko01100//Metabolic pathways;ko05165//Human papillomavirus infection;ko05152//Tuberculosis;ko04145//Phagosome;ko04142//Lysosome;ko04721//Synaptic vesicle cycle;ko05120//Epithelial cell signaling in Helicobacter pylori infection;ko00190//Oxidative phosphorylation;ko05323//Rheumatoid arthritis;ko05110//Vibrio cholerae infection;ko04966//Collecting duct acid secretion	K02154	-	-	-
TCONS_00066073	0.2	0	0.39	0.11	0	0	0	0	24.29	0	43.2	11.89	0	0	0	0	7.45121	0.00954948	0.0751012	LAT2	XP_005027404.1 PREDICTED: linker for activation of T-cells family member 2 isoform X3 [Anas platyrhynchos]	-	-	-	-	GO:0016020//membrane;GO:0098589//membrane region;GO:0043226//organelle;GO:0043227//membrane-bounded organelle;GO:0031982//vesicle;GO:0044425//membrane part;GO:0098805//whole membrane;GO:0031988//membrane-bounded vesicle	GO:0005515//protein binding;GO:0019904//protein domain specific binding;GO:0005488//binding	GO:0045321//leukocyte activation;GO:0044700//single organism signaling;GO:0002684//positive regulation of immune system process;GO:0002757//immune response-activating signal transduction;GO:0002253//activation of immune response;GO:0007166//cell surface receptor signaling pathway;GO:0002764//immune response-regulating signaling pathway;GO:0002429//immune response-activating cell surface receptor …
TCONS_00066622	1.17	2.76	0.84	0.9	4.69	2.6	4.83	1.91	1082.08	1390	711.68	743.42	2264.02	3047.13	3899.62	1882.64	-1.30709	0.00488677	0.0092338	-	XP_009069274.1 PREDICTED: brain-specific angiogenesis inhibitor 3-like, partial [Acanthisitta chloris]	-	-	-	-	-	-	-
TCONS_00066921	0	0	1.05	3.29	0	0	0	0	0	0	127.96	391.15	0	0	0	0	10.0835	0.00054268	0.208885	Smarca2	XP_013054300.1 PREDICTED: LOW QUALITY PROTEIN: probable global transcription activator SNF2L2 [Anser cygnoides domesticus]	Organismal Systems;Human Diseases	Environmental adaptation;Cancers	ko04714//Thermogenesis;ko05225//Hepatocellular carcinoma	K11647	GO:0043231//intracellular membrane-bounded organelle;GO:0044428//nuclear part;GO:0032991//macromolecular complex;GO:0005634//nucleus;GO:0044446//intracellular organelle part;GO:0043229//intracellular organelle;GO:0044422//organelle part;GO:0043234//protein complex;GO:0043227//membrane-bounded organelle;GO:0070603//SWI/SNF superfamily-type complex;GO:0043226//organelle;GO:0090544//BAF-type complex…	GO:1901363//heterocyclic compound binding;GO:0016787//hydrolase activity;GO:0016817//hydrolase activity, acting on acid anhydrides;GO:0003824//catalytic activity;GO:0097159//organic cyclic compound binding;GO:0005488//binding	GO:0010556//regulation of macromolecule biosynthetic process;GO:0060255//regulation of macromolecule metabolic process;GO:0019219//regulation of nucleobase-containing compound metabolic process;GO:0019222//regulation of metabolic process;GO:1903506//regulation of nucleic acid-templated transcription;GO:0006355//regulation of transcription, DNA-templated;GO:0050789//regulation of biological proces…
TCONS_00066925	19.41	10.91	16.13	18.37	7.61	7.88	8.12	6.9	1565.74	478.44	1189.94	1320.67	319.43	801.38	569.83	590.2	1.08716	0.00619398	0.0660653	VLDLR	AEM23934.1 very low density lipoprotein receptor transcript variant 1 [Anas platyrhynchos]	-	-	-	-	GO:0016020//membrane;GO:0031224//intrinsic component of membrane;GO:0044425//membrane part;GO:0043234//protein complex;GO:0044421//extracellular region part;GO:0032991//macromolecular complex;GO:0005576//extracellular region	GO:0005488//binding;GO:0004871//signal transducer activity;GO:0043167//ion binding;GO:0043169//cation binding;GO:0060089//molecular transducer activity;GO:0008565//protein transporter activity;GO:0005515//protein binding;GO:0038023//signaling receptor activity;GO:0030228//lipoprotein particle receptor activity;GO:0004872//receptor activity;GO:0099600//transmembrane receptor activity;GO:0004888//t…	GO:0042325//regulation of phosphorylation;GO:0051239//regulation of multicellular organismal process;GO:0048699//generation of neurons;GO:0032270//positive regulation of cellular protein metabolic process;GO:0021510//spinal cord development;GO:0097006//regulation of plasma lipoprotein particle levels;GO:0051234//establishment of localization;GO:0010975//regulation of neuron projection development…
TCONS_00067050	9.59	20.83	5.52	10.77	50.94	32.88	45.07	30.93	1625.08	1918.07	855.7	1626.62	4490.38	7027.53	6641.43	5559.09	-1.77464	1.72e-05	0.000366222	ACER2	XP_009889822.1 PREDICTED: alkaline ceramidase 2 [Charadrius vociferus]	Environmental Information Processing;Metabolism	Global and overview maps;Lipid metabolism;Signal transduction	ko01100//Metabolic pathways;ko04071//Sphingolipid signaling pathway;ko00600//Sphingolipid metabolism	K01441	-	-	-
TCONS_00067197	0.44	0.6	0.3	0.27	2.59	4.88	1.85	2.89	21.97	16.16	13.74	12	67.06	306.49	80.14	152.53	-2.92293	0.00408525	0.048777	GADD45G	XP_011576195.1 PREDICTED: growth arrest and DNA damage-inducible protein GADD45 gamma [Aquila chrysaetos canadensis]	Cellular Processes;Environmental Information Processing;Human Diseases	Signal transduction;Cancers;Cell growth and death	ko05200//Pathways in cancer;ko04010//MAPK signaling pathway;ko05202//Transcriptional misregulation in cancers;ko05225//Hepatocellular carcinoma;ko05226//Gastric cancer;ko04218//Cellular senescence;ko05224//Breast cancer;ko04210//Apoptosis;ko04068//FoxO signaling pathway;ko04110//Cell cycle;ko04064//NF-kappa B signaling pathway;ko05222//Small cell lung cancer;ko05210//Colorectal cancer;ko05214//Gl…	K04402	GO:0005623//cell;GO:0044424//intracellular part;GO:0043227//membrane-bounded organelle;GO:0043231//intracellular membrane-bounded organelle;GO:0043226//organelle;GO:0044464//cell part;GO:0043229//intracellular organelle;GO:0005622//intracellular	-	GO:0048518//positive regulation of biological process;GO:0009987//cellular process;GO:0043067//regulation of programmed cell death;GO:0010563//negative regulation of phosphorus metabolic process;GO:0045860//positive regulation of protein kinase activity;GO:0051338//regulation of transferase activity;GO:0019220//regulation of phosphate metabolic process;GO:0023056//positive regulation of signaling…
TCONS_00067515	0.96	3.57	2.79	3.72	6.26	7.93	10.79	7.56	178.25	360.04	473.93	615.27	604.49	1858.53	1742.59	1489.09	-1.55947	0.000990237	0.0143632	BDP1	XP_012958673.1 PREDICTED: transcription factor TFIIIB component B'' homolog isoform X1 [Anas platyrhynchos]	-	-	-	-	-	-	-
TCONS_00067619	1.46	2.8	1.19	2.04	5.3	6.76	6.82	2.59	335.27	350.13	250.86	417.06	633.93	1959.99	1363.44	630.55	-1.51928	0.00142327	0.0462933	-	KFW80458.1 Uncharacterized protein KIAA1958, partial [Manacus vitellinus]	-	-	-	-	-	-	-
TCONS_00067647	3.63	7.46	3.93	4.7	11.73	12.84	11.3	8.23	319.3	356	315.9	368.51	536.3	1423	863.6	767.29	-1.16112	0.00944135	0.0253889	Atg10	XP_005010793.1 PREDICTED: ubiquitin-like-conjugating enzyme ATG10 [Anas platyrhynchos]	Cellular Processes	Transport and catabolism	ko04140//Autophagy - animal;ko04136//Autophagy - other eukaryotes	K17888	-	GO:0003824//catalytic activity;GO:0016740//transferase activity;GO:0019787//ubiquitin-like protein transferase activity	GO:0060255//regulation of macromolecule metabolic process;GO:0080090//regulation of primary metabolic process;GO:0043412//macromolecule modification;GO:0032268//regulation of cellular protein metabolic process;GO:0044260//cellular macromolecule metabolic process;GO:0065007//biological regulation;GO:0044267//cellular protein metabolic process;GO:0043170//macromolecule metabolic process;GO:0036211/…
TCONS_00067655	0	0	0	0	1.16	0	0.97	0	0	0	0	0	152.63	0	213.59	0	-9.05664	0.00081473	0.142778	VCAN	XP_012948783.1 PREDICTED: LOW QUALITY PROTEIN: versican core protein [Anas platyrhynchos]	Environmental Information Processing	Signaling molecules and interaction	ko04514//Cell adhesion molecules (CAMs)	K06793	-	-	-
TCONS_00067875	0	0	0	0	1.59	0	1.73	1.25	0	0	0	0	143.97	0	261.46	230.37	-10.158	5.18e-06	0.0348251	-	XP_009664440.1 PREDICTED: uncharacterized protein C18orf25 homolog isoform X2 [Struthio camelus australis]	-	-	-	-	-	-	-
TCONS_00067984	1.7	0	0	0.27	0	0	0	0	506.62	0	0	70.57	0	0	0	0	8.94398	0.000603248	0.281335	PDZD2	XP_013037101.1 PREDICTED: PDZ domain-containing protein 2 isoform X1 [Anser cygnoides domesticus]	-	-	-	-	-	-	-
TCONS_00067986	0.02	0.76	0	0	0	0	0	0	7.12	130.69	0	0	0	0.04	0	0	7.60733	0.00799305	0.324848	PDZD2	XP_013037101.1 PREDICTED: PDZ domain-containing protein 2 isoform X1 [Anser cygnoides domesticus]	-	-	-	-	-	-	-
TCONS_00068044	0	0	1.37	0	0	0	0	0	0	0	340.09	0	0	0	0	0	8.41996	0.00817742	0.355918	PRLR	XP_012952633.1 PREDICTED: prolactin receptor [Anas platyrhynchos]	Organismal Systems;Environmental Information Processing	Signaling molecules and interaction;Signal transduction;Endocrine system	ko04151//PI3K-Akt signaling pathway;ko04080//Neuroactive ligand-receptor interaction;ko04060//Cytokine-cytokine receptor interaction;ko04630//Jak-STAT signaling pathway;ko04917//Prolactin signaling pathway	K05081	GO:0016020//membrane;GO:0005623//cell;GO:0044425//membrane part;GO:0031224//intrinsic component of membrane;GO:0044464//cell part	GO:0004871//signal transducer activity;GO:0004872//receptor activity;GO:0042277//peptide binding;GO:0043167//ion binding;GO:0060089//molecular transducer activity;GO:0005488//binding;GO:0043169//cation binding;GO:0004888//transmembrane signaling receptor activity;GO:0099600//transmembrane receptor activity;GO:0033218//amide binding;GO:0038023//signaling receptor activity;GO:0004896//cytokine rece…	GO:0051247//positive regulation of protein metabolic process;GO:0010604//positive regulation of macromolecule metabolic process;GO:0032147//activation of protein kinase activity;GO:0050789//regulation of biological process;GO:0032870//cellular response to hormone stimulus;GO:0023052//signaling;GO:0050896//response to stimulus;GO:0050794//regulation of cellular process;GO:0019222//regulation of me…
TCONS_00068083	14.59	28.51	11.7	29.2	47.63	34.26	52.72	38.8	5043.39	5356.91	3700.1	9000.46	8565.51	14938.6	15850.5	14225	-1.04573	0.00445993	0.00880115	LIFR	XP_012948483.1 PREDICTED: leukemia inhibitory factor receptor [Anas platyrhynchos]	Cellular Processes;Environmental Information Processing	Cellular community - eukaryotes;Signal transduction;Signaling molecules and interaction	ko04060//Cytokine-cytokine receptor interaction;ko04550//Signaling pathways regulating pluripotency of stem cells;ko04630//Jak-STAT signaling pathway	K05058	-	-	-
TCONS_00069204	1.42	2.16	0.79	0.74	5.4	4.04	3.82	3.16	295.54	244.08	150.3	137.47	583.77	1058.91	691.26	696.7	-1.68406	0.00152558	0.00248382	RASGRF2	XP_013047232.1 PREDICTED: ras-specific guanine nucleotide-releasing factor 2 [Anser cygnoides domesticus]	Environmental Information Processing	Signal transduction	ko04010//MAPK signaling pathway;ko04014//Ras signaling pathway	K12326	GO:0044464//cell part;GO:0005623//cell	-	GO:0051336//regulation of hydrolase activity;GO:0019222//regulation of metabolic process;GO:0050790//regulation of catalytic activity;GO:0010469//regulation of receptor activity;GO:0009966//regulation of signal transduction;GO:0065009//regulation of molecular function;GO:0010646//regulation of cell communication;GO:0065007//biological regulation;GO:0023051//regulation of signaling;GO:0050789//reg…
TCONS_00069747	0	0	0	0	0	0	3.47	0	0	0	0	0	0	0	447.44	0	-9.76072	0.00446245	0.355918	-	XP_014812469.1 PREDICTED: myosin heavy chain, skeletal muscle, adult-like [Calidris pugnax]	Cellular Processes;Human Diseases;Organismal Systems	Cellular community - eukaryotes;Cell motility;Infectious diseases;Circulatory system	ko04810//Regulation of actin cytoskeleton;ko04270//Vascular smooth muscle contraction;ko04530//Tight junction;ko05132//Salmonella infection	K10352	GO:0005623//cell;GO:0044424//intracellular part;GO:0043229//intracellular organelle;GO:0005622//intracellular;GO:0005856//cytoskeleton;GO:0043226//organelle;GO:0043228//non-membrane-bounded organelle;GO:0043232//intracellular non-membrane-bounded organelle;GO:0044464//cell part;GO:0015629//actin cytoskeleton	GO:0032550//purine ribonucleoside binding;GO:0005515//protein binding;GO:0001882//nucleoside binding;GO:0032549//ribonucleoside binding;GO:0097159//organic cyclic compound binding;GO:0005488//binding;GO:0001883//purine nucleoside binding;GO:0097367//carbohydrate derivative binding;GO:0008092//cytoskeletal protein binding;GO:1901363//heterocyclic compound binding;GO:0036094//small molecule binding	-
TCONS_00069749	0	0	0	0	0	0	4.4	0	0	0	0	0	0	0	566.94	0	-10.1033	0.00284703	0.355918	-	XP_014812469.1 PREDICTED: myosin heavy chain, skeletal muscle, adult-like [Calidris pugnax]	Organismal Systems;Human Diseases;Cellular Processes	Cellular community - eukaryotes;Infectious diseases;Circulatory system;Cell motility	ko04810//Regulation of actin cytoskeleton;ko04270//Vascular smooth muscle contraction;ko04530//Tight junction;ko05132//Salmonella infection	K10352	GO:0044424//intracellular part;GO:0043229//intracellular organelle;GO:0015629//actin cytoskeleton;GO:0043226//organelle;GO:0005856//cytoskeleton;GO:0005623//cell;GO:0005622//intracellular;GO:0043228//non-membrane-bounded organelle;GO:0044464//cell part;GO:0043232//intracellular non-membrane-bounded organelle	GO:0008092//cytoskeletal protein binding;GO:0097159//organic cyclic compound binding;GO:0005515//protein binding;GO:0001882//nucleoside binding;GO:0032549//ribonucleoside binding;GO:0005488//binding;GO:0032550//purine ribonucleoside binding;GO:0036094//small molecule binding;GO:0001883//purine nucleoside binding;GO:1901363//heterocyclic compound binding;GO:0097367//carbohydrate derivative binding	-
TCONS_00070827	0.23	0.79	0	0.26	0	0	0	0	19.89	37.05	0	19.78	0	0	0	0	8.32193	0.00752408	0.0445038	Ccdc81	XP_013026376.1 PREDICTED: coiled-coil domain-containing protein 81-like [Anser cygnoides domesticus]	-	-	-	-	-	-	-
TCONS_00072024	0.54	0.85	0.75	0.49	0	0	0	0	65.79	55.73	83.4	53.18	0	0	0	0	9.36085	9.34e-06	8.17e-05	RICTOR	KFP27721.1 Rapamycin-insensitive companion of mTOR, partial [Colius striatus]	Environmental Information Processing	Signal transduction	ko04150//mTOR signaling pathway	K08267	-	-	-
TCONS_00073597	0.03	0.92	0.53	0.22	0	0	0	0.02	4.28	63.45	61.74	24.56	0	0	0	3.37	6.40939	0.00451457	0.0411737	MIER3	XP_013036029.1 PREDICTED: mesoderm induction early response protein 3 isoform X3 [Anser cygnoides domesticus]	-	-	-	-	GO:0044464//cell part;GO:0043227//membrane-bounded organelle;GO:0044424//intracellular part;GO:0005622//intracellular;GO:0005623//cell;GO:0043226//organelle;GO:0043229//intracellular organelle;GO:0043231//intracellular membrane-bounded organelle	GO:0005488//binding	-
TCONS_00073601	0.55	0.02	0	0.59	0	0	0	0	71.62	1.44	0	69.47	0	0	0	0.61	8.17991	0.00481492	0.128975	MIER3	XP_013036029.1 PREDICTED: mesoderm induction early response protein 3 isoform X3 [Anser cygnoides domesticus]	-	-	-	-	GO:0044464//cell part;GO:0043226//organelle;GO:0005623//cell;GO:0043229//intracellular organelle;GO:0044424//intracellular part;GO:0043231//intracellular membrane-bounded organelle;GO:0005622//intracellular;GO:0043227//membrane-bounded organelle	GO:0005488//binding	-
XM_005008899.4	5.88	4.64	4.52	5.12	15.53	17.35	14.19	30.28	219	94	154	170	301	815.69	460	1197	-1.93991	0.000309169	0.0376705	IYD	PREDICTED: iodotyrosine dehalogenase 1 isoform X1 [Anas platyrhynchos]	-	-	-	-	-	GO:0003824//catalytic activity	GO:0044699//single-organism process;GO:0044710//single-organism metabolic process;GO:0008152//metabolic process
XM_005009174.4	0	0	0	0	0	0	13.45	0	0.11	0.03	0.07	0.11	0.1	0.09	671.27	0.02	-11.7153	0.00115902	0.355944	PLEKHF2	PREDICTED: pleckstrin homology domain-containing family F member 2 [Anas platyrhynchos]	-	-	-	-	GO:0012505//endomembrane system;GO:0043229//intracellular organelle;GO:0005622//intracellular;GO:0005769//early endosome;GO:0005623//cell;GO:0044444//cytoplasmic part;GO:0043226//organelle;GO:0044464//cell part;GO:0043231//intracellular membrane-bounded organelle;GO:0043227//membrane-bounded organelle;GO:0005768//endosome;GO:0005737//cytoplasm;GO:0044424//intracellular part	GO:0043167//ion binding;GO:0005488//binding;GO:0043169//cation binding	GO:0051179//localization;GO:0008104//protein localization;GO:0051234//establishment of localization;GO:0033036//macromolecule localization
XM_005009311.4	28.24	27.82	15.2	31.13	46.03	58.95	51.93	65.11	1875	1004	923	1843	1590	4937	2999	4585	-1.11661	0.00156825	0.0405911	Adra1b	PREDICTED: alpha-1B adrenergic receptor [Anas platyrhynchos]	Environmental Information Processing;Organismal Systems	Digestive system;Signaling molecules and interaction;Signal transduction;Circulatory system	ko04080//Neuroactive ligand-receptor interaction;ko04020//Calcium signaling pathway;ko04022//cGMP - PKG signaling pathway;ko04270//Vascular smooth muscle contraction;ko04261//Adrenergic signaling in cardiomyocytes;ko04970//Salivary secretion	K04136	GO:0043231//intracellular membrane-bounded organelle;GO:0044424//intracellular part;GO:0016020//membrane;GO:0043227//membrane-bounded organelle;GO:0043229//intracellular organelle;GO:0044425//membrane part;GO:0005622//intracellular;GO:0044464//cell part;GO:0031224//intrinsic component of membrane;GO:0005623//cell;GO:0031090//organelle membrane;GO:0043226//organelle;GO:0044422//organelle part	GO:0046983//protein dimerization activity;GO:0008227//G-protein coupled amine receptor activity;GO:0004936//alpha-adrenergic receptor activity;GO:0004935//adrenergic receptor activity;GO:0038023//signaling receptor activity;GO:0099600//transmembrane receptor activity;GO:0004888//transmembrane signaling receptor activity;GO:0060089//molecular transducer activity;GO:0005488//binding;GO:0004872//rec…	GO:1901698//response to nitrogen compound;GO:0031325//positive regulation of cellular metabolic process;GO:0003008//system process;GO:0014072//response to isoquinoline alkaloid;GO:0010675//regulation of cellular carbohydrate metabolic process;GO:0010562//positive regulation of phosphorus metabolic process;GO:0007507//heart development;GO:0045823//positive regulation of heart contraction;GO:000763…
XM_005009581.4	0.38	0.66	1.3	0	0	0	0	0	34.54	32.52	107.61	0	0	0	0	0	9.19229	0.00144705	0.103175	TMEM200A	PREDICTED: transmembrane protein 200A [Anas platyrhynchos]	-	-	-	-	-	-	-
XM_005009775.4	12.76	6.46	9.05	17.75	4.62	4.58	2.59	0.82	691.93	190.34	448.71	858.02	130.44	312.98	122	47.06	1.86769	0.00510652	0.0451184	SCG5	PREDICTED: neuroendocrine protein 7B2 isoform X1 [Anas platyrhynchos]	-	-	-	-	GO:0012505//endomembrane system;GO:0005623//cell;GO:0044464//cell part	GO:0005515//protein binding;GO:0005488//binding	GO:0071702//organic substance transport;GO:0019538//protein metabolic process;GO:0007154//cell communication;GO:0071704//organic substance metabolic process;GO:0044238//primary metabolic process;GO:0007186//G-protein coupled receptor signaling pathway;GO:0051234//establishment of localization;GO:0023052//signaling;GO:0033036//macromolecule localization;GO:0044699//single-organism process;GO:00650…
XM_005010199.4	19.35	27.81	27.36	18.74	68.96	28.56	53.9	58.02	1011	790	1308	873	1875	1883	2450	3216	-1.16721	0.00234663	0.00677748	SNAI2	PREDICTED: zinc finger protein SNAI2 [Taeniopygia guttata]	Environmental Information Processing;Cellular Processes	Cellular community - eukaryotes;Signal transduction	ko04390//Hippo signaling pathway;ko04520//Adherens junction	K05706	GO:0043227//membrane-bounded organelle;GO:0043229//intracellular organelle;GO:0044422//organelle part;GO:0043231//intracellular membrane-bounded organelle;GO:0044424//intracellular part;GO:0043232//intracellular non-membrane-bounded organelle;GO:0005622//intracellular;GO:0005694//chromosome;GO:0044464//cell part;GO:0032991//macromolecular complex;GO:0044446//intracellular organelle part;GO:000562…	GO:1901363//heterocyclic compound binding;GO:0005515//protein binding;GO:0001071//nucleic acid binding transcription factor activity;GO:0003677//DNA binding;GO:0097159//organic cyclic compound binding;GO:0043169//cation binding;GO:0005488//binding;GO:0043167//ion binding;GO:0003676//nucleic acid binding;GO:0000981//RNA polymerase II transcription factor activity, sequence-specific DNA binding;GO:…	GO:0050793//regulation of developmental process;GO:0097191//extrinsic apoptotic signaling pathway;GO:0051055//negative regulation of lipid biosynthetic process;GO:0010033//response to organic substance;GO:0031399//regulation of protein modification process;GO:0097190//apoptotic signaling pathway;GO:0019218//regulation of steroid metabolic process;GO:0019216//regulation of lipid metabolic process;…
XM_005010200.4	0.57	0	0.17	0.09	4.28	2.2	1.88	2.43	22.04	0	6	3.23	85.72	106.75	62.82	99.24	-3.70044	0.00720954	0.000296315	PPDPFL	PREDICTED: pancreatic progenitor cell differentiation and proliferation factor-like protein [Anas platyrhynchos]	-	-	-	-	-	-	GO:0032502//developmental process;GO:0044699//single-organism process;GO:0044763//single-organism cellular process;GO:0048869//cellular developmental process;GO:0009987//cellular process;GO:0044767//single-organism developmental process
XM_005010497.4	1.93	0.82	45.53	2.09	1.59	0.41	0.75	0.65	56	13	1208	54	24	15	19	20	3.88896	0.00170883	0.324497	Mmp7	PREDICTED: matrilysin [Anas platyrhynchos]	Environmental Information Processing	Signal transduction	ko04310//Wnt signaling pathway	K01397	GO:0043227//membrane-bounded organelle;GO:0043226//organelle;GO:0031982//vesicle;GO:0031988//membrane-bounded vesicle	GO:0046914//transition metal ion binding;GO:0005488//binding;GO:0003824//catalytic activity;GO:0016787//hydrolase activity;GO:0004175//endopeptidase activity;GO:0008233//peptidase activity;GO:0046872//metal ion binding;GO:0043167//ion binding;GO:0043169//cation binding;GO:0070011//peptidase activity, acting on L-amino acid peptides	GO:0042221//response to chemical;GO:0008152//metabolic process;GO:0006950//response to stress;GO:0009987//cellular process;GO:1901564//organonitrogen compound metabolic process;GO:0044699//single-organism process;GO:0009617//response to bacterium;GO:0044707//single-multicellular organism process;GO:0032501//multicellular organismal process;GO:0042742//defense response to bacterium;GO:0044259//mul…
XM_005010769.4	1.02	0	0	0.78	0	0	0	0	91.1	0	0	62.06	0	0	0	0	8.81378	0.00984159	0.145365	ACOT9	PREDICTED: acyl-coenzyme A thioesterase 9, mitochondrial isoform X4 [Anas platyrhynchos]	-	-	-	-	-	-	-
XM_005012176.4	16.76	70.23	21.21	24.07	117.46	112.07	78.25	84.32	1042	2373	1206	1334	3799	8789	4231	5560	-1.56774	0.000435646	0.0125945	APOLD1	PREDICTED: apolipoprotein L domain-containing protein 1 [Anas platyrhynchos]	Human Diseases	Infectious diseases	ko05143//African trypanosomiasis	K14480	-	GO:0005488//binding	GO:0044238//primary metabolic process;GO:0051234//establishment of localization;GO:0043170//macromolecule metabolic process;GO:0044699//single-organism process;GO:0008152//metabolic process;GO:0051179//localization;GO:1902578//single-organism localization;GO:0044765//single-organism transport;GO:0071704//organic substance metabolic process;GO:0019538//protein metabolic process;GO:0006810//transpo…
XM_005012209.4	16.61	22.29	11.56	14.99	57.65	21.54	48.02	119.68	906	661	577	729	1636	1482	2278	6924	-1.9154	6.56e-05	0.117951	CYP2D20	PREDICTED: cytochrome P450 2D17 isoform X1 [Anas platyrhynchos]	Organismal Systems;Metabolism	Nervous system;Lipid metabolism	ko04726//Serotonergic synapse;ko00140//Steroid hormone biosynthesis	K07414	-	GO:0003824//catalytic activity;GO:0043167//ion binding;GO:0043169//cation binding;GO:0046906//tetrapyrrole binding;GO:1901363//heterocyclic compound binding;GO:0097159//organic cyclic compound binding;GO:0016491//oxidoreductase activity;GO:0046872//metal ion binding;GO:0004497//monooxygenase activity;GO:0005488//binding;GO:0046914//transition metal ion binding	GO:0008152//metabolic process;GO:0044699//single-organism process;GO:0044710//single-organism metabolic process
XM_005012288.4	0	1.75	0.57	0	0	0	0	0	0	97.31	52.74	0	0	0	0	0	9.17991	0.00625522	0.161406	ERN1	PREDICTED: serine/threonine-protein kinase/endoribonuclease IRE1 isoform X1 [Anas platyrhynchos]	Cellular Processes;Genetic Information Processing;Human Diseases	Neurodegenerative diseases;Folding, sorting and degradation;Cell growth and death;Transport and catabolism;Endocrine and metabolic diseases	ko04140//Autophagy - animal;ko05010//Alzheimer disease;ko04210//Apoptosis;ko04141//Protein processing in endoplasmic reticulum;ko04932//Non-alcoholic fatty liver disease (NAFLD)	K08852	GO:0005737//cytoplasm;GO:0031967//organelle envelope;GO:0044424//intracellular part;GO:0044425//membrane part;GO:0031975//envelope;GO:0005783//endoplasmic reticulum;GO:0044422//organelle part;GO:0005622//intracellular;GO:0031224//intrinsic component of membrane;GO:0019866//organelle inner membrane;GO:0031300//intrinsic component of organelle membrane;GO:0044446//intracellular organelle part;GO:00…	GO:0004519//endonuclease activity;GO:0005488//binding;GO:0001883//purine nucleoside binding;GO:0016740//transferase activity;GO:0004518//nuclease activity;GO:0016772//transferase activity, transferring phosphorus-containing groups;GO:1901363//heterocyclic compound binding;GO:0005515//protein binding;GO:0097159//organic cyclic compound binding;GO:0032549//ribonucleoside binding;GO:0016773//phospho…	GO:0006807//nitrogen compound metabolic process;GO:0010604//positive regulation of macromolecule metabolic process;GO:0048584//positive regulation of response to stimulus;GO:0048522//positive regulation of cellular process;GO:0010646//regulation of cell communication;GO:0032075//positive regulation of nuclease activity;GO:0044238//primary metabolic process;GO:0023051//regulation of signaling;GO:0…
XM_005012639.3	46.37	37.18	23.91	36.78	10.93	17.49	18.26	10.8	1223	533	577	865	150	582	419	302	1.32734	0.00373794	0.0550281	Cd9	PREDICTED: CD9 antigen [Anas platyrhynchos]	Organismal Systems	Immune system	ko04640//Hematopoietic cell lineage	K06460	GO:0016020//membrane;GO:0044421//extracellular region part;GO:0031988//membrane-bounded vesicle;GO:0031982//vesicle;GO:0044464//cell part;GO:0005924//cell-substrate adherens junction;GO:0005886//plasma membrane;GO:0044459//plasma membrane part;GO:0043226//organelle;GO:0071944//cell periphery;GO:0005912//adherens junction;GO:0031224//intrinsic component of membrane;GO:0005576//extracellular region…	-	GO:0007043//cell-cell junction assembly;GO:0032501//multicellular organismal process;GO:0022412//cellular process involved in reproduction in multicellular organism;GO:0044699//single-organism process;GO:0071840//cellular component organization or biogenesis;GO:0044763//single-organism cellular process;GO:0034329//cell junction assembly;GO:0000003//reproduction;GO:0044085//cellular component biog…
XM_005013193.4	16.68	8.08	4.36	8.92	28.54	17.59	19.63	35.3	992.12	261	237	473	883	1319.64	1015.11	2226.46	-1.40962	0.00315377	0.0472628	PHYHD1	PREDICTED: phytanoyl-CoA dioxygenase domain-containing protein 1 [Anas platyrhynchos]	-	-	-	-	-	-	-
XM_005013265.4	0.65	0.24	0	0.53	0	0	0	0	89.27	17.98	0	65	0	0	0	0	8.47168	0.00175164	0.0817271	ADAMTS13	PREDICTED: A disintegrin and metalloproteinase with thrombospondin motifs 13 isoform X2 [Anas platyrhynchos]	-	-	-	-	GO:0005576//extracellular region;GO:0031012//extracellular matrix;GO:0044421//extracellular region part	GO:0046914//transition metal ion binding;GO:0008233//peptidase activity;GO:0005488//binding;GO:0043169//cation binding;GO:0043167//ion binding;GO:0003824//catalytic activity;GO:0004175//endopeptidase activity;GO:0070011//peptidase activity, acting on L-amino acid peptides;GO:0046872//metal ion binding;GO:0016787//hydrolase activity	GO:0043603//cellular amide metabolic process;GO:0044238//primary metabolic process;GO:0071704//organic substance metabolic process;GO:0044237//cellular metabolic process;GO:1901564//organonitrogen compound metabolic process;GO:0006807//nitrogen compound metabolic process;GO:0034641//cellular nitrogen compound metabolic process;GO:0043170//macromolecule metabolic process;GO:0008152//metabolic proc…
XM_005013876.4	272.59	248.41	128.82	360.52	60.72	9.86	104.42	96.53	19144.2	9482.43	8275.59	22575.1	2218.33	873.25	6378.2	7190.42	1.89566	0.000545118	0.0322988	Zdhhc22	PREDICTED: palmitoyltransferase ZDHHC22 [Anas platyrhynchos]	-	-	-	-	GO:0043227//membrane-bounded organelle;GO:0005623//cell;GO:0031224//intrinsic component of membrane;GO:0043231//intracellular membrane-bounded organelle;GO:0044464//cell part;GO:0005622//intracellular;GO:0044425//membrane part;GO:0043226//organelle;GO:0043229//intracellular organelle;GO:0016020//membrane;GO:0044424//intracellular part	GO:0016740//transferase activity;GO:0046914//transition metal ion binding;GO:0046872//metal ion binding;GO:0043167//ion binding;GO:0005488//binding;GO:0016746//transferase activity, transferring acyl groups;GO:0016747//transferase activity, transferring acyl groups other than amino-acyl groups;GO:0016409//palmitoyltransferase activity;GO:0003824//catalytic activity;GO:0043169//cation binding	GO:0009059//macromolecule biosynthetic process;GO:0044249//cellular biosynthetic process;GO:0043170//macromolecule metabolic process;GO:0009987//cellular process;GO:0036211//protein modification process;GO:0016043//cellular component organization;GO:0044802//single-organism membrane organization;GO:0044237//cellular metabolic process;GO:0034645//cellular macromolecule biosynthetic process;GO:0042…
XM_005014383.4	41.43	42.58	23.26	44.75	152.47	75.5	80.26	82.66	1484	829	762	1429	2841	3411	2500	3140	-1.3625	0.000391986	0.000520283	CA4	PREDICTED: carbonic anhydrase 4 [Anas platyrhynchos]	Organismal Systems;Metabolism	Excretory system;Energy metabolism	ko00910//Nitrogen metabolism;ko04964//Proximal tubule bicarbonate reclamation	K18246	GO:0031410//cytoplasmic vesicle;GO:0031090//organelle membrane;GO:0043231//intracellular membrane-bounded organelle;GO:0012505//endomembrane system;GO:0005886//plasma membrane;GO:0031982//vesicle;GO:0044464//cell part;GO:0031984//organelle subcompartment;GO:0012506//vesicle membrane;GO:0044446//intracellular organelle part;GO:0031226//intrinsic component of plasma membrane;GO:0005622//intracellul…	GO:0005488//binding;GO:0043169//cation binding;GO:0046914//transition metal ion binding;GO:0046872//metal ion binding;GO:0043167//ion binding	GO:0006820//anion transport;GO:0015711//organic anion transport;GO:0006811//ion transport;GO:0051234//establishment of localization;GO:0044765//single-organism transport;GO:0051179//localization;GO:0006810//transport;GO:1902578//single-organism localization;GO:0044699//single-organism process;GO:0071702//organic substance transport
XM_005015051.4	0	2.03	1.71	0	0	0	0	0	0	131.7	186.47	0	0	0	0	0	9.86882	0.00131734	0.143384	Smc6	PREDICTED: structural maintenance of chromosomes protein 6 [Anas platyrhynchos]	-	-	-	-	GO:0044424//intracellular part;GO:0043228//non-membrane-bounded organelle;GO:0016604//nuclear body;GO:0005654//nucleoplasm;GO:0043227//membrane-bounded organelle;GO:0098687//chromosomal region;GO:0044446//intracellular organelle part;GO:0031974//membrane-enclosed lumen;GO:0043233//organelle lumen;GO:0043232//intracellular non-membrane-bounded organelle;GO:0005634//nucleus;GO:0044464//cell part;GO…	GO:0001883//purine nucleoside binding;GO:0032550//purine ribonucleoside binding;GO:1901363//heterocyclic compound binding;GO:0097159//organic cyclic compound binding;GO:0032549//ribonucleoside binding;GO:0005488//binding;GO:0001882//nucleoside binding;GO:0036094//small molecule binding;GO:0097367//carbohydrate derivative binding	GO:0044710//single-organism metabolic process;GO:0044238//primary metabolic process;GO:0000725//recombinational repair;GO:0044260//cellular macromolecule metabolic process;GO:0007569//cell aging;GO:0009987//cellular process;GO:0050896//response to stimulus;GO:0034641//cellular nitrogen compound metabolic process;GO:0090304//nucleic acid metabolic process;GO:0051716//cellular response to stimulus;…
XM_005015294.4	0	0	0	0	1.8	1.08	0	0	0	0	0	0	125.44	181.69	0	0	-9.49185	0.00196091	0.144611	Eml4	PREDICTED: echinoderm microtubule-associated protein-like 4 isoform X2 [Anas platyrhynchos]	Human Diseases	Cancers	ko05200//Pathways in cancer;ko05223//Non-small cell lung cancer	K15420	GO:0044424//intracellular part;GO:0044464//cell part;GO:0043228//non-membrane-bounded organelle;GO:0043226//organelle;GO:0043232//intracellular non-membrane-bounded organelle;GO:0044446//intracellular organelle part;GO:0005819//spindle;GO:0044422//organelle part;GO:0015630//microtubule cytoskeleton;GO:0043229//intracellular organelle;GO:0044430//cytoskeletal part;GO:0005856//cytoskeleton;GO:00056…	-	-
XM_005016536.4	5.82	6.17	6.98	4.65	11.34	19.68	11.13	15.31	691.61	398.74	758.95	493	701.41	2952.09	1151.4	1931.28	-1.28255	0.00108217	0.0705093	CRISPLD2	PREDICTED: cysteine-rich secretory protein LCCL domain-containing 2 [Anas platyrhynchos]	-	-	-	-	GO:0044424//intracellular part;GO:0031410//cytoplasmic vesicle;GO:0016023//cytoplasmic, membrane-bounded vesicle;GO:0005623//cell;GO:0031982//vesicle;GO:0044444//cytoplasmic part;GO:0043231//intracellular membrane-bounded organelle;GO:0031988//membrane-bounded vesicle;GO:0044464//cell part;GO:0043229//intracellular organelle;GO:0005622//intracellular;GO:0043227//membrane-bounded organelle;GO:0043…	GO:0005488//binding;GO:0005539//glycosaminoglycan binding;GO:0097367//carbohydrate derivative binding	GO:0043062//extracellular structure organization;GO:0016043//cellular component organization;GO:0048856//anatomical structure development;GO:0032502//developmental process;GO:0009987//cellular process;GO:0044699//single-organism process;GO:0044763//single-organism cellular process;GO:0009653//anatomical structure morphogenesis;GO:0071840//cellular component organization or biogenesis
XM_005017543.4	0	5.26	5.04	0	0	0	0	0	0	187.34	302.09	0	0	0	0	0	11.3304	0.000411647	0.151273	ITGB5	PREDICTED: LOW QUALITY PROTEIN: integrin beta-5 [Anas platyrhynchos]	Human Diseases;Environmental Information Processing;Cellular Processes	Cellular community - eukaryotes;Cardiovascular diseases;Infectious diseases;Cell motility;Signaling molecules and interaction;Signal transduction;Cancers;Transport and catabolism	ko05165//Human papillomavirus infection;ko04151//PI3K-Akt signaling pathway;ko05205//Proteoglycans in cancer;ko04810//Regulation of actin cytoskeleton;ko04510//Focal adhesion;ko05412//Arrhythmogenic right ventricular cardiomyopathy (ARVC);ko05410//Hypertrophic cardiomyopathy (HCM);ko05414//Dilated cardiomyopathy (DCM);ko04512//ECM-receptor interaction;ko04145//Phagosome	K06588	GO:0005912//adherens junction;GO:0098636//protein complex involved in cell adhesion;GO:0044425//membrane part;GO:0044459//plasma membrane part;GO:0005924//cell-substrate adherens junction;GO:0070161//anchoring junction;GO:0031982//vesicle;GO:0031224//intrinsic component of membrane;GO:0030055//cell-substrate junction;GO:0016020//membrane;GO:0098797//plasma membrane protein complex;GO:0031226//int…	GO:0005102//receptor binding;GO:0005488//binding;GO:0005515//protein binding	GO:0051017//actin filament bundle assembly;GO:0044763//single-organism cellular process;GO:0022610//biological adhesion;GO:0007178//transmembrane receptor protein serine/threonine kinase signaling pathway;GO:0098609//cell-cell adhesion;GO:0032502//developmental process;GO:0044767//single-organism developmental process;GO:0023052//signaling;GO:0071840//cellular component organization or biogenesis…
XM_005017679.4	0	0	0	0	0	4.82	0	0	0	0	0	0	0	584.32	0	0	-10.2348	0.00533901	0.355918	NFKB1	PREDICTED: nuclear factor NF-kappa-B p105 subunit isoform X3 [Anas platyrhynchos]	Human Diseases;Organismal Systems;Cellular Processes;Environmental Information Processing	Cancers;Endocrine system;Development;Nervous system;Signal transduction;Cardiovascular diseases;Substance dependence;Endocrine and metabolic diseases;Infectious diseases;Drug resistance;Aging;Immune diseases;Cell growth and death;Immune system	ko05200//Pathways in cancer;ko05165//Human papillomavirus infection;ko04010//MAPK signaling pathway;ko04151//PI3K-Akt signaling pathway;ko04024//cAMP signaling pathway;ko04014//Ras signaling pathway;ko05166//HTLV-I infection;ko05202//Transcriptional misregulation in cancers;ko05163//Human cytomegalovirus infection;ko05206//MicroRNAs in cancer;ko05169//Epstein-Barr virus infection;ko05203//Viral c…	K02580	GO:0005622//intracellular;GO:0005623//cell;GO:0044424//intracellular part;GO:0043226//organelle;GO:0044464//cell part;GO:0043227//membrane-bounded organelle;GO:0044444//cytoplasmic part;GO:0043231//intracellular membrane-bounded organelle;GO:0043229//intracellular organelle;GO:0005737//cytoplasm	GO:0000975//regulatory region DNA binding;GO:0046983//protein dimerization activity;GO:0001067//regulatory region nucleic acid binding;GO:0097159//organic cyclic compound binding;GO:1901363//heterocyclic compound binding;GO:0005488//binding;GO:0001071//nucleic acid binding transcription factor activity;GO:0044212//transcription regulatory region DNA binding;GO:0003677//DNA binding;GO:0003676//nuc…	GO:0019219//regulation of nucleobase-containing compound metabolic process;GO:0043207//response to external biotic stimulus;GO:0070887//cellular response to chemical stimulus;GO:0009719//response to endogenous stimulus;GO:2001141//regulation of RNA biosynthetic process;GO:0051055//negative regulation of lipid biosynthetic process;GO:0009893//positive regulation of metabolic process;GO:0031327//ne…
XM_005018168.4	3.55	5.71	4.21	3.9	11.08	18.31	10.66	16.03	294.63	257.75	319.57	289.09	478.75	1918.16	770.23	1412.56	-1.69089	9.9e-05	0.038431	PELI1	E3 ubiquitin-protein ligase pellino-like 1, partial [Ophiophagus hannah]	-	-	-	-	GO:0005623//cell;GO:0043231//intracellular membrane-bounded organelle;GO:0043226//organelle;GO:0005622//intracellular;GO:0043227//membrane-bounded organelle;GO:0043229//intracellular organelle;GO:0044424//intracellular part;GO:0044464//cell part	GO:0003824//catalytic activity;GO:0016740//transferase activity;GO:0019787//ubiquitin-like protein transferase activity	GO:0019219//regulation of nucleobase-containing compound metabolic process;GO:0048518//positive regulation of biological process;GO:0032501//multicellular organismal process;GO:0044699//single-organism process;GO:0043433//negative regulation of sequence-specific DNA binding transcription factor activity;GO:0051171//regulation of nitrogen compound metabolic process;GO:0007162//negative regulation …
XM_005018269.3	0	0	0	0	0	0	0	6.42	0	0	0	0	0	0	0	680.99	-10.6484	0.00291414	0.355918	CMIP	PREDICTED: C-Maf-inducing protein isoform X1 [Anas platyrhynchos]	-	-	-	-	-	-	-
XM_005019284.4	5.71	3.64	2.3	2.68	12.05	6.64	9.1	9.51	529.38	183.25	195.05	221.53	581.44	776.74	733.93	935.32	-1.38014	0.00539894	0.00505596	SOAT1	PREDICTED: sterol O-acyltransferase 1 [Anas platyrhynchos]	Organismal Systems;Metabolism	Digestive system;Lipid metabolism	ko04979//Cholesterol metabolism;ko00100//Steroid biosynthesis	K00637	GO:0016020//membrane;GO:0043229//intracellular organelle;GO:0043227//membrane-bounded organelle;GO:0031090//organelle membrane;GO:0044422//organelle part;GO:0044464//cell part;GO:0043226//organelle;GO:0043231//intracellular membrane-bounded organelle;GO:0031224//intrinsic component of membrane;GO:0005622//intracellular;GO:0005623//cell;GO:0044425//membrane part;GO:0044424//intracellular part	GO:0005496//steroid binding;GO:0008289//lipid binding;GO:0003824//catalytic activity;GO:0016740//transferase activity;GO:0005488//binding;GO:0004772//sterol O-acyltransferase activity;GO:0043178//alcohol binding;GO:0097159//organic cyclic compound binding;GO:0008374//O-acyltransferase activity;GO:0032934//sterol binding;GO:0036094//small molecule binding;GO:0016746//transferase activity, transfer…	GO:0006066//alcohol metabolic process;GO:0010559//regulation of glycoprotein biosynthetic process;GO:0048522//positive regulation of cellular process;GO:0044710//single-organism metabolic process;GO:0009891//positive regulation of biosynthetic process;GO:0044237//cellular metabolic process;GO:0019222//regulation of metabolic process;GO:0006869//lipid transport;GO:0071704//organic substance metabo…
XM_005019678.4	0.2	0.46	0.18	0.05	0	0	0	0	19.25	23.74	15.99	3.95	0	0	0	0	7.79766	0.00368881	0.00992882	St14	PREDICTED: suppressor of tumorigenicity 14 protein isoform X1 [Anas platyrhynchos]	Human Diseases	Cancers	ko05206//MicroRNAs in cancer	K08670	GO:0031982//vesicle;GO:0019898//extrinsic component of membrane;GO:0031988//membrane-bounded vesicle;GO:0043227//membrane-bounded organelle;GO:0043226//organelle;GO:0016020//membrane;GO:0044425//membrane part	GO:0016787//hydrolase activity;GO:0004175//endopeptidase activity;GO:0003824//catalytic activity;GO:0008233//peptidase activity;GO:0070011//peptidase activity, acting on L-amino acid peptides	GO:0030154//cell differentiation;GO:0019538//protein metabolic process;GO:0043170//macromolecule metabolic process;GO:0030855//epithelial cell differentiation;GO:0044763//single-organism cellular process;GO:0009987//cellular process;GO:0009913//epidermal cell differentiation;GO:0009888//tissue development;GO:0071704//organic substance metabolic process;GO:0048869//cellular developmental process;G…
XM_005019679.4	0.2	0.46	0.18	0.05	0	0	0	0	19.25	23.74	15.99	3.95	0	0	0	0	7.79766	0.00368939	0.00992882	St14	PREDICTED: suppressor of tumorigenicity 14 protein isoform X1 [Anas platyrhynchos]	Human Diseases	Cancers	ko05206//MicroRNAs in cancer	K08670	GO:0016020//membrane;GO:0031988//membrane-bounded vesicle;GO:0031982//vesicle;GO:0043226//organelle;GO:0044425//membrane part;GO:0019898//extrinsic component of membrane;GO:0043227//membrane-bounded organelle	GO:0004175//endopeptidase activity;GO:0016787//hydrolase activity;GO:0070011//peptidase activity, acting on L-amino acid peptides;GO:0003824//catalytic activity;GO:0008233//peptidase activity	GO:0060429//epithelium development;GO:0009913//epidermal cell differentiation;GO:0044238//primary metabolic process;GO:0030855//epithelial cell differentiation;GO:0043170//macromolecule metabolic process;GO:0071704//organic substance metabolic process;GO:0009987//cellular process;GO:0032502//developmental process;GO:0048869//cellular developmental process;GO:0019538//protein metabolic process;GO:…
XM_005019969.4	0	0	0	0	0	3.41	0	0	0	0.01	0	0.01	0.05	643.37	0.01	0	-9.73556	0.00386628	0.355876	LRP3	PREDICTED: low-density lipoprotein receptor-related protein 3 isoform X3 [Anas platyrhynchos]	-	-	-	-	-	-	-
XM_005020205.4	0.91	1.73	0.24	0.5	0	0	0	0	92.39	95.45	22.3	45.37	0	0	0	0	9.72281	1.53e-05	0.0120437	FAM120B	PREDICTED: constitutive coactivator of peroxisome proliferator-activated receptor gamma isoform X1 [Anas platyrhynchos]	-	-	-	-	-	-	-
XM_005020961.4	20.03	14.18	24.12	23.51	1.33	9.51	6.22	4.52	1162	447	1280	1216	40	696	314	278	1.92311	0.000497737	0.0264087	SFRP2	secreted frizzled-related protein 2 [Anas platyrhynchos]	Environmental Information Processing	Signal transduction	ko04310//Wnt signaling pathway	K02176	GO:0005576//extracellular region;GO:0044421//extracellular region part	GO:0061134//peptidase regulator activity;GO:0005102//receptor binding;GO:0005515//protein binding;GO:0030234//enzyme regulator activity;GO:0098772//molecular function regulator;GO:0008047//enzyme activator activity;GO:0005488//binding;GO:0061135//endopeptidase regulator activity	GO:0009893//positive regulation of metabolic process;GO:0003208//cardiac ventricle morphogenesis;GO:0044700//single organism signaling;GO:0008285//negative regulation of cell proliferation;GO:0042221//response to chemical;GO:0044093//positive regulation of molecular function;GO:0001558//regulation of cell growth;GO:0010769//regulation of cell morphogenesis involved in differentiation;GO:0032268//…
XM_005022359.4	0	0	8.75	0	0	0	0	0	0	0	1370.32	0	0	0	0	0	11.0951	0.000631765	0.355918	TNC	PREDICTED: tenascin isoform X4 [Anas platyrhynchos]	Human Diseases;Environmental Information Processing;Cellular Processes	Signaling molecules and interaction;Signal transduction;Cellular community - eukaryotes;Infectious diseases;Cancers	ko05165//Human papillomavirus infection;ko04151//PI3K-Akt signaling pathway;ko04510//Focal adhesion;ko05206//MicroRNAs in cancer;ko04512//ECM-receptor interaction	K06252	GO:0030055//cell-substrate junction;GO:0005576//extracellular region;GO:0005924//cell-substrate adherens junction;GO:0031012//extracellular matrix;GO:0030054//cell junction;GO:0005912//adherens junction;GO:0070161//anchoring junction;GO:0005578//proteinaceous extracellular matrix;GO:0044420//extracellular matrix component;GO:0044421//extracellular region part	GO:0005488//binding;GO:0005515//protein binding	GO:0061564//axon development;GO:0022008//neurogenesis;GO:0071840//cellular component organization or biogenesis;GO:0050794//regulation of cellular process;GO:0003006//developmental process involved in reproduction;GO:0022414//reproductive process;GO:0048468//cell development;GO:0048856//anatomical structure development;GO:0044707//single-multicellular organism process;GO:0001655//urogenital syste…
XM_005023567.4	0	0	0	0	0.7	0.27	0.39	0	0	0	0	0	71.25	66.58	66.4	0	-8.40939	0.000693866	0.0242106	ADORA2A	PREDICTED: adenosine receptor A2a [Anas platyrhynchos]	Environmental Information Processing;Organismal Systems;Human Diseases	Signal transduction;Signaling molecules and interaction;Neurodegenerative diseases;Circulatory system;Substance dependence	ko04080//Neuroactive ligand-receptor interaction;ko04024//cAMP signaling pathway;ko04020//Calcium signaling pathway;ko04015//Rap1 signaling pathway;ko04270//Vascular smooth muscle contraction;ko05034//Alcoholism;ko05012//Parkinson disease	K04266	GO:0031224//intrinsic component of membrane;GO:0016020//membrane;GO:0044425//membrane part	GO:0004888//transmembrane signaling receptor activity;GO:0004872//receptor activity;GO:0038023//signaling receptor activity;GO:0004871//signal transducer activity;GO:0060089//molecular transducer activity;GO:0099600//transmembrane receptor activity	GO:0009719//response to endogenous stimulus;GO:0050804//modulation of synaptic transmission;GO:0050863//regulation of T cell activation;GO:0044700//single organism signaling;GO:0030804//positive regulation of cyclic nucleotide biosynthetic process;GO:0007166//cell surface receptor signaling pathway;GO:0050794//regulation of cellular process;GO:0046634//regulation of alpha-beta T cell activation;G…
XM_005023622.4	12.94	17.01	19.17	23.57	54.63	22.27	55.93	41.99	1382.95	988	1873.63	2245.92	3036.94	3002	5198.42	4758.47	-1.26604	0.000819795	0.00963179	CP	PREDICTED: ceruloplasmin isoform X1 [Anas platyrhynchos]	Cellular Processes;Metabolism	Metabolism of cofactors and vitamins;Cell growth and death	ko04216//Ferroptosis;ko00860//Porphyrin and chlorophyll metabolism	K13624	GO:0044422//organelle part;GO:0098805//whole membrane;GO:0016020//membrane;GO:0043226//organelle;GO:0031982//vesicle;GO:0043227//membrane-bounded organelle;GO:0044424//intracellular part;GO:0043229//intracellular organelle;GO:0043231//intracellular membrane-bounded organelle;GO:0044464//cell part;GO:0031090//organelle membrane;GO:0005623//cell;GO:0044444//cytoplasmic part;GO:0005773//vacuole;GO:0…	GO:0046914//transition metal ion binding;GO:0005515//protein binding;GO:0043169//cation binding;GO:0043167//ion binding;GO:0003824//catalytic activity;GO:0046872//metal ion binding;GO:0005488//binding	GO:0006873//cellular ion homeostasis;GO:1902578//single-organism localization;GO:0055082//cellular chemical homeostasis;GO:0006810//transport;GO:0044765//single-organism transport;GO:0019725//cellular homeostasis;GO:0046916//cellular transition metal ion homeostasis;GO:0065007//biological regulation;GO:0000041//transition metal ion transport;GO:0044763//single-organism cellular process;GO:0008152…
XM_005024797.3	1.76	2.36	9.01	4.25	0.58	0.78	0.48	0.23	227.16	165.74	1064.62	489.14	38.87	126.85	53.73	32.19	3.06973	5.36e-05	0.0856025	PRSS35	PREDICTED: inactive serine protease 35 [Anas platyrhynchos]	-	-	-	-	GO:0044464//cell part;GO:0043227//membrane-bounded organelle;GO:0005623//cell;GO:0043231//intracellular membrane-bounded organelle;GO:0005622//intracellular;GO:0043226//organelle;GO:0044424//intracellular part;GO:0043229//intracellular organelle	GO:0004175//endopeptidase activity;GO:0008233//peptidase activity;GO:0003824//catalytic activity;GO:0070011//peptidase activity, acting on L-amino acid peptides;GO:0016787//hydrolase activity	GO:0044238//primary metabolic process;GO:0043170//macromolecule metabolic process;GO:0071704//organic substance metabolic process;GO:0019538//protein metabolic process;GO:0008152//metabolic process
XM_005025093.4	0	0	0	0	0	0.45	1.49	0.83	0	0	0	0	0	33.01	75.27	50.88	-9.43567	0.00232527	0.0457838	Slc41a1	PREDICTED: solute carrier family 41 member 3 isoform X1 [Anas platyrhynchos]	-	-	-	-	-	GO:0022857//transmembrane transporter activity;GO:0022891//substrate-specific transmembrane transporter activity;GO:0022892//substrate-specific transporter activity;GO:0005215//transporter activity;GO:0015075//ion transmembrane transporter activity	GO:0006810//transport;GO:0006811//ion transport;GO:0051234//establishment of localization;GO:0044765//single-organism transport;GO:0006812//cation transport;GO:0044699//single-organism process;GO:0051179//localization;GO:1902578//single-organism localization
XM_005025118.4	11.38	5.31	11.15	11.23	2.56	4.96	3.65	1.93	1030.58	261.36	923.95	906.56	120.5	567.1	287.43	185.27	1.57649	0.00216191	0.0504717	SLC20A2	PREDICTED: sodium-dependent phosphate transporter 2 isoform X2 [Anas platyrhynchos]	-	-	-	-	GO:0043226//organelle;GO:0031982//vesicle;GO:0043227//membrane-bounded organelle;GO:0031988//membrane-bounded vesicle	-	GO:0006810//transport;GO:0044763//single-organism cellular process;GO:0051179//localization;GO:0006811//ion transport;GO:0015698//inorganic anion transport;GO:1902578//single-organism localization;GO:0006820//anion transport;GO:0044699//single-organism process;GO:0051234//establishment of localization;GO:0044765//single-organism transport;GO:0009987//cellular process
XM_005025181.3	0	0	0	0	0.33	0	2.33	0.4	0	0	0	0	12.6	0	150.27	31.56	-9.57932	0.00159847	0.208548	PIK3AP1	PREDICTED: phosphoinositide 3-kinase adapter protein 1 isoform X1 [Anas platyrhynchos]	-	-	-	-	GO:0016020//membrane;GO:0044464//cell part;GO:0044444//cytoplasmic part;GO:0044424//intracellular part;GO:0005623//cell;GO:0005622//intracellular;GO:0005737//cytoplasm	GO:0005488//binding;GO:0005515//protein binding;GO:0043548//phosphatidylinositol 3-kinase binding	GO:0050896//response to stimulus;GO:0009719//response to endogenous stimulus;GO:0009987//cellular process;GO:0014066//regulation of phosphatidylinositol 3-kinase signaling;GO:0002682//regulation of immune system process;GO:0002684//positive regulation of immune system process;GO:0048583//regulation of response to stimulus;GO:0044763//single-organism cellular process;GO:0050794//regulation of cell…
XM_005025328.4	0	0	0	0	0	0	3.23	0	0	0	0	0	0	0	287.55	0	-9.65732	0.00976323	0.355918	THRAP3	PREDICTED: thyroid hormone receptor-associated protein 3 isoform X1 [Anas platyrhynchos]	-	-	-	-	GO:0043234//protein complex;GO:0043231//intracellular membrane-bounded organelle;GO:0043226//organelle;GO:0043227//membrane-bounded organelle;GO:0044424//intracellular part;GO:0005622//intracellular;GO:0005623//cell;GO:0044464//cell part;GO:0043229//intracellular organelle;GO:0032991//macromolecular complex	GO:0003676//nucleic acid binding;GO:0097159//organic cyclic compound binding;GO:0003712//transcription cofactor activity;GO:0005515//protein binding;GO:1901363//heterocyclic compound binding;GO:0060089//molecular transducer activity;GO:0001076//transcription factor activity, RNA polymerase II transcription factor binding;GO:0000988//transcription factor activity, protein binding;GO:0005488//bindi…	GO:0071396//cellular response to lipid;GO:0050794//regulation of cellular process;GO:0006357//regulation of transcription from RNA polymerase II promoter;GO:0010604//positive regulation of macromolecule metabolic process;GO:0030522//intracellular receptor signaling pathway;GO:0006401//RNA catabolic process;GO:0071383//cellular response to steroid hormone stimulus;GO:0018130//heterocycle biosynthe…
XM_005025990.4	0	0	0	0	0	0.37	0.82	0	0	0	0	0	0	99.98	150.63	0	-8.21675	0.00398511	0.146894	SLC6A6	PREDICTED: sodium- and chloride-dependent taurine transporter isoform X2 [Anas platyrhynchos]	Organismal Systems	Nervous system	ko04727//GABAergic synapse	K05039	GO:0031224//intrinsic component of membrane;GO:0044425//membrane part;GO:0016020//membrane;GO:0016021//integral component of membrane	GO:0022891//substrate-specific transmembrane transporter activity;GO:0022804//active transmembrane transporter activity;GO:0022890//inorganic cation transmembrane transporter activity;GO:1901682//sulfur compound transmembrane transporter activity;GO:0015294//solute:cation symporter activity;GO:0005343//organic acid:sodium symporter activity;GO:0015370//solute:sodium symporter activity;GO:0005215/…	GO:1902578//single-organism localization;GO:0044699//single-organism process;GO:0051234//establishment of localization;GO:0071702//organic substance transport;GO:0044763//single-organism cellular process;GO:0006810//transport;GO:0044765//single-organism transport;GO:0051179//localization;GO:0009987//cellular process;GO:0015849//organic acid transport
XM_005026017.4	208.88	120.44	249.11	222.67	80.74	64.01	43.86	67.37	15681	4914.73	17107.4	14904.1	3153.47	6061.38	2864.13	5364.05	1.64595	1.85e-06	0.0228961	INSIG1	PREDICTED: insulin-induced gene 1 protein [Anas platyrhynchos]	-	-	-	-	GO:0043234//protein complex;GO:0044425//membrane part;GO:0043227//membrane-bounded organelle;GO:0031224//intrinsic component of membrane;GO:0032991//macromolecular complex;GO:0044422//organelle part;GO:0043226//organelle;GO:0031090//organelle membrane;GO:0016020//membrane	-	GO:0032502//developmental process;GO:0019216//regulation of lipid metabolic process;GO:0009889//regulation of biosynthetic process;GO:0019222//regulation of metabolic process;GO:0044699//single-organism process;GO:0045596//negative regulation of cell differentiation;GO:0048513//animal organ development;GO:0080090//regulation of primary metabolic process;GO:0051093//negative regulation of developm…
XM_005027506.4	0	2.17	0	1.24	0	0	0	0	0	116.86	0	109.62	0	0	0	0	9.73556	0.00274093	0.134302	EHMT1	PREDICTED: histone-lysine N-methyltransferase EHMT1 isoform X7 [Anas platyrhynchos]	Metabolism;Organismal Systems	Amino acid metabolism;Aging	ko04211//Longevity regulating pathway - mammal;ko00310//Lysine degradation	K11420	GO:0016020//membrane;GO:0005623//cell;GO:0043231//intracellular membrane-bounded organelle;GO:0044464//cell part;GO:0043232//intracellular non-membrane-bounded organelle;GO:0005622//intracellular;GO:0044424//intracellular part;GO:0043228//non-membrane-bounded organelle;GO:0043226//organelle;GO:0043227//membrane-bounded organelle;GO:0043229//intracellular organelle	GO:0043169//cation binding;GO:0016740//transferase activity;GO:0016278//lysine N-methyltransferase activity;GO:0005488//binding;GO:0016279//protein-lysine N-methyltransferase activity;GO:0008757//S-adenosylmethionine-dependent methyltransferase activity;GO:0046914//transition metal ion binding;GO:0008276//protein methyltransferase activity;GO:0016741//transferase activity, transferring one-carbon…	GO:0006725//cellular aromatic compound metabolic process;GO:0051171//regulation of nitrogen compound metabolic process;GO:0009987//cellular process;GO:0016569//covalent chromatin modification;GO:0031326//regulation of cellular biosynthetic process;GO:0071704//organic substance metabolic process;GO:0006464//cellular protein modification process;GO:0036211//protein modification process;GO:0050789//…
XM_005027512.4	0.95	0.68	0	0.92	0	0	0	0	141.76	55.54	0	122.37	0	0	0	0	9.31628	0.000173752	0.0487513	EHMT1	PREDICTED: histone-lysine N-methyltransferase EHMT1 isoform X1 [Anas platyrhynchos]	Organismal Systems;Metabolism	Aging;Amino acid metabolism	ko04211//Longevity regulating pathway - mammal;ko00310//Lysine degradation	K11420	GO:0043232//intracellular non-membrane-bounded organelle;GO:0005622//intracellular;GO:0044464//cell part;GO:0043226//organelle;GO:0044424//intracellular part;GO:0043231//intracellular membrane-bounded organelle;GO:0043227//membrane-bounded organelle;GO:0043229//intracellular organelle;GO:0016020//membrane;GO:0005623//cell;GO:0043228//non-membrane-bounded organelle	GO:0016740//transferase activity;GO:0018024//histone-lysine N-methyltransferase activity;GO:0008170//N-methyltransferase activity;GO:0005515//protein binding;GO:0043167//ion binding;GO:0019904//protein domain specific binding;GO:0042054//histone methyltransferase activity;GO:0003824//catalytic activity;GO:0008168//methyltransferase activity;GO:0016279//protein-lysine N-methyltransferase activity;…	GO:0044260//cellular macromolecule metabolic process;GO:0006259//DNA metabolic process;GO:0080090//regulation of primary metabolic process;GO:0009889//regulation of biosynthetic process;GO:0018205//peptidyl-lysine modification;GO:0060255//regulation of macromolecule metabolic process;GO:0009987//cellular process;GO:0034641//cellular nitrogen compound metabolic process;GO:0044710//single-organism …
XM_005027768.3	5.9	1.09	3.17	0.64	0	0	0	0	476.22	47.98	233.83	46.14	0	0	0	0	11.3987	8.86e-09	0.0955554	PRSS23	PREDICTED: serine protease 23 isoform X1 [Anas platyrhynchos]	-	-	-	-	GO:0043227//membrane-bounded organelle;GO:0044464//cell part;GO:0043226//organelle;GO:0005622//intracellular;GO:0043231//intracellular membrane-bounded organelle;GO:0044424//intracellular part;GO:0031982//vesicle;GO:0031988//membrane-bounded vesicle;GO:0043229//intracellular organelle;GO:0005623//cell	GO:0016787//hydrolase activity;GO:0070011//peptidase activity, acting on L-amino acid peptides;GO:0003824//catalytic activity;GO:0004175//endopeptidase activity;GO:0008233//peptidase activity	GO:0019538//protein metabolic process;GO:0008152//metabolic process;GO:0044238//primary metabolic process;GO:0071704//organic substance metabolic process;GO:0043170//macromolecule metabolic process
XM_005027771.4	20.2	17.68	40.14	17.25	10.26	13.65	13.35	7.5	1652.57	786.13	3003.83	1258.22	436.65	1408.98	950.03	650.46	1.08981	0.00919942	0.169678	PRSS23	PREDICTED: serine protease 23 isoform X2 [Anas platyrhynchos]	-	-	-	-	GO:0044464//cell part;GO:0043231//intracellular membrane-bounded organelle;GO:0031982//vesicle;GO:0031988//membrane-bounded vesicle;GO:0043227//membrane-bounded organelle;GO:0044424//intracellular part;GO:0005623//cell;GO:0043226//organelle;GO:0043229//intracellular organelle;GO:0005622//intracellular	GO:0008233//peptidase activity;GO:0070011//peptidase activity, acting on L-amino acid peptides;GO:0003824//catalytic activity;GO:0016787//hydrolase activity;GO:0004175//endopeptidase activity	GO:0019538//protein metabolic process;GO:0043170//macromolecule metabolic process;GO:0071704//organic substance metabolic process;GO:0008152//metabolic process;GO:0044238//primary metabolic process
XM_005027954.3	0	0	0	0	0	4.3	13.85	0	0	0	0	0	0	319.62	709.44	0	-12.1477	8.57e-05	0.177673	--	PREDICTED: tropomyosin alpha-1 chain isoform X4 [Anas platyrhynchos]	-	-	-	-	GO:0044464//cell part;GO:0005623//cell;GO:0032991//macromolecular complex;GO:0044463//cell projection part;GO:0044424//intracellular part;GO:0043226//organelle;GO:0043232//intracellular non-membrane-bounded organelle;GO:0043234//protein complex;GO:0098589//membrane region;GO:0098590//plasma membrane region;GO:0043292//contractile fiber;GO:0016020//membrane;GO:0044459//plasma membrane part;GO:0031…	GO:0005488//binding;GO:0005515//protein binding;GO:0008092//cytoskeletal protein binding	GO:0009887//organ morphogenesis;GO:0006941//striated muscle contraction;GO:0055008//cardiac muscle tissue morphogenesis;GO:0072359//circulatory system development;GO:0044767//single-organism developmental process;GO:1903522//regulation of blood circulation;GO:0001996//positive regulation of heart rate by epinephrine-norepinephrine;GO:0032501//multicellular organismal process;GO:0071840//cellular …
XM_005029135.4	0	0	0.9	0.29	0	0	0	0	0	0	128.19	39.76	0	0	0	0	8.21675	0.00796927	0.21413	RPAP1	PREDICTED: RNA polymerase II-associated protein 1 [Anas platyrhynchos]	-	-	-	-	-	-	-
XM_005029193.3	0.2	0.75	0.37	0.18	0	0	0	0	18.9	37.48	31.56	14.49	0	0	0	0	8.55075	0.000731703	0.0030755	ACSBG2	PREDICTED: long-chain-fatty-acid--CoA ligase ACSBG2 isoform X1 [Anas platyrhynchos]	Metabolism;Organismal Systems	Global and overview maps;Endocrine system;Lipid metabolism	ko01100//Metabolic pathways;ko03320//PPAR signaling pathway;ko04920//Adipocytokine signaling pathway;ko01212//Fatty acid metabolism;ko00071//Fatty acid degradation;ko00061//Fatty acid biosynthesis	K15013	GO:0043227//membrane-bounded organelle;GO:0044464//cell part;GO:0044424//intracellular part;GO:0043229//intracellular organelle;GO:0005622//intracellular;GO:0005623//cell;GO:0043226//organelle;GO:0043231//intracellular membrane-bounded organelle	GO:0016790//thiolester hydrolase activity;GO:0003824//catalytic activity;GO:0016874//ligase activity;GO:0015645//fatty acid ligase activity;GO:0016788//hydrolase activity, acting on ester bonds;GO:0016289//CoA hydrolase activity;GO:0016877//ligase activity, forming carbon-sulfur bonds;GO:0016787//hydrolase activity	GO:0044281//small molecule metabolic process;GO:0044710//single-organism metabolic process;GO:0008152//metabolic process;GO:0009987//cellular process;GO:0006082//organic acid metabolic process;GO:0044237//cellular metabolic process;GO:0032787//monocarboxylic acid metabolic process;GO:0044699//single-organism process;GO:0043436//oxoacid metabolic process;GO:0019752//carboxylic acid metabolic proce…
XM_005029194.4	0.63	2.31	6.16	2.36	0.73	0.22	0.65	0.18	60.22	119.88	537.05	200.71	36.1	26.45	54.03	18.46	2.68666	0.00546181	0.116503	ACSBG2	PREDICTED: long-chain-fatty-acid--CoA ligase ACSBG2 isoform X2 [Anas platyrhynchos]	Metabolism;Organismal Systems	Global and overview maps;Lipid metabolism;Endocrine system	ko01100//Metabolic pathways;ko03320//PPAR signaling pathway;ko04920//Adipocytokine signaling pathway;ko01212//Fatty acid metabolism;ko00071//Fatty acid degradation;ko00061//Fatty acid biosynthesis	K15013	GO:0044464//cell part;GO:0044424//intracellular part;GO:0043231//intracellular membrane-bounded organelle;GO:0005623//cell;GO:0043226//organelle;GO:0043227//membrane-bounded organelle;GO:0043229//intracellular organelle;GO:0005622//intracellular	GO:0016289//CoA hydrolase activity;GO:0016788//hydrolase activity, acting on ester bonds;GO:0016787//hydrolase activity;GO:0016874//ligase activity;GO:0016790//thiolester hydrolase activity;GO:0003824//catalytic activity;GO:0016877//ligase activity, forming carbon-sulfur bonds;GO:0015645//fatty acid ligase activity	GO:0009987//cellular process;GO:0044281//small molecule metabolic process;GO:0043436//oxoacid metabolic process;GO:0044699//single-organism process;GO:0006082//organic acid metabolic process;GO:0044763//single-organism cellular process;GO:0019752//carboxylic acid metabolic process;GO:0008152//metabolic process;GO:0044237//cellular metabolic process;GO:0071704//organic substance metabolic process;…
XM_005029426.2	160.27	136.81	309.23	229.57	102.34	85.16	94.65	61.3	12363	5736.1	21819.7	15789.2	4107	8286.35	6350	5015.07	1.2832	0.000246132	0.0614106	LIPA	PREDICTED: lysosomal acid lipase/cholesteryl ester hydrolase [Anas platyrhynchos]	Organismal Systems;Metabolism;Cellular Processes	Transport and catabolism;Lipid metabolism;Digestive system	ko04142//Lysosome;ko04979//Cholesterol metabolism;ko00100//Steroid biosynthesis	K01052	GO:0031988//membrane-bounded vesicle;GO:0043227//membrane-bounded organelle;GO:0043226//organelle;GO:0031982//vesicle	GO:0016788//hydrolase activity, acting on ester bonds;GO:0016787//hydrolase activity;GO:0016298//lipase activity;GO:0003824//catalytic activity	GO:0044707//single-multicellular organism process;GO:0050896//response to stimulus;GO:0006950//response to stress;GO:0044767//single-organism developmental process;GO:0030323//respiratory tube development;GO:0001894//tissue homeostasis;GO:0048513//animal organ development;GO:0032501//multicellular organismal process;GO:0048871//multicellular organismal homeostasis;GO:0044238//primary metabolic pr…
XM_005029782.4	1.44	1.51	0.26	0.63	2.52	4.95	2.36	5.28	273.04	155.89	45.41	106.86	249.62	1187.67	390.36	1064.98	-1.97633	0.00242742	0.0532731	DGKD	PREDICTED: diacylglycerol kinase delta isoform X1 [Anas platyrhynchos]	Human Diseases;Metabolism;Environmental Information Processing	Signal transduction;Lipid metabolism;Cancers;Global and overview maps	ko01100//Metabolic pathways;ko04072//Phospholipase D signaling pathway;ko04070//Phosphatidylinositol signaling system;ko00564//Glycerophospholipid metabolism;ko05231//Choline metabolism in cancer;ko00561//Glycerolipid metabolism	K00901	GO:0044464//cell part;GO:0005623//cell;GO:0044424//intracellular part;GO:0043226//organelle;GO:0016020//membrane;GO:0005622//intracellular;GO:0043231//intracellular membrane-bounded organelle;GO:0043229//intracellular organelle;GO:0043227//membrane-bounded organelle	GO:0003824//catalytic activity;GO:0097367//carbohydrate derivative binding;GO:0016301//kinase activity;GO:0036094//small molecule binding;GO:1901363//heterocyclic compound binding;GO:0032549//ribonucleoside binding;GO:0016740//transferase activity;GO:0001882//nucleoside binding;GO:0097159//organic cyclic compound binding;GO:0001883//purine nucleoside binding;GO:0005488//binding;GO:0032550//purine…	GO:0007186//G-protein coupled receptor signaling pathway;GO:0070271//protein complex biogenesis;GO:0006461//protein complex assembly;GO:0007165//signal transduction;GO:0051716//cellular response to stimulus;GO:0022607//cellular component assembly;GO:0043933//macromolecular complex subunit organization;GO:0023052//signaling;GO:0050794//regulation of cellular process;GO:0051259//protein oligomeriza…
XM_005031177.4	2.22	5.02	3.08	2.8	6.54	13.64	10.19	10.68	449.17	552.34	571.36	505.67	688.75	3485.22	1794.93	2295.22	-1.64561	7.76e-05	0.0373646	AGTR2	PREDICTED: type-2 angiotensin II receptor [Anas platyrhynchos]	Organismal Systems;Environmental Information Processing	Signaling molecules and interaction;Circulatory system;Endocrine system	ko04080//Neuroactive ligand-receptor interaction;ko04261//Adrenergic signaling in cardiomyocytes;ko04614//Renin-angiotensin system	K04167	GO:0031224//intrinsic component of membrane;GO:0016020//membrane;GO:0044425//membrane part	GO:0001595//angiotensin receptor activity;GO:0099600//transmembrane receptor activity;GO:0008528//G-protein coupled peptide receptor activity;GO:0038023//signaling receptor activity;GO:0004888//transmembrane signaling receptor activity;GO:0004871//signal transducer activity;GO:0004930//G-protein coupled receptor activity;GO:0001653//peptide receptor activity;GO:0060089//molecular transducer activ…	GO:0010648//negative regulation of cell communication;GO:0050880//regulation of blood vessel size;GO:0035307//positive regulation of protein dephosphorylation;GO:0051353//positive regulation of oxidoreductase activity;GO:0080090//regulation of primary metabolic process;GO:0060993//kidney morphogenesis;GO:0044700//single organism signaling;GO:0050896//response to stimulus;GO:0009968//negative regu…
XM_013092422.3	0	0	0	0	0	1.9	0.17	0	0	0	0	0	0	364.4	22.99	0	-9.01542	0.00307247	0.320019	CGNL1	PREDICTED: cingulin-like protein 1 isoform X1 [Anas platyrhynchos]	Cellular Processes	Cellular community - eukaryotes	ko04530//Tight junction	K21110	GO:0005623//cell;GO:0043226//organelle;GO:0005622//intracellular;GO:0043232//intracellular non-membrane-bounded organelle;GO:0043229//intracellular organelle;GO:0030054//cell junction;GO:0043228//non-membrane-bounded organelle;GO:0005911//cell-cell junction;GO:0043296//apical junction complex;GO:0044464//cell part;GO:0044424//intracellular part;GO:0015629//actin cytoskeleton;GO:0005856//cytoskele…	-	-
XM_013092557.3	1.86	3.92	1.26	1.9	23.3	1.31	31.47	2.29	425.87	487.27	264.23	387.48	2771.26	378.31	6258.89	554.37	-2.70688	0.000471604	0.176237	TMCC1	PREDICTED: transmembrane and coiled-coil domains protein 1 isoform X2 [Anas platyrhynchos]	-	-	-	-	-	-	-
XM_013093534.3	2.64	0	0.41	3.82	7.69	52.52	5.27	2.65	297.14	0	42.14	383.69	451.12	7470.81	516.49	317.22	-3.30991	0.00444395	0.298262	Cidea	PREDICTED: cell death activator CIDE-A isoform X2 [Anas platyrhynchos]	-	-	-	-	-	-	GO:0016265//death;GO:0044699//single-organism process;GO:0012501//programmed cell death;GO:0009987//cellular process;GO:0044763//single-organism cellular process;GO:0008219//cell death
XM_013094319.3	3.22	2.27	3.31	3.88	3.93	10.66	12.89	15.79	205.38	78.93	193.14	221.14	130.7	859.14	715.75	1069.24	-1.77081	0.00238432	0.0436801	Pde1c	PREDICTED: calcium/calmodulin-dependent 3',5'-cyclic nucleotide phosphodiesterase 1C isoform X2 [Anas platyrhynchos]	Environmental Information Processing;Human Diseases;Organismal Systems;Metabolism	Sensory system;Signal transduction;Endocrine system;Nucleotide metabolism;Substance dependence	ko04020//Calcium signaling pathway;ko04740//Olfactory transduction;ko00230//Purine metabolism;ko04924//Renin secretion;ko05032//Morphine addiction;ko04742//Taste transduction	K13755	GO:0005623//cell;GO:0044464//cell part;GO:0042995//cell projection	GO:0016787//hydrolase activity;GO:0042578//phosphoric ester hydrolase activity;GO:0016788//hydrolase activity, acting on ester bonds;GO:0003824//catalytic activity;GO:0043169//cation binding;GO:0043167//ion binding;GO:0005488//binding	GO:0003008//system process;GO:0050789//regulation of biological process;GO:0050877//neurological system process;GO:0007600//sensory perception;GO:0032501//multicellular organismal process;GO:0050794//regulation of cellular process;GO:0065007//biological regulation;GO:0007606//sensory perception of chemical stimulus
XM_013095709.3	0	0	0	0	0	0.21	0.3	0	0	0	0	0	0	89.44	89.47	0	-6.99435	0.00827936	0.133975	HIVEP3	PREDICTED: transcription factor HIVEP3 isoform X1 [Anas platyrhynchos]	-	-	-	-	GO:0043231//intracellular membrane-bounded organelle;GO:0043227//membrane-bounded organelle;GO:0043226//organelle;GO:0044464//cell part;GO:0005622//intracellular;GO:0005623//cell;GO:0043229//intracellular organelle;GO:0044424//intracellular part	GO:0043167//ion binding;GO:0003676//nucleic acid binding;GO:0043169//cation binding;GO:1901363//heterocyclic compound binding;GO:0005488//binding;GO:0097159//organic cyclic compound binding	GO:0060537//muscle tissue development;GO:0060538//skeletal muscle organ development;GO:0050794//regulation of cellular process;GO:2001141//regulation of RNA biosynthetic process;GO:0048856//anatomical structure development;GO:0007519//skeletal muscle tissue development;GO:0050789//regulation of biological process;GO:0044767//single-organism developmental process;GO:0006355//regulation of transcri…
XM_013095710.3	0.25	0.46	0	0	0	0	0	0	84.98	85.02	0	0	0	0	0	0	7.47168	0.00577293	0.133975	HIVEP3	PREDICTED: transcription factor HIVEP3 isoform X1 [Anas platyrhynchos]	-	-	-	-	GO:0044464//cell part;GO:0043226//organelle;GO:0005622//intracellular;GO:0043231//intracellular membrane-bounded organelle;GO:0043229//intracellular organelle;GO:0005623//cell;GO:0044424//intracellular part;GO:0043227//membrane-bounded organelle	GO:0097159//organic cyclic compound binding;GO:0003676//nucleic acid binding;GO:0005488//binding;GO:0043169//cation binding;GO:0043167//ion binding;GO:1901363//heterocyclic compound binding	GO:0006355//regulation of transcription, DNA-templated;GO:2000112//regulation of cellular macromolecule biosynthetic process;GO:0050794//regulation of cellular process;GO:0060538//skeletal muscle organ development;GO:0044707//single-multicellular organism process;GO:0048513//animal organ development;GO:1903506//regulation of nucleic acid-templated transcription;GO:0048856//anatomical structure de…
XM_013095734.3	7.61	14.38	10.66	10.73	3.57	6.4	4.37	3.95	916.37	940.99	1173.76	1151.91	223.47	972.32	457.75	504.06	1.24597	0.00297304	0.0251934	ZNF521	PREDICTED: zinc finger protein 521 isoform X3 [Anas platyrhynchos]	-	-	-	-	-	GO:0005488//binding	-
XM_013096464.3	10.29	4.52	6.07	6.92	14.71	9.47	18.63	23.5	802.83	191.81	433.04	481.79	597.11	932.4	1264.3	1945.17	-1.25414	0.0054156	0.0651792	CCDC92	PREDICTED: coiled-coil domain-containing protein 92 isoform X1 [Anas platyrhynchos]	-	-	-	-	-	-	-
XM_013096641.3	0	0	5.13	0.64	0	0	0	0	0	0	171.31	20.84	0	0	0	0	10.4944	0.00694243	0.289818	Tmem144	PREDICTED: transmembrane protein 144 isoform X1 [Anas platyrhynchos]	-	-	-	-	-	-	-
XM_013097146.3	0	0	0	0	0	0	2.63	1.29	0	0	0	0	0	0	99.49	59.75	-9.93664	0.00879102	0.153522	NTRK3	PREDICTED: NT-3 growth factor receptor isoform X6 [Anas platyrhynchos]	Human Diseases;Organismal Systems	Cancers;Nervous system	ko04722//Neurotrophin signaling pathway;ko05230//Central carbon metabolism in cancer	K05101	GO:0044424//intracellular part;GO:0016021//integral component of membrane;GO:0005622//intracellular;GO:0032991//macromolecular complex;GO:0005623//cell;GO:0031224//intrinsic component of membrane;GO:0044464//cell part;GO:0043234//protein complex;GO:0016020//membrane;GO:0044425//membrane part	GO:0001883//purine nucleoside binding;GO:0097367//carbohydrate derivative binding;GO:0004713//protein tyrosine kinase activity;GO:0036094//small molecule binding;GO:0005488//binding;GO:0032550//purine ribonucleoside binding;GO:0004871//signal transducer activity;GO:0060089//molecular transducer activity;GO:0016301//kinase activity;GO:0038023//signaling receptor activity;GO:0032549//ribonucleoside…	GO:0051240//positive regulation of multicellular organismal process;GO:0051962//positive regulation of nervous system development;GO:2000026//regulation of multicellular organismal development;GO:0022604//regulation of cell morphogenesis;GO:0048520//positive regulation of behavior;GO:0044700//single organism signaling;GO:0050794//regulation of cellular process;GO:0050789//regulation of biological…
XM_013097447.3	0	0	0	0	0.68	0.39	0.48	0.45	0	0	0	0	43.61	61.13	51.85	59.14	-8.96578	4.12e-05	9.98e-06	USP6NL	PREDICTED: USP6 N-terminal-like protein isoform X2 [Anas platyrhynchos]	-	-	-	-	GO:0031982//vesicle;GO:0043226//organelle	GO:0017016//Ras GTPase binding;GO:0005488//binding;GO:0019899//enzyme binding;GO:0031267//small GTPase binding;GO:0005515//protein binding;GO:0051020//GTPase binding	GO:0050794//regulation of cellular process;GO:0051704//multi-organism process;GO:0016032//viral process;GO:0044419//interspecies interaction between organisms;GO:0006810//transport;GO:0051128//regulation of cellular component organization;GO:0044403//symbiosis, encompassing mutualism through parasitism;GO:0044764//multi-organism cellular process;GO:0033043//regulation of organelle organization;GO…
XM_013098551.2	1.89	3.34	1.45	2.2	0.07	0.22	0.34	0.67	482.34	462.58	338.32	500.42	9.08	72.11	76.36	181.38	2.77205	0.000262158	0.000405654	ANK2	PREDICTED: ankyrin-2 isoform X1 [Anas platyrhynchos]	Human Diseases	Cancers	ko05205//Proteoglycans in cancer	K10380	-	-	-
XM_013098911.3	3.24	5.28	1.29	1.23	0	0	0	0	173.86	154.07	63.31	58.86	0	0	0	0	11.4305	1.73e-07	0.00948106	SCG5	PREDICTED: neuroendocrine protein 7B2 isoform X1 [Anas platyrhynchos]	-	-	-	-	GO:0012505//endomembrane system;GO:0005623//cell;GO:0044464//cell part	GO:0005515//protein binding;GO:0005488//binding	GO:0071702//organic substance transport;GO:0071704//organic substance metabolic process;GO:0050794//regulation of cellular process;GO:0008152//metabolic process;GO:0007186//G-protein coupled receptor signaling pathway;GO:0065007//biological regulation;GO:0044763//single-organism cellular process;GO:0009892//negative regulation of metabolic process;GO:0007165//signal transduction;GO:0023052//signa…
XM_013099002.3	0	0	0	0	0.99	1.15	1.51	0.46	0	0	0	0	48.02	134.07	121.94	45.04	-10.0049	3.64e-06	0.0102236	SPRED1	PREDICTED: sprouty-related, EVH1 domain-containing protein 1 isoform X3 [Anas platyrhynchos]	-	-	-	-	GO:0005622//intracellular;GO:0043226//organelle;GO:0043231//intracellular membrane-bounded organelle;GO:0043227//membrane-bounded organelle;GO:0044424//intracellular part;GO:0043229//intracellular organelle;GO:0005623//cell;GO:0044464//cell part	GO:0005488//binding;GO:0019210//kinase inhibitor activity;GO:0098772//molecular function regulator;GO:0019900//kinase binding;GO:0030234//enzyme regulator activity;GO:0005515//protein binding;GO:0019207//kinase regulator activity;GO:0019899//enzyme binding;GO:0004860//protein kinase inhibitor activity;GO:0005102//receptor binding;GO:0005126//cytokine receptor binding;GO:0004857//enzyme inhibitor …	GO:0044699//single-organism process;GO:0065009//regulation of molecular function;GO:0043516//regulation of DNA damage response, signal transduction by p53 class mediator;GO:0048583//regulation of response to stimulus;GO:0051246//regulation of protein metabolic process;GO:0010646//regulation of cell communication;GO:0050789//regulation of biological process;GO:0051174//regulation of phosphorus met…
XM_013099086.2	0	5.65	0	0	0	0	0	0	0.42	413.39	0	0	0	0	0	0	10.464	0.00178978	0.355314	CARD19	PREDICTED: bcl10-interacting CARD protein isoform X1 [Anas platyrhynchos]	-	-	-	-	GO:0005623//cell;GO:0043226//organelle;GO:0043229//intracellular organelle;GO:0043231//intracellular membrane-bounded organelle;GO:0044424//intracellular part;GO:0005622//intracellular;GO:0044464//cell part;GO:0043227//membrane-bounded organelle	-	GO:0016265//death;GO:0012501//programmed cell death;GO:0009987//cellular process;GO:0044763//single-organism cellular process;GO:0044699//single-organism process;GO:0008219//cell death;GO:0006915//apoptotic process
XM_013099469.3	83.46	2.39	0	0	0.46	0	0	0	16963.2	264.35	0.21	0	48.3	0	0	0	7.54404	0.00754293	0.347989	FBN1	PREDICTED: fibrillin-1 isoform X2 [Anas platyrhynchos]	-	-	-	-	-	-	-
XM_013099534.3	0.31	0	0.7	0.05	0	0	0	0	29.66	0	60.69	4.63	0	0	0	0	8.04985	0.00846549	0.139196	HERC3	PREDICTED: probable E3 ubiquitin-protein ligase HERC3 [Anas platyrhynchos]	Genetic Information Processing	Folding, sorting and degradation	ko04120//Ubiquitin mediated proteolysis	K10614	-	-	-
XM_013099607.3	0	0	0	0	0.28	0.83	0	0.23	0	0	0	0	14.69	106.88	0	24.75	-8.38802	0.00459205	0.177964	CDON	PREDICTED: cell adhesion molecule-related/down-regulated by oncogenes isoform X1 [Anas platyrhynchos]	Environmental Information Processing	Signal transduction	ko04340//Hedgehog signaling pathway	K20033	-	-	GO:0048518//positive regulation of biological process;GO:0048699//generation of neurons;GO:0048869//cellular developmental process;GO:1902531//regulation of intracellular signal transduction;GO:0051716//cellular response to stimulus;GO:0006949//syncytium formation;GO:0016202//regulation of striated muscle tissue development;GO:0007154//cell communication;GO:0010562//positive regulation of phospho…
XM_013099804.3	0	0	0	0	0.94	3.86	0	0	0.08	0	0	0	31.39	312.17	0	0	-10.2288	0.00338368	0.300442	NAP1L4	PREDICTED: nucleosome assembly protein 1-like 4 isoform X1 [Anas platyrhynchos]	-	-	-	-	-	GO:0003723//RNA binding;GO:1901363//heterocyclic compound binding;GO:0003676//nucleic acid binding;GO:0005488//binding;GO:0097159//organic cyclic compound binding	GO:0006996//organelle organization;GO:0034728//nucleosome organization;GO:0016043//cellular component organization;GO:0006325//chromatin organization;GO:0071822//protein complex subunit organization;GO:0009987//cellular process;GO:0043933//macromolecular complex subunit organization;GO:0071824//protein-DNA complex subunit organization;GO:0051276//chromosome organization;GO:0071840//cellular compo…
XM_013100990.3	0	1.91	0.68	0	0	0	0	0	0	158.64	94.98	0	0	0	0	0	9.33874	0.00192821	0.153744	TNFAIP1	PREDICTED: BTB/POZ domain-containing adapter for CUL3-mediated RhoA degradation protein 2 [Anas platyrhynchos]	-	-	-	-	GO:0043234//protein complex;GO:0043228//non-membrane-bounded organelle;GO:0031461//cullin-RING ubiquitin ligase complex;GO:0043231//intracellular membrane-bounded organelle;GO:0043229//intracellular organelle;GO:0043232//intracellular non-membrane-bounded organelle;GO:0043227//membrane-bounded organelle;GO:0005623//cell;GO:0044424//intracellular part;GO:0044464//cell part;GO:0032991//macromolecul…	GO:0016740//transferase activity;GO:0031267//small GTPase binding;GO:0017016//Ras GTPase binding;GO:0005515//protein binding;GO:0019899//enzyme binding;GO:0003824//catalytic activity;GO:0017048//Rho GTPase binding;GO:0005488//binding;GO:0051020//GTPase binding;GO:0019787//ubiquitin-like protein transferase activity	GO:0070647//protein modification by small protein conjugation or removal;GO:0006807//nitrogen compound metabolic process;GO:0032502//developmental process;GO:0019538//protein metabolic process;GO:0050789//regulation of biological process;GO:0071822//protein complex subunit organization;GO:0044267//cellular protein metabolic process;GO:0009966//regulation of signal transduction;GO:0050794//regulat…
XM_013101354.3	0	0	0	0	0	0	0.7	0.19	0	0	0	0	0	0	135.8	44.58	-7.79766	0.00699108	0.208542	PPARA	Peroxisome proliferator-activated receptor alpha, partial [Anas platyrhynchos]	Human Diseases;Organismal Systems;Environmental Information Processing	Endocrine system;Endocrine and metabolic diseases;Infectious diseases;Signal transduction	ko04024//cAMP signaling pathway;ko04922//Glucagon signaling pathway;ko05160//Hepatitis C;ko04931//Insulin resistance;ko04932//Non-alcoholic fatty liver disease (NAFLD);ko03320//PPAR signaling pathway;ko04920//Adipocytokine signaling pathway	K07294	GO:0043226//organelle;GO:0005623//cell;GO:0043227//membrane-bounded organelle;GO:0005622//intracellular;GO:0043229//intracellular organelle;GO:0044464//cell part;GO:0043231//intracellular membrane-bounded organelle;GO:0044424//intracellular part	GO:0004872//receptor activity;GO:0001076//transcription factor activity, RNA polymerase II transcription factor binding;GO:0000988//transcription factor activity, protein binding;GO:0038023//signaling receptor activity;GO:0044390//ubiquitin-like protein conjugating enzyme binding;GO:0003676//nucleic acid binding;GO:0000981//RNA polymerase II transcription factor activity, sequence-specific DNA bi…	GO:0071495//cellular response to endogenous stimulus;GO:0006357//regulation of transcription from RNA polymerase II promoter;GO:0010628//positive regulation of gene expression;GO:0051173//positive regulation of nitrogen compound metabolic process;GO:0032102//negative regulation of response to external stimulus;GO:0048511//rhythmic process;GO:0051252//regulation of RNA metabolic process;GO:0032104…
XM_013101396.3	0	0	0	0	1.25	0.6	0	0.18	0	0	0	0	47.42	55.39	0	14.21	-8.98726	0.00419953	0.068764	PARP12	PREDICTED: poly [ADP-ribose] polymerase 12-like [Anas platyrhynchos]	-	-	-	-	-	-	-
XM_013105184.3	0.91	1.09	0	0.9	0	0	0	0	30.81	20	0	27	0	0	0	0	9.50184	0.00822587	0.0297309	CENPP	PREDICTED: centromere protein P [Anas platyrhynchos]	-	-	-	-	GO:0043227//membrane-bounded organelle;GO:0043229//intracellular organelle;GO:0043228//non-membrane-bounded organelle;GO:0044424//intracellular part;GO:0044464//cell part;GO:0005623//cell;GO:0043226//organelle;GO:0043231//intracellular membrane-bounded organelle;GO:0005622//intracellular;GO:0043232//intracellular non-membrane-bounded organelle	-	GO:0071824//protein-DNA complex subunit organization;GO:0006338//chromatin remodeling;GO:0006325//chromatin organization;GO:0009987//cellular process;GO:0034728//nucleosome organization;GO:0016568//chromatin modification;GO:0016043//cellular component organization;GO:0051276//chromosome organization;GO:0043044//ATP-dependent chromatin remodeling;GO:0043933//macromolecular complex subunit organiza…
XM_013105747.3	0.35	1.09	0.78	0.8	0	0	0	0	33.56	55.82	67.29	67.24	0	0	0	0	9.56033	2.23e-05	0.000408674	NCOA4	PREDICTED: nuclear receptor coactivator 4 isoform X2 [Anas platyrhynchos]	Cellular Processes;Human Diseases	Cancers;Cell growth and death	ko05200//Pathways in cancer;ko04216//Ferroptosis;ko05216//Thyroid cancer	K09289	-	-	-
XM_013106067.3	0	0	0	0	1.11	0	2.47	0	0	0	0	0	47.85	0	177.29	0	-9.80574	0.00375752	0.227572	EVI5	PREDICTED: ecotropic viral integration site 5 protein homolog isoform X8 [Anas platyrhynchos]	-	-	-	-	GO:0044424//intracellular part;GO:0005622//intracellular;GO:0005737//cytoplasm;GO:0044464//cell part;GO:0043226//organelle;GO:0005623//cell;GO:0044444//cytoplasmic part;GO:0043227//membrane-bounded organelle	GO:0051020//GTPase binding;GO:0005515//protein binding;GO:0017016//Ras GTPase binding;GO:0031267//small GTPase binding;GO:0005488//binding;GO:0019899//enzyme binding	GO:0006810//transport;GO:0051179//localization;GO:0051234//establishment of localization;GO:0016192//vesicle-mediated transport
XM_013106758.3	0	0	0	0	0.92	0.28	1.06	0	0	0	0	0	87.34	63.96	168.29	0	-9.14211	0.000155948	0.0612698	TSPAN4	PREDICTED: tetraspanin-4 isoform X5 [Anas platyrhynchos]	-	-	-	-	-	-	-
XM_013108053.3	0	1.45	2.06	5.27	0	0	0	0	0	29.68	70.7	176.65	0	0	0	0	11.1	0.000370945	0.123089	Rpp40	PREDICTED: ribonuclease P protein subunit p40 [Anas platyrhynchos]	Genetic Information Processing	Translation	ko03013//RNA transport;ko03008//Ribosome biogenesis in eukaryotes	K14530	-	-	-
XM_013108226.3	0	0	0	0	0.22	0	0.11	0.25	0	0	0	0	19.1	0	16.9	45.99	-7.17991	0.00831938	0.0745145	PLA2G4B	PREDICTED: cytosolic phospholipase A2 beta isoform X5 [Anas platyrhynchos]	Cellular Processes;Environmental Information Processing;Human Diseases;Metabolism;Organismal Systems	Global and overview maps;Circulatory system;Cell growth and death;Immune system;Sensory system;Cancers;Lipid metabolism;Endocrine system;Signal transduction;Nervous system	ko01100//Metabolic pathways;ko04010//MAPK signaling pathway;ko04014//Ras signaling pathway;ko04921//Oxytocin signaling pathway;ko04270//Vascular smooth muscle contraction;ko04072//Phospholipase D signaling pathway;ko04724//Glutamatergic synapse;ko04750//Inflammatory mediator regulation of TRP channels;ko04217//Necroptosis;ko04611//Platelet activation;ko04912//GnRH signaling pathway;ko00564//Glyce…	K16342	-	-	-
XM_013108996.3	0.23	0.35	0.04	0.13	1.9	1.59	0.56	1.7	22.96	18.96	3.81	11.49	99.35	201.21	49.14	181.69	-2.9386	0.00809042	0.0162296	PROKR1	PREDICTED: prokineticin receptor 2 isoform X1 [Anas platyrhynchos]	-	-	-	-	GO:0044425//membrane part;GO:0031224//intrinsic component of membrane;GO:0016020//membrane	GO:0099600//transmembrane receptor activity;GO:0004871//signal transducer activity;GO:0038023//signaling receptor activity;GO:0004888//transmembrane signaling receptor activity;GO:0004872//receptor activity;GO:0060089//molecular transducer activity	GO:0050794//regulation of cellular process;GO:0065007//biological regulation;GO:0007165//signal transduction;GO:0044763//single-organism cellular process;GO:0044700//single organism signaling;GO:0009987//cellular process;GO:0050789//regulation of biological process;GO:0007154//cell communication;GO:0044699//single-organism process;GO:0023052//signaling;GO:0050896//response to stimulus;GO:0007186/…
XM_013109667.2	0.7	1.09	0.47	0.75	0	0	0.03	0	39.56	33.79	24.44	38	0	0	1.29	0	6.64866	0.000842057	6.28e-05	BCO2	PREDICTED: beta,beta-carotene 9',10'-oxygenase isoform X2 [Anas platyrhynchos]	-	-	-	-	-	GO:0016491//oxidoreductase activity;GO:0016701//oxidoreductase activity, acting on single donors with incorporation of molecular oxygen;GO:0003824//catalytic activity	GO:0065008//regulation of biological quality;GO:0016119//carotene metabolic process;GO:0019222//regulation of metabolic process;GO:0044238//primary metabolic process;GO:0006721//terpenoid metabolic process;GO:0006720//isoprenoid metabolic process;GO:0008152//metabolic process;GO:0042391//regulation of membrane potential;GO:0009987//cellular process;GO:0044237//cellular metabolic process;GO:000662…
XM_013109676.2	0.71	0	0	0.88	0	0	0	0	110.3	0	0	122.78	0	0	0	0.01	8.63481	0.00409081	0.134907	NCAM1	PREDICTED: neural cell adhesion molecule 1 isoform X2 [Anas platyrhynchos]	Human Diseases;Environmental Information Processing	Signaling molecules and interaction;Neurodegenerative diseases	ko04514//Cell adhesion molecules (CAMs);ko05020//Prion diseases	K06491	GO:0030054//cell junction;GO:0097458//neuron part;GO:0044297//cell body;GO:0005623//cell;GO:0042995//cell projection;GO:0031224//intrinsic component of membrane;GO:0005886//plasma membrane;GO:0043005//neuron projection;GO:0071944//cell periphery;GO:0044459//plasma membrane part;GO:0044464//cell part;GO:0016020//membrane;GO:0044425//membrane part	-	GO:0048583//regulation of response to stimulus;GO:0065007//biological regulation;GO:0071840//cellular component organization or biogenesis;GO:0022610//biological adhesion;GO:0009987//cellular process;GO:0023051//regulation of signaling;GO:1902531//regulation of intracellular signal transduction;GO:0016337//single organismal cell-cell adhesion;GO:0044763//single-organism cellular process;GO:005078…
XM_013109679.2	0.54	0.57	0	0	0	0	0	0	99.94	57.49	0	0	0	0	0	0	8.11634	0.00783021	0.156709	NCAM1	PREDICTED: neural cell adhesion molecule 1 isoform X4 [Anas platyrhynchos]	Environmental Information Processing;Human Diseases	Neurodegenerative diseases;Signaling molecules and interaction	ko04514//Cell adhesion molecules (CAMs);ko05020//Prion diseases	K06491	GO:0005623//cell;GO:0044297//cell body;GO:0044459//plasma membrane part;GO:0043005//neuron projection;GO:0030054//cell junction;GO:0016020//membrane;GO:0042995//cell projection;GO:0044425//membrane part;GO:0071944//cell periphery;GO:0005886//plasma membrane;GO:0097458//neuron part;GO:0031224//intrinsic component of membrane;GO:0044464//cell part	-	GO:0071840//cellular component organization or biogenesis;GO:0009966//regulation of signal transduction;GO:0016337//single organismal cell-cell adhesion;GO:0065007//biological regulation;GO:0010646//regulation of cell communication;GO:0044763//single-organism cellular process;GO:0050789//regulation of biological process;GO:0098609//cell-cell adhesion;GO:0050794//regulation of cellular process;GO:…
XM_021267097.2	0	0	0	0	0	0	6.77	2.67	0.03	0.02	0.03	0.03	0	0.04	541.52	260.36	-11.2046	0.000124908	0.171723	CGNL1	Cingulin-like protein 1, partial [Anas platyrhynchos]	Cellular Processes	Cellular community - eukaryotes	ko04530//Tight junction	K21110	GO:0043296//apical junction complex;GO:0043229//intracellular organelle;GO:0043232//intracellular non-membrane-bounded organelle;GO:0005623//cell;GO:0015629//actin cytoskeleton;GO:0043228//non-membrane-bounded organelle;GO:0005911//cell-cell junction;GO:0030054//cell junction;GO:0005622//intracellular;GO:0043226//organelle;GO:0044424//intracellular part;GO:0005856//cytoskeleton;GO:0044464//cell p…	-	-
XM_021267374.2	3.09	0.23	1.69	0.3	0.1	0.01	0	0	289.57	11.52	144.86	25.35	4.97	1.17	0	0.16	5.59314	0.00128062	0.122085	FBXO25	PREDICTED: F-box only protein 25 isoform X3 [Leptosomus discolor]	Environmental Information Processing	Signal transduction	ko04068//FoxO signaling pathway	K10305	-	-	-
XM_021267656.2	0	0	0	0	0.27	0	0.3	0.27	0	0	0	0	16.45	0	30.53	32.78	-7.71425	0.0082137	0.0387611	AASDH	PREDICTED: acyl-CoA synthetase family member 4 isoform X1 [Anas platyrhynchos]	-	-	-	-	-	-	-
XM_021268759.2	1.8	0.82	0	0.61	0	0	0	0	343.34	84.59	0	103.94	0	0	0	0	9.65732	2.53e-05	0.121109	Klhl24	PREDICTED: kelch-like protein 24 [Anas platyrhynchos]	-	-	-	-	-	-	-
XM_021268952.2	0.44	0.95	0.18	0	0	0	0	0	39.86	46.9	15.18	0	0	0	0	0	8.61655	0.00434857	0.0576845	Kmt5b	PREDICTED: histone-lysine N-methyltransferase SUV420H1 [Anas platyrhynchos]	Metabolism	Amino acid metabolism	ko00310//Lysine degradation	K11429	-	GO:0016740//transferase activity;GO:0003824//catalytic activity;GO:0008168//methyltransferase activity;GO:0008757//S-adenosylmethionine-dependent methyltransferase activity;GO:0016278//lysine N-methyltransferase activity;GO:0008170//N-methyltransferase activity;GO:0016279//protein-lysine N-methyltransferase activity;GO:0008276//protein methyltransferase activity;GO:0042054//histone methyltransfer…	GO:0044260//cellular macromolecule metabolic process;GO:1902589//single-organism organelle organization;GO:0006325//chromatin organization;GO:0018023//peptidyl-lysine trimethylation;GO:0034968//histone lysine methylation;GO:0032259//methylation;GO:0044237//cellular metabolic process;GO:0044238//primary metabolic process;GO:0044710//single-organism metabolic process;GO:0018205//peptidyl-lysine mod…
XM_021269094.2	0.33	0	0.61	0.12	0	0	0	0	50.84	0	84.61	16.02	0	0	0	0	8.04985	0.00255006	0.0913113	MRVI1	PREDICTED: protein MRVI1 isoform X1 [Anas platyrhynchos]	Environmental Information Processing;Organismal Systems	Circulatory system;Signal transduction	ko04022//cGMP - PKG signaling pathway;ko04270//Vascular smooth muscle contraction	K12337	-	-	GO:0006940//regulation of smooth muscle contraction;GO:0090075//relaxation of muscle;GO:0065007//biological regulation;GO:0044057//regulation of system process;GO:0006937//regulation of muscle contraction;GO:0044557//relaxation of smooth muscle;GO:0051239//regulation of multicellular organismal process;GO:0003012//muscle system process;GO:0032501//multicellular organismal process;GO:0090257//regu…
XM_021269249.2	0	0.83	0	0.48	0	0	0	0	0	102.45	0	97.89	0	0	0	0	8.35535	0.00364055	0.134141	THSD7A	PREDICTED: thrombospondin type-1 domain-containing protein 7A isoform X1 [Anas platyrhynchos]	-	-	-	-	-	-	-
XM_021269399.2	1.37	4.05	0	0	0	0	0	0	157.41	252.52	0	0	0	0	0	0	10.4041	0.000576245	0.150922	PLA2G4A	PREDICTED: cytosolic phospholipase A2 isoform X1 [Anas platyrhynchos]	Cellular Processes;Environmental Information Processing;Metabolism;Organismal Systems;Human Diseases	Global and overview maps;Circulatory system;Cell growth and death;Immune system;Sensory system;Cancers;Lipid metabolism;Endocrine system;Signal transduction;Nervous system	ko01100//Metabolic pathways;ko04010//MAPK signaling pathway;ko04014//Ras signaling pathway;ko04921//Oxytocin signaling pathway;ko04270//Vascular smooth muscle contraction;ko04072//Phospholipase D signaling pathway;ko04724//Glutamatergic synapse;ko04750//Inflammatory mediator regulation of TRP channels;ko04217//Necroptosis;ko04611//Platelet activation;ko04912//GnRH signaling pathway;ko00564//Glyce…	K16342	GO:0044424//intracellular part;GO:0043231//intracellular membrane-bounded organelle;GO:0044444//cytoplasmic part;GO:0043227//membrane-bounded organelle;GO:0043226//organelle;GO:0005623//cell;GO:0044464//cell part;GO:0043229//intracellular organelle;GO:0005737//cytoplasm;GO:0005622//intracellular	GO:0052689//carboxylic ester hydrolase activity;GO:0005488//binding;GO:0016298//lipase activity;GO:0046872//metal ion binding;GO:0004623//phospholipase A2 activity;GO:0005543//phospholipid binding;GO:0003824//catalytic activity;GO:0004620//phospholipase activity;GO:0043169//cation binding;GO:0008289//lipid binding;GO:0043167//ion binding;GO:0016788//hydrolase activity, acting on ester bonds;GO:00…	GO:0044699//single-organism process;GO:0015849//organic acid transport;GO:0071704//organic substance metabolic process;GO:0006082//organic acid metabolic process;GO:0008152//metabolic process;GO:0046717//acid secretion;GO:0044238//primary metabolic process;GO:0019637//organophosphate metabolic process;GO:0019752//carboxylic acid metabolic process;GO:0046677//response to antibiotic;GO:0044281//sma…
XM_021271940.2	1.22	0.85	0.53	0	0	0	0	0	99.54	37.91	39.95	0	0	0	0	0	9.3443	0.00131971	0.0743984	THNSL1	PREDICTED: threonine synthase-like 1 isoform X1 [Anas platyrhynchos]	-	-	-	-	GO:0005623//cell;GO:0043226//organelle;GO:0043229//intracellular organelle;GO:0044424//intracellular part;GO:0044464//cell part;GO:0043231//intracellular membrane-bounded organelle;GO:0043227//membrane-bounded organelle;GO:0005622//intracellular	GO:0005488//binding;GO:0043167//ion binding;GO:0043168//anion binding	GO:0006082//organic acid metabolic process;GO:0044710//single-organism metabolic process;GO:0009987//cellular process;GO:0043436//oxoacid metabolic process;GO:0019752//carboxylic acid metabolic process;GO:0008152//metabolic process;GO:0044699//single-organism process;GO:0071704//organic substance metabolic process;GO:0044281//small molecule metabolic process;GO:0044237//cellular metabolic process…
XM_021271966.2	0.18	0.09	0.31	0.06	0	0	0	0	15.83	4.37	24.33	4.75	0	0	0	0	7.32193	0.00784872	0.0426815	ASB3	PREDICTED: ankyrin repeat and SOCS box protein 3 [Anas platyrhynchos]	-	-	-	-	-	-	-
XM_021273157.2	0	0	0	0	0.22	0.23	0.05	0.06	0	0	0	0	34.27	85.51	12.38	17.45	-7.12928	0.000489282	0.0664288	MICAL3	PREDICTED: protein-methionine sulfoxide oxidase MICAL3 isoform X1 [Anas platyrhynchos]	-	-	-	-	-	-	-
XM_021273244.2	0	0	17.92	0	0	0	0	0	0	0.18	2236.43	0.01	0.29	0.41	0.35	0.06	12.1293	0.000212162	0.356089	RCOR1	PREDICTED: REST corepressor 1 [Anas platyrhynchos]	-	-	-	-	GO:0044464//cell part;GO:0044424//intracellular part;GO:0043229//intracellular organelle;GO:0043234//protein complex;GO:0043226//organelle;GO:0043227//membrane-bounded organelle;GO:0005623//cell;GO:0043231//intracellular membrane-bounded organelle;GO:0032991//macromolecular complex;GO:0005622//intracellular	GO:0001067//regulatory region nucleic acid binding;GO:0003676//nucleic acid binding;GO:1901363//heterocyclic compound binding;GO:0005488//binding;GO:0000975//regulatory region DNA binding;GO:0000982//transcription factor activity, RNA polymerase II core promoter proximal region sequence-specific binding;GO:0097159//organic cyclic compound binding;GO:0003700//transcription factor activity, sequenc…	GO:2000026//regulation of multicellular organismal development;GO:0051240//positive regulation of multicellular organismal process;GO:0010556//regulation of macromolecule biosynthetic process;GO:0045597//positive regulation of cell differentiation;GO:0036211//protein modification process;GO:0006464//cellular protein modification process;GO:1903708//positive regulation of hemopoiesis;GO:1903706//r…
XM_021274173.2	0	0.96	0.61	0	0	0	0	0	0	93.37	100.5	0	0	0	0	0	8.61655	0.00407086	0.134408	HIPK3	PREDICTED: homeodomain-interacting protein kinase 3 isoform X2 [Anas platyrhynchos]	Cellular Processes	Cell growth and death	ko04218//Cellular senescence	K08826	GO:0043233//organelle lumen;GO:0044424//intracellular part;GO:0044422//organelle part;GO:0005634//nucleus;GO:0043229//intracellular organelle;GO:0005622//intracellular;GO:0005623//cell;GO:0016604//nuclear body;GO:0043231//intracellular membrane-bounded organelle;GO:0031981//nuclear lumen;GO:0043226//organelle;GO:0031974//membrane-enclosed lumen;GO:0043227//membrane-bounded organelle;GO:0044428//n…	GO:0097159//organic cyclic compound binding;GO:0005488//binding;GO:0016772//transferase activity, transferring phosphorus-containing groups;GO:0001883//purine nucleoside binding;GO:1901363//heterocyclic compound binding;GO:0032549//ribonucleoside binding;GO:0001882//nucleoside binding;GO:0003824//catalytic activity;GO:0016740//transferase activity;GO:0036094//small molecule binding;GO:0097367//ca…	GO:0008152//metabolic process;GO:0050794//regulation of cellular process;GO:0009966//regulation of signal transduction;GO:0046483//heterocycle metabolic process;GO:0043408//regulation of MAPK cascade;GO:1902531//regulation of intracellular signal transduction;GO:0051338//regulation of transferase activity;GO:0001932//regulation of protein phosphorylation;GO:1901362//organic cyclic compound biosyn…
XM_021274275.2	0.02	0	0.41	0.98	0.79	1.38	1.29	52.81	2.05	0	39.26	92.09	43.24	183.93	117.93	5900.45	-5.3186	0.000410481	0.331558	CACNB4	Voltage-dependent L-type calcium channel subunit beta-4 [Heterocephalus glaber]	Human Diseases;Organismal Systems;Environmental Information Processing	Signal transduction;Cardiovascular diseases;Circulatory system;Endocrine system	ko04010//MAPK signaling pathway;ko04921//Oxytocin signaling pathway;ko04261//Adrenergic signaling in cardiomyocytes;ko05412//Arrhythmogenic right ventricular cardiomyopathy (ARVC);ko05410//Hypertrophic cardiomyopathy (HCM);ko05414//Dilated cardiomyopathy (DCM);ko04260//Cardiac muscle contraction	K04865	GO:0031224//intrinsic component of membrane;GO:0016020//membrane;GO:1990351//transporter complex;GO:0034703//cation channel complex;GO:0016021//integral component of membrane;GO:1902495//transmembrane transporter complex;GO:0034702//ion channel complex;GO:0034704//calcium channel complex;GO:0032991//macromolecular complex;GO:0098796//membrane protein complex;GO:0044425//membrane part;GO:0043234//…	GO:0046873//metal ion transmembrane transporter activity;GO:0022832//voltage-gated channel activity;GO:0005262//calcium channel activity;GO:0022890//inorganic cation transmembrane transporter activity;GO:0005215//transporter activity;GO:0022803//passive transmembrane transporter activity;GO:0022838//substrate-specific channel activity;GO:0015085//calcium ion transmembrane transporter activity;GO:…	GO:0044281//small molecule metabolic process;GO:0043269//regulation of ion transport;GO:0007626//locomotory behavior;GO:0007267//cell-cell signaling;GO:0002376//immune system process;GO:0055002//striated muscle cell development;GO:0002684//positive regulation of immune system process;GO:0007601//visual perception;GO:0061061//muscle structure development;GO:0003008//system process;GO:0032502//deve…
XM_021274822.2	1.17	0	1.19	0	0	0	0	0	95.98	0	88.98	0	0	0	0	0	9.20457	0.0068756	0.134434	RECQL	PREDICTED: ATP-dependent DNA helicase Q1 [Anas platyrhynchos]	-	-	-	-	GO:0044464//cell part;GO:0043226//organelle;GO:0044424//intracellular part;GO:0005622//intracellular;GO:0043229//intracellular organelle;GO:0043231//intracellular membrane-bounded organelle;GO:0043227//membrane-bounded organelle;GO:0005623//cell	GO:0036094//small molecule binding;GO:0016887//ATPase activity;GO:0016462//pyrophosphatase activity;GO:0001883//purine nucleoside binding;GO:0004386//helicase activity;GO:0003824//catalytic activity;GO:0042623//ATPase activity, coupled;GO:0005488//binding;GO:1901363//heterocyclic compound binding;GO:0032549//ribonucleoside binding;GO:0001882//nucleoside binding;GO:0097367//carbohydrate derivative…	GO:0016043//cellular component organization;GO:0071840//cellular component organization or biogenesis;GO:0044237//cellular metabolic process;GO:0006807//nitrogen compound metabolic process;GO:0043170//macromolecule metabolic process;GO:0032392//DNA geometric change;GO:0006259//DNA metabolic process;GO:1901360//organic cyclic compound metabolic process;GO:0008152//metabolic process;GO:0071103//DNA…
XM_021275387.2	10.14	6.81	2.78	5.51	8.59	17.8	20.49	21.83	626.16	228.73	156.89	303.32	276.1	1387.33	1101.15	1430.33	-1.44481	0.0045624	0.0460082	selenbp1-a	PREDICTED: selenium-binding protein 1-A isoform X1 [Anas platyrhynchos]	-	-	-	-	-	-	-
XM_021275467.2	0	6.56	1.37	1.45	0	0	0	0	0	114.9	40.4	41.63	0	0	0	0	11.1954	0.000599763	0.0853708	PDSS1	Decaprenyl-diphosphate synthase subunit 1, partial [Anas platyrhynchos]	Metabolism	Metabolism of terpenoids and polyketides	ko00900//Terpenoid backbone biosynthesis	K12504	GO:0005623//cell;GO:0043227//membrane-bounded organelle;GO:0043226//organelle;GO:0044424//intracellular part;GO:0044464//cell part;GO:0043231//intracellular membrane-bounded organelle;GO:0043229//intracellular organelle;GO:0005622//intracellular	GO:0016740//transferase activity;GO:0005488//binding;GO:0046983//protein dimerization activity;GO:0003824//catalytic activity;GO:0016765//transferase activity, transferring alkyl or aryl (other than methyl) groups;GO:0005515//protein binding	GO:0071822//protein complex subunit organization;GO:0006629//lipid metabolic process;GO:0044763//single-organism cellular process;GO:0044255//cellular lipid metabolic process;GO:0044237//cellular metabolic process;GO:0044699//single-organism process;GO:0071704//organic substance metabolic process;GO:0044238//primary metabolic process;GO:0065003//macromolecular complex assembly;GO:0008152//metabol…
XM_021275595.2	1.38	0	0	1.7	0	0	0	0	91.14	0	0	99.67	0	0	0	0	9.58871	0.00627786	0.134615	CNOT2	PREDICTED: CCR4-NOT transcription complex subunit 2 isoform X5 [Anser cygnoides domesticus]	Genetic Information Processing	Folding, sorting and degradation	ko03018//RNA degradation	K12605	GO:0043227//membrane-bounded organelle;GO:0005622//intracellular;GO:0005623//cell;GO:0032991//macromolecular complex;GO:0043229//intracellular organelle;GO:0043231//intracellular membrane-bounded organelle;GO:0043234//protein complex;GO:0044464//cell part;GO:0044424//intracellular part;GO:0043226//organelle	GO:0003824//catalytic activity;GO:0097159//organic cyclic compound binding;GO:0000175//3'-5'-exoribonuclease activity;GO:0003676//nucleic acid binding;GO:0004532//exoribonuclease activity;GO:1901363//heterocyclic compound binding;GO:0004518//nuclease activity;GO:0001221//transcription cofactor binding;GO:0001222//transcription corepressor binding;GO:0003677//DNA binding;GO:0016787//hydrolase acti…	GO:0008152//metabolic process;GO:0048583//regulation of response to stimulus;GO:0090501//RNA phosphodiester bond hydrolysis;GO:0006725//cellular aromatic compound metabolic process;GO:0034641//cellular nitrogen compound metabolic process;GO:0090305//nucleic acid phosphodiester bond hydrolysis;GO:0044087//regulation of cellular component biogenesis;GO:0044237//cellular metabolic process;GO:0043170…
XM_021275932.2	0	0	0	0	22.28	0	0.04	22.29	0	0	0	0.19	1174.91	0.02	3.68	2396.45	-13.4451	1.48e-07	0.1693	MATR3	PREDICTED: matrin-3 isoform X1 [Anas platyrhynchos]	-	-	-	-	GO:0005622//intracellular;GO:0043231//intracellular membrane-bounded organelle;GO:0043226//organelle;GO:0043227//membrane-bounded organelle;GO:0005623//cell;GO:0044424//intracellular part;GO:0043229//intracellular organelle;GO:0044464//cell part	GO:0003676//nucleic acid binding;GO:0046872//metal ion binding;GO:0043167//ion binding;GO:1901363//heterocyclic compound binding;GO:0005488//binding;GO:0003723//RNA binding;GO:0046914//transition metal ion binding;GO:0097159//organic cyclic compound binding;GO:0043169//cation binding	-
XM_021276662.2	0	0	0	0	0	0.29	0	1.35	0	0	0	0	0	48.12	0	191.5	-8.67948	0.00579354	0.234274	ZNF217	PREDICTED: zinc finger protein 217 [Anas platyrhynchos]	-	-	-	-	GO:0043226//organelle;GO:0043231//intracellular membrane-bounded organelle;GO:0044424//intracellular part;GO:0044446//intracellular organelle part;GO:0044422//organelle part;GO:0044428//nuclear part;GO:0031981//nuclear lumen;GO:0070013//intracellular organelle lumen;GO:0043233//organelle lumen;GO:0005623//cell;GO:0043227//membrane-bounded organelle;GO:0005634//nucleus;GO:0043229//intracellular or…	GO:0003677//DNA binding;GO:0043167//ion binding;GO:0005488//binding;GO:0097159//organic cyclic compound binding;GO:0003676//nucleic acid binding;GO:0043169//cation binding;GO:0000975//regulatory region DNA binding;GO:0001067//regulatory region nucleic acid binding;GO:1901363//heterocyclic compound binding	GO:0009889//regulation of biosynthetic process;GO:1903506//regulation of nucleic acid-templated transcription;GO:0050789//regulation of biological process;GO:2001141//regulation of RNA biosynthetic process;GO:0019222//regulation of metabolic process;GO:0031326//regulation of cellular biosynthetic process;GO:0019219//regulation of nucleobase-containing compound metabolic process;GO:0010556//regula…
XM_021276785.2	1.19	1.73	0	0.46	0	0	0	0	121.17	95.63	0	41.4	0	0	0	0	9.72281	0.000318387	0.0552446	SHLD2	PREDICTED: protein FAM35A isoform X1 [Anas platyrhynchos]	-	-	-	-	-	-	-
XM_021276838.2	1.44	2.15	0.41	0.63	0	0	0	0	328.46	266.3	84.96	127.91	0	0	0	0	10.1768	1.92e-10	0.0124051	ARNTL2	PREDICTED: aryl hydrocarbon receptor nuclear translocator-like protein 2 isoform X1 [Anas platyrhynchos]	-	-	-	-	GO:0043226//organelle;GO:0043229//intracellular organelle;GO:0043232//intracellular non-membrane-bounded organelle;GO:0044464//cell part;GO:0043231//intracellular membrane-bounded organelle;GO:0005623//cell;GO:0044424//intracellular part;GO:0032991//macromolecular complex;GO:0005622//intracellular;GO:0043234//protein complex;GO:0043228//non-membrane-bounded organelle;GO:0043227//membrane-bounded …	GO:0005488//binding;GO:0003676//nucleic acid binding;GO:0001067//regulatory region nucleic acid binding;GO:0005515//protein binding;GO:0003677//DNA binding;GO:0044212//transcription regulatory region DNA binding;GO:1901363//heterocyclic compound binding;GO:0001071//nucleic acid binding transcription factor activity;GO:0097159//organic cyclic compound binding;GO:0060089//molecular transducer activ…	GO:0006357//regulation of transcription from RNA polymerase II promoter;GO:0031323//regulation of cellular metabolic process;GO:0010468//regulation of gene expression;GO:0080090//regulation of primary metabolic process;GO:0065007//biological regulation;GO:0010556//regulation of macromolecule biosynthetic process;GO:2000112//regulation of cellular macromolecule biosynthetic process;GO:2001141//reg…
XM_021277344.2	0.24	0	1	0	0	0	0	0	39.68	0	149.35	0	0	0	0	0	8.27612	0.00687211	0.229061	ARNT2	PREDICTED: aryl hydrocarbon receptor nuclear translocator 2 isoform X4 [Anas platyrhynchos]	Human Diseases	Cancers	ko05200//Pathways in cancer;ko05202//Transcriptional misregulation in cancers;ko05211//Renal cell carcinoma	K15589	GO:0005623//cell;GO:0044464//cell part;GO:0043231//intracellular membrane-bounded organelle;GO:0043226//organelle;GO:0044424//intracellular part;GO:0043234//protein complex;GO:0043227//membrane-bounded organelle;GO:0043229//intracellular organelle;GO:0032991//macromolecular complex;GO:0005622//intracellular	GO:0060089//molecular transducer activity;GO:0001071//nucleic acid binding transcription factor activity;GO:0005102//receptor binding;GO:0005515//protein binding;GO:1901363//heterocyclic compound binding;GO:0003676//nucleic acid binding;GO:0005488//binding;GO:0097159//organic cyclic compound binding	GO:0010468//regulation of gene expression;GO:0050794//regulation of cellular process;GO:0051171//regulation of nitrogen compound metabolic process;GO:0007417//central nervous system development;GO:0032502//developmental process;GO:0031326//regulation of cellular biosynthetic process;GO:0051252//regulation of RNA metabolic process;GO:0048856//anatomical structure development;GO:0044699//single-org…
XM_021277665.2	0.87	0	0.18	0.38	0	0	0	0	119.21	0	21.91	45.84	0	0	0	0	8.4818	0.00155898	0.12125	EIF4G3	PREDICTED: eukaryotic translation initiation factor 4 gamma 3 isoform X1 [Anser cygnoides domesticus]	Human Diseases;Genetic Information Processing	Cardiovascular diseases;Translation	ko03013//RNA transport;ko05416//Viral myocarditis	K03260	-	-	-
XM_021277723.2	0	0	0	0	1.93	0.59	0	1.8	0	0	0	0	147.29	109.48	0	279.81	-10.0768	2.28e-05	0.0591547	JCAD	PREDICTED: junctional protein associated with coronary artery disease [Anas platyrhynchos]	-	-	-	-	-	-	-
XM_021277786.2	0.23	0.31	0.12	0.6	0	0	0	0	12.59	9.17	5.86	29.55	0	0	0	0	8.29921	0.0048014	0.0349656	Cib2	PREDICTED: calcium and integrin-binding family member 2 isoform X3 [Gallus gallus]	-	-	-	-	GO:0030055//cell-substrate junction;GO:0045202//synapse;GO:0070161//anchoring junction;GO:0005576//extracellular region;GO:0005924//cell-substrate adherens junction;GO:0044464//cell part;GO:0016020//membrane;GO:0005623//cell;GO:0030054//cell junction;GO:0005886//plasma membrane;GO:0044421//extracellular region part;GO:0005912//adherens junction;GO:0071944//cell periphery	GO:0005488//binding;GO:0005102//receptor binding;GO:0046872//metal ion binding;GO:0043167//ion binding;GO:0043169//cation binding;GO:0005515//protein binding	GO:0098771//inorganic ion homeostasis;GO:0055080//cation homeostasis;GO:0065008//regulation of biological quality;GO:0042592//homeostatic process;GO:0055065//metal ion homeostasis;GO:0032501//multicellular organismal process;GO:0044707//single-multicellular organism process;GO:0048878//chemical homeostasis;GO:0065007//biological regulation;GO:0044699//single-organism process;GO:0050801//ion homeo…
XM_021277877.2	1.24	0.11	0	0	0	0	0	0	223.98	10.73	0	0	0	0	0	0	8.39874	0.00695708	0.328351	ATP10D	PREDICTED: probable phospholipid-transporting ATPase VD isoform X1 [Anas platyrhynchos]	-	-	-	-	GO:0043231//intracellular membrane-bounded organelle;GO:0043229//intracellular organelle;GO:0044424//intracellular part;GO:0016020//membrane;GO:0005623//cell;GO:0044464//cell part;GO:0005622//intracellular;GO:0031224//intrinsic component of membrane;GO:0043227//membrane-bounded organelle;GO:0044425//membrane part;GO:0043226//organelle	GO:0032549//ribonucleoside binding;GO:0097159//organic cyclic compound binding;GO:0005215//transporter activity;GO:0005319//lipid transporter activity;GO:0005488//binding;GO:1901363//heterocyclic compound binding;GO:0003824//catalytic activity;GO:0032550//purine ribonucleoside binding;GO:0022892//substrate-specific transporter activity;GO:0043167//ion binding;GO:0005548//phospholipid transporter …	GO:0051234//establishment of localization;GO:0006811//ion transport;GO:0006810//transport;GO:0051179//localization;GO:0033036//macromolecule localization;GO:0006820//anion transport;GO:0044765//single-organism transport;GO:0044699//single-organism process;GO:0010876//lipid localization;GO:0071702//organic substance transport;GO:0015748//organophosphate ester transport;GO:0015711//organic anion tr…
XM_021278168.2	0	0	0	0	0	0.09	0.4	0.61	0	0	0	0	0.03	21.88	70.99	131.68	-8.10329	0.00101687	0.1031	FOXN3	PREDICTED: forkhead box protein N3 isoform X1 [Anser cygnoides domesticus]	-	-	-	-	GO:0043226//organelle;GO:0044464//cell part;GO:0043231//intracellular membrane-bounded organelle;GO:0044424//intracellular part;GO:0043227//membrane-bounded organelle;GO:0005623//cell;GO:0005622//intracellular;GO:0043229//intracellular organelle	GO:0003676//nucleic acid binding;GO:0005515//protein binding;GO:1901363//heterocyclic compound binding;GO:0097159//organic cyclic compound binding;GO:0005488//binding;GO:0003677//DNA binding;GO:0001071//nucleic acid binding transcription factor activity	GO:0044699//single-organism process;GO:2001141//regulation of RNA biosynthetic process;GO:0050794//regulation of cellular process;GO:0051716//cellular response to stimulus;GO:0006355//regulation of transcription, DNA-templated;GO:0065007//biological regulation;GO:0031326//regulation of cellular biosynthetic process;GO:0060255//regulation of macromolecule metabolic process;GO:0000077//DNA damage c…
XM_021278440.2	0.11	0.54	0	0.22	0	0	0	0	21.42	57.8	0	38.56	0	0	0	0	7.76487	0.00289154	0.0538854	MYO9B	PREDICTED: unconventional myosin-IXb isoform X1 [Anas platyrhynchos]	-	-	-	-	GO:0015629//actin cytoskeleton;GO:0005737//cytoplasm;GO:0030175//filopodium;GO:0044424//intracellular part;GO:0005623//cell;GO:0031252//cell leading edge;GO:0043234//protein complex;GO:0005856//cytoskeleton;GO:0032991//macromolecular complex;GO:0043228//non-membrane-bounded organelle;GO:0005622//intracellular;GO:0042995//cell projection;GO:0043226//organelle;GO:0043232//intracellular non-membrane…	GO:0032549//ribonucleoside binding;GO:0016787//hydrolase activity;GO:0036094//small molecule binding;GO:0017111//nucleoside-triphosphatase activity;GO:0003824//catalytic activity;GO:0030234//enzyme regulator activity;GO:1901363//heterocyclic compound binding;GO:0032550//purine ribonucleoside binding;GO:0097159//organic cyclic compound binding;GO:0005488//binding;GO:0005515//protein binding;GO:001…	GO:0002376//immune system process;GO:0016477//cell migration;GO:0040011//locomotion;GO:0032990//cell part morphogenesis;GO:0044763//single-organism cellular process;GO:0032502//developmental process;GO:0048856//anatomical structure development;GO:0007163//establishment or maintenance of cell polarity;GO:0048869//cellular developmental process;GO:0030030//cell projection organization;GO:0043087//r…
XM_021279082.2	0	0	0	0	1.54	0	0.74	0	0.13	0	0	0	82.66	0	66.63	0	-9.15482	0.00546972	0.137942	--	PREDICTED: zinc finger protein 92-like [Anas platyrhynchos]	-	-	-	-	-	-	-
XM_027442791.1	63.42	63.18	73.9	90.84	17.04	32.92	48.47	32.99	7675	4156	8181	9802	1073	5025	5102	4234	1.14852	0.00135365	0.0560522	Jph2	PREDICTED: junctophilin-2 [Lepidothrix coronata]	-	-	-	-	GO:0005622//intracellular;GO:0031674//I band;GO:0044422//organelle part;GO:0016528//sarcoplasm;GO:0044449//contractile fiber part;GO:0043292//contractile fiber;GO:0030016//myofibril;GO:0044424//intracellular part;GO:0043232//intracellular non-membrane-bounded organelle;GO:0005737//cytoplasm;GO:0043231//intracellular membrane-bounded organelle;GO:0043226//organelle;GO:0043229//intracellular organe…	GO:0015267//channel activity;GO:0035091//phosphatidylinositol binding;GO:0043167//ion binding;GO:0008324//cation transmembrane transporter activity;GO:0005488//binding;GO:0005215//transporter activity;GO:0072509//divalent inorganic cation transmembrane transporter activity;GO:0022857//transmembrane transporter activity;GO:0005261//cation channel activity;GO:0005262//calcium channel activity;GO:00…	GO:0048634//regulation of muscle organ development;GO:0032412//regulation of ion transmembrane transporter activity;GO:0051049//regulation of transport;GO:2000026//regulation of multicellular organismal development;GO:0051480//regulation of cytosolic calcium ion concentration;GO:0006873//cellular ion homeostasis;GO:0023051//regulation of signaling;GO:0009966//regulation of signal transduction;GO:…
XM_027442839.1	0	0	0	0	0	0	1.25	2.17	0	0	0	0	0	0	67.99	143.35	-9.73978	0.00560596	0.172936	EYA2	PREDICTED: eyes absent homolog 2 isoform X2 [Anas platyrhynchos]	-	-	-	-	GO:0044430//cytoskeletal part;GO:0044464//cell part;GO:0043226//organelle;GO:0043229//intracellular organelle;GO:0043232//intracellular non-membrane-bounded organelle;GO:0005815//microtubule organizing center;GO:0044422//organelle part;GO:0005622//intracellular;GO:0015630//microtubule cytoskeleton;GO:0043228//non-membrane-bounded organelle;GO:0043231//intracellular membrane-bounded organelle;GO:0…	GO:0004721//phosphoprotein phosphatase activity;GO:0016787//hydrolase activity;GO:0016791//phosphatase activity;GO:0003824//catalytic activity;GO:0016788//hydrolase activity, acting on ester bonds;GO:0042578//phosphoric ester hydrolase activity	GO:0046902//regulation of mitochondrial membrane permeability;GO:0006839//mitochondrial transport;GO:0071840//cellular component organization or biogenesis;GO:0050896//response to stimulus;GO:0007005//mitochondrion organization;GO:0038034//signal transduction in absence of ligand;GO:0050794//regulation of cellular process;GO:0016570//histone modification;GO:1902110//positive regulation of mitocho…
XM_027442959.1	0.15	0	0.48	0	0	0	0	0	45.08	0	132.34	0	0	0	0	0	7.29921	0.00757015	0.204887	PTPRT	PREDICTED: receptor-type tyrosine-protein phosphatase T isoform X6 [Calidris pugnax]	-	-	-	-	-	GO:0004721//phosphoprotein phosphatase activity;GO:0016788//hydrolase activity, acting on ester bonds;GO:0005515//protein binding;GO:0050839//cell adhesion molecule binding;GO:0016787//hydrolase activity;GO:0003824//catalytic activity;GO:0005488//binding;GO:0008092//cytoskeletal protein binding;GO:0016791//phosphatase activity;GO:0042578//phosphoric ester hydrolase activity;GO:0042805//actinin bi…	GO:0006464//cellular protein modification process;GO:0016311//dephosphorylation;GO:0071704//organic substance metabolic process;GO:0044260//cellular macromolecule metabolic process;GO:0044267//cellular protein metabolic process;GO:0009987//cellular process;GO:0044238//primary metabolic process;GO:0006796//phosphate-containing compound metabolic process;GO:0043170//macromolecule metabolic process;…
XM_027442962.1	0.23	0	0	0.43	0	0	0	0	68.13	0	0	113.66	0	0	0	0	7.36632	0.00686099	0.15366	PTPRT	PREDICTED: receptor-type tyrosine-protein phosphatase T isoform X8 [Calidris pugnax]	-	-	-	-	-	GO:0042578//phosphoric ester hydrolase activity;GO:0004721//phosphoprotein phosphatase activity;GO:0042805//actinin binding;GO:0016788//hydrolase activity, acting on ester bonds;GO:0050839//cell adhesion molecule binding;GO:0005515//protein binding;GO:0016787//hydrolase activity;GO:0016791//phosphatase activity;GO:0003824//catalytic activity;GO:0005488//binding;GO:0008092//cytoskeletal protein bi…	GO:0044267//cellular protein metabolic process;GO:0006793//phosphorus metabolic process;GO:0044238//primary metabolic process;GO:0016311//dephosphorylation;GO:0043170//macromolecule metabolic process;GO:0006464//cellular protein modification process;GO:0006796//phosphate-containing compound metabolic process;GO:0043412//macromolecule modification;GO:0019538//protein metabolic process;GO:0009987//…
XM_027442970.1	0	0	1.57	2.19	0	0	0	0	0	0	66.11	89.94	0	0	0	0	9.87652	0.00856569	0.141395	SRC	PREDICTED: proto-oncogene tyrosine-protein kinase Src isoform X2 [Haliaeetus leucocephalus]	Organismal Systems;Human Diseases;Environmental Information Processing;Cellular Processes	Drug resistance;Cardiovascular diseases;Infectious diseases;Cell motility;Cellular community - eukaryotes;Immune system;Sensory system;Cancers;Transport and catabolism;Endocrine system;Development;Signal transduction;Nervous system	ko05205//Proteoglycans in cancer;ko04144//Endocytosis;ko04810//Regulation of actin cytoskeleton;ko04015//Rap1 signaling pathway;ko04510//Focal adhesion;ko04360//Axon guidance;ko04921//Oxytocin signaling pathway;ko04530//Tight junction;ko05163//Human cytomegalovirus infection;ko05203//Viral carcinogenesis;ko05152//Tuberculosis;ko05167//Kaposi sarcoma-associated herpesvirus infection;ko04750//Infla…	K05704	GO:0098805//whole membrane;GO:0031982//vesicle;GO:0043231//intracellular membrane-bounded organelle;GO:0098590//plasma membrane region;GO:0005737//cytoplasm;GO:0044464//cell part;GO:0031090//organelle membrane;GO:0005773//vacuole;GO:0031253//cell projection membrane;GO:0044446//intracellular organelle part;GO:0005856//cytoskeleton;GO:0019866//organelle inner membrane;GO:0044444//cytoplasmic part;…	GO:1901363//heterocyclic compound binding;GO:0097159//organic cyclic compound binding;GO:0046906//tetrapyrrole binding;GO:0032549//ribonucleoside binding;GO:0019904//protein domain specific binding;GO:0004713//protein tyrosine kinase activity;GO:0016772//transferase activity, transferring phosphorus-containing groups;GO:0005102//receptor binding;GO:0036094//small molecule binding;GO:0003824//cata…	GO:0007276//gamete generation;GO:0045022//early endosome to late endosome transport;GO:0071407//cellular response to organic cyclic compound;GO:0043066//negative regulation of apoptotic process;GO:0061572//actin filament bundle organization;GO:0032268//regulation of cellular protein metabolic process;GO:0044085//cellular component biogenesis;GO:0043254//regulation of protein complex assembly;GO:0…
XM_027442979.1	0	0	0	0	0	1.08	0.54	0.49	0	0	0	0	0	92.35	31.62	35.33	-9.04303	0.00287535	0.083636	MANBAL	PREDICTED: protein MANBAL [Anser cygnoides domesticus]	-	-	-	-	-	-	-
XM_027443085.1	0	1.2	0.82	2	0	0	0	0	0	38.58	44.41	106	0	0	0	0	9.97298	0.000965074	0.0745726	FBXO2	PREDICTED: F-box only protein 2 isoform X1 [Anas platyrhynchos]	Genetic Information Processing	Folding, sorting and degradation	ko04120//Ubiquitin mediated proteolysis;ko04141//Protein processing in endoplasmic reticulum	K10099	GO:0005622//intracellular;GO:0044444//cytoplasmic part;GO:0031988//membrane-bounded vesicle;GO:0043226//organelle;GO:0031982//vesicle;GO:0032991//macromolecular complex;GO:0044464//cell part;GO:0044424//intracellular part;GO:0005737//cytoplasm;GO:0044309//neuron spine;GO:0042995//cell projection;GO:0043227//membrane-bounded organelle;GO:0043234//protein complex;GO:0043005//neuron projection;GO:00…	GO:0005488//binding;GO:0005515//protein binding	GO:0044237//cellular metabolic process;GO:0019538//protein metabolic process;GO:0065007//biological regulation;GO:0032268//regulation of cellular protein metabolic process;GO:0044248//cellular catabolic process;GO:0043170//macromolecule metabolic process;GO:0008152//metabolic process;GO:0051246//regulation of protein metabolic process;GO:0006508//proteolysis;GO:1903320//regulation of protein modi…
XM_027443108.1	0	0	0	0	2.31	0	0.8	0	0	0	0	0	160.65	0	92.89	0	-9.6027	0.00169404	0.156319	EIF4G3	PREDICTED: eukaryotic translation initiation factor 4 gamma 3 isoform X1 [Anser cygnoides domesticus]	Human Diseases;Genetic Information Processing	Cardiovascular diseases;Translation	ko03013//RNA transport;ko05416//Viral myocarditis	K03260	-	-	-
XM_027443326.1	0	0	0	0	0.46	0	0.19	0.29	0	0	0	0	51.79	0	35.07	65.99	-7.87652	0.0015995	0.0361725	PRDM2	PR domain zinc finger protein 2, partial [Anas platyrhynchos]	Metabolism	Amino acid metabolism	ko00310//Lysine degradation	K11432	-	-	-
XM_027443561.1	2.98	2.55	2.14	1.2	0.13	0	0.22	0	145.44	67.83	95.43	52.36	3.28	0	9.27	0	4.66351	0.0022104	0.00544299	PPP3CC	PREDICTED: serine/threonine-protein phosphatase 2B catalytic subunit gamma isoform isoform X2 [Alligator mississippiensis]	Human Diseases;Organismal Systems;Cellular Processes;Environmental Information Processing	Nervous system;Signal transduction;Development;Endocrine system;Immune system;Neurodegenerative diseases;Cell growth and death;Substance dependence;Infectious diseases	ko04010//MAPK signaling pathway;ko04020//Calcium signaling pathway;ko04022//cGMP - PKG signaling pathway;ko05166//HTLV-I infection;ko04360//Axon guidance;ko04921//Oxytocin signaling pathway;ko04310//Wnt signaling pathway;ko05163//Human cytomegalovirus infection;ko05152//Tuberculosis;ko04728//Dopaminergic synapse;ko05167//Kaposi sarcoma-associated herpesvirus infection;ko04724//Glutamatergic synap…	K04348	-	-	-
XM_027443764.1	1.02	0.66	0	0.54	0	0	0	0	107.24	37.91	0	50.55	0	0	0	0	9.11634	0.000978905	0.0698083	Kiaa1522	PREDICTED: uncharacterized protein KIAA1522 homolog isoform X3 [Gallus gallus]	-	-	-	-	-	-	-
XM_027443992.1	0.05	5.42	0.02	10.88	0.22	0	0.15	0	10.01	605.11	3.96	1992.81	23.99	0	26.78	0.31	5.46739	0.00160368	0.220685	Epb41	PREDICTED: protein 4.1 isoform X8 [Anser cygnoides domesticus]	-	-	-	-	-	-	-
XM_027444200.1	0	1.05	31.6	0	0	0	0.02	0	0	53.01	2691.94	0	0	0	1.52	0	10.6729	5.03e-05	0.344603	Aplp2	PREDICTED: amyloid-like protein 2 isoform X1 [Haliaeetus leucocephalus]	-	-	-	-	-	-	-
XM_027444316.1	1.23	0	0.37	0.54	4.4	10.86	4.28	13.38	108.81	0	30.15	42.5	202.94	1214.89	330.17	1258.18	-3.94328	6.15e-05	0.0464239	ZBTB16	PREDICTED: zinc finger and BTB domain-containing protein 16 isoform X1 [Anas platyrhynchos]	Human Diseases	Cancers	ko05200//Pathways in cancer;ko05202//Transcriptional misregulation in cancers;ko05221//Acute myeloid leukemia	K10055	GO:0043226//organelle;GO:0043231//intracellular membrane-bounded organelle;GO:0044451//nucleoplasm part;GO:0043227//membrane-bounded organelle;GO:0016604//nuclear body;GO:0043229//intracellular organelle;GO:0031981//nuclear lumen;GO:0005622//intracellular;GO:0043233//organelle lumen;GO:0032991//macromolecular complex;GO:0044422//organelle part;GO:0005634//nucleus;GO:0044428//nuclear part;GO:00700…	GO:0003676//nucleic acid binding;GO:0046983//protein dimerization activity;GO:0043167//ion binding;GO:0097159//organic cyclic compound binding;GO:1901363//heterocyclic compound binding;GO:0043169//cation binding;GO:0005488//binding;GO:0005515//protein binding	GO:0009790//embryo development;GO:0098728//germline stem cell asymmetric division;GO:0048869//cellular developmental process;GO:0045580//regulation of T cell differentiation;GO:0048609//multicellular organismal reproductive process;GO:0045582//positive regulation of T cell differentiation;GO:0051252//regulation of RNA metabolic process;GO:0034112//positive regulation of homotypic cell-cell adhesi…
XM_027444318.1	0	1.91	0.2	1.25	8.43	12.9	9.54	7.93	0	53.99	9.45	58.17	228.44	847.11	431.83	438.09	-3.52952	0.000926869	0.0129601	ZBTB16	PREDICTED: zinc finger and BTB domain-containing protein 16 isoform X2 [Anas platyrhynchos]	Human Diseases	Cancers	ko05200//Pathways in cancer;ko05202//Transcriptional misregulation in cancers;ko05221//Acute myeloid leukemia	K10055	GO:0005622//intracellular;GO:0044422//organelle part;GO:0031974//membrane-enclosed lumen;GO:0044451//nucleoplasm part;GO:0005654//nucleoplasm;GO:0043234//protein complex;GO:0043233//organelle lumen;GO:0016604//nuclear body;GO:0044424//intracellular part;GO:0031981//nuclear lumen;GO:0044464//cell part;GO:0043227//membrane-bounded organelle;GO:0005634//nucleus;GO:0044428//nuclear part;GO:0044446//i…	GO:0097159//organic cyclic compound binding;GO:0046983//protein dimerization activity;GO:1901363//heterocyclic compound binding;GO:0005488//binding;GO:0005515//protein binding;GO:0003676//nucleic acid binding;GO:0043167//ion binding;GO:0043169//cation binding	GO:0031323//regulation of cellular metabolic process;GO:0044702//single organism reproductive process;GO:0032504//multicellular organism reproduction;GO:0022409//positive regulation of cell-cell adhesion;GO:0050793//regulation of developmental process;GO:0031326//regulation of cellular biosynthetic process;GO:1902105//regulation of leukocyte differentiation;GO:0051301//cell division;GO:0051240//p…
XM_027444321.1	2681.01	1232.64	1591.8	3685.41	7259.17	7728.65	9356.17	9858.31	77173	19286	41914	94586	108708	280637	234241	300982	-1.89582	4.24e-07	0.00974136	APOA1	apolipoprotein AI precursor [Anas sp.]	Organismal Systems;Human Diseases	Digestive system;Endocrine system;Infectious diseases	ko03320//PPAR signaling pathway;ko04979//Cholesterol metabolism;ko04975//Fat digestion and absorption;ko05143//African trypanosomiasis;ko04977//Vitamin digestion and absorption	K08757	GO:0043226//organelle;GO:0032991//macromolecular complex;GO:0005737//cytoplasm;GO:0031988//membrane-bounded vesicle;GO:1990777//lipoprotein particle;GO:0005623//cell;GO:0031410//cytoplasmic vesicle;GO:0005576//extracellular region;GO:0043231//intracellular membrane-bounded organelle;GO:0034385//triglyceride-rich lipoprotein particle;GO:0016023//cytoplasmic, membrane-bounded vesicle;GO:0034364//hi…	GO:0005515//protein binding;GO:0005102//receptor binding;GO:0008289//lipid binding;GO:0071814//protein-lipid complex binding;GO:0036094//small molecule binding;GO:0008047//enzyme activator activity;GO:0005215//transporter activity;GO:0022892//substrate-specific transporter activity;GO:0071813//lipoprotein particle binding;GO:0044877//macromolecular complex binding;GO:0032934//sterol binding;GO:00…	GO:0032488//Cdc42 protein signal transduction;GO:0048870//cell motility;GO:0001817//regulation of cytokine production;GO:0071825//protein-lipid complex subunit organization;GO:0015711//organic anion transport;GO:0051493//regulation of cytoskeleton organization;GO:0002683//negative regulation of immune system process;GO:0048522//positive regulation of cellular process;GO:0006928//movement of cell …
XM_027444398.1	0.01	0.01	0	0	4.77	4.16	4.77	2.5	0.5	0.49	0.37	0.1	236.99	501.72	396	253.64	-9.66178	5.59e-14	0.00147193	St14	PREDICTED: suppressor of tumorigenicity 14 protein isoform X1 [Anas platyrhynchos]	Human Diseases	Cancers	ko05206//MicroRNAs in cancer	K08670	GO:0019898//extrinsic component of membrane;GO:0043226//organelle;GO:0016020//membrane;GO:0043227//membrane-bounded organelle;GO:0044425//membrane part;GO:0031982//vesicle;GO:0031988//membrane-bounded vesicle	GO:0008233//peptidase activity;GO:0016787//hydrolase activity;GO:0070011//peptidase activity, acting on L-amino acid peptides;GO:0004175//endopeptidase activity;GO:0003824//catalytic activity	GO:0044238//primary metabolic process;GO:0044767//single-organism developmental process;GO:0009987//cellular process;GO:0009913//epidermal cell differentiation;GO:0030154//cell differentiation;GO:0009888//tissue development;GO:0043170//macromolecule metabolic process;GO:0008544//epidermis development;GO:0048869//cellular developmental process;GO:0044699//single-organism process;GO:0019538//protei…
XM_027444562.1	0.7	1.59	0.17	0	0	0	0	0	91.54	113.15	20.22	0	0	0	0	0	9.26444	0.000527769	0.0851253	ARNT	PREDICTED: aryl hydrocarbon receptor nuclear translocator isoform X10 [Anas platyrhynchos]	Human Diseases;Environmental Information Processing	Endocrine and metabolic diseases;Cancers;Signal transduction	ko05200//Pathways in cancer;ko04934//Cushing syndrome;ko04066//HIF-1 signaling pathway;ko05211//Renal cell carcinoma;ko05204//Chemical carcinogenesis	K09097	GO:0043229//intracellular organelle;GO:0043234//protein complex;GO:0044424//intracellular part;GO:0043226//organelle;GO:0043227//membrane-bounded organelle;GO:0005623//cell;GO:0043231//intracellular membrane-bounded organelle;GO:0044464//cell part;GO:0005622//intracellular;GO:0032991//macromolecular complex	GO:1901363//heterocyclic compound binding;GO:0003676//nucleic acid binding;GO:0046983//protein dimerization activity;GO:0003677//DNA binding;GO:0004872//receptor activity;GO:0005488//binding;GO:0060089//molecular transducer activity;GO:0005515//protein binding;GO:0001067//regulatory region nucleic acid binding;GO:0097159//organic cyclic compound binding;GO:0000975//regulatory region DNA binding;G…	GO:0009889//regulation of biosynthetic process;GO:0051716//cellular response to stimulus;GO:0048518//positive regulation of biological process;GO:0065007//biological regulation;GO:0033233//regulation of protein sumoylation;GO:1903320//regulation of protein modification by small protein conjugation or removal;GO:0044700//single organism signaling;GO:0044699//single-organism process;GO:0010468//reg…
XM_027444695.1	1.2	0.99	1.23	1.81	2.65	5.39	3.98	12.22	77.52	34.62	72.8	104.21	88.94	438.31	223.42	836.12	-2.21251	0.0035198	0.0949806	FKBP5	PREDICTED: peptidyl-prolyl cis-trans isomerase FKBP5 isoform X1 [Anas platyrhynchos]	Organismal Systems	Endocrine system	ko04915//Estrogen signaling pathway	K09571	GO:0031988//membrane-bounded vesicle;GO:0043229//intracellular organelle;GO:0044464//cell part;GO:0043227//membrane-bounded organelle;GO:0043226//organelle;GO:0005622//intracellular;GO:0044424//intracellular part;GO:0005623//cell;GO:0043231//intracellular membrane-bounded organelle;GO:0031982//vesicle	GO:0005515//protein binding;GO:0016859//cis-trans isomerase activity;GO:0005488//binding;GO:0016853//isomerase activity;GO:0003824//catalytic activity	GO:0009987//cellular process;GO:0006457//protein folding
XM_027444696.1	0.14	0.13	0.41	0.37	1.36	1.18	1.25	4.73	8.48	4.38	23.2	20.79	44.06	92.69	67.58	312.88	-3.02046	0.00752537	0.113565	FKBP5	PREDICTED: peptidyl-prolyl cis-trans isomerase FKBP5 isoform X2 [Anas platyrhynchos]	Organismal Systems	Endocrine system	ko04915//Estrogen signaling pathway	K09571	GO:0043229//intracellular organelle;GO:0005622//intracellular;GO:0044464//cell part;GO:0043226//organelle;GO:0043227//membrane-bounded organelle;GO:0031988//membrane-bounded vesicle;GO:0031982//vesicle;GO:0044424//intracellular part;GO:0005623//cell;GO:0043231//intracellular membrane-bounded organelle	GO:0016853//isomerase activity;GO:0005488//binding;GO:0016859//cis-trans isomerase activity;GO:0005515//protein binding;GO:0003824//catalytic activity	GO:0009987//cellular process;GO:0006457//protein folding
XM_027445167.1	112.85	132.53	100.76	144.99	69.15	59.6	49.01	37.82	8821.71	5631.18	7204.89	10105.3	2811.98	5877.33	3332.26	3135.69	1.18788	0.000210057	0.013488	PRELP	PREDICTED: prolargin [Anser cygnoides domesticus]	-	-	-	-	GO:0031988//membrane-bounded vesicle;GO:0043227//membrane-bounded organelle;GO:0031012//extracellular matrix;GO:0031982//vesicle;GO:0043226//organelle	-	GO:0044767//single-organism developmental process;GO:0032502//developmental process;GO:0044699//single-organism process;GO:0007568//aging
XM_027445201.1	0	7.45	0	0	0	0	0	0	0	326.43	0	0	0	0	0	0	10.863	0.00446561	0.355918	CNP	PREDICTED: 2',3'-cyclic-nucleotide 3'-phosphodiesterase [Anas platyrhynchos]	-	-	-	-	-	-	-
XM_027445319.1	0	0	3.28	0	0	0	0	0	0	0.14	325.87	0	0	0	0	0	9.67948	0.00732626	0.355662	GJC1	PREDICTED: gap junction gamma-1 protein [Anas platyrhynchos]	-	-	-	-	GO:0043234//protein complex;GO:0005911//cell-cell junction;GO:0044425//membrane part;GO:0031224//intrinsic component of membrane;GO:0016020//membrane;GO:0032991//macromolecular complex;GO:0030054//cell junction	GO:0005215//transporter activity;GO:0015075//ion transmembrane transporter activity;GO:0022857//transmembrane transporter activity;GO:0022891//substrate-specific transmembrane transporter activity;GO:0022892//substrate-specific transporter activity	GO:0044763//single-organism cellular process;GO:0044765//single-organism transport;GO:0048856//anatomical structure development;GO:0051234//establishment of localization;GO:0009888//tissue development;GO:0006810//transport;GO:0050877//neurological system process;GO:0044700//single organism signaling;GO:0050953//sensory perception of light stimulus;GO:0048869//cellular developmental process;GO:000…
XM_027445373.1	2.5	0.06	2.24	0.04	0.04	0.02	0.02	0.01	99.33	1.25	81.45	1.34	0.74	1.22	0.8	0.3	5.74894	0.00534326	0.133388	FHL2	PREDICTED: four and a half LIM domains protein 2 [Anas platyrhynchos]	-	-	-	-	GO:0043227//membrane-bounded organelle;GO:0043228//non-membrane-bounded organelle;GO:0044424//intracellular part;GO:0044464//cell part;GO:0043231//intracellular membrane-bounded organelle;GO:0030054//cell junction;GO:0005912//adherens junction;GO:0043226//organelle;GO:0005622//intracellular;GO:0070161//anchoring junction;GO:0043229//intracellular organelle;GO:0005924//cell-substrate adherens junc…	GO:0046914//transition metal ion binding;GO:0043167//ion binding;GO:0046872//metal ion binding;GO:0005488//binding;GO:0043169//cation binding;GO:0005515//protein binding	GO:0006355//regulation of transcription, DNA-templated;GO:0060343//trabecula formation;GO:0007507//heart development;GO:0031326//regulation of cellular biosynthetic process;GO:0048869//cellular developmental process;GO:0060255//regulation of macromolecule metabolic process;GO:2000112//regulation of cellular macromolecule biosynthetic process;GO:0009987//cellular process;GO:2001141//regulation of …
XM_027445536.1	0	6.53	0	0	0	0	0	0	0	288.52	0	0	0	0	0	0	10.6729	0.00565046	0.355918	GPR182	PREDICTED: G-protein coupled receptor 182 [Anas platyrhynchos]	-	-	-	-	GO:0031224//intrinsic component of membrane;GO:0044425//membrane part;GO:0016020//membrane	GO:0004888//transmembrane signaling receptor activity;GO:0060089//molecular transducer activity;GO:0038023//signaling receptor activity;GO:0004872//receptor activity;GO:0099600//transmembrane receptor activity;GO:0004871//signal transducer activity	GO:0023052//signaling;GO:0065007//biological regulation;GO:0050896//response to stimulus;GO:0044763//single-organism cellular process;GO:0051716//cellular response to stimulus;GO:0007165//signal transduction;GO:0050794//regulation of cellular process;GO:0044699//single-organism process;GO:0050789//regulation of biological process;GO:0007154//cell communication;GO:0009987//cellular process;GO:0044…
XM_027446178.1	0	0.1	0.57	0	0	0	0	0	0	16.9	165.08	0	0	0	0	0	7.38802	0.00840727	0.299415	AFF3	PREDICTED: AF4/FMR2 family member 3 [Falco peregrinus]	-	-	-	-	-	-	-
XM_027446179.1	3.94	2.95	3.24	6.59	26.81	16.09	17.66	8.34	94.92	38.53	71.3	141.38	335.62	488.47	369.57	212.91	-2.04293	0.00396727	0.00471833	ACER2	PREDICTED: alkaline ceramidase 2 isoform X1 [Haliaeetus leucocephalus]	Environmental Information Processing;Metabolism	Lipid metabolism;Global and overview maps;Signal transduction	ko01100//Metabolic pathways;ko04071//Sphingolipid signaling pathway;ko00600//Sphingolipid metabolism	K01441	GO:0031300//intrinsic component of organelle membrane;GO:0044464//cell part;GO:0031090//organelle membrane;GO:0031224//intrinsic component of membrane;GO:0000139//Golgi membrane;GO:0005737//cytoplasm;GO:0016020//membrane;GO:0005622//intracellular;GO:0044424//intracellular part;GO:0031228//intrinsic component of Golgi membrane;GO:0044422//organelle part;GO:0098588//bounding membrane of organelle;G…	GO:0016787//hydrolase activity;GO:0003824//catalytic activity;GO:0004553//hydrolase activity, hydrolyzing O-glycosyl compounds;GO:0016798//hydrolase activity, acting on glycosyl bonds;GO:0016810//hydrolase activity, acting on carbon-nitrogen (but not peptide) bonds;GO:0016811//hydrolase activity, acting on carbon-nitrogen (but not peptide) bonds, in linear amides	GO:0008219//cell death;GO:0051336//regulation of hydrolase activity;GO:0032268//regulation of cellular protein metabolic process;GO:0010952//positive regulation of peptidase activity;GO:0031324//negative regulation of cellular metabolic process;GO:1903018//regulation of glycoprotein metabolic process;GO:0045862//positive regulation of proteolysis;GO:0052548//regulation of endopeptidase activity;G…
XM_027446192.1	0.23	0.3	0.12	0.14	0	0	0	0	71.81	51.21	34.98	38.14	0	0	0	0	7.62571	4.95e-05	0.00108946	AFF3	PREDICTED: AF4/FMR2 family member 3 [Falco peregrinus]	-	-	-	-	-	-	-
XM_027446330.1	0	0	0.01	0	0.34	1.53	3.98	0.93	0	0	0.8	0	21.56	237.41	426.49	121.67	-9.40514	6.69e-08	0.0595168	RNF38	PREDICTED: E3 ubiquitin-protein ligase RNF38 [Manacus vitellinus]	-	-	-	-	-	-	-
XM_027446371.1	37.5	25.55	23.42	32.8	11.34	18.46	9.17	12.03	2705.42	1002.11	1545.44	2109.63	425.7	1679.81	575.59	920.41	1.22566	0.00153034	0.0874373	SGTB	PREDICTED: small glutamine-rich tetratricopeptide repeat-containing protein beta [Anser cygnoides domesticus]	-	-	-	-	-	-	-
XM_027446387.1	0	0	0	0	0	0.95	1	0	0	0	0	0	0	151.84	110.21	0.01	-8.92926	0.00403617	0.141976	CEP120	PREDICTED: LOW QUALITY PROTEIN: centrosomal protein of 120 kDa [Anas platyrhynchos]	-	-	-	-	-	-	-
XM_027446437.1	4.34	4.96	0	0	0	0	0	0	265.36	165	0	0	0	0	0	0	11.183	0.000691675	0.151092	UTP15	U3 small nucleolar RNA-associated protein 15 homolog [Gallus gallus]	Genetic Information Processing	Translation	ko03008//Ribosome biogenesis in eukaryotes	K14549	GO:0043226//organelle;GO:0005623//cell;GO:0043229//intracellular organelle;GO:0005622//intracellular;GO:0043227//membrane-bounded organelle;GO:0044464//cell part;GO:0043232//intracellular non-membrane-bounded organelle;GO:0043231//intracellular membrane-bounded organelle;GO:0043228//non-membrane-bounded organelle;GO:0044424//intracellular part	GO:0003676//nucleic acid binding;GO:0003723//RNA binding;GO:0005488//binding;GO:0097159//organic cyclic compound binding;GO:1901363//heterocyclic compound binding	GO:0006807//nitrogen compound metabolic process;GO:0016072//rRNA metabolic process;GO:0046483//heterocycle metabolic process;GO:0009987//cellular process;GO:0044260//cellular macromolecule metabolic process;GO:0044237//cellular metabolic process;GO:0071704//organic substance metabolic process;GO:0044238//primary metabolic process;GO:0016070//RNA metabolic process;GO:0034660//ncRNA metabolic proce…
XM_027446511.1	0	0	0	0	0.31	0.16	0.45	0	0	0	0	0	23.44	28.64	57.46	0	-7.84549	0.00462131	0.0594266	ARHGEF28	PREDICTED: LOW QUALITY PROTEIN: rho guanine nucleotide exchange factor 28 [Anas platyrhynchos]	-	-	-	-	-	-	-
XM_027446596.1	0	0	0	0	0	0	0	13.4	0	0	0	0	0	0	0	544.25	-11.7099	0.00447643	0.355918	Rfk	PREDICTED: riboflavin kinase-like [Coturnix japonica]	Metabolism	Metabolism of cofactors and vitamins;Global and overview maps	ko01100//Metabolic pathways;ko00740//Riboflavin metabolism	K00861	-	GO:0016301//kinase activity;GO:0003824//catalytic activity;GO:0016772//transferase activity, transferring phosphorus-containing groups;GO:0016740//transferase activity	GO:0006766//vitamin metabolic process;GO:0051341//regulation of oxidoreductase activity;GO:0019222//regulation of metabolic process;GO:0044763//single-organism cellular process;GO:0006793//phosphorus metabolic process;GO:0006767//water-soluble vitamin metabolic process;GO:0012501//programmed cell death;GO:0042726//flavin-containing compound metabolic process;GO:0033860//regulation of NAD(P)H oxid…
XM_027446620.1	2.21	1.64	0.54	2.01	4.74	5.63	5.33	5.89	685.21	277.36	152.93	558.11	765.7	2206.54	1441	1941.74	-1.75422	0.000174341	0.0137511	PDZD2	PREDICTED: PDZ domain-containing protein 2 isoform X1 [Anser cygnoides domesticus]	-	-	-	-	-	-	-
XM_027446818.1	10.25	12.4	16.95	9.43	6.68	7.13	4.44	5.24	1121	737	1695	919	380	983	422	607	1.06162	0.00933555	0.0818627	TRIM36	PREDICTED: E3 ubiquitin-protein ligase TRIM36 isoform X1 [Anas platyrhynchos]	-	-	-	-	GO:0044464//cell part;GO:0005623//cell;GO:0031988//membrane-bounded vesicle;GO:0043227//membrane-bounded organelle;GO:0031982//vesicle;GO:0043226//organelle	GO:0005488//binding;GO:0046872//metal ion binding;GO:0046914//transition metal ion binding;GO:0043169//cation binding;GO:0043167//ion binding;GO:0003824//catalytic activity;GO:0019787//ubiquitin-like protein transferase activity;GO:0016740//transferase activity	GO:0007338//single fertilization;GO:0007049//cell cycle;GO:0070647//protein modification by small protein conjugation or removal;GO:0006464//cellular protein modification process;GO:0044763//single-organism cellular process;GO:0044702//single organism reproductive process;GO:0009987//cellular process;GO:0051704//multi-organism process;GO:0044237//cellular metabolic process;GO:0044260//cellular ma…
XM_027446852.1	50.64	44.76	41.26	51.86	112.69	140.64	127.1	83.03	793	381	591	724	918	2778	1731	1379	-1.29773	0.000554097	0.0375529	Rps23	40S ribosomal protein S23 [Homo sapiens]	Genetic Information Processing	Translation	ko03010//Ribosome	K02973	GO:0044444//cytoplasmic part;GO:0044391//ribosomal subunit;GO:0032991//macromolecular complex;GO:0043228//non-membrane-bounded organelle;GO:1990904//ribonucleoprotein complex;GO:0043229//intracellular organelle;GO:0044424//intracellular part;GO:0005622//intracellular;GO:0030529//intracellular ribonucleoprotein complex;GO:0044464//cell part;GO:0005623//cell;GO:0043226//organelle;GO:0043232//intrac…	GO:0005488//binding;GO:0097159//organic cyclic compound binding;GO:1901363//heterocyclic compound binding;GO:0003723//RNA binding;GO:0003676//nucleic acid binding	GO:0044270//cellular nitrogen compound catabolic process;GO:0044802//single-organism membrane organization;GO:0006139//nucleobase-containing compound metabolic process;GO:0006613//cotranslational protein targeting to membrane;GO:0000956//nuclear-transcribed mRNA catabolic process;GO:0044699//single-organism process;GO:0006412//translation;GO:0034613//cellular protein localization;GO:0051234//esta…
XM_027447001.1	0.01	0	0	0	0.02	0.01	5.03	0	1.42	0	0	0	1.41	1.28	514	0	-8.98299	0.00205719	0.35404	Stag2	PREDICTED: LOW QUALITY PROTEIN: cohesin subunit SA-2-like [Anser cygnoides domesticus]	Cellular Processes	Cell growth and death	ko04110//Cell cycle	K06671	-	-	-
XM_027447176.1	0	0	0	0	0	0.22	0.31	0.49	0	0	0	0	0	26.65	26.7	50.79	-7.99435	0.00631398	0.0459264	Ubap1	PREDICTED: ubiquitin-associated protein 1 isoform X1 [Anas platyrhynchos]	-	-	-	-	-	-	-
XM_027447303.1	0	0	0	0	0.36	0.17	0.09	0.54	0	0	0.1	0	17.06	19.55	7.22	52	-8.17991	0.00167008	0.0489588	GYG2	PREDICTED: glycogenin-2 isoform X2 [Anas platyrhynchos]	Metabolism	Global and overview maps;Carbohydrate metabolism	ko01100//Metabolic pathways;ko00500//Starch and sucrose metabolism	K00750	-	-	-
XM_027447364.1	25.01	44.52	55.2	21.74	17.9	20.25	17.54	12.81	6101.79	5903.39	12319.1	4729.59	2271.62	6231.63	3721.59	3314.83	1.09643	0.00274169	0.126836	MXRA5	PREDICTED: matrix-remodeling-associated protein 5 isoform X2 [Anas platyrhynchos]	-	-	-	-	-	-	-
XM_027447579.1	0	8.92	0	4.11	0	0	0.01	0	0	429.18	0	324.08	0	0	0.58	0	10.3476	0.000196125	0.140432	MKRN1	Makorin-1, partial [Anas platyrhynchos]	-	-	-	-	-	GO:0043167//ion binding;GO:0005488//binding;GO:0043169//cation binding	-
XM_027448100.1	1.21	0.51	0.66	0.53	0	0	0	0.1	100.55	23.15	50.53	39.07	0	0	0	8.9	4.86295	0.00929255	0.0230734	SMAD7	PREDICTED: mothers against decapentaplegic homolog 7 isoform X2 [Alligator mississippiensis]	Environmental Information Processing	Signal transduction	ko04390//Hippo signaling pathway;ko04350//TGF-beta signaling pathway	K19631	GO:0043226//organelle;GO:0044424//intracellular part;GO:0043231//intracellular membrane-bounded organelle;GO:0032991//macromolecular complex;GO:0044464//cell part;GO:0016020//membrane;GO:0030054//cell junction;GO:0005622//intracellular;GO:0005623//cell;GO:0005911//cell-cell junction;GO:0043234//protein complex;GO:0043227//membrane-bounded organelle;GO:0043229//intracellular organelle	GO:0005102//receptor binding;GO:0032403//protein complex binding;GO:0005515//protein binding;GO:0001071//nucleic acid binding transcription factor activity;GO:0005057//receptor signaling protein activity;GO:0044389//ubiquitin-like protein ligase binding;GO:1901363//heterocyclic compound binding;GO:0044877//macromolecular complex binding;GO:0003677//DNA binding;GO:0005160//transforming growth fact…	GO:0051253//negative regulation of RNA metabolic process;GO:0048644//muscle organ morphogenesis;GO:0051171//regulation of nitrogen compound metabolic process;GO:0071840//cellular component organization or biogenesis;GO:0031327//negative regulation of cellular biosynthetic process;GO:0048522//positive regulation of cellular process;GO:0044057//regulation of system process;GO:0051239//regulation of…
XM_027448570.1	2.54	3.61	3.19	2.89	3.75	101.46	1.07	1.49	108	83.4	124.18	109.69	83	5439.75	39.46	66.98	-3.13946	0.00396962	0.370501	pol	PREDICTED: endogenous retrovirus group K member 19 Pol protein-like [Cuculus canorus]	-	-	-	-	-	-	-
XM_027448577.1	0.55	0.16	0.08	0.28	0	0	0	0	72.21	11.35	10.07	32.14	0	0	0	0	8.0634	0.000769626	0.0732171	UMODL1	PREDICTED: uromodulin-like 1 isoform X3 [Anas platyrhynchos]	-	-	-	-	-	-	-
XM_027448982.1	0	0	0	0	8.78	0	0	0	0	0	0	0	398.18	0	0	0	-11.1	0.00284091	0.355918	ATAD2	PREDICTED: ATPase family AAA domain-containing protein 2 isoform X2 [Anser cygnoides domesticus]	-	-	-	-	GO:0043227//membrane-bounded organelle;GO:0043226//organelle	GO:0036094//small molecule binding;GO:0097159//organic cyclic compound binding;GO:1901363//heterocyclic compound binding;GO:0005488//binding	GO:0060255//regulation of macromolecule metabolic process;GO:0009889//regulation of biosynthetic process;GO:0051171//regulation of nitrogen compound metabolic process;GO:0031323//regulation of cellular metabolic process;GO:0080090//regulation of primary metabolic process;GO:0065007//biological regulation;GO:1903506//regulation of nucleic acid-templated transcription;GO:2000112//regulation of cell…
XM_027449069.1	0.01	0	0.57	0.78	0	0	0.01	0	0.73	0.33	65.87	88.02	0.06	0.15	0.71	0.34	7.08746	0.00518411	0.138831	CNKSR2	PREDICTED: connector enhancer of kinase suppressor of ras 2 isoform X5 [Coturnix japonica]	-	-	-	-	GO:0043231//intracellular membrane-bounded organelle;GO:0005623//cell;GO:0031982//vesicle;GO:0044464//cell part;GO:0031988//membrane-bounded vesicle;GO:0005622//intracellular;GO:0044424//intracellular part;GO:0043227//membrane-bounded organelle;GO:0043226//organelle;GO:0043229//intracellular organelle;GO:0016020//membrane	-	GO:0065007//biological regulation;GO:0050794//regulation of cellular process;GO:0010646//regulation of cell communication;GO:0050789//regulation of biological process
XM_027449090.1	0	0	0	0	0	0	0	1.87	0	0	0	0	0.01	0	0	466.82	-8.86882	0.005753	0.355905	BRWD1	PREDICTED: bromodomain and WD repeat-containing protein 1 isoform X1 [Anser cygnoides domesticus]	-	-	-	-	-	-	GO:0010468//regulation of gene expression;GO:0019222//regulation of metabolic process;GO:0022603//regulation of anatomical structure morphogenesis;GO:0019219//regulation of nucleobase-containing compound metabolic process;GO:0051171//regulation of nitrogen compound metabolic process;GO:0051252//regulation of RNA metabolic process;GO:0010556//regulation of macromolecule biosynthetic process;GO:006…
XM_027449251.1	21.02	16.36	9.48	13.64	4.23	4.08	0.64	6.59	981.34	415.02	404.76	567.59	102.63	240.38	26.1	326.28	1.96095	0.00342188	0.0323	CCT8	PREDICTED: T-complex protein 1 subunit theta isoform X2 [Falco peregrinus]	-	-	-	-	GO:0031988//membrane-bounded vesicle;GO:0043227//membrane-bounded organelle;GO:0043226//organelle;GO:0005737//cytoplasm;GO:0044422//organelle part;GO:0043232//intracellular non-membrane-bounded organelle;GO:0044430//cytoskeletal part;GO:0005856//cytoskeleton;GO:0032991//macromolecular complex;GO:0005815//microtubule organizing center;GO:0015630//microtubule cytoskeleton;GO:0044464//cell part;GO:0…	GO:0097159//organic cyclic compound binding;GO:0032549//ribonucleoside binding;GO:0005515//protein binding;GO:0001883//purine nucleoside binding;GO:0032550//purine ribonucleoside binding;GO:1901363//heterocyclic compound binding;GO:0097367//carbohydrate derivative binding;GO:0036094//small molecule binding;GO:0001882//nucleoside binding;GO:0005488//binding	GO:0051704//multi-organism process;GO:0065003//macromolecular complex assembly;GO:0044238//primary metabolic process;GO:0070271//protein complex biogenesis;GO:0009987//cellular process;GO:0044085//cellular component biogenesis;GO:0000003//reproduction;GO:0051234//establishment of localization;GO:0008152//metabolic process;GO:0019538//protein metabolic process;GO:0044703//multi-organism reproducti…
XM_027449331.1	1.52	2.98	0	0	0	0	0	0	263.26	280.6	0	0	0	0	0	0	10.1357	0.000279656	0.134301	Vgll3	PREDICTED: transcription cofactor vestigial-like protein 3 [Anas platyrhynchos]	-	-	-	-	-	-	-
XM_027449365.1	35.14	35.09	49.46	35.89	15.12	20.49	18.23	13.35	3085.21	1674.51	3972.75	2809.48	690.78	2269.41	1392.21	1243.18	1.21134	0.000374402	0.0416555	PTGFRN	PREDICTED: prostaglandin F2 receptor negative regulator isoform X2 [Anas platyrhynchos]	-	-	-	-	-	-	GO:0071840//cellular component organization or biogenesis;GO:0016043//cellular component organization;GO:0006996//organelle organization;GO:0009987//cellular process
XM_027449446.1	0.27	0.11	0.14	0.19	0	0	0	0	40.04	9.12	18.48	25.54	0	0	0	0	7.47168	0.00133869	0.0117153	PHLDB2	PREDICTED: pleckstrin homology-like domain family B member 2 isoform X2 [Gallus gallus]	-	-	-	-	GO:0005856//cytoskeleton;GO:0043228//non-membrane-bounded organelle;GO:0044424//intracellular part;GO:0005622//intracellular;GO:0043229//intracellular organelle;GO:0043232//intracellular non-membrane-bounded organelle;GO:0016020//membrane;GO:0043226//organelle;GO:0044464//cell part;GO:0005623//cell	-	-
XM_027449731.1	4.47	2.18	2.91	3.64	0.11	0.11	0.23	0.11	403.29	107	240	293	5	13	18	11	4.55897	8.2e-07	0.00676965	SCNN1A	PREDICTED: amiloride-sensitive sodium channel subunit alpha [Anas platyrhynchos]	Organismal Systems	Sensory system;Excretory system	ko04742//Taste transduction;ko04960//Aldosterone-regulated sodium reabsorption	K04824	GO:0031224//intrinsic component of membrane;GO:0005886//plasma membrane;GO:0005737//cytoplasm;GO:0098796//membrane protein complex;GO:0016020//membrane;GO:0031988//membrane-bounded vesicle;GO:0042995//cell projection;GO:0043234//protein complex;GO:0044459//plasma membrane part;GO:0044424//intracellular part;GO:0044464//cell part;GO:0044422//organelle part;GO:0044444//cytoplasmic part;GO:0016021//…	GO:0008324//cation transmembrane transporter activity;GO:0005488//binding;GO:0005261//cation channel activity;GO:0015081//sodium ion transmembrane transporter activity;GO:0019904//protein domain specific binding;GO:0046873//metal ion transmembrane transporter activity;GO:0005515//protein binding;GO:0022892//substrate-specific transporter activity;GO:0015075//ion transmembrane transporter activity…	GO:0032501//multicellular organismal process;GO:0044765//single-organism transport;GO:0042592//homeostatic process;GO:0006811//ion transport;GO:0006814//sodium ion transport;GO:0098771//inorganic ion homeostasis;GO:0065008//regulation of biological quality;GO:0006812//cation transport;GO:0050801//ion homeostasis;GO:0055065//metal ion homeostasis;GO:0015672//monovalent inorganic cation transport;G…
XM_027450083.1	0	0	0	0	1.11	0.32	0	2.79	0	0	0	0	87.53	60.22	0	447.78	-10.043	3.41e-05	0.192018	SAMM50	PREDICTED: sorting and assembly machinery component 50 homolog isoform X2 [Anas platyrhynchos]	-	-	-	-	GO:0005737//cytoplasm;GO:0031224//intrinsic component of membrane;GO:0005623//cell;GO:0016020//membrane;GO:0031982//vesicle;GO:0044425//membrane part;GO:0019866//organelle inner membrane;GO:0044444//cytoplasmic part;GO:0044422//organelle part;GO:0031988//membrane-bounded vesicle;GO:0031090//organelle membrane;GO:0005740//mitochondrial envelope;GO:0043227//membrane-bounded organelle;GO:0005622//in…	-	GO:0046907//intracellular transport;GO:0044765//single-organism transport;GO:1902578//single-organism localization;GO:0006810//transport;GO:0006839//mitochondrial transport;GO:0051649//establishment of localization in cell;GO:0051179//localization;GO:0051234//establishment of localization;GO:0051641//cellular localization;GO:0044699//single-organism process;GO:1902582//single-organism intracellul…
XM_027450316.1	0	0	0	0	0	0	0.5	0	0	0	0	0	0	0	356.44	0	-6.96578	0.00664476	0.355918	Obscn	PREDICTED: LOW QUALITY PROTEIN: obscurin [Aptenodytes forsteri]	-	-	-	-	-	-	-
XM_027450360.1	0	0	0	0	4.22	0.95	0	0	0	0	0	0	229.9	125.09	0	0	-10.3359	0.000945523	0.161088	MAP3K3	PREDICTED: mitogen-activated protein kinase kinase kinase 3-like isoform X1 [Anas platyrhynchos]	Human Diseases;Organismal Systems;Environmental Information Processing	Endocrine system;Infectious diseases;Nervous system;Signal transduction	ko04010//MAPK signaling pathway;ko05166//HTLV-I infection;ko04912//GnRH signaling pathway;ko04722//Neurotrophin signaling pathway	K04421	-	GO:0001882//nucleoside binding;GO:0003824//catalytic activity;GO:0097159//organic cyclic compound binding;GO:0001883//purine nucleoside binding;GO:1901363//heterocyclic compound binding;GO:0036094//small molecule binding;GO:0005488//binding;GO:0032550//purine ribonucleoside binding;GO:0016740//transferase activity;GO:0032549//ribonucleoside binding;GO:0097367//carbohydrate derivative binding	GO:0044238//primary metabolic process;GO:0036211//protein modification process;GO:0008152//metabolic process;GO:0044267//cellular protein metabolic process;GO:0006464//cellular protein modification process;GO:0009987//cellular process;GO:0044260//cellular macromolecule metabolic process;GO:0043412//macromolecule modification;GO:0071704//organic substance metabolic process;GO:0044237//cellular met…
XM_027450374.1	3.41	7.72	4.74	3.89	7.06	25.47	9.83	17.85	333.94	410.72	424.67	339.43	359.4	3145.73	837.31	1853.16	-1.60742	0.0012095	0.106376	CSRNP1	PREDICTED: cysteine/serine-rich nuclear protein 1 [Anas platyrhynchos]	-	-	-	-	GO:0043229//intracellular organelle;GO:0043227//membrane-bounded organelle;GO:0044464//cell part;GO:0005622//intracellular;GO:0043226//organelle;GO:0043231//intracellular membrane-bounded organelle;GO:0005623//cell;GO:0044424//intracellular part	GO:0003676//nucleic acid binding;GO:0001071//nucleic acid binding transcription factor activity;GO:1901363//heterocyclic compound binding;GO:0005488//binding;GO:0097159//organic cyclic compound binding;GO:0003677//DNA binding	GO:0007167//enzyme linked receptor protein signaling pathway;GO:0050789//regulation of biological process;GO:0044700//single organism signaling;GO:0007169//transmembrane receptor protein tyrosine kinase signaling pathway;GO:0048856//anatomical structure development;GO:0007154//cell communication;GO:0048731//system development;GO:0010468//regulation of gene expression;GO:0044763//single-organism c…
XM_027450390.1	0	0	0	0	1.29	0.76	0.77	0	0	0	0	0	46.68	67.21	46.8	0	-9.46148	0.00164452	0.0302593	WDR86	PREDICTED: WD repeat-containing protein 86 [Anas platyrhynchos]	-	-	-	-	-	-	-
XM_027450429.1	33.23	40.37	78.19	59.04	15.14	34.27	19.3	15.04	2608.97	1722.84	5615.4	4133.18	618.53	3394.11	1317.84	1252.13	1.33192	0.00102602	0.124141	INSIG1	PREDICTED: insulin-induced gene 1 protein [Anas platyrhynchos]	-	-	-	-	GO:0016020//membrane;GO:0043234//protein complex;GO:0043226//organelle;GO:0044425//membrane part;GO:0044422//organelle part;GO:0043227//membrane-bounded organelle;GO:0032991//macromolecular complex;GO:0031224//intrinsic component of membrane;GO:0031090//organelle membrane	-	GO:0008202//steroid metabolic process;GO:0044281//small molecule metabolic process;GO:0048731//system development;GO:0071704//organic substance metabolic process;GO:0044700//single organism signaling;GO:0010639//negative regulation of organelle organization;GO:0006639//acylglycerol metabolic process;GO:1901360//organic cyclic compound metabolic process;GO:0050793//regulation of developmental proc…
XM_027450442.1	50.11	29.9	58.89	51.07	31.36	17.86	9.02	17.71	1491.62	483.81	1603.52	1355.58	485.62	670.53	233.43	559.06	1.32265	0.00424335	0.0332553	DNAJB6	PREDICTED: dnaJ homolog subfamily B member 6 isoform X2 [Anas platyrhynchos]	-	-	-	-	-	-	-
XM_027450465.1	0	0	0	0	1.76	0	0	0.27	0	0	0	0	115.95	0	0	36.85	-8.98726	0.00581085	0.211737	WDR37	PREDICTED: WD repeat-containing protein 37 [Anas platyrhynchos]	-	-	-	-	-	-	-
XM_027450471.1	0	0	0	0	0.51	0	0.57	0.15	0	0	0	0	22.18	0	41.63	13.03	-8.26444	0.00850035	0.0705386	PITRM1	PREDICTED: presequence protease, mitochondrial, partial [Anas platyrhynchos]	-	-	-	-	-	-	-
XM_027450637.1	0.19	0	0.11	0.18	0	0	0	0	39	0	20	33	0	0	0	0	6.90689	0.00659991	0.0372889	Spag6	PREDICTED: sperm-associated antigen 6 isoform X1 [Calidris pugnax]	-	-	-	-	GO:0005623//cell;GO:0043229//intracellular organelle;GO:0044424//intracellular part;GO:0043226//organelle;GO:0005856//cytoskeleton;GO:0044464//cell part;GO:0043228//non-membrane-bounded organelle;GO:0005622//intracellular;GO:0043232//intracellular non-membrane-bounded organelle	-	GO:0032504//multicellular organism reproduction;GO:0000003//reproduction;GO:0048870//cell motility;GO:0048609//multicellular organismal reproductive process;GO:0007276//gamete generation;GO:0032501//multicellular organismal process;GO:0044699//single-organism process;GO:0051179//localization;GO:0022414//reproductive process;GO:0009987//cellular process;GO:0019953//sexual reproduction;GO:0051674//…
XM_027450770.1	5.99	9.7	21.46	8.33	3.01	5.16	4.34	3.26	333	293	1091	413	87	362	210	192	1.52805	0.00997242	0.154268	CYP51A1	PREDICTED: leucine-rich repeat and death domain-containing protein 1 [Anser cygnoides domesticus]	Metabolism	Global and overview maps;Lipid metabolism	ko01100//Metabolic pathways;ko00100//Steroid biosynthesis	K05917	-	-	-
XM_027450818.1	27.4	17.21	32.96	29.75	7.87	6.08	6.96	8.66	951.73	324.98	1047.2	921.21	142.24	266.48	210.35	319.14	1.85971	8.94e-05	0.0141429	PON2	PREDICTED: serum paraoxonase/arylesterase 2 isoform X1 [Anas platyrhynchos]	-	-	-	-	-	-	-
XM_027450819.1	94.24	126.77	78.21	85.63	273.42	255.71	217.37	283.38	8671	6340	6583	7025	13088	29679	17395	27655	-1.42011	4.03e-06	0.0104233	Pdk4	PREDICTED: pyruvate dehydrogenase kinase, isozyme 4 [Anser cygnoides domesticus]	-	-	-	-	GO:0005622//intracellular;GO:0005623//cell;GO:0031090//organelle membrane;GO:0043229//intracellular organelle;GO:0044446//intracellular organelle part;GO:0043227//membrane-bounded organelle;GO:0043226//organelle;GO:0044422//organelle part;GO:0031967//organelle envelope;GO:0044464//cell part;GO:0031975//envelope;GO:0016020//membrane;GO:0043231//intracellular membrane-bounded organelle;GO:0044424//…	GO:1901363//heterocyclic compound binding;GO:0032550//purine ribonucleoside binding;GO:0001883//purine nucleoside binding;GO:0032549//ribonucleoside binding;GO:0097159//organic cyclic compound binding;GO:0005488//binding;GO:0001882//nucleoside binding;GO:0097367//carbohydrate derivative binding;GO:0036094//small molecule binding	GO:0010033//response to organic substance;GO:0033993//response to lipid;GO:0065007//biological regulation;GO:0042981//regulation of apoptotic process;GO:0043067//regulation of programmed cell death;GO:0036211//protein modification process;GO:0048878//chemical homeostasis;GO:0008610//lipid biosynthetic process;GO:0009058//biosynthetic process;GO:0051193//regulation of cofactor metabolic process;GO…
XM_027451001.1	21.24	12.54	12.06	25.02	3.48	9.03	12.73	6.28	3300.48	1059.29	1713.6	3466.26	281.44	1769.8	1720.11	1035.26	1.1687	0.00854948	0.136295	ANKRD28	PREDICTED: serine/threonine-protein phosphatase 6 regulatory ankyrin repeat subunit A isoform X1 [Anser cygnoides domesticus]	-	-	-	-	-	-	-
XM_027451177.1	0	0	0	0	1.2	0	0.24	1.38	0	0	0	0	113.33	0	37.74	265.62	-9.46148	7.78e-05	0.126555	TGFBR1	PREDICTED: TGF-beta receptor type-1 [Charadrius vociferus]	Human Diseases;Organismal Systems;Cellular Processes;Environmental Information Processing	Cancers;Endocrine system;Transport and catabolism;Development;Signaling molecules and interaction;Signal transduction;Endocrine and metabolic diseases;Infectious diseases;Cell growth and death;Cellular community - eukaryotes;Immune system	ko05200//Pathways in cancer;ko04010//MAPK signaling pathway;ko04144//Endocytosis;ko05166//HTLV-I infection;ko04390//Hippo signaling pathway;ko04060//Cytokine-cytokine receptor interaction;ko04520//Adherens junction;ko05225//Hepatocellular carcinoma;ko04371//Apelin signaling pathway;ko05226//Gastric cancer;ko04218//Cellular senescence;ko04926//Relaxin signaling pathway;ko05161//Hepatitis B;ko04068…	K04674	-	-	-
XM_027451200.1	1.02	1.43	11.77	2.18	1.08	0.64	0.35	0.76	104.69	79.65	1103.99	199.61	57.71	82.15	30.97	83.02	2.53482	0.00497542	0.255869	Nfatc1	PREDICTED: nuclear factor of activated T-cells, cytoplasmic 1 isoform X7 [Coturnix japonica]	Cellular Processes;Environmental Information Processing;Organismal Systems;Human Diseases	Development;Signal transduction;Endocrine system;Immune system;Infectious diseases;Endocrine and metabolic diseases;Cell growth and death;Immune diseases	ko04010//MAPK signaling pathway;ko04024//cAMP signaling pathway;ko04022//cGMP - PKG signaling pathway;ko05166//HTLV-I infection;ko04921//Oxytocin signaling pathway;ko04310//Wnt signaling pathway;ko05163//Human cytomegalovirus infection;ko05167//Kaposi sarcoma-associated herpesvirus infection;ko04218//Cellular senescence;ko04660//T cell receptor signaling pathway;ko05161//Hepatitis B;ko04380//Oste…	K04446	-	-	-
XM_027451276.1	0	0	1.59	0	0	0	0	0	0	0	306.91	0	0	0	0	0	8.63481	0.00976049	0.355918	ATXN1	PREDICTED: ataxin-1 [Anser cygnoides domesticus]	-	-	-	-	GO:0032991//macromolecular complex;GO:0043226//organelle;GO:0043231//intracellular membrane-bounded organelle;GO:0005634//nucleus;GO:0031981//nuclear lumen;GO:0005623//cell;GO:0043227//membrane-bounded organelle;GO:0070013//intracellular organelle lumen;GO:0031974//membrane-enclosed lumen;GO:0043234//protein complex;GO:0044446//intracellular organelle part;GO:0044464//cell part;GO:0044428//nuclea…	GO:0003723//RNA binding;GO:1901363//heterocyclic compound binding;GO:0097159//organic cyclic compound binding;GO:0003727//single-stranded RNA binding;GO:0003676//nucleic acid binding;GO:0005488//binding;GO:0005515//protein binding;GO:0070717//poly-purine tract binding;GO:0008187//poly-pyrimidine tract binding	GO:0051174//regulation of phosphorus metabolic process;GO:1903506//regulation of nucleic acid-templated transcription;GO:0051171//regulation of nitrogen compound metabolic process;GO:0065007//biological regulation;GO:0016482//cytoplasmic transport;GO:0007610//behavior;GO:0019222//regulation of metabolic process;GO:0031326//regulation of cellular biosynthetic process;GO:0051252//regulation of RNA …
XM_027451290.1	6.67	8.41	5.25	5.43	13.91	12.72	18.15	20.79	610	418	439	443	662	1468	1444	2017	-1.3479	0.00082699	0.0172275	IGFBP3	PREDICTED: insulin-like growth factor-binding protein 3 [Serinus canaria]	Cellular Processes;Human Diseases	Cancers;Cell growth and death	ko05202//Transcriptional misregulation in cancers;ko04218//Cellular senescence;ko04115//p53 signaling pathway	K10138	GO:0043229//intracellular organelle;GO:0044421//extracellular region part;GO:0043226//organelle;GO:0043231//intracellular membrane-bounded organelle;GO:0044424//intracellular part;GO:0005623//cell;GO:0031988//membrane-bounded vesicle;GO:0031982//vesicle;GO:0044464//cell part;GO:0005622//intracellular;GO:0005576//extracellular region;GO:0043227//membrane-bounded organelle	GO:0030234//enzyme regulator activity;GO:0019888//protein phosphatase regulator activity;GO:0072542//protein phosphatase activator activity;GO:0005520//insulin-like growth factor binding;GO:0019211//phosphatase activator activity;GO:0005515//protein binding;GO:0019208//phosphatase regulator activity;GO:0008047//enzyme activator activity;GO:0098772//molecular function regulator;GO:0005488//binding…	GO:0008285//negative regulation of cell proliferation;GO:0048583//regulation of response to stimulus;GO:0032268//regulation of cellular protein metabolic process;GO:0051174//regulation of phosphorus metabolic process;GO:0010675//regulation of cellular carbohydrate metabolic process;GO:2000145//regulation of cell motility;GO:0048584//positive regulation of response to stimulus;GO:0042127//regulati…
XM_027451346.1	0	0	0	0	0.53	0.81	0.37	1.13	0	0	0	0	18.19	68.37	21.67	79.47	-9.47168	0.000180293	0.02475	Acss3	PREDICTED: acyl-CoA synthetase short-chain family member 3, mitochondrial [Charadrius vociferus]	Metabolism	Global and overview maps;Carbohydrate metabolism	ko01100//Metabolic pathways;ko00640//Propanoate metabolism	K01908	GO:0043231//intracellular membrane-bounded organelle;GO:0044424//intracellular part;GO:0043229//intracellular organelle;GO:0043226//organelle;GO:0043227//membrane-bounded organelle;GO:0044464//cell part;GO:0005622//intracellular;GO:0005623//cell	-	-
XM_027451430.1	132.43	127.01	117.27	184.76	65.53	49.25	66.29	34.24	7458	3888	6041	9277	1920	3499	3247	2045	1.38279	4.6e-05	0.0164043	EEPD1	Endonuclease/exonuclease/phosphatase family domain-containing protein 1, partial [Anas platyrhynchos]	-	-	-	-	-	-	-
XM_027451602.1	7.12	6.47	7.78	6.38	0.02	0	0	0	455.45	225.05	455.75	364.23	0.77	0	0	0	10.4383	3.51e-16	0.00046356	Txndc5	PREDICTED: thioredoxin domain-containing protein 5 isoform X1 [Coturnix japonica]	Genetic Information Processing	Folding, sorting and degradation	ko04141//Protein processing in endoplasmic reticulum	K13984	GO:0044422//organelle part;GO:0005622//intracellular;GO:0044446//intracellular organelle part;GO:0005623//cell;GO:0043231//intracellular membrane-bounded organelle;GO:0044444//cytoplasmic part;GO:0043229//intracellular organelle;GO:0043226//organelle;GO:0044424//intracellular part;GO:0012505//endomembrane system;GO:0005783//endoplasmic reticulum;GO:0005737//cytoplasm;GO:0043227//membrane-bounded …	GO:0003824//catalytic activity	GO:0065007//biological regulation;GO:0044699//single-organism process;GO:0042592//homeostatic process;GO:0009987//cellular process;GO:0019725//cellular homeostasis;GO:0065008//regulation of biological quality;GO:0044763//single-organism cellular process
XM_027451663.1	0	0	0	0	0	0.57	0.69	0.26	0	0	0	0	0	70.96	59	27	-8.56986	0.00261437	0.0500044	CDH20	PREDICTED: cadherin-20 [Anser cygnoides domesticus]	-	-	-	-	GO:0031224//intrinsic component of membrane;GO:0016020//membrane;GO:0044425//membrane part	GO:0043169//cation binding;GO:0043167//ion binding;GO:0005488//binding	GO:0022610//biological adhesion;GO:0098609//cell-cell adhesion;GO:0007155//cell adhesion;GO:0098742//cell-cell adhesion via plasma-membrane adhesion molecules
XM_027451707.1	9.28	6.94	31.55	13.29	1.42	4.28	1.7	4.11	378.84	153.96	1178.54	483.67	30.25	220.33	60.23	177.78	2.40734	0.000674719	0.107476	Tubb2b	PREDICTED: tubulin beta-1 chain isoform X1 [Melopsittacus undulatus]	Cellular Processes;Human Diseases	Cellular community - eukaryotes;Transport and catabolism;Infectious diseases	ko04540//Gap junction;ko04145//Phagosome;ko05130//Pathogenic Escherichia coli infection	K07375	GO:0005623//cell;GO:0043227//membrane-bounded organelle;GO:0043226//organelle;GO:0043231//intracellular membrane-bounded organelle;GO:0015630//microtubule cytoskeleton;GO:0043232//intracellular non-membrane-bounded organelle;GO:0005622//intracellular;GO:0043228//non-membrane-bounded organelle;GO:0005856//cytoskeleton;GO:0043229//intracellular organelle;GO:0032991//macromolecular complex;GO:004442…	GO:0097367//carbohydrate derivative binding;GO:0001883//purine nucleoside binding;GO:0016817//hydrolase activity, acting on acid anhydrides;GO:0097159//organic cyclic compound binding;GO:0005488//binding;GO:0016818//hydrolase activity, acting on acid anhydrides, in phosphorus-containing anhydrides;GO:0001882//nucleoside binding;GO:0032550//purine ribonucleoside binding;GO:0017111//nucleoside-trip…	GO:0044699//single-organism process;GO:0070271//protein complex biogenesis;GO:0065003//macromolecular complex assembly;GO:0051179//localization;GO:0006461//protein complex assembly;GO:0016477//cell migration;GO:0044085//cellular component biogenesis;GO:0071822//protein complex subunit organization;GO:0071840//cellular component organization or biogenesis;GO:0022607//cellular component assembly;GO…
XM_027451773.1	10.05	9.12	12.42	8.55	19.04	25.16	14.32	34.32	1386.96	684.06	1568.19	1052.27	1367.06	4380.11	1718.84	5023.07	-1.20971	0.00117382	0.08455	COBL	PREDICTED: protein cordon-bleu isoform X8 [Anas platyrhynchos]	-	-	-	-	-	-	-
XM_027451798.1	1.14	0.7	0.03	0.54	0	0.02	0.03	0.03	83	28	2	35	0	2	2	2	4.91289	0.00685933	0.0804691	Epb41l4b	PREDICTED: band 4.1-like protein 4B isoform X5 [Coturnix japonica]	Cellular Processes	Cellular community - eukaryotes	ko04530//Tight junction	K21111	-	-	-
XM_027451862.1	0	0	0	0	0	0.76	0	1.11	0	0	0	0	0	148.03	0	181.8	-8.86882	0.00286905	0.137325	Nr4a3	PREDICTED: nuclear receptor subfamily 4 group A member 3 [Nipponia nippon]	Human Diseases	Cancers	ko05202//Transcriptional misregulation in cancers	K08559	GO:0032991//macromolecular complex;GO:0005622//intracellular;GO:0043227//membrane-bounded organelle;GO:0043231//intracellular membrane-bounded organelle;GO:0044464//cell part;GO:0043229//intracellular organelle;GO:0043234//protein complex;GO:0005623//cell;GO:0043226//organelle;GO:0044424//intracellular part	GO:0004871//signal transducer activity;GO:0005488//binding;GO:0003677//DNA binding;GO:0000981//RNA polymerase II transcription factor activity, sequence-specific DNA binding;GO:0004872//receptor activity;GO:0046914//transition metal ion binding;GO:0003676//nucleic acid binding;GO:0043167//ion binding;GO:0043169//cation binding;GO:0097159//organic cyclic compound binding;GO:0001071//nucleic acid b…	GO:0043067//regulation of programmed cell death;GO:0030030//cell projection organization;GO:0060255//regulation of macromolecule metabolic process;GO:0050896//response to stimulus;GO:0050905//neuromuscular process;GO:0065007//biological regulation;GO:0071310//cellular response to organic substance;GO:0048812//neuron projection morphogenesis;GO:2000112//regulation of cellular macromolecule biosynt…
XM_027451863.1	0.01	0.69	0.6	0.18	0.31	12.71	0.08	3.81	2.05	56.96	84.47	24.26	24.92	2451.04	11.06	618.57	-3.51421	0.00554729	0.249546	Nr4a3	PREDICTED: nuclear receptor subfamily 4 group A member 3 [Nipponia nippon]	Human Diseases	Cancers	ko05202//Transcriptional misregulation in cancers	K08559	GO:0005623//cell;GO:0043234//protein complex;GO:0032991//macromolecular complex;GO:0043229//intracellular organelle;GO:0043226//organelle;GO:0044464//cell part;GO:0043227//membrane-bounded organelle;GO:0044424//intracellular part;GO:0005622//intracellular;GO:0043231//intracellular membrane-bounded organelle	GO:0001071//nucleic acid binding transcription factor activity;GO:0043167//ion binding;GO:1901363//heterocyclic compound binding;GO:0004871//signal transducer activity;GO:0046914//transition metal ion binding;GO:0043169//cation binding;GO:0003676//nucleic acid binding;GO:0005488//binding;GO:0046872//metal ion binding;GO:0038023//signaling receptor activity;GO:0004872//receptor activity;GO:0003677…	GO:0035295//tube development;GO:0044763//single-organism cellular process;GO:0006950//response to stress;GO:0019219//regulation of nucleobase-containing compound metabolic process;GO:0010033//response to organic substance;GO:0009790//embryo development;GO:0048858//cell projection morphogenesis;GO:0050794//regulation of cellular process;GO:0030030//cell projection organization;GO:0035239//tube mor…
XM_027452000.1	5.5	42.7	46.63	72.57	295.06	99.93	107.73	91.46	137.42	580.23	1066.43	1617.64	3837.45	3151.52	2342.51	2425.09	-1.8276	0.00246924	0.00450749	Rlc-a	PREDICTED: myosin regulatory light chain 2, smooth muscle minor isoform isoform X1 [Haliaeetus leucocephalus]	Organismal Systems;Cellular Processes	Immune system;Cellular community - eukaryotes;Cell motility	ko04810//Regulation of actin cytoskeleton;ko04510//Focal adhesion;ko04530//Tight junction;ko04611//Platelet activation;ko04670//Leukocyte transendothelial migration	K12757	-	-	-
XM_027452056.1	19.47	15.3	15.6	21.77	6.61	12.25	5.59	2.41	1473.44	629.38	1079.96	1468.32	260.35	1169.62	367.71	193.64	1.42534	0.00372192	0.0703111	TWSG1	PREDICTED: twisted gastrulation protein homolog 1 [Anser cygnoides domesticus]	-	-	-	-	-	-	-
XM_027452196.1	0	0	0	0	0	0	1.5	0.43	0.02	0	0.01	0.02	0	0	177	62	-8.91439	0.00366819	0.202204	AQP4	PREDICTED: aquaporin-4 isoform X1 [Gallus gallus]	Organismal Systems	Excretory system;Digestive system	ko04976//Bile secretion;ko04962//Vasopressin-regulated water reabsorption	K09866	GO:0044464//cell part;GO:0016020//membrane;GO:0044425//membrane part;GO:0005623//cell;GO:0031224//intrinsic component of membrane;GO:0005886//plasma membrane;GO:0071944//cell periphery;GO:0030054//cell junction;GO:0044459//plasma membrane part	GO:0005372//water transmembrane transporter activity;GO:0005215//transporter activity;GO:0022892//substrate-specific transporter activity;GO:0022891//substrate-specific transmembrane transporter activity;GO:0022857//transmembrane transporter activity	GO:1902578//single-organism localization;GO:0006810//transport;GO:0006950//response to stress;GO:0050896//response to stimulus;GO:0045087//innate immune response;GO:0050878//regulation of body fluid levels;GO:0003097//renal water transport;GO:0065007//biological regulation;GO:0030104//water homeostasis;GO:0006952//defense response;GO:0044707//single-multicellular organism process;GO:0050891//mult…
XM_027452249.1	0	7.04	1.06	0	0	0	0	0	0	282.34	71.43	0	0	0	0	0.19	10.9837	0.000666863	0.233866	Lyn	PREDICTED: tyrosine-protein kinase Lyn isoform X2 [Anas platyrhynchos]	Environmental Information Processing;Organismal Systems;Human Diseases	Cancers;Infectious diseases;Nervous system;Signal transduction;Immune system	ko05169//Epstein-Barr virus infection;ko05203//Viral carcinogenesis;ko05167//Kaposi sarcoma-associated herpesvirus infection;ko04062//Chemokine signaling pathway;ko04611//Platelet activation;ko04666//Fc gamma R-mediated phagocytosis;ko04064//NF-kappa B signaling pathway;ko04730//Long-term depression;ko04664//Fc epsilon RI signaling pathway;ko04662//B cell receptor signaling pathway;ko05120//Epith…	K05854	GO:0043229//intracellular organelle;GO:0005623//cell;GO:0044464//cell part;GO:0044444//cytoplasmic part;GO:0005622//intracellular;GO:0043231//intracellular membrane-bounded organelle;GO:0043227//membrane-bounded organelle;GO:0031988//membrane-bounded vesicle;GO:0043226//organelle;GO:0044424//intracellular part;GO:0005737//cytoplasm;GO:0016020//membrane;GO:0031982//vesicle;GO:0044425//membrane par…	GO:0004713//protein tyrosine kinase activity;GO:0032549//ribonucleoside binding;GO:0004672//protein kinase activity;GO:0016740//transferase activity;GO:0032550//purine ribonucleoside binding;GO:0003824//catalytic activity;GO:0036094//small molecule binding;GO:1901363//heterocyclic compound binding;GO:0005515//protein binding;GO:0001882//nucleoside binding;GO:0016773//phosphotransferase activity, …	GO:0048519//negative regulation of biological process;GO:0010604//positive regulation of macromolecule metabolic process;GO:0008284//positive regulation of cell proliferation;GO:0010646//regulation of cell communication;GO:0022008//neurogenesis;GO:0002703//regulation of leukocyte mediated immunity;GO:0030888//regulation of B cell proliferation;GO:0070302//regulation of stress-activated protein ki…
XM_027452282.1	23.49	14.75	16.54	12.15	49.32	29.73	45.92	124.66	2028	692	1306	935	2215	3238	3448	11415	-1.89907	2.3e-05	0.12428	TTPA	PREDICTED: alpha-tocopherol transfer protein [Gallus gallus]	-	-	-	-	GO:0005623//cell;GO:0044464//cell part	GO:0005488//binding;GO:0008289//lipid binding;GO:0043168//anion binding;GO:1902936//phosphatidylinositol bisphosphate binding;GO:1901981//phosphatidylinositol phosphate binding;GO:0005543//phospholipid binding;GO:0043167//ion binding;GO:0035091//phosphatidylinositol binding	GO:0045596//negative regulation of cell differentiation;GO:0065007//biological regulation;GO:0044765//single-organism transport;GO:0042221//response to chemical;GO:0050896//response to stimulus;GO:0060284//regulation of cell development;GO:0010721//negative regulation of cell development;GO:0006775//fat-soluble vitamin metabolic process;GO:0051093//negative regulation of developmental process;GO:…
XM_027452355.1	0	0	0	0	0	0.48	0.83	0.72	0	0	0	0	0	50.23	59.91	63.49	-8.98726	0.00186641	0.0257684	STAU2	PREDICTED: double-stranded RNA-binding protein Staufen homolog 2 isoform X1 [Anas platyrhynchos]	-	-	-	-	-	-	-
XM_027452425.1	0	1.26	0	1.53	0	0	0	0	0	90.41	0	180.41	0	0	0	0	9.44605	0.00217753	0.168029	APAF1	PREDICTED: apoptotic protease-activating factor 1 isoform X1 [Anas platyrhynchos]	Human Diseases;Cellular Processes	Neurodegenerative diseases;Cell growth and death;Infectious diseases;Cancers;Drug resistance	ko05200//Pathways in cancer;ko05152//Tuberculosis;ko05010//Alzheimer disease;ko05016//Huntington disease;ko04210//Apoptosis;ko05161//Hepatitis B;ko05222//Small cell lung cancer;ko05012//Parkinson disease;ko04115//p53 signaling pathway;ko05014//Amyotrophic lateral sclerosis (ALS);ko01524//Platinum drug resistance;ko05134//Legionellosis;ko04215//Apoptosis - multiple species	K02084	GO:0043229//intracellular organelle;GO:0005737//cytoplasm;GO:0044424//intracellular part;GO:0032991//macromolecular complex;GO:0044444//cytoplasmic part;GO:0043227//membrane-bounded organelle;GO:0031982//vesicle;GO:0005622//intracellular;GO:0043226//organelle;GO:0005623//cell;GO:0031988//membrane-bounded vesicle;GO:0043234//protein complex;GO:0044464//cell part;GO:0043231//intracellular membrane-…	GO:0032550//purine ribonucleoside binding;GO:0097159//organic cyclic compound binding;GO:0061134//peptidase regulator activity;GO:0001882//nucleoside binding;GO:0008047//enzyme activator activity;GO:0016504//peptidase activator activity;GO:0032549//ribonucleoside binding;GO:0005515//protein binding;GO:0036094//small molecule binding;GO:1901363//heterocyclic compound binding;GO:0016505//peptidase …	GO:0051604//protein maturation;GO:0019222//regulation of metabolic process;GO:0009893//positive regulation of metabolic process;GO:0008219//cell death;GO:0043170//macromolecule metabolic process;GO:0016265//death;GO:0010604//positive regulation of macromolecule metabolic process;GO:0043068//positive regulation of programmed cell death;GO:0051247//positive regulation of protein metabolic process;G…
XM_027452463.1	0.01	0	0	0	0.01	0	0	4.28	0.86	0.41	0.07	0.58	0.78	0.34	0	694.55	-8.74483	0.00217769	0.356192	Rbm12b1	PREDICTED: RNA-binding protein 12B [Anas platyrhynchos]	-	-	-	-	-	GO:0005488//binding;GO:0003723//RNA binding;GO:0097159//organic cyclic compound binding;GO:1901363//heterocyclic compound binding;GO:0003676//nucleic acid binding	-
XM_027452727.1	0	0	0	0	0.59	0.24	0.21	0	0	0	0	0	64.5	64.32	39.44	0	-8.02237	0.00128229	0.0325861	PHF20L1	PREDICTED: PHD finger protein 20-like protein 1 isoform X5 [Anas platyrhynchos]	-	-	-	-	-	-	-
XM_027452912.1	3.95	0	0	0	0	0	0	0	537.93	0	0	0	0	0	0	0	9.94764	0.00423886	0.355918	DHX36	PREDICTED: putative ATP-dependent RNA helicase DHX30 [Aptenodytes forsteri]	-	-	-	-	GO:0005623//cell;GO:0043226//organelle;GO:0005622//intracellular;GO:0043229//intracellular organelle;GO:0043227//membrane-bounded organelle;GO:0044424//intracellular part;GO:0043231//intracellular membrane-bounded organelle;GO:0044464//cell part;GO:0009295//nucleoid	GO:0042623//ATPase activity, coupled;GO:0017111//nucleoside-triphosphatase activity;GO:0036094//small molecule binding;GO:0001883//purine nucleoside binding;GO:1901363//heterocyclic compound binding;GO:0001882//nucleoside binding;GO:0005488//binding;GO:0016787//hydrolase activity;GO:0003676//nucleic acid binding;GO:0016817//hydrolase activity, acting on acid anhydrides;GO:0016462//pyrophosphatase…	-
XM_027453121.1	0	0	0	0	0	0	2.23	0.12	0	0	0	0	0	0	186.05	12.56	-9.19845	0.00671216	0.317633	MARK1	PREDICTED: serine/threonine-protein kinase MARK1 isoform X7 [Anser cygnoides domesticus]	-	-	-	-	-	GO:1901363//heterocyclic compound binding;GO:0004672//protein kinase activity;GO:0097367//carbohydrate derivative binding;GO:0036094//small molecule binding;GO:0032550//purine ribonucleoside binding;GO:0032549//ribonucleoside binding;GO:0097159//organic cyclic compound binding;GO:0016772//transferase activity, transferring phosphorus-containing groups;GO:0003824//catalytic activity;GO:0001882//nu…	GO:0008152//metabolic process;GO:0044267//cellular protein metabolic process;GO:0036211//protein modification process;GO:0043412//macromolecule modification;GO:0009987//cellular process;GO:0044238//primary metabolic process;GO:0044260//cellular macromolecule metabolic process;GO:0044237//cellular metabolic process;GO:0006796//phosphate-containing compound metabolic process;GO:0071704//organic sub…
XM_027453167.1	0	0	0	0	0	0.73	0.73	1.77	0	0	0	0	0	48.05	32.74	97.7	-9.65732	0.00200848	0.0706306	KIZ	PREDICTED: centrosomal protein kizuna [Anas platyrhynchos]	-	-	-	-	-	-	-
XM_027453415.1	0	2.78	1.04	0	0	0	0	0	0	106.81	67.34	0	0	0	0	0	9.89936	0.00468223	0.150161	CEP68	PREDICTED: LOW QUALITY PROTEIN: centrosomal protein of 68 kDa [Anser cygnoides domesticus]	-	-	-	-	-	GO:0019900//kinase binding;GO:0005515//protein binding;GO:0005488//binding;GO:0019899//enzyme binding	GO:0009987//cellular process;GO:1902589//single-organism organelle organization;GO:0070727//cellular macromolecule localization;GO:0007017//microtubule-based process;GO:0044763//single-organism cellular process;GO:0033036//macromolecule localization;GO:0034613//cellular protein localization;GO:0007010//cytoskeleton organization;GO:0031023//microtubule organizing center organization;GO:0008104//pr…
XM_027453572.1	8.72	1.34	0	0	0	0	0	0	500.09	41.65	0	0	0	0	0	0	11.2963	0.000838423	0.309254	usp106	LUC7 like 2, pre-mRNA splicing factor [Gallus gallus]	-	-	-	-	GO:0043229//intracellular organelle;GO:0044446//intracellular organelle part;GO:0030532//small nuclear ribonucleoprotein complex;GO:0044424//intracellular part;GO:0005634//nucleus;GO:0043227//membrane-bounded organelle;GO:0005623//cell;GO:1990904//ribonucleoprotein complex;GO:0043231//intracellular membrane-bounded organelle;GO:0044428//nuclear part;GO:0032991//macromolecular complex;GO:0043226//…	-	GO:0009987//cellular process;GO:0043933//macromolecular complex subunit organization;GO:0065007//biological regulation;GO:0022607//cellular component assembly;GO:0016202//regulation of striated muscle tissue development;GO:1901861//regulation of muscle tissue development;GO:0071826//ribonucleoprotein complex subunit organization;GO:0034622//cellular macromolecular complex assembly;GO:2000026//reg…
XM_027453713.1	0	0	0	0	1.94	0	0	0.52	0	0	0	0	112.14	0	0	61.03	-9.26444	0.00477582	0.161069	RPS6KC1	PREDICTED: ribosomal protein S6 kinase delta-1 isoform X2 [Anas platyrhynchos]	-	-	-	-	-	-	-
XM_027453844.1	0	0	0	0	1.05	0	0.62	0	0	0	0	0	78.96	0	78.85	0	-8.70563	0.00575155	0.133975	AKT3	PREDICTED: RAC-gamma serine/threonine-protein kinase isoform X1 [Taeniopygia guttata]	Human Diseases;Organismal Systems;Environmental Information Processing;Cellular Processes	Circulatory system;Endocrine and metabolic diseases;Immune system;Transport and catabolism;Nervous system;Cardiovascular diseases;Infectious diseases;Drug resistance;Aging;Cell growth and death;Cellular community - eukaryotes;Cancers;Endocrine system;Development;Digestive system;Signal transduction	ko05200//Pathways in cancer;ko05165//Human papillomavirus infection;ko04010//MAPK signaling pathway;ko04151//PI3K-Akt signaling pathway;ko04024//cAMP signaling pathway;ko05205//Proteoglycans in cancer;ko04014//Ras signaling pathway;ko04015//Rap1 signaling pathway;ko04510//Focal adhesion;ko04022//cGMP - PKG signaling pathway;ko05166//HTLV-I infection;ko04261//Adrenergic signaling in cardiomyocytes…	K04456	GO:0005623//cell;GO:0044422//organelle part;GO:0044428//nuclear part;GO:0043227//membrane-bounded organelle;GO:0031974//membrane-enclosed lumen;GO:0044464//cell part;GO:0070013//intracellular organelle lumen;GO:0031981//nuclear lumen;GO:0043226//organelle;GO:0044424//intracellular part;GO:0043233//organelle lumen;GO:0043231//intracellular membrane-bounded organelle;GO:0005634//nucleus;GO:0043229/…	GO:0036094//small molecule binding;GO:1901363//heterocyclic compound binding;GO:0003824//catalytic activity;GO:0032549//ribonucleoside binding;GO:0016773//phosphotransferase activity, alcohol group as acceptor;GO:0016772//transferase activity, transferring phosphorus-containing groups;GO:0004672//protein kinase activity;GO:0097367//carbohydrate derivative binding;GO:0097159//organic cyclic compou…	GO:0006464//cellular protein modification process;GO:0044267//cellular protein metabolic process;GO:0006793//phosphorus metabolic process;GO:0065007//biological regulation;GO:0006796//phosphate-containing compound metabolic process;GO:0019538//protein metabolic process;GO:0050794//regulation of cellular process;GO:0044237//cellular metabolic process;GO:0050789//regulation of biological process;GO…
XM_027453867.1	0	0	0	0	0	0.62	1.7	0.74	0	0	0	0	0	53.26	100.4	53.2	-9.57932	0.00113065	0.0452188	Sccpdh	PREDICTED: saccharopine dehydrogenase-like oxidoreductase [Coturnix japonica]	-	-	-	-	GO:0043232//intracellular non-membrane-bounded organelle;GO:0005623//cell;GO:0043226//organelle;GO:0044424//intracellular part;GO:0044464//cell part;GO:0043231//intracellular membrane-bounded organelle;GO:0043228//non-membrane-bounded organelle;GO:0043227//membrane-bounded organelle;GO:0005622//intracellular;GO:0043229//intracellular organelle	-	GO:0044699//single-organism process;GO:0008152//metabolic process;GO:0044710//single-organism metabolic process
XM_027454191.1	38.03	21.74	22.1	26.69	8.63	11.24	8.1	6.83	2177.37	676.56	1157.54	1362.63	257.03	811.5	403.21	414.69	1.64133	6.41e-05	0.040402	fam89a	PREDICTED: protein FAM89A [Gallus gallus]	-	-	-	-	-	-	-
XM_027454262.1	0.42	0	0	1.14	0	0	0	0	76.7	0	0	185.54	0	0	0	0.01	8.60733	0.00312902	0.185871	QKI	PREDICTED: protein quaking isoform X4 [Anser cygnoides domesticus]	-	-	-	-	-	GO:1901363//heterocyclic compound binding;GO:0005488//binding;GO:0044822//poly(A) RNA binding;GO:0097159//organic cyclic compound binding;GO:0003676//nucleic acid binding;GO:0003723//RNA binding	GO:0048609//multicellular organismal reproductive process;GO:0051248//negative regulation of protein metabolic process;GO:0048519//negative regulation of biological process;GO:0044702//single organism reproductive process;GO:0007275//multicellular organism development;GO:0031327//negative regulation of cellular biosynthetic process;GO:0034249//negative regulation of cellular amide metabolic proce…
XM_027454290.1	6.71	14.83	24.6	5.53	2.58	5.69	1.55	0.85	1164.29	1397.41	3902.53	854.59	233.01	1244.74	233.04	155.41	2.27577	0.000212933	0.11766	FNDC1	PREDICTED: fibronectin type III domain-containing protein 1, partial [Anas platyrhynchos]	-	-	-	-	-	-	-
XM_027454347.1	55.68	67.32	62.62	75.16	27.3	40.28	27.59	19.55	6813.48	4477.4	7009.28	8199.68	1737.88	6218.19	2935.94	2536.85	1.18472	0.000303059	0.0405784	Ust	PREDICTED: uronyl 2-sulfotransferase isoform X3 [Coturnix japonica]	Metabolism	Glycan biosynthesis and metabolism	ko00532//Glycosaminoglycan biosynthesis - chondroitin sulfate / dermatan sulfate	K03193	GO:0031224//intrinsic component of membrane;GO:0016020//membrane;GO:0044425//membrane part	-	-
XM_027454382.1	0	0	0	0	0	0	3.38	0.78	0	0	0	0	0	0	374.3	105.96	-10.0224	0.000715857	0.223011	CNKSR3	PREDICTED: connector enhancer of kinase suppressor of ras 3, partial [Anser cygnoides domesticus]	-	-	-	-	-	-	-
XM_027454437.1	0.63	0.23	0.6	0.27	0	0	0	0	60.74	12.2	52.95	22.83	0	0	0	0	8.75656	0.000320164	0.0189196	Reps1	PREDICTED: ralBP1-associated Eps domain-containing protein 1 isoform X1 [Haliaeetus leucocephalus]	-	-	-	-	-	-	-
XM_027454438.1	0	0	0	0	0.86	0.13	0.58	0	0	0	0	0	42.71	15.69	48.41	0	-8.61655	0.00409018	0.0577927	Reps1	PREDICTED: ralBP1-associated Eps domain-containing protein 1 isoform X6 [Gallus gallus]	-	-	-	-	-	-	-
XM_027454531.1	18.97	21.89	20.5	16.68	5.5	5.55	6.65	3.46	1683.46	1056.11	1664.39	1320	254	621	513.08	326	1.88287	2.84e-06	0.00113277	TMEM200A	PREDICTED: transmembrane protein 200A [Anas platyrhynchos]	-	-	-	-	-	-	-
XM_027454570.1	1.88	2.87	1.65	3.37	8.64	6.3	10	6.22	217.31	180.22	174.47	346.8	518.44	916.99	1003.66	760.89	-1.67326	0.000621154	0.00242197	PTPRK	PREDICTED: receptor-type tyrosine-protein phosphatase kappa isoform X10 [Coturnix japonica]	-	-	-	-	-	-	-
XM_027454678.1	1.01	0.53	0	0	0	0	0	0	172.25	48.67	0	0	0	0	0	0	8.58871	0.0048452	0.223193	DSE	PREDICTED: dermatan-sulfate epimerase isoform X1 [Anas platyrhynchos]	Metabolism	Glycan biosynthesis and metabolism;Global and overview maps	ko01100//Metabolic pathways;ko00532//Glycosaminoglycan biosynthesis - chondroitin sulfate / dermatan sulfate	K01794	GO:0044424//intracellular part;GO:0043229//intracellular organelle;GO:0044464//cell part;GO:0005623//cell;GO:0043227//membrane-bounded organelle;GO:0043226//organelle;GO:0043231//intracellular membrane-bounded organelle;GO:0005622//intracellular	GO:0016854//racemase and epimerase activity;GO:0016857//racemase and epimerase activity, acting on carbohydrates and derivatives;GO:0003824//catalytic activity;GO:0016853//isomerase activity	GO:0043170//macromolecule metabolic process;GO:0006023//aminoglycan biosynthetic process;GO:0044710//single-organism metabolic process;GO:0044711//single-organism biosynthetic process;GO:0009059//macromolecule biosynthetic process;GO:1901137//carbohydrate derivative biosynthetic process;GO:1901564//organonitrogen compound metabolic process;GO:1901566//organonitrogen compound biosynthetic process;…
XM_027454705.1	0	2.43	0.24	1.07	0	0	0	0	0	40.56	6.87	29.21	0	0	0	0	9.86882	0.00809233	0.0896086	GTF3C6	PREDICTED: general transcription factor 3C polypeptide 6 [Anas platyrhynchos]	-	-	-	-	-	GO:0005488//binding;GO:0003676//nucleic acid binding;GO:0097159//organic cyclic compound binding;GO:1901363//heterocyclic compound binding	GO:0044271//cellular nitrogen compound biosynthetic process;GO:0010467//gene expression;GO:0006807//nitrogen compound metabolic process;GO:0008152//metabolic process;GO:0043170//macromolecule metabolic process;GO:0019438//aromatic compound biosynthetic process;GO:0044260//cellular macromolecule metabolic process;GO:0009058//biosynthetic process;GO:0046483//heterocycle metabolic process;GO:0034641…
XM_027454755.1	5.97	6.04	16.71	2.39	24.03	30.79	5.28	58.18	182	100	466	65	381	1184	140	1881	-1.92676	0.007263	0.139516	Cd24	PREDICTED: signal transducer CD24 [Coturnix japonica]	Organismal Systems	Immune system	ko04640//Hematopoietic cell lineage	K06469	-	-	-
XM_027454781.1	0	0	0	0	0	4.74	6.01	0	0	0	0	0	0	543.32	475.06	0	-11.392	9.59e-05	0.135413	HACE1	PREDICTED: E3 ubiquitin-protein ligase HACE1 isoform X1 [Gallus gallus]	-	-	-	-	-	GO:0016740//transferase activity;GO:0017016//Ras GTPase binding;GO:0003824//catalytic activity;GO:0005488//binding;GO:0051020//GTPase binding;GO:0019787//ubiquitin-like protein transferase activity;GO:0005515//protein binding;GO:0017048//Rho GTPase binding;GO:0019899//enzyme binding;GO:0031267//small GTPase binding	GO:0016567//protein ubiquitination;GO:0016477//cell migration;GO:0000209//protein polyubiquitination;GO:0016043//cellular component organization;GO:0043412//macromolecule modification;GO:0051179//localization;GO:0071840//cellular component organization or biogenesis;GO:0019538//protein metabolic process;GO:0008152//metabolic process;GO:0048870//cell motility;GO:0009987//cellular process;GO:007170…
XM_027454877.1	0	0	0	0	0.26	0.18	0.2	0.24	0	0	0	0	17.61	29.19	22.34	34.17	-7.78136	0.000970311	0.000404284	BACH2	PREDICTED: transcription regulator protein BACH2 isoform X3 [Anas platyrhynchos]	-	-	-	-	GO:0043231//intracellular membrane-bounded organelle;GO:0044464//cell part;GO:0005623//cell;GO:0043229//intracellular organelle;GO:0044424//intracellular part;GO:0043227//membrane-bounded organelle;GO:0043226//organelle;GO:0005622//intracellular	GO:0003690//double-stranded DNA binding;GO:0001071//nucleic acid binding transcription factor activity;GO:0001067//regulatory region nucleic acid binding;GO:0043565//sequence-specific DNA binding;GO:0003677//DNA binding;GO:0005488//binding;GO:0000981//RNA polymerase II transcription factor activity, sequence-specific DNA binding;GO:0000977//RNA polymerase II regulatory region sequence-specific DN…	GO:0044260//cellular macromolecule metabolic process;GO:0034645//cellular macromolecule biosynthetic process;GO:0071704//organic substance metabolic process;GO:0044237//cellular metabolic process;GO:0009987//cellular process;GO:0060255//regulation of macromolecule metabolic process;GO:0008152//metabolic process;GO:1901576//organic substance biosynthetic process;GO:0044249//cellular biosynthetic p…
XM_027454948.1	4.94	14.87	47.97	14.02	8.92	4.29	3.85	3.81	582.49	952.5	5172.11	1473.79	547.27	638.52	394.18	476.26	1.97067	0.000824239	0.198529	PRSS35	PREDICTED: inactive serine protease 35 [Anas platyrhynchos]	-	-	-	-	GO:0043229//intracellular organelle;GO:0044464//cell part;GO:0043231//intracellular membrane-bounded organelle;GO:0043226//organelle;GO:0043227//membrane-bounded organelle;GO:0044424//intracellular part;GO:0005622//intracellular;GO:0005623//cell	GO:0016787//hydrolase activity;GO:0008233//peptidase activity;GO:0003824//catalytic activity;GO:0004175//endopeptidase activity;GO:0070011//peptidase activity, acting on L-amino acid peptides	GO:0044238//primary metabolic process;GO:0043170//macromolecule metabolic process;GO:0071704//organic substance metabolic process;GO:0008152//metabolic process;GO:0019538//protein metabolic process
XM_027454949.1	18.45	16	105.4	35.68	11.9	8.07	2.53	4.85	2142.36	1009.77	11196.3	3694.07	718.86	1181.63	255.09	597.55	2.6821	1.24e-05	0.148103	PRSS35	PREDICTED: inactive serine protease 35 [Anas platyrhynchos]	-	-	-	-	GO:0044424//intracellular part;GO:0043229//intracellular organelle;GO:0044464//cell part;GO:0043227//membrane-bounded organelle;GO:0043226//organelle;GO:0043231//intracellular membrane-bounded organelle;GO:0005623//cell;GO:0005622//intracellular	GO:0016787//hydrolase activity;GO:0070011//peptidase activity, acting on L-amino acid peptides;GO:0003824//catalytic activity;GO:0004175//endopeptidase activity;GO:0008233//peptidase activity	GO:0019538//protein metabolic process;GO:0071704//organic substance metabolic process;GO:0044238//primary metabolic process;GO:0043170//macromolecule metabolic process;GO:0008152//metabolic process
XM_027455226.1	0	0	0	12.62	0	0	0	0	0.03	0.01	0.07	494.09	0.04	0.02	0.02	0	11.6234	0.0030295	0.355857	ODC1	PREDICTED: ornithine decarboxylase [Anas platyrhynchos]	Metabolism	Global and overview maps;Amino acid metabolism;Metabolism of other amino acids	ko01100//Metabolic pathways;ko00330//Arginine and proline metabolism;ko00480//Glutathione metabolism;ko00300//Lysine biosynthesis	K01581	GO:0044424//intracellular part;GO:0005623//cell;GO:0044444//cytoplasmic part;GO:0005737//cytoplasm;GO:0005622//intracellular;GO:0044464//cell part	GO:0016831//carboxy-lyase activity;GO:0016829//lyase activity;GO:0005515//protein binding;GO:0046983//protein dimerization activity;GO:0016830//carbon-carbon lyase activity;GO:0005488//binding;GO:0003824//catalytic activity	GO:0009308//amine metabolic process;GO:0009605//response to external stimulus;GO:0008152//metabolic process;GO:0050794//regulation of cellular process;GO:0050896//response to stimulus;GO:0042127//regulation of cell proliferation;GO:0044237//cellular metabolic process;GO:0065007//biological regulation;GO:0006595//polyamine metabolic process;GO:1901564//organonitrogen compound metabolic process;GO:…
XM_027455352.1	34.43	31.01	16.65	18.49	102.06	35.42	59.78	46.83	4696.05	2298.42	2076.67	2248.42	7241.52	6093.24	7091.09	6773.34	-1.27907	0.00136825	0.00106209	Adgrf5	PREDICTED: probable G-protein coupled receptor 116 isoform X1 [Anas platyrhynchos]	-	-	-	-	GO:0005623//cell;GO:0031224//intrinsic component of membrane;GO:0016020//membrane;GO:0044425//membrane part;GO:0044464//cell part;GO:0043226//organelle;GO:0031982//vesicle	GO:0099600//transmembrane receptor activity;GO:0004888//transmembrane signaling receptor activity;GO:0038023//signaling receptor activity;GO:0060089//molecular transducer activity;GO:0004872//receptor activity;GO:0004871//signal transducer activity	GO:0007165//signal transduction;GO:0048878//chemical homeostasis;GO:0023052//signaling;GO:0007154//cell communication;GO:0015980//energy derivation by oxidation of organic compounds;GO:0044710//single-organism metabolic process;GO:0044237//cellular metabolic process;GO:0030154//cell differentiation;GO:0033500//carbohydrate homeostasis;GO:0050789//regulation of biological process;GO:0048869//cellu…
XM_027455551.1	0	0	0	0	0.17	0.18	0.35	0.41	0	0	0	0	8.43	22.02	28.96	40.87	-8.11634	0.00138378	0.0100903	PLCB4	PREDICTED: 1-phosphatidylinositol 4,5-bisphosphate phosphodiesterase beta-4 isoform X2 [Anas platyrhynchos]	Environmental Information Processing;Cellular Processes;Organismal Systems;Metabolism;Human Diseases	Immune system;Excretory system;Global and overview maps;Endocrine and metabolic diseases;Circulatory system;Nervous system;Environmental adaptation;Sensory system;Neurodegenerative diseases;Cellular community - eukaryotes;Carbohydrate metabolism;Infectious diseases;Signal transduction;Digestive system;Endocrine system;Cancers	ko01100//Metabolic pathways;ko05200//Pathways in cancer;ko04020//Calcium signaling pathway;ko04015//Rap1 signaling pathway;ko04022//cGMP - PKG signaling pathway;ko04921//Oxytocin signaling pathway;ko04270//Vascular smooth muscle contraction;ko04261//Adrenergic signaling in cardiomyocytes;ko04934//Cushing syndrome;ko04072//Phospholipase D signaling pathway;ko04310//Wnt signaling pathway;ko05163//H…	K05858	-	-	-
XM_027455593.1	0	0	0	0	0.46	0.4	4.48	0	0	0	0	0	18.09	38.6	296.55	0	-10.3826	0.000323686	0.25308	PDLIM5	PREDICTED: PDZ and LIM domain protein 5 [Anser cygnoides domesticus]	-	-	-	-	GO:0044449//contractile fiber part;GO:0043226//organelle;GO:0044444//cytoplasmic part;GO:0031674//I band;GO:0043228//non-membrane-bounded organelle;GO:0030017//sarcomere;GO:0030016//myofibril;GO:0005623//cell;GO:0043292//contractile fiber;GO:0043229//intracellular organelle;GO:0005622//intracellular;GO:0043232//intracellular non-membrane-bounded organelle;GO:0044422//organelle part;GO:0005856//cy…	GO:0043167//ion binding;GO:0005488//binding;GO:0043169//cation binding	-
XM_027455740.1	0	0	0	0	0	0	2.13	3.13	0	0.14	0	0	0	0	116.72	209.2	-10.3608	0.00182214	0.15923	IMMT	PREDICTED: MICOS complex subunit MIC60 [Anser cygnoides domesticus]	-	-	-	-	GO:0043231//intracellular membrane-bounded organelle;GO:0044424//intracellular part;GO:0044464//cell part;GO:0043227//membrane-bounded organelle;GO:0005622//intracellular;GO:0005623//cell;GO:0044425//membrane part;GO:0043229//intracellular organelle;GO:0043226//organelle;GO:0016020//membrane;GO:0031224//intrinsic component of membrane	GO:0003676//nucleic acid binding;GO:1901363//heterocyclic compound binding;GO:0003723//RNA binding;GO:0005488//binding;GO:0097159//organic cyclic compound binding	GO:0098771//inorganic ion homeostasis;GO:0055074//calcium ion homeostasis;GO:0030003//cellular cation homeostasis;GO:0006875//cellular metal ion homeostasis;GO:0006873//cellular ion homeostasis;GO:0044763//single-organism cellular process;GO:0055080//cation homeostasis;GO:0048878//chemical homeostasis;GO:0019725//cellular homeostasis;GO:0072507//divalent inorganic cation homeostasis;GO:0055082//c…
XM_027455786.1	0.44	1.1	0	1.33	0	0	0	0	47.56	64.21	0	128.27	0	0	0	0	9.48684	0.000433794	0.0642221	ALPK1	PREDICTED: alpha-protein kinase 1 [Anas platyrhynchos]	-	-	-	-	-	GO:0001882//nucleoside binding;GO:1901363//heterocyclic compound binding;GO:0032549//ribonucleoside binding;GO:0005488//binding;GO:0097159//organic cyclic compound binding;GO:0097367//carbohydrate derivative binding;GO:0032550//purine ribonucleoside binding;GO:0001883//purine nucleoside binding;GO:0036094//small molecule binding;GO:0016740//transferase activity;GO:0003824//catalytic activity	GO:0044267//cellular protein metabolic process;GO:0043412//macromolecule modification;GO:0008152//metabolic process;GO:0044260//cellular macromolecule metabolic process;GO:0043170//macromolecule metabolic process;GO:0044237//cellular metabolic process;GO:0019538//protein metabolic process;GO:0044238//primary metabolic process;GO:0036211//protein modification process;GO:0071704//organic substance …
XM_027456019.1	0	0	0	0	0.29	0.38	0.43	0.89	0	0	0	0	11.16	35.51	28.23	70.42	-8.95855	0.000469114	0.0267503	CENPC	PREDICTED: centromere protein C [Anas platyrhynchos]	-	-	-	-	-	-	-
XM_027456068.1	13.07	8.76	10.93	8.54	2.25	6	4.06	2.93	1119.46	408.09	856.29	652.41	100.22	648.46	302.84	266.27	1.43828	0.00351076	0.0643808	Naaa	PREDICTED: N-acylethanolamine-hydrolyzing acid amidase isoform X1 [Coturnix japonica]	-	-	-	-	GO:0043231//intracellular membrane-bounded organelle;GO:0031988//membrane-bounded vesicle;GO:0043227//membrane-bounded organelle;GO:0044444//cytoplasmic part;GO:0005622//intracellular;GO:0044464//cell part;GO:0044424//intracellular part;GO:0005623//cell;GO:0005737//cytoplasm;GO:0031982//vesicle;GO:0005773//vacuole;GO:0000323//lytic vacuole;GO:0043229//intracellular organelle;GO:0043226//organelle	GO:0005488//binding;GO:0003824//catalytic activity;GO:0016787//hydrolase activity;GO:0005515//protein binding	GO:0044238//primary metabolic process;GO:0008152//metabolic process
XM_027456264.1	0	1.17	3.65	0	0	0	0	0	0	64.75	340.23	0	0	0	0	0	10.2348	0.00113189	0.258445	Sorbs2	PREDICTED: sorbin and SH3 domain-containing protein 2 isoform X6 [Aquila chrysaetos canadensis]	-	-	-	-	-	-	-
XM_027456301.1	0.03	0.04	0.03	8.57	0.07	0.02	0.04	0.01	5.4	2.96	4.23	1187.19	5.6	4.38	5.51	1.06	5.95253	0.000873982	0.355832	WWC2	PREDICTED: protein WWC2 isoform X1 [Anas platyrhynchos]	-	-	-	-	GO:0044424//intracellular part;GO:0005623//cell;GO:0044464//cell part;GO:0044444//cytoplasmic part;GO:0005622//intracellular;GO:0005737//cytoplasm	GO:0005515//protein binding;GO:0019899//enzyme binding;GO:0005488//binding	GO:0040008//regulation of growth;GO:0050789//regulation of biological process;GO:0009966//regulation of signal transduction;GO:0050794//regulation of cellular process;GO:0045926//negative regulation of growth;GO:0010646//regulation of cell communication;GO:0048583//regulation of response to stimulus;GO:0048519//negative regulation of biological process;GO:1902531//regulation of intracellular sign…
XM_027456349.1	0	0	0	0	0	0	0	5.76	0	0	0	0	0	0	0	641.71	-10.4919	0.00327323	0.355918	TMLHE	PREDICTED: LOW QUALITY PROTEIN: trimethyllysine dioxygenase, mitochondrial [Anser cygnoides domesticus]	Metabolism	Amino acid metabolism	ko00310//Lysine degradation	K00474	GO:0005622//intracellular;GO:0044424//intracellular part;GO:0044464//cell part;GO:0005623//cell;GO:0043229//intracellular organelle;GO:0043231//intracellular membrane-bounded organelle;GO:0043227//membrane-bounded organelle;GO:0043226//organelle	GO:0051213//dioxygenase activity;GO:0016706//oxidoreductase activity, acting on paired donors, with incorporation or reduction of molecular oxygen, 2-oxoglutarate as one donor, and incorporation of one atom each of oxygen into both donors;GO:0016705//oxidoreductase activity, acting on paired donors, with incorporation or reduction of molecular oxygen;GO:0016701//oxidoreductase activity, acting on…	GO:0050790//regulation of catalytic activity;GO:0009892//negative regulation of metabolic process;GO:0044271//cellular nitrogen compound biosynthetic process;GO:0071704//organic substance metabolic process;GO:0048519//negative regulation of biological process;GO:1901564//organonitrogen compound metabolic process;GO:0044249//cellular biosynthetic process;GO:0044237//cellular metabolic process;GO:0…
XM_027456425.1	0.05	3.48	0	0	0	0	0	0	6.21	248.66	0.08	0	0	0	0	0	9.78545	0.00219966	0.341119	NEK1	PREDICTED: serine/threonine-protein kinase Nek1 isoform X6 [Anas platyrhynchos]	-	-	-	-	-	-	-
XM_027456456.1	447.89	142.06	206.25	233.96	142.56	91.21	67.8	50.77	45228.2	7797.45	19051.8	21064.6	7489.15	11618.4	5954.4	5437.69	1.54783	0.000225828	0.0979819	CPE	PREDICTED: carboxypeptidase E [Calidris pugnax]	Human Diseases	Endocrine and metabolic diseases	ko04940//Type I diabetes mellitus	K01294	GO:0043226//organelle;GO:0042995//cell projection;GO:0005622//intracellular;GO:0044422//organelle part;GO:0044456//synapse part;GO:0043229//intracellular organelle;GO:0044424//intracellular part;GO:0099503//secretory vesicle;GO:0030141//secretory granule;GO:0044421//extracellular region part;GO:0044464//cell part;GO:0043231//intracellular membrane-bounded organelle;GO:0044444//cytoplasmic part;GO…	GO:0008233//peptidase activity;GO:0070011//peptidase activity, acting on L-amino acid peptides;GO:0008235//metalloexopeptidase activity;GO:0008238//exopeptidase activity;GO:0005102//receptor binding;GO:0016787//hydrolase activity;GO:0046872//metal ion binding;GO:0005515//protein binding;GO:0005488//binding;GO:0046914//transition metal ion binding;GO:0003824//catalytic activity;GO:0008237//metallo…	GO:0007399//nervous system development;GO:0050789//regulation of biological process;GO:0034641//cellular nitrogen compound metabolic process;GO:0048856//anatomical structure development;GO:0050794//regulation of cellular process;GO:0051716//cellular response to stimulus;GO:0023052//signaling;GO:0007165//signal transduction;GO:0016486//peptide hormone processing;GO:0044238//primary metabolic proce…
XM_027456858.1	0	0	0	0	2.95	1.25	2.6	4.42	0	0	0	0	38.37	39.48	56.48	117.26	-11.4538	2.62e-05	0.0147909	CETN1	Centrin-1, partial [Anas platyrhynchos]	-	-	-	-	-	-	-
XM_027456895.1	2.14	2.13	1.84	1.94	3.35	3.17	3.21	16.83	413.95	224.06	326.16	334.3	337.05	774.33	540.32	3455.81	-1.72219	0.00290933	0.241483	USP53	PREDICTED: inactive ubiquitin carboxyl-terminal hydrolase 53 [Anas platyrhynchos]	-	-	-	-	-	GO:0003824//catalytic activity;GO:0016787//hydrolase activity	-
XM_027457027.1	0	2.34	0	0	0	0	0	0	0	254.47	0.13	0	0	0	0	0	9.19229	0.00559767	0.355614	ANKRD17	PREDICTED: ankyrin repeat domain-containing protein 17 isoform X4 [Anas platyrhynchos]	-	-	-	-	GO:0044464//cell part;GO:0043231//intracellular membrane-bounded organelle;GO:0043226//organelle;GO:0043227//membrane-bounded organelle;GO:0043229//intracellular organelle;GO:0005622//intracellular;GO:0005623//cell;GO:0044424//intracellular part	GO:0003676//nucleic acid binding;GO:0005488//binding;GO:0003723//RNA binding;GO:1901363//heterocyclic compound binding;GO:0097159//organic cyclic compound binding	GO:0050794//regulation of cellular process;GO:0045595//regulation of cell differentiation;GO:0048519//negative regulation of biological process;GO:0051148//negative regulation of muscle cell differentiation;GO:0051147//regulation of muscle cell differentiation;GO:0050793//regulation of developmental process;GO:0050789//regulation of biological process;GO:0048523//negative regulation of cellular p…
XM_027457099.1	2.93	4.05	0.2	0	0	0	0	0	215.04	161.48	13.62	0	0	0	0	0	10.8098	0.000118014	0.118567	DCUN1D4	PREDICTED: DCN1-like protein 4 isoform X2 [Aquila chrysaetos canadensis]	-	-	-	-	-	-	-
XM_027457306.1	0.38	0	0	1.33	0	0	0	0	37.95	0	0	117.8	0	0	0	0	8.73978	0.00950603	0.210399	Dnajb9	PREDICTED: dnaJ homolog subfamily B member 9 [Anas platyrhynchos]	-	-	-	-	GO:0043226//organelle;GO:0031982//vesicle;GO:0031988//membrane-bounded vesicle;GO:0043227//membrane-bounded organelle	GO:0005488//binding;GO:0005515//protein binding	GO:0044260//cellular macromolecule metabolic process;GO:0044267//cellular protein metabolic process;GO:0043170//macromolecule metabolic process;GO:0006511//ubiquitin-dependent protein catabolic process;GO:0044257//cellular protein catabolic process;GO:0043632//modification-dependent macromolecule catabolic process;GO:0008152//metabolic process;GO:0071704//organic substance metabolic process;GO:00…
XM_027457426.1	0	0	0	0	0	5.88	0	2.41	0	0	0	0	0	590.35	0	203.59	-11.0172	0.0003396	0.203666	MAN2B2	PREDICTED: epididymis-specific alpha-mannosidase isoform X1 [Anas platyrhynchos]	Metabolism	Glycan biosynthesis and metabolism	ko00511//Other glycan degradation	K12312	GO:0031988//membrane-bounded vesicle;GO:0043227//membrane-bounded organelle;GO:0031982//vesicle;GO:0043226//organelle	GO:0046914//transition metal ion binding;GO:0004553//hydrolase activity, hydrolyzing O-glycosyl compounds;GO:0016787//hydrolase activity;GO:0046872//metal ion binding;GO:0043167//ion binding;GO:0015923//mannosidase activity;GO:0043169//cation binding;GO:0003824//catalytic activity;GO:0016798//hydrolase activity, acting on glycosyl bonds;GO:0005488//binding	GO:0005975//carbohydrate metabolic process;GO:0044238//primary metabolic process;GO:0044723//single-organism carbohydrate metabolic process;GO:0019318//hexose metabolic process;GO:0044710//single-organism metabolic process;GO:0044281//small molecule metabolic process;GO:0071704//organic substance metabolic process;GO:0008152//metabolic process;GO:0044699//single-organism process;GO:0005996//monos…
XM_027457444.1	13.74	9.86	12.69	22.33	4.72	3.45	2.6	1.85	1631.08	635.84	1377.26	2363.05	291.25	515.93	268.52	232.87	2.21568	1.39e-06	0.0175911	SORCS2	PREDICTED: VPS10 domain-containing receptor SorCS2 [Zonotrichia albicollis]	-	-	-	-	GO:0031224//intrinsic component of membrane;GO:0044425//membrane part;GO:0016020//membrane	-	-
XM_027457471.1	3562.52	3214.14	1772.47	3438.48	4448.35	6502.95	6797.31	11100.1	476394	233621	216817	409967	309468	1.09697e+06	790576	1574368	-1.26696	0.000459256	0.067596	Pnpla2	patatin-like phospholipase domain-containing protein 2 [Anas platyrhynchos]	Metabolism;Organismal Systems	Environmental adaptation;Endocrine system;Lipid metabolism;Global and overview maps	ko01100//Metabolic pathways;ko04714//Thermogenesis;ko00561//Glycerolipid metabolism;ko04923//Regulation of lipolysis in adipocyte	K16816	GO:0044444//cytoplasmic part;GO:0043227//membrane-bounded organelle;GO:0044464//cell part;GO:0043232//intracellular non-membrane-bounded organelle;GO:0005623//cell;GO:0043229//intracellular organelle;GO:0043228//non-membrane-bounded organelle;GO:0043226//organelle;GO:0044424//intracellular part;GO:0005622//intracellular;GO:0005737//cytoplasm	-	GO:0019216//regulation of lipid metabolic process;GO:0050994//regulation of lipid catabolic process;GO:0065008//regulation of biological quality;GO:0032879//regulation of localization;GO:0080090//regulation of primary metabolic process;GO:0048519//negative regulation of biological process;GO:0010883//regulation of lipid storage;GO:0010888//negative regulation of lipid storage;GO:0050789//regulati…
XM_027457642.1	0	0	0.13	0.65	0	0	0	0	0	0	27.69	135.55	0	0	0	0	7.60733	0.00863333	0.252603	Traf3	PREDICTED: TNF receptor-associated factor 3 isoform X1 [Anas platyrhynchos]	Human Diseases;Organismal Systems;Environmental Information Processing	Infectious diseases;Cancers;Signal transduction;Immune system	ko05200//Pathways in cancer;ko05165//Human papillomavirus infection;ko05169//Epstein-Barr virus infection;ko05203//Viral carcinogenesis;ko05167//Kaposi sarcoma-associated herpesvirus infection;ko05168//Herpes simplex infection;ko04621//NOD-like receptor signaling pathway;ko04668//TNF signaling pathway;ko05160//Hepatitis C;ko04064//NF-kappa B signaling pathway;ko05222//Small cell lung cancer;ko046…	K03174	GO:0032991//macromolecular complex;GO:0071944//cell periphery;GO:0005623//cell;GO:0043235//receptor complex;GO:0005886//plasma membrane;GO:0016020//membrane;GO:0044464//cell part;GO:0043234//protein complex	GO:0032813//tumor necrosis factor receptor superfamily binding;GO:0005515//protein binding;GO:0046872//metal ion binding;GO:0005126//cytokine receptor binding;GO:0044389//ubiquitin-like protein ligase binding;GO:0019899//enzyme binding;GO:0043167//ion binding;GO:0005102//receptor binding;GO:0043169//cation binding;GO:0046914//transition metal ion binding;GO:0016740//transferase activity;GO:000382…	GO:0002218//activation of innate immune response;GO:0065007//biological regulation;GO:0031349//positive regulation of defense response;GO:0080090//regulation of primary metabolic process;GO:1903507//negative regulation of nucleic acid-templated transcription;GO:0048518//positive regulation of biological process;GO:0070647//protein modification by small protein conjugation or removal;GO:0048583//r…
XM_027457666.1	3.64	1.95	3.21	2.64	6.78	8.21	5.75	7.9	579.29	168.4	467.39	374.13	560.76	1645.5	794.58	1331.12	-1.32394	0.00166121	0.0398343	MET	PREDICTED: hepatocyte growth factor receptor [Anas platyrhynchos]	Organismal Systems;Human Diseases;Cellular Processes;Environmental Information Processing	Infectious diseases;Drug resistance;Cancers;Development;Cellular community - eukaryotes;Signal transduction	ko05200//Pathways in cancer;ko04010//MAPK signaling pathway;ko04151//PI3K-Akt signaling pathway;ko05205//Proteoglycans in cancer;ko04014//Ras signaling pathway;ko04015//Rap1 signaling pathway;ko04510//Focal adhesion;ko04360//Axon guidance;ko05202//Transcriptional misregulation in cancers;ko05206//MicroRNAs in cancer;ko04520//Adherens junction;ko05225//Hepatocellular carcinoma;ko05226//Gastric can…	K05099	GO:0044464//cell part;GO:0044425//membrane part;GO:0031224//intrinsic component of membrane;GO:0016020//membrane;GO:0005623//cell	GO:0004714//transmembrane receptor protein tyrosine kinase activity;GO:0016773//phosphotransferase activity, alcohol group as acceptor;GO:0016301//kinase activity;GO:0097367//carbohydrate derivative binding;GO:0005488//binding;GO:0032549//ribonucleoside binding;GO:0032550//purine ribonucleoside binding;GO:0005515//protein binding;GO:0001882//nucleoside binding;GO:0019902//phosphatase binding;GO:0…	GO:0051247//positive regulation of protein metabolic process;GO:0007399//nervous system development;GO:0065009//regulation of molecular function;GO:0003382//epithelial cell morphogenesis;GO:0030154//cell differentiation;GO:0032502//developmental process;GO:0031326//regulation of cellular biosynthetic process;GO:0080090//regulation of primary metabolic process;GO:0010595//positive regulation of en…
XM_027457747.1	52.18	32.79	80.31	62.65	22.22	16.47	40.16	23.75	3580.18	1222.91	5040.17	3832.62	792.97	1425.72	2396.54	1728.58	1.15156	0.00372261	0.0783974	Pygl	PREDICTED: glycogen phosphorylase, liver form [Columba livia]	Cellular Processes;Human Diseases;Metabolism;Organismal Systems	Cell growth and death;Carbohydrate metabolism;Endocrine system;Global and overview maps;Endocrine and metabolic diseases	ko01100//Metabolic pathways;ko04217//Necroptosis;ko04910//Insulin signaling pathway;ko04922//Glucagon signaling pathway;ko04931//Insulin resistance;ko00500//Starch and sucrose metabolism	K00688	GO:0005622//intracellular;GO:0005623//cell;GO:0031988//membrane-bounded vesicle;GO:0016020//membrane;GO:0044424//intracellular part;GO:0043227//membrane-bounded organelle;GO:0044464//cell part;GO:0031982//vesicle;GO:0043226//organelle	GO:0016758//transferase activity, transferring hexosyl groups;GO:0032550//purine ribonucleoside binding;GO:0097159//organic cyclic compound binding;GO:0004645//phosphorylase activity;GO:0003824//catalytic activity;GO:0036094//small molecule binding;GO:0005488//binding;GO:0001882//nucleoside binding;GO:0043168//anion binding;GO:1901363//heterocyclic compound binding;GO:0097367//carbohydrate deriva…	GO:0044699//single-organism process;GO:0016265//death;GO:0065007//biological regulation;GO:0012501//programmed cell death;GO:0042592//homeostatic process;GO:0065008//regulation of biological quality;GO:0006073//cellular glucan metabolic process;GO:0044260//cellular macromolecule metabolic process;GO:0008152//metabolic process;GO:0097300//programmed necrotic cell death;GO:0008219//cell death;GO:00…
XM_027457786.1	6.38	7.6	13.04	7.18	14.98	16.14	19.4	24.25	1674.68	1083.28	3129.82	1679.86	2044.54	5341.22	4427.26	6748.06	-1.12846	0.00146346	0.0437922	SLC1A2	PREDICTED: excitatory amino acid transporter 2 isoform X1 [Anas platyrhynchos]	Human Diseases;Organismal Systems	Nervous system;Neurodegenerative diseases	ko04724//Glutamatergic synapse;ko05014//Amyotrophic lateral sclerosis (ALS)	K05613	-	-	-
XM_027457825.1	12.82	11.09	13.84	13.02	7.12	5.12	6.03	4.56	955	449	943	865	276	481	391	360	1.15305	0.0066164	0.0153069	MPEG1	PREDICTED: macrophage-expressed gene 1 protein [Anser cygnoides domesticus]	-	-	-	-	-	-	-
XM_027457853.1	10.77	5.8	5.91	18.57	2.73	4.22	1.85	1.28	603.22	176.59	302.98	927.11	79.56	298.02	90	75.94	2.02589	0.00265571	0.0823721	SCG5	PREDICTED: neuroendocrine protein 7B2 isoform X1 [Anas platyrhynchos]	-	-	-	-	GO:0044464//cell part;GO:0012505//endomembrane system;GO:0005623//cell	GO:0005515//protein binding;GO:0005488//binding	GO:0009987//cellular process;GO:0050896//response to stimulus;GO:0015031//protein transport;GO:0006810//transport;GO:0009892//negative regulation of metabolic process;GO:0051716//cellular response to stimulus;GO:0044700//single organism signaling;GO:0044763//single-organism cellular process;GO:0007186//G-protein coupled receptor signaling pathway;GO:0051179//localization;GO:0016485//protein proce…
XM_027457854.1	26.77	23.85	15.97	38.78	13.11	5.82	5.75	5	2784.07	1347.71	1518.95	3595.7	708.99	763.02	520.05	551.41	1.8279	3.37e-05	0.0207021	GREM1	PREDICTED: gremlin-1 [Anas platyrhynchos]	-	-	-	-	GO:0044421//extracellular region part;GO:0044464//cell part;GO:0005623//cell;GO:0005576//extracellular region	GO:0030234//enzyme regulator activity;GO:0005102//receptor binding;GO:0098772//molecular function regulator;GO:0005172//vascular endothelial growth factor receptor binding;GO:0070851//growth factor receptor binding;GO:0005515//protein binding;GO:0019209//kinase activator activity;GO:0005126//cytokine receptor binding;GO:0019887//protein kinase regulator activity;GO:0008047//enzyme activator activ…	GO:0001838//embryonic epithelial tube formation;GO:0032269//negative regulation of cellular protein metabolic process;GO:0034104//negative regulation of tissue remodeling;GO:0019219//regulation of nucleobase-containing compound metabolic process;GO:0051147//regulation of muscle cell differentiation;GO:0042990//regulation of transcription factor import into nucleus;GO:0034103//regulation of tissue…
XM_027457943.1	0	0	0	0	0.68	0.6	0	0.83	0	0	0	0	37.07	79.85	0	91.88	-9.04303	0.0011104	0.0474485	RBM25	PREDICTED: RNA-binding protein 25 isoform X1 [Anas platyrhynchos]	Genetic Information Processing	Transcription	ko03040//Spliceosome	K12822	GO:0043231//intracellular membrane-bounded organelle;GO:0031981//nuclear lumen;GO:0016604//nuclear body;GO:0044428//nuclear part;GO:0005622//intracellular;GO:0031974//membrane-enclosed lumen;GO:0043226//organelle;GO:0005654//nucleoplasm;GO:0070013//intracellular organelle lumen;GO:0005634//nucleus;GO:0044446//intracellular organelle part;GO:0043229//intracellular organelle;GO:0044424//intracellul…	GO:0003676//nucleic acid binding;GO:0044822//poly(A) RNA binding;GO:1901363//heterocyclic compound binding;GO:0003723//RNA binding;GO:0005488//binding;GO:0097159//organic cyclic compound binding	GO:0044763//single-organism cellular process;GO:0043484//regulation of RNA splicing;GO:0050789//regulation of biological process;GO:0051171//regulation of nitrogen compound metabolic process;GO:0006915//apoptotic process;GO:0044699//single-organism process;GO:0008219//cell death;GO:0065007//biological regulation;GO:0031323//regulation of cellular metabolic process;GO:0050684//regulation of mRNA p…
XM_027457988.1	0	0	0	32.22	0	0	0	0	0	0	0	726.75	0	0	0	0	12.9757	0.00189565	0.355918	VTI1B	PREDICTED: vesicle transport through interaction with t-SNAREs homolog 1B [Coturnix japonica]	Genetic Information Processing	Folding, sorting and degradation	ko04130//SNARE interactions in vesicular transport	K08493	GO:0005774//vacuolar membrane;GO:0012505//endomembrane system;GO:0098588//bounding membrane of organelle;GO:0005623//cell;GO:0043229//intracellular organelle;GO:0005773//vacuole;GO:0044424//intracellular part;GO:0010008//endosome membrane;GO:0044464//cell part;GO:0044444//cytoplasmic part;GO:0005622//intracellular;GO:0005768//endosome;GO:0044440//endosomal part;GO:0016020//membrane;GO:0043227//me…	GO:0005488//binding;GO:0005515//protein binding	GO:0046907//intracellular transport;GO:0045184//establishment of protein localization;GO:0016482//cytoplasmic transport;GO:0015031//protein transport;GO:0044699//single-organism process;GO:1902582//single-organism intracellular transport;GO:0048193//Golgi vesicle transport;GO:0033036//macromolecule localization;GO:1902578//single-organism localization;GO:0051234//establishment of localization;GO:…
XM_027458004.1	0	0	0	0	0.64	0.48	0	0.24	0	0	0	0	26.72	48.15	0	20.16	-8.40939	0.00716885	0.0536848	CTTN1	PREDICTED: src substrate cortactin isoform X5 [Anser cygnoides domesticus]	Human Diseases;Cellular Processes	Cellular community - eukaryotes;Infectious diseases;Cancers	ko05205//Proteoglycans in cancer;ko04530//Tight junction;ko05100//Bacterial invasion of epithelial cells;ko05131//Shigellosis;ko05130//Pathogenic Escherichia coli infection	K06106	-	-	-
XM_027458212.1	0	0	0	0	0	0.23	0.33	0.4	0	0	0	0	0	30.04	29.83	43.78	-7.90689	0.00628763	0.0309039	TANC1	PREDICTED: protein TANC1 isoform X1 [Anas platyrhynchos]	-	-	-	-	GO:0005623//cell;GO:0042995//cell projection;GO:0044464//cell part;GO:0044463//cell projection part;GO:0033267//axon part;GO:0030424//axon;GO:0044297//cell body;GO:0097458//neuron part;GO:0043005//neuron projection	-	GO:0044763//single-organism cellular process;GO:0043954//cellular component maintenance;GO:0016043//cellular component organization;GO:0044699//single-organism process;GO:0044708//single-organism behavior;GO:0007610//behavior;GO:0009416//response to light stimulus;GO:0009628//response to abiotic stimulus;GO:0009314//response to radiation;GO:0071840//cellular component organization or biogenesis;G…
XM_027458253.1	0	0	0	0	0	2.24	3.48	0	0	0	0	0	0	440.28	471.14	0	-10.4818	0.000128225	0.134342	CIPC	PREDICTED: CLOCK-interacting pacemaker [Anas platyrhynchos]	-	-	-	-	-	-	-
XM_027458265.1	0	0.04	0	0	0	2.27	0	1.82	0	2.72	0	0	0	401.53	0	270.54	-6.67596	0.00690881	0.147376	PTPRJ	PREDICTED: receptor-type tyrosine-protein phosphatase eta [Mesitornis unicolor]	Cellular Processes	Cellular community - eukaryotes	ko04520//Adherens junction	K05698	GO:0016020//membrane;GO:0044459//plasma membrane part;GO:0044425//membrane part;GO:0071944//cell periphery;GO:0030054//cell junction;GO:0005623//cell;GO:0005886//plasma membrane;GO:0044464//cell part;GO:0042995//cell projection	GO:0016787//hydrolase activity;GO:0005488//binding;GO:0042578//phosphoric ester hydrolase activity;GO:0019899//enzyme binding;GO:0003824//catalytic activity;GO:0016788//hydrolase activity, acting on ester bonds;GO:0019901//protein kinase binding;GO:0005515//protein binding;GO:0016791//phosphatase activity;GO:0019900//kinase binding	GO:0006793//phosphorus metabolic process;GO:0060255//regulation of macromolecule metabolic process;GO:0030334//regulation of cell migration;GO:0050854//regulation of antigen receptor-mediated signaling pathway;GO:0051174//regulation of phosphorus metabolic process;GO:0023057//negative regulation of signaling;GO:0009966//regulation of signal transduction;GO:0006796//phosphate-containing compound m…
XM_027458412.1	5.47	5.63	8.01	10.23	1.82	2.35	2.32	2.87	357.5	200	479	596.47	62.01	193.41	131.68	199	1.64829	0.00709079	0.0278414	CYB5R2	PREDICTED: NADH-cytochrome b5 reductase 2 [Coturnix japonica]	Metabolism	Carbohydrate metabolism	ko00520//Amino sugar and nucleotide sugar metabolism	K00326	GO:0044464//cell part;GO:0031224//intrinsic component of membrane;GO:0043231//intracellular membrane-bounded organelle;GO:0005622//intracellular;GO:0043226//organelle;GO:0016020//membrane;GO:0043229//intracellular organelle;GO:0005623//cell;GO:0044425//membrane part;GO:0043227//membrane-bounded organelle;GO:0044424//intracellular part	GO:0016653//oxidoreductase activity, acting on NAD(P)H, heme protein as acceptor;GO:0016491//oxidoreductase activity;GO:0003824//catalytic activity;GO:0016651//oxidoreductase activity, acting on NAD(P)H	GO:0008610//lipid biosynthetic process;GO:0008152//metabolic process;GO:0071704//organic substance metabolic process;GO:0044238//primary metabolic process;GO:1901362//organic cyclic compound biosynthetic process;GO:0008202//steroid metabolic process;GO:1901576//organic substance biosynthetic process;GO:0044711//single-organism biosynthetic process;GO:1901360//organic cyclic compound metabolic pro…
XM_027458524.1	0.37	0	1	1.54	0	0	0	0	23.26	0	58.15	86.93	0	0	0	0	9.5068	0.00172394	0.0701847	C11orf24	PREDICTED: uncharacterized protein C11orf24 homolog [Anas platyrhynchos]	-	-	-	-	-	-	-
XM_027458529.1	50.23	30.13	155.41	58.9	31.1	21.02	29.9	28.05	1273	415	3603	1331	410	672	659	754	1.42068	0.00395815	0.183352	LGALS3	PREDICTED: galectin-3 [Anser cygnoides domesticus]	-	-	-	-	GO:0043231//intracellular membrane-bounded organelle;GO:0071944//cell periphery;GO:0031988//membrane-bounded vesicle;GO:0044459//plasma membrane part;GO:0044425//membrane part;GO:0005622//intracellular;GO:0019866//organelle inner membrane;GO:0044421//extracellular region part;GO:0005886//plasma membrane;GO:0031975//envelope;GO:0043227//membrane-bounded organelle;GO:0031090//organelle membrane;GO:…	GO:0032403//protein complex binding;GO:1901363//heterocyclic compound binding;GO:0003676//nucleic acid binding;GO:0003723//RNA binding;GO:0019865//immunoglobulin binding;GO:0005488//binding;GO:0097159//organic cyclic compound binding;GO:0005515//protein binding;GO:0044877//macromolecular complex binding	GO:0006935//chemotaxis;GO:0051249//regulation of lymphocyte activation;GO:0042330//taxis;GO:0030335//positive regulation of cell migration;GO:2001236//regulation of extrinsic apoptotic signaling pathway;GO:0060627//regulation of vesicle-mediated transport;GO:0097530//granulocyte migration;GO:0040012//regulation of locomotion;GO:0044763//single-organism cellular process;GO:0051674//localization of…
XM_027458588.1	0.63	0.83	0	0	0	0	0	0	137.25	97.6	0	0	0	0	0	0	8.51175	0.00312085	0.143029	Cdan1	PREDICTED: codanin-1 isoform X4 [Anas platyrhynchos]	-	-	-	-	GO:0005623//cell;GO:0005622//intracellular;GO:0044464//cell part;GO:0016020//membrane;GO:0044424//intracellular part	-	GO:0050789//regulation of biological process;GO:0051171//regulation of nitrogen compound metabolic process;GO:0051276//chromosome organization;GO:0060255//regulation of macromolecule metabolic process;GO:0006996//organelle organization;GO:0019222//regulation of metabolic process;GO:0016043//cellular component organization;GO:0009987//cellular process;GO:0051179//localization;GO:0033036//macromole…
XM_027458937.1	0	0	0	0	0	0.09	0.19	0.22	0	0	0	0	0	33.34	46.33	66.08	-6.96578	0.0028981	0.0393715	NAV2	PREDICTED: neuron navigator 2 isoform X1 [Haliaeetus leucocephalus]	-	-	-	-	GO:0044424//intracellular part;GO:0043227//membrane-bounded organelle;GO:0043229//intracellular organelle;GO:0043231//intracellular membrane-bounded organelle;GO:0005578//proteinaceous extracellular matrix;GO:0005576//extracellular region;GO:0005622//intracellular;GO:0044464//cell part;GO:0044421//extracellular region part;GO:0031012//extracellular matrix;GO:0005623//cell;GO:0043226//organelle	GO:0001882//nucleoside binding;GO:0097367//carbohydrate derivative binding;GO:0001883//purine nucleoside binding;GO:0032550//purine ribonucleoside binding;GO:0032549//ribonucleoside binding;GO:1901363//heterocyclic compound binding;GO:0005488//binding;GO:0097159//organic cyclic compound binding;GO:0005539//glycosaminoglycan binding;GO:0036094//small molecule binding	GO:0007399//nervous system development;GO:0007610//behavior;GO:0044699//single-organism process;GO:0032501//multicellular organismal process;GO:0007606//sensory perception of chemical stimulus;GO:0050954//sensory perception of mechanical stimulus;GO:0003008//system process;GO:0021675//nerve development;GO:0044767//single-organism developmental process;GO:0050877//neurological system process;GO:00…
XM_027458967.1	5.34	0	0	4.26	0	0	0	0	868.1	0	0	616.44	0	0.18	0	0	11.2288	2.18e-05	0.143143	QSER1	PREDICTED: glutamine and serine-rich protein 1 [Anas platyrhynchos]	-	-	-	-	-	-	-
XM_027458969.1	0.3	5.73	0	0	0	0	0	0	49.53	505.74	0	0	0	0	0	0	10.5579	0.000254074	0.301674	QSER1	PREDICTED: glutamine and serine-rich protein 1 [Anas platyrhynchos]	-	-	-	-	-	-	-
XM_027458974.1	0	0	0	0	0.86	0	0.97	0.42	0	0	0	0	36.52	0	69.19	36.67	-9.13571	0.00204351	0.0453982	ERGIC2	PREDICTED: endoplasmic reticulum-Golgi intermediate compartment protein 2 [Anas platyrhynchos]	-	-	-	-	-	-	-
XM_027459310.1	0	0	0	0	1.06	0.44	0	0.52	0	0	0	0	101.48	102.55	0	102.28	-8.98014	0.000212994	0.0240119	TMEM86A	PREDICTED: lysoplasmalogenase-like protein TMEM86A [Anas platyrhynchos]	-	-	-	-	-	-	-
XM_027459324.1	0	0	0	0	0.31	0	0.1	0.07	0	0	0	0	47.92	0	26.27	23.97	-6.90689	0.00416014	0.0462499	FLRT2	PREDICTED: leucine-rich repeat transmembrane protein FLRT2 [Anas platyrhynchos]	-	-	-	-	GO:0005912//adherens junction;GO:0044425//membrane part;GO:0005924//cell-substrate adherens junction;GO:0043227//membrane-bounded organelle;GO:0030055//cell-substrate junction;GO:0043226//organelle;GO:0031988//membrane-bounded vesicle;GO:0030054//cell junction;GO:0016020//membrane;GO:0031982//vesicle;GO:0031224//intrinsic component of membrane;GO:0070161//anchoring junction	-	GO:0009653//anatomical structure morphogenesis;GO:0042221//response to chemical;GO:0009987//cellular process;GO:0032502//developmental process;GO:0032501//multicellular organismal process;GO:0001764//neuron migration;GO:0030030//cell projection organization;GO:0016043//cellular component organization;GO:0030154//cell differentiation;GO:0016477//cell migration;GO:0048731//system development;GO:004…
XM_027459514.1	0.8	0	1.07	0	0	0	0	0	82.84	0	101.44	0	0	0	0	0	8.86882	0.0069132	0.137231	Snap23	PREDICTED: synaptosomal-associated protein 23 [Anas platyrhynchos]	Organismal Systems;Genetic Information Processing	Folding, sorting and degradation;Immune system	ko04611//Platelet activation;ko04130//SNARE interactions in vesicular transport	K08508	GO:0016020//membrane;GO:0043227//membrane-bounded organelle;GO:0012505//endomembrane system;GO:0005764//lysosome;GO:0099503//secretory vesicle;GO:0005924//cell-substrate adherens junction;GO:0005623//cell;GO:0030055//cell-substrate junction;GO:0031988//membrane-bounded vesicle;GO:0044444//cytoplasmic part;GO:0005766//primary lysosome;GO:0031982//vesicle;GO:0044464//cell part;GO:0030054//cell junc…	-	GO:0016192//vesicle-mediated transport;GO:0051234//establishment of localization;GO:0006810//transport;GO:0051179//localization
XM_027459593.1	0.98	0	0.41	0	0	0	0	0	114	0	43.92	0	0	0	0	0	8.44087	0.00992238	0.192725	BUB1B	PREDICTED: mitotic checkpoint serine/threonine-protein kinase BUB1 beta [Anas platyrhynchos]	Cellular Processes;Human Diseases	Cell growth and death;Infectious diseases	ko05166//HTLV-I infection;ko04110//Cell cycle	K06637	-	-	-
XM_027459639.1	1.62	1.11	0.5	0.02	4.32	4.88	3.2	2.49	300.07	111.37	84.6	3.41	416.01	1140.02	515.29	488.5	-2.19583	0.0096257	0.0283462	ITPK1	PREDICTED: inositol-tetrakisphosphate 1-kinase isoform X3 [Anas platyrhynchos]	Metabolism;Environmental Information Processing	Global and overview maps;Carbohydrate metabolism;Signal transduction	ko01100//Metabolic pathways;ko04070//Phosphatidylinositol signaling system;ko00562//Inositol phosphate metabolism	K00913	GO:0005623//cell;GO:0044464//cell part	GO:0032549//ribonucleoside binding;GO:0043169//cation binding;GO:0001883//purine nucleoside binding;GO:0016740//transferase activity;GO:0001882//nucleoside binding;GO:0051765//inositol tetrakisphosphate kinase activity;GO:0016301//kinase activity;GO:0097159//organic cyclic compound binding;GO:0003824//catalytic activity;GO:0005488//binding;GO:0051766//inositol trisphosphate kinase activity;GO:003…	GO:0009987//cellular process;GO:0006066//alcohol metabolic process;GO:0044237//cellular metabolic process;GO:0006796//phosphate-containing compound metabolic process;GO:0043647//inositol phosphate metabolic process;GO:1901615//organic hydroxy compound metabolic process;GO:0019751//polyol metabolic process;GO:0006793//phosphorus metabolic process;GO:0044710//single-organism metabolic process;GO:00…
XM_027459724.1	0	1.55	0	0.04	0	0	0	0.01	0	249.59	0	9.54	0.45	0	0	1.63	7.31288	0.00575236	0.337367	PCNX1	PREDICTED: pecanex-like protein 1 isoform X1 [Anser cygnoides domesticus]	-	-	-	-	-	-	-
XM_027459859.1	0	0	0	0	1.22	0.15	0.69	0.44	0	0	0	0	28.61	8.33	26.95	21	-9.28771	0.00169995	0.00363023	TSPAN15	PREDICTED: tetraspanin-15 isoform X4 [Anas platyrhynchos]	-	-	-	-	GO:0043227//membrane-bounded organelle;GO:0031982//vesicle;GO:0043226//organelle;GO:0005623//cell;GO:0071944//cell periphery;GO:0005886//plasma membrane;GO:0016020//membrane;GO:0044425//membrane part;GO:0031988//membrane-bounded vesicle;GO:0031224//intrinsic component of membrane;GO:0044459//plasma membrane part;GO:0044464//cell part	GO:0005515//protein binding;GO:0005488//binding	GO:0044763//single-organism cellular process;GO:0044699//single-organism process;GO:0045184//establishment of protein localization;GO:0071704//organic substance metabolic process;GO:0051179//localization;GO:0071840//cellular component organization or biogenesis;GO:0016043//cellular component organization;GO:0008104//protein localization;GO:0043170//macromolecule metabolic process;GO:1902578//sing…
XM_027459968.1	0.6	0.37	0	0.07	0	0	0	0	60.5	20.1	0	6.27	0	0	0	0	8.02237	0.00924122	0.161204	FGFR2	PREDICTED: fibroblast growth factor receptor 2 isoform X1 [Anas platyrhynchos]	Human Diseases;Environmental Information Processing;Cellular Processes	Signal transduction;Cellular community - eukaryotes;Cell motility;Transport and catabolism;Drug resistance;Cancers	ko05200//Pathways in cancer;ko04010//MAPK signaling pathway;ko04151//PI3K-Akt signaling pathway;ko04144//Endocytosis;ko04810//Regulation of actin cytoskeleton;ko04014//Ras signaling pathway;ko04015//Rap1 signaling pathway;ko05226//Gastric cancer;ko04550//Signaling pathways regulating pluripotency of stem cells;ko05215//Prostate cancer;ko01521//EGFR tyrosine kinase inhibitor resistance;ko05230//Ce…	K05093	GO:0044424//intracellular part;GO:0043231//intracellular membrane-bounded organelle;GO:0016021//integral component of membrane;GO:0031224//intrinsic component of membrane;GO:0043229//intracellular organelle;GO:0044464//cell part;GO:0044444//cytoplasmic part;GO:0044425//membrane part;GO:0005737//cytoplasm;GO:0043226//organelle;GO:0005622//intracellular;GO:0016020//membrane;GO:0043227//membrane-bou…	GO:0032550//purine ribonucleoside binding;GO:0004672//protein kinase activity;GO:0005515//protein binding;GO:0001882//nucleoside binding;GO:0004872//receptor activity;GO:0016773//phosphotransferase activity, alcohol group as acceptor;GO:0004714//transmembrane receptor protein tyrosine kinase activity;GO:0019838//growth factor binding;GO:0004871//signal transducer activity;GO:0001883//purine nucle…	GO:0023056//positive regulation of signaling;GO:0030177//positive regulation of Wnt signaling pathway;GO:0051179//localization;GO:0035295//tube development;GO:0048598//embryonic morphogenesis;GO:0048518//positive regulation of biological process;GO:0061138//morphogenesis of a branching epithelium;GO:0050808//synapse organization;GO:0072359//circulatory system development;GO:2000112//regulation of…
XM_027460006.1	0.14	0.84	0.15	0	0	0	0	0	15.33	51.68	15.33	0	0	0	0	0	8.14211	0.00649403	0.109865	GPRIN2	PREDICTED: G protein-regulated inducer of neurite outgrowth 2 isoform X1 [Anas platyrhynchos]	-	-	-	-	-	-	-
XM_027460072.1	0	0	6.03	0	0	0	0	0	0	0	833.12	0	0	0	0	0	10.5579	0.0015358	0.355918	IPMK	PREDICTED: inositol polyphosphate multikinase [Anas platyrhynchos]	Environmental Information Processing;Metabolism	Global and overview maps;Carbohydrate metabolism;Signal transduction	ko01100//Metabolic pathways;ko04070//Phosphatidylinositol signaling system;ko00562//Inositol phosphate metabolism	K00915	-	-	-
XM_027460089.1	2934.33	1480.85	2287.41	1733.92	1185.55	145.8	214.18	38.04	343919	94340	245242	181196	72289	21557	21833	4729	2.41347	0.000635858	0.0143737	Scd1	SCD1 [Anas platyrhynchos]	Organismal Systems;Metabolism;Environmental Information Processing	Global and overview maps;Lipid metabolism;Endocrine system;Signal transduction	ko04152//AMPK signaling pathway;ko03320//PPAR signaling pathway;ko01212//Fatty acid metabolism;ko01040//Biosynthesis of unsaturated fatty acids	K00507	GO:0043231//intracellular membrane-bounded organelle;GO:0044464//cell part;GO:0044424//intracellular part;GO:0043226//organelle;GO:0043227//membrane-bounded organelle;GO:0043229//intracellular organelle;GO:0016020//membrane;GO:0005622//intracellular;GO:0031224//intrinsic component of membrane;GO:0044425//membrane part;GO:0005623//cell	GO:0043169//cation binding;GO:0043167//ion binding;GO:0046872//metal ion binding;GO:0046914//transition metal ion binding;GO:0005488//binding;GO:0016491//oxidoreductase activity;GO:0003824//catalytic activity;GO:0016705//oxidoreductase activity, acting on paired donors, with incorporation or reduction of molecular oxygen	GO:0044281//small molecule metabolic process;GO:0006082//organic acid metabolic process;GO:0009987//cellular process;GO:0006629//lipid metabolic process;GO:0044763//single-organism cellular process;GO:0043436//oxoacid metabolic process;GO:0006631//fatty acid metabolic process;GO:0044699//single-organism process;GO:0044238//primary metabolic process;GO:0044255//cellular lipid metabolic process;GO:…
XM_027460103.1	0	0	0	0	0.17	0.08	0.12	0	0.02	0	0	0	22.91	25	26.82	0	-6.53138	0.00901011	0.0248021	CFAP46	PREDICTED: cilia- and flagella-associated protein 46 [Anas platyrhynchos]	-	-	-	-	-	-	-
XM_027460148.1	9.65	8.3	3.56	7.18	27.03	10.42	29.29	27.16	2089.98	977.3	705.25	1386.53	3045.56	2846.78	5518.29	6240.9	-1.71058	5.25e-05	0.0140482	Kndc1	PREDICTED: protein very KIND [Anas platyrhynchos]	-	-	-	-	GO:0044464//cell part;GO:0097458//neuron part;GO:0042995//cell projection;GO:0044297//cell body;GO:0043234//protein complex;GO:0032991//macromolecular complex;GO:0005623//cell;GO:0043005//neuron projection	GO:0005085//guanyl-nucleotide exchange factor activity;GO:0003824//catalytic activity;GO:0016740//transferase activity;GO:0098772//molecular function regulator	GO:0007399//nervous system development;GO:0031344//regulation of cell projection organization;GO:0010769//regulation of cell morphogenesis involved in differentiation;GO:0019222//regulation of metabolic process;GO:0065009//regulation of molecular function;GO:0030902//hindbrain development;GO:0045595//regulation of cell differentiation;GO:0051960//regulation of nervous system development;GO:001097…
XM_027460175.1	0.36	0.26	0	0.25	0	0	0	0	52.53	20.98	0	32.42	0	0	0	0	7.76487	0.00476405	0.0523559	ENTPD1	PREDICTED: ectonucleoside triphosphate diphosphohydrolase 1 isoform X1 [Anas platyrhynchos]	Human Diseases;Metabolism	Nucleotide metabolism;Infectious diseases	ko05169//Epstein-Barr virus infection;ko00230//Purine metabolism;ko00240//Pyrimidine metabolism	K01510	GO:0031982//vesicle;GO:0043226//organelle;GO:0031988//membrane-bounded vesicle;GO:0043227//membrane-bounded organelle	GO:0003824//catalytic activity;GO:0016462//pyrophosphatase activity;GO:0016817//hydrolase activity, acting on acid anhydrides;GO:0016818//hydrolase activity, acting on acid anhydrides, in phosphorus-containing anhydrides;GO:0016787//hydrolase activity	GO:0006725//cellular aromatic compound metabolic process;GO:0044270//cellular nitrogen compound catabolic process;GO:0034641//cellular nitrogen compound metabolic process;GO:0006807//nitrogen compound metabolic process;GO:0050789//regulation of biological process;GO:0007166//cell surface receptor signaling pathway;GO:0008152//metabolic process;GO:0046700//heterocycle catabolic process;GO:0050896/…
XM_027460210.1	0.38	0	0	1.12	0	0	0	0	52.6	0	0	137.18	0	0	0	0	8.55075	0.00641203	0.193192	SEC24C	PREDICTED: protein transport protein Sec24C isoform X1 [Anser cygnoides domesticus]	Genetic Information Processing	Folding, sorting and degradation	ko04141//Protein processing in endoplasmic reticulum	K14007	GO:0030120//vesicle coat;GO:0043227//membrane-bounded organelle;GO:0043234//protein complex;GO:0048475//coated membrane;GO:0031988//membrane-bounded vesicle;GO:0043229//intracellular organelle;GO:0044425//membrane part;GO:0044433//cytoplasmic vesicle part;GO:0016023//cytoplasmic, membrane-bounded vesicle;GO:0098796//membrane protein complex;GO:0031982//vesicle;GO:0005737//cytoplasm;GO:0016020//me…	GO:0046914//transition metal ion binding;GO:0043169//cation binding;GO:0005488//binding;GO:0046872//metal ion binding;GO:0043167//ion binding	GO:0051649//establishment of localization in cell;GO:0046907//intracellular transport;GO:0008104//protein localization;GO:0051179//localization;GO:0071702//organic substance transport;GO:0033036//macromolecule localization;GO:0016482//cytoplasmic transport;GO:0015031//protein transport;GO:0051234//establishment of localization;GO:0051641//cellular localization;GO:0006810//transport;GO:0045184//es…
XM_027460211.1	0	0	0	0	1.3	0.34	0	0	0.02	0	0	0	92.36	58.8	0	0	-8.67948	0.00698967	0.149563	SEC24C	PREDICTED: protein transport protein Sec24C isoform X1 [Anser cygnoides domesticus]	Genetic Information Processing	Folding, sorting and degradation	ko04141//Protein processing in endoplasmic reticulum	K14007	GO:0098796//membrane protein complex;GO:0032991//macromolecular complex;GO:0043231//intracellular membrane-bounded organelle;GO:0044446//intracellular organelle part;GO:0043227//membrane-bounded organelle;GO:0044422//organelle part;GO:0030117//membrane coat;GO:0044444//cytoplasmic part;GO:0098588//bounding membrane of organelle;GO:0031090//organelle membrane;GO:0043229//intracellular organelle;GO…	GO:0005488//binding;GO:0046914//transition metal ion binding;GO:0043167//ion binding;GO:0043169//cation binding;GO:0046872//metal ion binding	GO:0051641//cellular localization;GO:0051234//establishment of localization;GO:0033036//macromolecule localization;GO:0071702//organic substance transport;GO:0045184//establishment of protein localization;GO:0015031//protein transport;GO:0016482//cytoplasmic transport;GO:0006810//transport;GO:0008104//protein localization;GO:0051179//localization;GO:0051649//establishment of localization in cell;…
XM_027460378.1	0.08	0.28	0.13	0.11	0	0	0	0	12.83	23.05	17.98	15.16	0	0	0	0	7.22882	0.00222004	0.000227023	ogdhl	PREDICTED: 2-oxoglutarate dehydrogenase-like, mitochondrial isoform X1 [Anas platyrhynchos]	Metabolism	Carbohydrate metabolism;Global and overview maps;Amino acid metabolism	ko01100//Metabolic pathways;ko01200//Carbon metabolism;ko00310//Lysine degradation;ko00380//Tryptophan metabolism;ko00020//Citrate cycle (TCA cycle)	K00164	-	GO:0036094//small molecule binding;GO:0016903//oxidoreductase activity, acting on the aldehyde or oxo group of donors;GO:0005488//binding;GO:0016491//oxidoreductase activity;GO:0019842//vitamin binding;GO:0003824//catalytic activity	GO:0008152//metabolic process;GO:0044699//single-organism process;GO:0006082//organic acid metabolic process;GO:0043436//oxoacid metabolic process;GO:0044237//cellular metabolic process;GO:0044281//small molecule metabolic process;GO:0006101//citrate metabolic process;GO:0009987//cellular process;GO:0019752//carboxylic acid metabolic process;GO:0044710//single-organism metabolic process;GO:007170…
XM_027460501.1	0	0	0	0	0.72	0.17	0.56	0.15	0	0	0	0	22.65	13.33	29.73	9.77	-8.64386	0.00236561	0.00587868	NT5C2	PREDICTED: cytosolic purine 5'-nucleotidase isoform X2 [Apteryx australis mantelli]	Metabolism	Global and overview maps;Metabolism of cofactors and vitamins;Nucleotide metabolism	ko01100//Metabolic pathways;ko00230//Purine metabolism;ko00240//Pyrimidine metabolism;ko00760//Nicotinate and nicotinamide metabolism	K01081	-	-	-
XM_027460603.1	5.75	0	0	0	0	0	0	0	1305.28	0	0	0	0	0	0	0	10.4893	0.000789855	0.355918	ABLIM1	PREDICTED: actin-binding LIM protein 1 isoform X13 [Anas platyrhynchos]	-	-	-	-	-	-	-
XM_027460684.1	0.25	1.14	0	0.12	0	0	0	0	24.48	60.99	0	10.34	0	0	0	0	8.56033	0.0049076	0.122394	SGMS1	PREDICTED: phosphatidylcholine:ceramide cholinephosphotransferase 1 [Anas platyrhynchos]	Environmental Information Processing;Metabolism	Lipid metabolism;Global and overview maps;Signal transduction	ko01100//Metabolic pathways;ko04071//Sphingolipid signaling pathway;ko00600//Sphingolipid metabolism	K04714	GO:0016020//membrane;GO:0005623//cell;GO:0044464//cell part;GO:0044425//membrane part;GO:0005737//cytoplasm;GO:0043227//membrane-bounded organelle;GO:0043226//organelle;GO:0044424//intracellular part;GO:0005794//Golgi apparatus;GO:0044446//intracellular organelle part;GO:0005622//intracellular;GO:0098588//bounding membrane of organelle;GO:0043229//intracellular organelle;GO:0044431//Golgi apparat…	GO:0003824//catalytic activity;GO:0016780//phosphotransferase activity, for other substituted phosphate groups;GO:0016740//transferase activity;GO:0016772//transferase activity, transferring phosphorus-containing groups	GO:0023052//signaling;GO:0034641//cellular nitrogen compound metabolic process;GO:0007165//signal transduction;GO:0050789//regulation of biological process;GO:0050896//response to stimulus;GO:0006796//phosphate-containing compound metabolic process;GO:0006665//sphingolipid metabolic process;GO:0071704//organic substance metabolic process;GO:0008152//metabolic process;GO:0009987//cellular process;…
XM_027460773.1	2.48	0	5.78	3.78	0.15	0.21	0.08	0	328.95	0	701.71	447.77	10.09	34.73	8.96	0	4.77419	0.00132843	0.0503567	SEC31B	PREDICTED: protein transport protein Sec31B isoform X1 [Anas platyrhynchos]	Genetic Information Processing	Folding, sorting and degradation	ko04141//Protein processing in endoplasmic reticulum	K14005	-	-	-
XM_027460888.1	0	0	0	0	0	0	3.76	0	0	0	0	0	0	0	299.44	0	-9.87652	0.00916254	0.355918	HELLS	PREDICTED: lymphoid-specific helicase isoform X1 [Haliaeetus leucocephalus]	-	-	-	-	GO:0044422//organelle part;GO:0000775//chromosome, centromeric region;GO:0005623//cell;GO:0043229//intracellular organelle;GO:0044427//chromosomal part;GO:0005694//chromosome;GO:0098687//chromosomal region;GO:0044464//cell part;GO:0043227//membrane-bounded organelle;GO:0043231//intracellular membrane-bounded organelle;GO:0044424//intracellular part;GO:0043226//organelle;GO:0005622//intracellular;…	GO:0036094//small molecule binding;GO:0097367//carbohydrate derivative binding;GO:1901363//heterocyclic compound binding;GO:0003676//nucleic acid binding;GO:0001882//nucleoside binding;GO:0032549//ribonucleoside binding;GO:0005488//binding;GO:0032550//purine ribonucleoside binding;GO:0097159//organic cyclic compound binding;GO:0001883//purine nucleoside binding	GO:0070661//leukocyte proliferation;GO:0051252//regulation of RNA metabolic process;GO:0051171//regulation of nitrogen compound metabolic process;GO:0010941//regulation of cell death;GO:0097193//intrinsic apoptotic signaling pathway;GO:0051716//cellular response to stimulus;GO:0060255//regulation of macromolecule metabolic process;GO:0044699//single-organism process;GO:0006807//nitrogen compound …
XM_027461013.1	0	1.41	0	0	0	0	0	0	0	262.36	0	0	0	0	0	0	8.46148	0.00665511	0.355918	Pcnt	PREDICTED: pericentrin isoform X1 [Anas platyrhynchos]	-	-	-	-	-	-	-
XM_027461070.1	0	0	2.57	0.21	0	0	0	0	0	0	172.14	13.61	0	0	0	0	9.44087	0.00795413	0.311474	ccnyl1-b	PREDICTED: cyclin-Y-like protein 1 isoform X1 [Anser cygnoides domesticus]	-	-	-	-	-	GO:0019899//enzyme binding;GO:0019900//kinase binding;GO:0005515//protein binding;GO:0005488//binding	-
XM_027461081.1	8.76	16.04	19.44	6.31	5.29	5.86	5.58	5.87	1146	1140	2326	736	360	967	635	814	1.16139	0.00754788	0.130547	ITGA4	PREDICTED: integrin alpha-4 [Anas platyrhynchos]	Organismal Systems;Human Diseases;Cellular Processes;Environmental Information Processing	Cardiovascular diseases;Infectious diseases;Cell motility;Cellular community - eukaryotes;Immune system;Signal transduction;Signaling molecules and interaction	ko05165//Human papillomavirus infection;ko04151//PI3K-Akt signaling pathway;ko04810//Regulation of actin cytoskeleton;ko04510//Focal adhesion;ko04514//Cell adhesion molecules (CAMs);ko05412//Arrhythmogenic right ventricular cardiomyopathy (ARVC);ko05410//Hypertrophic cardiomyopathy (HCM);ko04670//Leukocyte transendothelial migration;ko05414//Dilated cardiomyopathy (DCM);ko04512//ECM-receptor inte…	K06483	-	-	-
XM_027461110.1	15.23	9.07	13.74	20.09	26.06	29.48	27.22	38.04	3871.08	1252.83	3195.42	4553.57	3446.68	9453.65	6018.29	10256.7	-1.05527	0.0017383	0.0566779	RAPH1	PREDICTED: ras-associated and pleckstrin homology domains-containing protein 1 isoform X4 [Coturnix japonica]	-	-	-	-	GO:0043229//intracellular organelle;GO:0016020//membrane;GO:0043232//intracellular non-membrane-bounded organelle;GO:0005623//cell;GO:0044464//cell part;GO:0042995//cell projection;GO:0005622//intracellular;GO:0044424//intracellular part;GO:0043226//organelle;GO:0031252//cell leading edge;GO:0043228//non-membrane-bounded organelle	GO:0005488//binding	GO:0048858//cell projection morphogenesis;GO:0031589//cell-substrate adhesion;GO:0032502//developmental process;GO:0022610//biological adhesion;GO:0048731//system development;GO:0044699//single-organism process;GO:0009653//anatomical structure morphogenesis;GO:0030182//neuron differentiation;GO:0000902//cell morphogenesis;GO:0030154//cell differentiation;GO:0007155//cell adhesion;GO:0007275//mult…
XM_027461192.1	0.01	0	0.95	0	0	0	0	0	2.32	0	158.4	0.4	0	0	0	0	7.90689	0.00932112	0.345796	Gli2	PREDICTED: zinc finger protein GLI2 [Anas platyrhynchos]	Human Diseases;Environmental Information Processing	Cancers;Signal transduction	ko05200//Pathways in cancer;ko04390//Hippo signaling pathway;ko05217//Basal cell carcinoma;ko04340//Hedgehog signaling pathway	K16798	GO:0016604//nuclear body;GO:0043226//organelle;GO:0005623//cell;GO:0043231//intracellular membrane-bounded organelle;GO:0043227//membrane-bounded organelle;GO:0044422//organelle part;GO:0042995//cell projection;GO:0043229//intracellular organelle;GO:0043233//organelle lumen;GO:0031981//nuclear lumen;GO:0044428//nuclear part;GO:0044424//intracellular part;GO:0005622//intracellular;GO:0044441//cili…	GO:0097159//organic cyclic compound binding;GO:0003676//nucleic acid binding;GO:0043169//cation binding;GO:0046914//transition metal ion binding;GO:1901363//heterocyclic compound binding;GO:0000975//regulatory region DNA binding;GO:0001067//regulatory region nucleic acid binding;GO:0043167//ion binding;GO:0005488//binding;GO:0001071//nucleic acid binding transcription factor activity;GO:0046872//…	GO:0048468//cell development;GO:0001649//osteoblast differentiation;GO:0048732//gland development;GO:0009605//response to external stimulus;GO:0048583//regulation of response to stimulus;GO:0060173//limb development;GO:0009887//organ morphogenesis;GO:0035295//tube development;GO:0061564//axon development;GO:0045595//regulation of cell differentiation;GO:0048731//system development;GO:0035108//lim…
XM_027461330.1	0.17	0.73	0.52	0.3	0	0	0	0	15.7	36.69	43.65	24.51	0	0	0	0	8.74819	0.000438187	0.00288632	TMEM237	PREDICTED: transmembrane protein 237 isoform X3 [Anas platyrhynchos]	-	-	-	-	GO:0043226//organelle;GO:0044441//ciliary part;GO:0005623//cell;GO:0044422//organelle part;GO:0044425//membrane part;GO:0042995//cell projection;GO:0044464//cell part;GO:0005929//cilium;GO:0016020//membrane;GO:0044463//cell projection part;GO:0031224//intrinsic component of membrane	-	GO:0010646//regulation of cell communication;GO:0044085//cellular component biogenesis;GO:0009987//cellular process;GO:0032502//developmental process;GO:0071840//cellular component organization or biogenesis;GO:0044699//single-organism process;GO:0009653//anatomical structure morphogenesis;GO:0032989//cellular component morphogenesis;GO:0048583//regulation of response to stimulus;GO:0016043//cell…
XM_027461363.1	0.2	0.62	0	0.16	0	0	0	0	49.14	83.57	0	35.78	0	0	0	0	7.93664	0.00105961	0.0505982	MAP2	PREDICTED: microtubule-associated protein 2 isoform X3 [Anas platyrhynchos]	-	-	-	-	-	-	-
XM_027461510.1	14.75	16.81	74.11	20.57	13.62	6.97	11.27	7.53	930.66	576.4	4275.83	1156.95	447	554.49	618.54	504.05	1.68027	0.00184097	0.209262	ITGB2	PREDICTED: integrin beta-2 [Anas platyrhynchos]	Cellular Processes;Environmental Information Processing;Organismal Systems;Human Diseases	Signaling molecules and interaction;Signal transduction;Transport and catabolism;Immune system;Infectious diseases;Cardiovascular diseases;Immune diseases;Cell motility	ko04810//Regulation of actin cytoskeleton;ko04015//Rap1 signaling pathway;ko05166//HTLV-I infection;ko04390//Hippo signaling pathway;ko05152//Tuberculosis;ko04514//Cell adhesion molecules (CAMs);ko04670//Leukocyte transendothelial migration;ko04145//Phagosome;ko05146//Amoebiasis;ko04650//Natural killer cell mediated cytotoxicity;ko04610//Complement and coagulation cascades;ko05150//Staphylococcus…	K06464	-	-	-
XM_027461598.1	0	0	0	0	0	0	0.2	0	0	0	0	0	0.14	0	459	0	-5.64386	0.0035191	0.355736	TTN	Titin, partial [Anas platyrhynchos]	Human Diseases	Cardiovascular diseases	ko05410//Hypertrophic cardiomyopathy (HCM);ko05414//Dilated cardiomyopathy (DCM)	K12567	-	-	-
XM_027461635.1	0	0	0	0	0	0.22	0.85	0	0	0	0	0	0	44.02	117.29	0	-8.0634	0.00944102	0.195301	MRVI1	PREDICTED: protein MRVI1 isoform X1 [Anas platyrhynchos]	Organismal Systems;Environmental Information Processing	Circulatory system;Signal transduction	ko04022//cGMP - PKG signaling pathway;ko04270//Vascular smooth muscle contraction	K12337	-	-	GO:0006940//regulation of smooth muscle contraction;GO:0090075//relaxation of muscle;GO:0003012//muscle system process;GO:0050789//regulation of biological process;GO:0044057//regulation of system process;GO:0032501//multicellular organismal process;GO:0044557//relaxation of smooth muscle;GO:0006937//regulation of muscle contraction;GO:0065007//biological regulation;GO:0003008//system process;GO:…
XM_027461692.1	2.9	5.82	5.54	4.66	13	12.59	14.53	9.88	286.57	312.72	501.44	410.71	668.44	1570.08	1249.15	1035.83	-1.40202	0.000914996	0.00844516	TUB	PREDICTED: tubby protein homolog isoform X9 [Anser cygnoides domesticus]	-	-	-	-	-	-	-
XM_027461747.1	0.16	0	0	0	0	0.14	19.69	0	10.44	0	0	0	0	11.49	1147.86	0	-6.95347	0.00745802	0.354057	RALB	PREDICTED: ras-related protein Ral-B [Taeniopygia guttata]	Human Diseases;Environmental Information Processing	Signal transduction;Cancers	ko05200//Pathways in cancer;ko04014//Ras signaling pathway;ko04015//Rap1 signaling pathway;ko04072//Phospholipase D signaling pathway;ko05210//Colorectal cancer;ko05212//Pancreatic cancer	K07835	GO:0016020//membrane;GO:0031988//membrane-bounded vesicle;GO:0043227//membrane-bounded organelle;GO:0044464//cell part;GO:0043226//organelle;GO:0005623//cell;GO:0031982//vesicle	GO:0016787//hydrolase activity;GO:0036094//small molecule binding;GO:0003824//catalytic activity;GO:0016462//pyrophosphatase activity;GO:0001882//nucleoside binding;GO:0097367//carbohydrate derivative binding;GO:0017111//nucleoside-triphosphatase activity;GO:0001883//purine nucleoside binding;GO:0016817//hydrolase activity, acting on acid anhydrides;GO:0032550//purine ribonucleoside binding;GO:00…	GO:0007264//small GTPase mediated signal transduction;GO:0009987//cellular process;GO:0051716//cellular response to stimulus;GO:0007154//cell communication;GO:0022402//cell cycle process;GO:0007049//cell cycle;GO:0035556//intracellular signal transduction;GO:0007165//signal transduction;GO:0044699//single-organism process;GO:0065007//biological regulation;GO:0050794//regulation of cellular proces…
XM_027461815.1	1.12	0	0	0.83	0	0	0	0	103.89	0	0	69.25	0	0	0	0	8.92926	0.00781265	0.146638	Stk17b	PREDICTED: serine/threonine-protein kinase 17B [Anas platyrhynchos]	-	-	-	-	-	-	-
XM_027461855.1	0	0	0	0	0	0.44	1.03	1.86	0	0	0	0	0	34.19	55.06	120.97	-9.70131	0.00126187	0.0846801	SLC25A12	PREDICTED: calcium-binding mitochondrial carrier protein Aralar1, partial [Anas platyrhynchos]	-	-	-	-	-	-	-
[truncated: 132 more rows]
