# Supplementary material for: Transcriptome Sequencing to Identify Important Genes and lncRNAs Regulating Abdominal Fat Deposition in Ducks
Source: Animals (Basel). 2022 May 13;12(10):1256. doi: 10.3390/ani12101256 (PMC9138122; doi:10.3390/ani12101256)
Supplement: Supplementary file 1 [file animals-12-01256-s001.zip › Supplementary Table S2.xls]

## Sheet: Differential lncRNA statistics.
Table S2. Differential lncRNA statistics.
id	HF-1_fpkm	HF-2_fpkm	HF-3_fpkm	HF-4_fpkm	LF-1_fpkm	LF-2_fpkm	LF-3_fpkm	LF-4_fpkm	HF-1_count	HF-2_count	HF-3_count	HF-4_count	LF-1_count	LF-2_count	LF-3_count	LF-4_count	log2(FC)	Pvalue	FDR
TCONS_00000223	0.52	0	0.32	0	0	0	0	0	40.09	0	22.31	0	0	0	0	0	7.71425	0.00500077	0.598333
TCONS_00000285	0	0	0	0.01	0.19	0.04	0.12	0.05	0	0	0	2.63	33.38	14.95	35.06	15.8	-5.32193	0.000135066	0.0727221
TCONS_00004316	0	0	0	0	0.23	0.1	0	0.09	0	0	0	0	29.08	31.19	0	21.92	-6.71425	0.000201145	0.0928285
TCONS_00004494	0.04	0.73	0.2	0.16	0	0	0	0	1	11	5	4	0	0	0	0	8.14211	0.00730187	0.70414
TCONS_00004551	0.05	0	1.29	0	0	0	0	0	2	0	43	0	0	0	0	0	8.38802	0.012447	0.961202
TCONS_00004858	0.01	0	0	0.01	0	0.03	0.14	0.1	2	0	0	1	0	7	20	17	-3.75489	0.0305981	1
TCONS_00005095	2.37	1.08	2.26	2.87	0.13	0.57	0.26	0	250	62	218	270	7	76	24	0	3.15987	0.00332064	0.533149
TCONS_00006909	0	0	0	0	0	0.07	0	0.05	0	0	0	0	0	24.43	0	14.49	-4.90689	0.018104	1
TCONS_00007135	0	0	2.09	0	0	0	0	0	0	0	39	0	0	0	0	0	9.02929	0.0307561	1
TCONS_00008389	0.1	0.24	0	0	0	0	0	0	25.44	35.13	0	0	0	0	0	0	6.40939	0.0043823	0.590947
TCONS_00009358	0	0	0.44	0	0	0	0	0	0	0	33	0	0	0	0	0	6.78136	0.0399704	1
TCONS_00011831	0.25	0.82	0.41	0.28	0.04	0.02	0	0.02	11	20	17	11	1	1	0	1	4.45943	0.000563442	0.1916
TCONS_00012101	0	0.09	0.21	0.08	0	0	0	0	0	2	7.68	3	0	0	0	0	6.56986	0.0383351	1
TCONS_00012331	0	0	0.03	0	0.24	0	0.05	0.17	0	0	3.68	0	18.34	0	6.22	26.41	-3.9386	0.0416882	1
TCONS_00013460	0.12	0	0	0.87	0	0	0	0	28.51	0	0	187.25	0	0	0	0	7.95128	0.000352788	0.13408
TCONS_00013863	0.16	0	0.22	0	0	0	0	0	19.48	0	25.03	0	0	0	0	0	6.56986	0.00901822	0.766667
TCONS_00014904	0	0	0	0	0.09	0.03	0.06	0.03	0	0	0	0	22.56	22.02	26.08	14.68	-5.71425	2.98783e-06	0.0150207
TCONS_00016179	0.19	0.1	0.07	0.11	0.58	0.22	0.72	1.07	14	4	5	7	22	20	46	83	-2.46222	0.00497549	0.598333
TCONS_00016553	0	0	0.01	0	0.1	0	0.11	0.23	0	0	1.03	0	4.05	0	7.51	18.11	-5.45943	0.0263175	1
TCONS_00016754	0.35	0.33	0.04	0.12	0	0.03	0	0	10	5	1	3	0	1	0	0	4.80735	0.0282278	1
TCONS_00016906	0.03	0	0	0	0.11	0.15	0.29	0.09	1.2	0	0	0	2.4	8.4	10.75	4.27	-4.41504	0.0136432	1
TCONS_00017348	0	0	0.27	0	0	0	0	0	0	0	49	0	0	0	0	0	6.07682	0.0213874	1
TCONS_00017350	0	0	0	0	0.22	0	0.79	0.57	0	0	0	0	22.9	0	136.28	121.16	-8.62571	4.64966e-06	0.0150207
TCONS_00017468	0	0.11	0.1	0.07	0	0	0	0	0	7.34	12.2	7.46	0	0	0	0	6.12928	0.00632874	0.663966
TCONS_00018513	0	0	0	0	0	0.02	0.01	0.02	0	0	0	0	0	10.94	2.42	10.74	-3.64386	0.0169609	1
TCONS_00020654	0	0	0.03	0.01	0.19	0.04	0.18	0	0	0	7	3	28	15	45	0	-3.35755	0.0411491	1
TCONS_00021584	0	0	0	0	0.28	0	0	0	0	0	0	0	30.11	0	0	0	-6.12928	0.0335394	1
TCONS_00022524	0.56	0	0.48	0	0	0	0	0	26.81	0	21	0	0	0	0	0	8.02237	0.00837193	0.748467
TCONS_00023688	0.51	1.72	0.32	0.72	0.51	0.05	0.13	0.03	35	64	20	44	18	4	8	2	2.18322	0.0268994	1
TCONS_00023690	0.32	1.03	0.1	0.1	0.04	0	0.04	0.06	30.6	53.2	9.04	8.13	2.1	0	3.25	6	3.46877	0.00347053	0.533149
TCONS_00023693	0.43	1.05	0.25	0.26	0.28	0.05	0.12	0.07	30	40	16	16	10	4	7	5	1.93618	0.0309332	1
TCONS_00024716	0.18	0.43	0.06	0.76	1.69	0.77	1.75	1.88	4.68	6	1.5	17.39	22.5	24.69	39	51	-2.09043	0.0286495	1
TCONS_00026124	0.13	0.07	0.05	0.2	0	0	0	0	8.78	2.43	3.08	12	0	0	0	0	6.81378	0.00293242	0.519339
TCONS_00027979	0.2	0.18	0.04	0.12	0.06	0.01	0	0	33.67	15.84	6.36	16.85	4.9	2.46	0	0	2.94753	0.0173736	1
TCONS_00027980	0	0	0	0	0	0	0.09	0.06	0	0	0	0	0	0	12.99	10.02	-5.22882	0.0397381	1
TCONS_00032182	0.07	0.06	0.73	0	0	0	0	0.03	4	2	40.06	0	0	0	0	2	4.8413	0.0252797	1
TCONS_00033488	0.19	0.57	0.38	0.33	0.02	0.07	0.14	0.03	11.03	17.5	19.96	16.8	0.48	5.28	7	2	2.49923	0.0174671	1
TCONS_00033528	0.07	0.18	0.14	0.1	0.6	0.15	0.44	0.53	12.55	17.61	22.35	16.16	55.35	33.47	68.49	100.37	-1.81155	0.0189072	1
TCONS_00033815	0	0	0	0	0.58	0.05	0.09	0	0	0	0	0	8.02	1.82	2.04	0	-7.49185	0.0459212	1
TCONS_00036158	0.04	0.38	0	0	0	0	0	0	7.41	35.19	0	0.7	0	0	0	0	6.71425	0.00534448	0.623455
TCONS_00036171	0	0	0	0	0	0	0.21	0	0	0	0	0	0	0	37.87	0	-5.71425	0.0407016	1
TCONS_00037080	0.15	0.07	0.16	0.37	0.99	0.38	1.23	0.66	4	1	4	9	14	13	29	19	-2.11991	0.0480493	1
TCONS_00038080	1.39	2.04	1.27	2.56	1.55	4.5	4.58	10.1	164	131	137	270	95	670	470	1265	-1.51368	0.043801	1
TCONS_00039611	0.1	0	0.09	0.07	0.43	0.12	0.61	0.27	8	0	7	5	18.42	13	43.56	24	-2.45943	0.0235662	1
TCONS_00041475	0	0	0.91	0	0	0	0	0	0	0	62.54	0	0	0	0	0	7.82972	0.0145184	1
TCONS_00041891	0	0	0	0	0	0.04	0	0.07	0	0	0	0	0	22.42	0	33.78	-4.78136	0.0079411	0.735799
TCONS_00041892	0	0	0	0	0.22	0.02	0	0	0	0	0	0	57.4	14.17	0	0	-5.90689	0.00217302	0.482657
TCONS_00042713	0.32	0	0.25	0.01	0	0	0	0	53.19	0	39	1.11	0	0	0	0.32	7.17991	0.000594613	0.19209
TCONS_00044239	0	0	0	0	0.07	0.04	0.05	0.09	0	0	0	0	12	15.53	16	31	-5.96578	1.18991e-05	0.015376
TCONS_00045454	0	0	0	0	0	0	0.07	0	0	0	0	0	0	0	46.77	0	-4.12928	0.0298868	1
TCONS_00045460	0	0	0	0	0.13	0.03	0.04	0	0	0	0	0	55.25	31.05	26.95	0	-5.64386	4.43389e-05	0.0409248
TCONS_00045471	0.22	0	0.21	0.03	0	0	0	0.03	36.31	0	32.92	4	0.28	0	0	5.8	3.9386	0.0259876	1
TCONS_00049191	0.05	0	0.1	0.07	0	0	0	0	3	0	5.47	3.73	0	0	0	0	5.78136	0.0366648	1
TCONS_00049834	10.61	0.79	0	0	0	0	0	0	174	7	0	0	0	0	0	0	11.4767	0.000978887	0.274982
TCONS_00050591	1.09	0.06	0.14	0.61	0	0.07	0	0	131.87	4.03	15.64	65.93	0	11.37	0	0	4.7625	0.0024652	0.482657
TCONS_00051033	0.14	0	0.27	0.12	0.05	0	0	0	9.19	0	15.92	6.8	1.63	0	0	0	3.40599	0.0360359	1
TCONS_00051321	0	0	0	0	0.75	0	0	0	0	0	0	0	97.28	0	0	0	-7.55075	0.00492114	0.598333
TCONS_00051877	0.09	0	0.33	0	0	0	0	0	8.85	0	29.25	0	0	0	0	0	6.71425	0.0133506	1
TCONS_00052323	0	0.17	0	0.13	0	0	0	0	0	9.39	0	12.11	0	0	0	0	6.22882	0.0334521	1
TCONS_00052324	0	0	0	0	0.11	0	0.05	0.04	0	0	0	0	8	0	6.45	6.42	-5.64386	0.0146228	1
TCONS_00055803	0.02	0	0	0	0.2	0.21	0.1	0	1.45	0	0	0	7.26	18.26	6.31	0	-4.67243	0.0187892	1
TCONS_00056684	0.05	0.1	0.08	0.09	0.81	0.08	0.65	0.17	2	2	2.69	2.88	15.82	4	21.14	6.6	-2.41785	0.0432221	1
TCONS_00059509	0.56	0	0.46	0.35	0.12	0	0.06	0.03	35.05	0	26.45	19.34	3.79	0	3.04	2	2.70571	0.0279333	1
TCONS_00063324	0	0	0	0	0	0.07	0.09	0	0	0	0	0	0	11	9.84	0	-5.32193	0.0461686	1
TCONS_00066315	0	0.33	0	0.48	0	0	0	0	0	21	0	49.98	0	0	0	0	7.66178	0.00266573	0.506566
TCONS_00066354	0	0	0	0	0.71	0	0.7	0	0	0	0	0	23.02	0	37.83	0	-8.46148	0.00383838	0.551106
TCONS_00066780	0	0	0	0	0.17	0.07	0	0.2	0	0	0	0	16.01	16.64	0	38.45	-6.78136	0.000508437	0.182501
TCONS_00067216	0.24	0.15	0.05	0.27	0.35	0.74	1.69	1.6	39.72	13.96	6.93	40.36	30.9	156.62	247.2	285.72	-2.62504	0.00191803	0.458978
TCONS_00069861	0.1	0.07	0.06	0.05	0	0	0	0	6.46	2.61	3.7	2.68	0	0	0	0	6.12928	0.0084566	0.748467
TCONS_00070922	2.56	3.51	1.04	0.94	0	0	0	1.12	69.77	52.07	25.84	22.8	0	0	0	32.28	2.84549	0.0473815	1
TCONS_00071624	0.52	0.38	0.65	0.65	0	0	0	0.34	45.18	18.2	51.82	50.73	0	0	0	31.28	2.6939	0.0468101	1
TCONS_00072544	0	0	0	0	0	0	0.11	0.2	0	0	0	0	0	0	16	37	-6.27612	0.00865455	0.755636
TCONS_00072719	0.02	0	0	0	0.3	0.64	0	0	0.94	0	0	0	6.23	32.2	0	0	-5.55459	0.0391218	1
XR_001186360.3	0	0	0	0	0	0	0	0.6	0	0	0	0	0	0	0	51.14	-7.22882	0.0312911	1
XR_001187502.2	0.2	0.23	0.03	0.17	0.03	0	0	0	15	9	2	11	1	0	0.25	0	4.39232	0.00717496	0.702385
XR_001187710.3	0.27	0.41	0	0.52	0	0	0	0	9.92	8.11	0	17	0	0	0	0	8.22882	0.00363079	0.533149
XR_001187856.3	0	0	0	0	0	1.79	0	0	0	0	0	0	0	60.37	0	0	-8.80574	0.0235156	1
XR_001188103.2	0.17	0.61	0.37	0.13	3.41	0.67	0.66	1.89	22.45	42.39	43.65	14.84	228.65	109.53	73.51	258.63	-2.37287	0.00350132	0.533149
XR_001188458.3	0	0	0	0	0.2	0.27	0.21	0	0	0	0	0	6.93	22.88	12	0	-7.40939	0.00285202	0.519339
XR_001190174.3	0	0	0	0	0.05	0.15	0.12	0.23	0	0	0	0	2.45	18.25	10.09	23.44	-7.10329	0.00023957	0.103191
XR_001190238.3	1.56	0.76	0.02	0.15	0.11	0.18	0.11	0.04	82	21.63	1	7	3	12	5	2	2.50057	0.0421801	1
XR_001190902.3	0	0	0	0	0.34	0.29	0.44	0	0	0	0	0	20	41	43	0	-8.0634	7.51556e-05	0.0539534
XR_001191081.3	0	0	0	0	0.22	0	0	0.2	0	0	0	0	10.21	0	0	19.19	-6.71425	0.0226705	1
XR_001191758.3	0.1	0.26	0.07	0.08	0	0	0	0	2.5	3.75	1.67	1.76	0	0	0	0	6.99435	0.02992	1
XR_001191990.3	0	0	0	0.24	0	0	0	0	0	0	0	54.23	0	0	0	0	5.90689	0.0188827	1
XR_001192252.3	0	0	0	0	0.24	0	0.18	0.14	0	0	0	0	29.94	0	37.17	35.42	-7.12928	6.26293e-05	0.050581
XR_001192773.3	0	0	0	0	0	0	0.03	0.22	0	0	0	0	0	0	2.87	28.78	-5.96578	0.0345387	1
XR_001193914.3	0.4	0.27	0.25	0.26	0	0	0	0.14	55	20	31	32	0	0	0	21	3.07529	0.0245727	1
XR_001195609.3	0.07	0.37	0.17	0.19	0	0	0	0.02	1.38	4.2	3.23	3.48	0	0	0	0.34	5.32193	0.0171387	1
XR_002398923.2	0.29	0.27	0.24	0.2	0	0.02	0.02	0	23.77	11.76	18.01	14.33	0	1.73	1.49	0	4.64386	0.000334623	0.13408
XR_002399293.2	0	0.26	0.11	0.06	0.43	0.6	1.16	1.15	0	6.97	4.96	2.8	11.03	37.21	49.99	60.27	-2.95744	0.00234592	0.482657
XR_002399966.2	0	0	0	0	0.07	0.02	0	0.06	0	0	0	0	7	5.63	0.26	12	-5.22882	0.00889806	0.766538
XR_002400005.2	0	0	0	0	0	0.06	0.04	0.03	0	0	0	0	0	7.43	2.99	3.26	-5.02237	0.0480939	1
XR_002400257.2	0.02	0.04	0.01	0.02	0.07	0.07	0.1	0.05	5	7	4	6	12	29	28	18	-1.68806	0.0328604	1
XR_002400451.2	0	0	0	0	0.08	0.05	0	0.07	0	0	0	0	4.95	7	0	8.2	-5.64386	0.0176246	1
XR_002401453.2	0.5	0.14	0	0.24	0	0	0	0	29.19	4.43	0	12.68	0	0	0	0	7.78136	0.0024097	0.482657
XR_002401731.2	0.02	0	0	0	0.24	0.06	0.02	0.06	1	0	0	0	8	5	1	4	-4.24793	0.0351804	1
XR_002401822.2	0.39	0	0.06	0	0	0	0	0	58.71	0	7.73	0	0	0	0	0	6.81378	0.0062257	0.663966
XR_002402151.2	0	0.68	0	0.13	0	0	0	0	0	51	0	16.29	0	0	0	0	7.66178	0.00297408	0.519339
XR_002402267.2	0	0	0	0	0.06	0	0.05	0.07	0	0	0	0	5	0	6	11	-5.49185	0.014853	1
XR_002402406.2	0	0	0.1	0	0.34	0.42	0.15	0.34	0	0	8.6	0	17.14	50.69	12.61	34.38	-3.64386	0.0080857	0.735799
XR_002402711.2	0	0	0.01	0.01	0.1	0.1	0.08	0.01	0	0	2	1.3	8	18.1	10.48	2	-3.85798	0.0264411	1
XR_002403052.2	0.19	0.35	0.14	0.11	0.76	0.22	1.01	0.43	15	15	10	8	31	22	69	36	-1.61508	0.040137	1
XR_002403108.2	0.03	0.03	0	0	0	0	0	0	11	6	0.51	0	0	0	0	0	3.90689	0.0357597	1
XR_002403829.2	0	0	0	0	0.16	0.07	0.04	0.06	0	0	0	0	3	2.94	1.22	2.18	-6.36632	0.0437378	1
XR_002404149.2	0.06	0.13	0.01	0.06	0	0	0.01	0.01	12	14	1	11	0	1	2	3	3.70044	0.0282471	1
XR_002404480.2	0	0	0	0	0	0.01	0.03	0.22	0	0	0	0	0	2.17	4	37.5	-6.02237	0.00803478	0.735799
XR_002404603.2	0.29	0.53	0.07	0.15	0	0	0	0.06	9.03	9.17	2	4.14	0	0	0	2.09	4.11548	0.0316688	1
XR_002405105.2	0	0.28	0.13	0.21	0.87	0.36	0.84	0.32	0	15.7	12.25	18.67	46.26	46.61	74.11	34.83	-1.94667	0.0448838	1
XR_002405106.2	0	0	0	0	0	0.14	0	0.27	0	0	0	0	0	18.47	0	29.89	-6.67948	0.0110283	0.890675
XR_002405232.2	0.24	0	0	0.08	0	0	0	0	23.92	0	0	7.24	0	0	0	0	6.32193	0.0247	1
XR_002405640.2	0.05	0.08	0	0.05	0.39	0.2	0.39	0.15	2	2	0	2	9	11	15	7	-2.65025	0.0210715	1
XR_002405656.2	0	0	0	0.01	0	0.02	0.06	0.13	0	0	0	1	0	4	7	19	-4.39232	0.0319607	1
XR_002405909.2	0.5	0.14	0	0	0	0	0	0	20	3	0	0	0	0	0	0	7.32193	0.0477213	1
XR_002406354.2	0	0	0	0	0.19	0.03	0	0.02	0	0	0	0	9.92	3.85	0	2.25	-5.90689	0.0278673	1
XR_002406545.2	0	0	0	0	0.08	0	0.03	0.05	0	0	0	0	5	0	3	6.72	-5.32193	0.0310616	1
XR_003492281.1	0	0.02	0	0.01	0.04	0.19	0.02	0.01	1	4	0	3	10	107	6	5	-3.11548	0.0066037	0.673808
XR_003492400.1	0	0	0	0	0.06	0.03	0.08	0.03	0	0	0	0	2	3	5	2	-5.64386	0.0241471	1
XR_003492471.1	0.63	0.25	0.12	0.23	2.46	5.49	2.19	8.08	28	6	5	9	57	309	85	382	-3.88879	7.93196e-06	0.015376
XR_003492492.1	0	0	0	0	0	0.09	0	0	0	0	0	0	0	90.44	0	0	-4.49185	0.0124967	0.961202
XR_003492494.1	0.03	0.07	0	0	0	0	0	0	22.88	31.91	0	0	0	0	0	0	4.64386	0.00550022	0.623455
XR_003492889.1	1.45	1.5	1.49	1.6	3.41	3.6	3.34	4.8	64	36	60	63	78	200	128	224	-1.3267	0.0439786	1
XR_003492891.1	0	0	0.61	0.73	0	0	0	0	0	0	8.83	10.25	0	0	0	0	8.38802	0.0400795	1
XR_003493025.1	0	0	0	0	0.18	0.51	0.11	0	0	0	0	0	4.4	29.57	4.5	0	-7.64386	0.00599897	0.663966
XR_003493165.1	0.04	0.06	0.05	0.09	0.18	0.18	0.82	0.25	2.24	1.56	2.15	3.99	4.77	11.35	35.71	13.16	-2.57491	0.0247726	1
XR_003493420.1	0	0	0	0	0	0.17	0	0.28	0	0	0	0	0	11	0	14.89	-6.81378	0.0369089	1
XR_003493494.1	0.28	0.17	0.2	0.19	0	0	0	0.04	5.94	2	3.81	3.65	0	0	0	1	4.39232	0.0294116	1
XR_003493495.1	0.41	0	0.58	0.23	0	0	0	0.13	36.65	0	47.2	18.42	0	0	0	12.66	3.2303	0.0438686	1
XR_003493521.1	0.36	0.48	0.37	0.7	0	0	0	0.29	14	10	13	24	0	0	0	12	2.71945	0.0491161	1
XR_003493526.1	0	0	0.28	0.33	0	0	0	0	0	0	34.17	40	0	0	0	0	7.25267	0.00224381	0.482657
XR_003493626.1	0.21	0.25	0.06	0.19	0.04	0.01	0.03	0	22	14.39	6	18	2	1	3	0	3.14975	0.00466013	0.598333
XR_003493925.1	0.53	0.74	2.34	0	0	0	0	0	39.1	29.51	157.82	0	0	0	0	0	9.81778	9.53072e-06	0.015376
XR_003493991.1	5.43	4.03	2.19	3.1	2.2	0.15	0	0	57	23	21	29	12	2	0	0	2.64998	0.0256322	1
XR_003494225.1	0.06	0.07	0.1	0	0	0	0	0	3.29	2.11	4.96	0	0	0	0	0	5.84549	0.0496181	1
XR_003494267.1	0.27	0	0.36	0	0	0	0	0	11.53	0	13.77	0	0	0	0	0	7.29921	0.0294974	1
XR_003494477.1	0	0	0	0	2.74	0	0	0	0	0	0	0	44	0	0	0	-9.41996	0.0183929	1
XR_003494536.1	0	0	0	0	0	0.06	0	0.46	0	0	0	0	0	4.01	0	26.27	-7.02237	0.0352049	1
XR_003494567.1	0	0	0	0	0	0.8	0	0.05	0	0	0	0	0	44.57	0	2.12	-7.73132	0.0182556	1
XR_003494597.1	0	0.01	0.05	0.04	0.35	0.28	0.77	0.29	0	0.31	2.47	1.85	9.13	17.95	33.96	15.5	-4.07895	0.0015049	0.373967
XR_003494933.1	0.19	0.44	0	0.11	0	0	0.03	0	7	9	0	3.55	0	0	1	0	4.62449	0.0472906	1
XR_003494959.1	0	0	0	0	0	0	0	2.72	0	0	0	0	0	0	0	281.99	-9.40939	0.00234039	0.482657
XR_003494960.1	0	0	0	0	1.67	0	0	0	0	0	0	0	88	0	0	0	-8.70563	0.00546027	0.623455
XR_003495182.1	0.43	0.6	0.29	0.52	0.02	0.21	0.05	0.07	54	41	33	59	1	33	6	9	2.39428	0.0119465	0.9413
XR_003495255.1	0.83	0.66	0.28	0.22	0	0.09	0	0	112.34	48.07	35.03	26.17	0	15.09	0	0	4.4667	0.00146808	0.373967
XR_003495259.1	0.18	0.52	0.47	0.42	0	0.19	0	0	14.47	23.13	35.38	31.15	0	19.72	0	0	3.06496	0.0408945	1
XR_003495329.1	0	0	0	0	0	0.02	0.17	0	0	0	0	0	0	4.1	22.09	0	-5.56986	0.0377703	1
XR_003495360.1	0.12	0.04	0.05	0.07	0	0	0	0	10.59	1.83	4.37	5.18	0	0	0	0	6.12928	0.00448172	0.590947
XR_003495427.1	0.09	0.03	0.03	0.1	0	0	0	0.01	6	1	2.1	6	0	0	0	1	4.64386	0.0476786	1
XR_003495473.1	0.55	0.63	0	0.67	0	0	0	0	34.96	21.52	0	37.47	0	0	0	0	8.85331	9.20286e-05	0.0581557
XR_003495931.1	0	0.03	0	0	0.03	0.05	0.18	0.14	0	3.3	0	0	3.93	12.56	34.53	32.72	-3.73697	0.00345696	0.533149
XR_003495950.1	0	0.47	0	0	0	0	0	0	0	124.65	0	0	0	0	0	0	6.87652	0.00439727	0.590947
XR_003495973.1	0	0	0.02	0.05	0	0	0	0	0	0	7.78	17.55	0	0	0	0	4.12928	0.0258163	1
XR_003495980.1	0	0	0	0	0	0.02	0.04	0	0	0	0	0	0	12.96	15.96	0	-3.90689	0.0279309	1
XR_003496051.1	0	0	0	0	0.07	0	0.07	0.05	0	0	0.23	0	3.21	0	5.27	5.18	-5.56986	0.0292229	1
XR_003496066.1	0.07	0	0.09	0	0	0	0	0	9.06	0	10	0	0	0	0	0	5.32193	0.0453537	1
XR_003496067.1	0	0	0	0	0	0.11	0.2	0.04	0	0	0	0	0	8.27	10.43	2.39	-6.45121	0.0216424	1
XR_003496120.1	0	0	0	0	0.44	0	0	0	0	0	0	0	43.68	0	0	0	-6.78136	0.0185027	1
XR_003496285.1	0	0.06	0	0	0.08	0.03	0.06	0.34	0	7.04	0	0	8.68	8.09	11.3	74.84	-3.08746	0.01909	1
XR_003496291.1	0	0	0	0.05	0.28	0.03	0.03	0.4	0	0	0	9.25	27.95	7.56	4.2	80.02	-3.88753	0.0211796	1
XR_003496297.1	0	0	0	0	0	0	0.04	0.18	0	0	0	0	0	0	6.53	36.11	-5.78136	0.0156653	1
XR_003496344.1	0	0.14	0.1	0	0	0	0	0	0	28.62	36	0	0	0	0	0	5.90689	0.00308243	0.524093
XR_003496441.1	0.06	0	0	0	0	0.15	0.48	0.04	6.16	0	0	0	0	21	45.36	4.29	-3.48113	0.0488695	1
XR_003496541.1	0	0	0	0	0	4.08	2.91	2.78	0	0	0	0	0	86.23	42.33	49.28	-11.2541	1.61138e-05	0.0173519
XR_003496543.1	1.67	3.72	0	1.97	0	0	0	0	27.76	33.53	0	29.08	0	0	0	0	10.8455	9.90114e-05	0.0581557
XR_003496563.1	0	0	0	0	0.05	0.07	0.03	0.05	0	0	0	0.34	2.12	7	2.06	4.29	-5.64386	0.0127814	0.971538
XR_003496923.1	0.42	0.06	0	0	0	0	0	0	72.74	5.88	0	0	0	0	0	0	6.90689	0.00477262	0.598333
XR_003496998.1	0	0	0	0	0.58	0	0	0	0	0	0	0	30.67	0	0	0	-7.17991	0.0323336	1
XR_003497027.1	0	0	0	0	0	0.11	0.1	0	0	0	0	0	0	80.66	47.11	0	-5.71425	0.000922595	0.270949
XR_003497063.1	0	0	0	0	0.08	0.02	0.03	0.11	0	0	0	0	3	2	2	8	-5.90689	0.0172053	1
XR_003497098.1	0	0	0	0	0	0.07	0.06	0	0	0	0	0	0	19.88	11.59	0	-5.02237	0.0258564	1
XR_003497421.1	0	0	0	0	0.24	0	0.14	0	0	0	0	0	10	0	10.01	0	-6.56986	0.0355852	1
XR_003497509.1	0.02	0.09	0	0.02	0	0	0	0	4.19	11	0	3.56	0	0	0	0	5.02237	0.0192119	1
XR_003497526.1	0.03	0.06	0.02	0	0	0	0	0	4.59	4	2.76	0	0	0	0	0.18	4.78136	0.0378036	1
XR_003497624.1	0	0	0	0	0.1	0	0.09	0.08	0	0	0	0	7.04	0	10	12	-6.07682	0.00667446	0.673808
XR_003497753.1	0.02	0.01	0	0.01	0.23	0.02	0	0.07	7	2	1	3	35	6	1	20	-3	0.0490293	1
XR_003497816.1	6.33	2.66	6.8	5.08	0.53	1.14	0.45	0.16	691	158	679	494	30	157	43	18	3.19432	0.000186888	0.0928285
XR_003497885.1	0	0	0	0	0	0	0	0.35	0	0	0	0	0	0	0	72.28	-6.45121	0.0187216	1
XR_003497934.1	0	0	0	0	0.19	0	0	0.04	0	0	0	0	12	0.64	0	5.26	-5.84549	0.03008	1
XR_003498393.1	0	0	0	1.24	0	0	0	0	0	0	0	62	0	0	0	0	8.27612	0.0146622	1
XR_003498432.1	0	0.06	0	0.01	0	0	0	0	0	12.91	1.76	1.96	0	0	0	0	4.12928	0.0294626	1
XR_003498444.1	0.35	0	0.05	0.06	0	0	0	0	19.84	0	2.45	3.21	0	0	0	0	6.84549	0.0169973	1
XR_003498450.1	0.22	0.06	0	0	0	0	0	0	44.49	6.37	0	0	0	0	0	0	6.12928	0.0102738	0.862065
XR_003498498.1	0.06	0.18	0.2	0	0	0	0	0	5.27	8.39	16.04	0	0	0	0	0	6.78136	0.00613865	0.663966
XR_003498740.1	0.05	0.14	0.02	0.06	0	0	0.03	0	16.79	23	5.57	16.95	0	0	9	0	3.16993	0.0353172	1
XR_003499027.1	0	0	0	0.01	0.05	0.01	0.04	0.08	1	0	0	2	6	3	9	21	-4.16993	0.0162505	1
XR_003499063.1	0	0	0.01	0	0.19	0.05	0	0	0	0	3.74	0	66	42.37	0	0	-4.58496	0.01707	1
XR_003499420.1	0	0	0	0	0	0.07	0	0.07	0	0	0	0	0	16.73	0	13.13	-5.12928	0.0295169	1
XR_003499445.1	0	0	0	0	0.21	0.06	0	0.14	0	0	0	0	4.3	2.7	0	5.69	-6.67948	0.0405031	1
XR_003499478.1	0.01	0.02	0.01	0	0	0	0	0	4.33	6.74	6.22	0	0	0	0	0	3.32193	0.0199224	1
XR_003499508.1	0	0	0.03	0	0.43	0	0.63	0	0	0	3.57	0	29.62	0	73.34	0	-5.14296	0.0212337	1
XR_003499511.1	0	0	0.03	0	0.43	0	1.18	0	0	0	3.57	0	29.62	0	136.83	0	-5.74595	0.0115342	0.920033
XR_003499613.1	0.05	0.01	0.02	0	0.1	0.14	0.11	0.04	12	1	6	1	14	48	26	10	-2.2854	0.0272847	1
XR_003499679.1	0	0	0	0	0	0.01	0	0.03	0	0	0	0	0	5.26	0	18.88	-3.32193	0.0463346	1
XR_003499736.1	0.14	0	0.13	0	0	0	0	0	16	0	14	0	0	0	0	0	6.07682	0.0218432	1
XR_003499788.1	0.2	0.36	0.21	0.16	0	0	0	0	4	4	4	3	0	0	0	0	7.86109	0.00805265	0.735799
XR_003499828.1	0.35	0.28	0	0	0	0	0	0	18	8	0	0	0	0	0	0	7.29921	0.0303758	1
XR_003499859.1	0.31	0	0	0	0	0	0	0	67.86	0	0	0	0	0	0	0	6.27612	0.0190229	1
XR_003500060.1	0	0	0	0	0	0.43	0	0	0	0	0	0	0	60.43	0	0	-6.74819	0.0235135	1
XR_003500083.1	0	0	0	0	0.35	0	0.12	0	0	0	0	0	16.76	0	9.86	0	-6.87652	0.0199367	1
XR_003500093.1	0.09	0.23	0.07	0.1	0.49	0.4	0.53	0.48	15	22	11	16	45	89	81	89	-1.95515	0.00362512	0.533149
XR_003500147.1	0.16	0.07	0.07	0.04	0.08	0.46	0.09	1.18	8	2	3	2	2	29	4	63	-2.41238	0.0361207	1
XR_003500183.1	0.02	0.03	0.05	0	0	0	0	0	5.57	5.57	14	0	0	0	0	0	4.64386	0.0104282	0.862837
XR_003500264.1	0.05	0	0.03	0	0	0	0	0	38.99	0	26.1	0	0	0	0	0	4.32193	0.00439673	0.590947
XR_003500304.1	2.06	2.25	0.38	1.22	3.04	4.68	2.59	4.56	114.81	68.1	19.28	60.42	87.95	328.11	125.48	268.85	-1.33117	0.0464053	1
XR_003500480.1	0.15	0.27	0	0	0.29	1.06	0.51	0.13	12.74	12.79	0	0	12.86	115.27	38.4	11.73	-2.24431	0.0407366	1
XR_003500576.1	0.04	0.1	0.07	0.04	0.34	0.14	0.34	0.13	4.16	5.49	6.86	3.97	18.55	18.29	30.47	14.76	-1.926	0.0327848	1
XR_003500673.1	0	0	0	0	0.01	0.01	0.02	0.01	0	0	0	0	2.79	2.78	5.58	5	-3.64386	0.0105501	0.862837
XR_003501057.1	0	0	0	0	0.19	0.05	0	0	0	0	0	0	27	18.37	0	0	-5.90689	0.00685689	0.681575
XR_003501168.1	0.34	0.16	0.16	0.4	2.7	0.25	0.65	3.08	19	5	8	20	79	18	32	184	-2.65578	0.00637145	0.663966
XR_003501185.1	0	0	0	0	0	0	0.2	0	0	0	0	0	0	0	43	0	-5.64386	0.0336698	1
XR_003501341.1	0	0	0.01	0	0.04	0.04	0.01	0.05	0	0	1	0	3	7	2	9	-3.80735	0.0234535	1
XR_003501403.1	0.51	0.78	1.66	1.67	0.16	0.09	0.23	0	18	15	54	53	3	4	7	0	3.26679	0.00109068	0.293621
XR_216898.4	0.01	0	0	0	0	0.01	0.05	0.15	2.96	0	0	0	0	3.26	9.55	34.08	-4.39232	0.0329778	1
XR_217450.4	6.98	7.51	11.56	4.15	1.47	1.63	0.66	1.44	183	107	277	97	20	54	15	40	2.53797	0.00063686	0.195941
