# Supplementary material for: Transcriptome Sequencing to Identify Important Genes and lncRNAs Regulating Abdominal Fat Deposition in Ducks
Source: Animals (Basel). 2022 May 13;12(10):1256. doi: 10.3390/ani12101256 (PMC9138122; doi:10.3390/ani12101256)
Supplement: Supplementary file 1 [file animals-12-01256-s001.zip › Supplementary Table S3.xls]

## Sheet: Differential lncRNA target gene
Table S3. Differential lncRNA target gene statistics.
lncRNA_id	lncRNA_Symbol	GeneID	Gene_Symbol	cor	p_value	lncRNA_chr	lncRNA_start	lncRNA_end	lncRNA_strand	Gene_chr	Gene_start	Gene_end	Gene_strand	lncRNA_Description	Gene_Description	KEGG_A_class	KEGG_B_class	Pathway	K_ID	GO Component	GO Function	GO Process
TCONS_00002296	--	NM_001310388.1	IL2RG	0.974808	3.92e-05	NC_040046.1	111228085	111238806	+	NC_040055.1	11625093	11628328	+	--	cytokine receptor common subunit gamma precursor [Anas platyrhynchos]	Organismal Systems;Human Diseases;Cellular Processes;Environmental Information Processing	Transport and catabolism;Immune diseases;Infectious diseases;Cancers;Signaling molecules and interaction;Immune system;Signal transduction	ko05200//Pathways in cancer;ko04151//PI3K-Akt signaling pathway;ko04144//Endocytosis;ko05166//HTLV-I infection;ko04060//Cytokine-cytokine receptor interaction;ko04630//Jak-STAT signaling pathway;ko05162//Measles;ko04659//Th17 cell differentiation;ko04658//Th1 and Th2 cell differentiation;ko05321//Inflammatiory bowel disease (IBD);ko05340//Primary immunodeficiency	K05070	-	-	GO:0065007//biological regulation;GO:0044700//single organism signaling;GO:0051716//cellular response to stimulus;GO:0007165//signal transduction;GO:0007154//cell communication;GO:0044763//single-organism cellular process;GO:0044699//single-organism process;GO:0023052//signaling;GO:0050896//response to stimulus;GO:0050789//regulation of biological process;GO:0007166//cell surface receptor signali…
TCONS_00051877	--	NM_001310388.1	IL2RG	0.98174	1.5e-05	NC_040059.1	13234159	13277368	-	NC_040055.1	11625093	11628328	+	--	cytokine receptor common subunit gamma precursor [Anas platyrhynchos]	Organismal Systems;Human Diseases;Cellular Processes;Environmental Information Processing	Transport and catabolism;Immune diseases;Infectious diseases;Cancers;Signaling molecules and interaction;Immune system;Signal transduction	ko05200//Pathways in cancer;ko04151//PI3K-Akt signaling pathway;ko04144//Endocytosis;ko05166//HTLV-I infection;ko04060//Cytokine-cytokine receptor interaction;ko04630//Jak-STAT signaling pathway;ko05162//Measles;ko04659//Th17 cell differentiation;ko04658//Th1 and Th2 cell differentiation;ko05321//Inflammatiory bowel disease (IBD);ko05340//Primary immunodeficiency	K05070	-	-	GO:0065007//biological regulation;GO:0044700//single organism signaling;GO:0051716//cellular response to stimulus;GO:0007165//signal transduction;GO:0007154//cell communication;GO:0044763//single-organism cellular process;GO:0044699//single-organism process;GO:0023052//signaling;GO:0050896//response to stimulus;GO:0050789//regulation of biological process;GO:0007166//cell surface receptor signali…
XR_003493925.1	--	NM_001310388.1	IL2RG	0.963566	0.000117629	NW_020865859.1	109561	113812	+	NC_040055.1	11625093	11628328	+	--	cytokine receptor common subunit gamma precursor [Anas platyrhynchos]	Organismal Systems;Human Diseases;Cellular Processes;Environmental Information Processing	Transport and catabolism;Immune diseases;Infectious diseases;Cancers;Signaling molecules and interaction;Immune system;Signal transduction	ko05200//Pathways in cancer;ko04151//PI3K-Akt signaling pathway;ko04144//Endocytosis;ko05166//HTLV-I infection;ko04060//Cytokine-cytokine receptor interaction;ko04630//Jak-STAT signaling pathway;ko05162//Measles;ko04659//Th17 cell differentiation;ko04658//Th1 and Th2 cell differentiation;ko05321//Inflammatiory bowel disease (IBD);ko05340//Primary immunodeficiency	K05070	-	-	GO:0065007//biological regulation;GO:0044700//single organism signaling;GO:0051716//cellular response to stimulus;GO:0007165//signal transduction;GO:0007154//cell communication;GO:0044763//single-organism cellular process;GO:0044699//single-organism process;GO:0023052//signaling;GO:0050896//response to stimulus;GO:0050789//regulation of biological process;GO:0007166//cell surface receptor signali…
TCONS_00069861	--	TCONS_00000535	FRY	0.980196	1.91e-05	NW_020865203.1	14680	20907	-	NC_040046.1	22027891	22191291	+	--	XP_005013837.1 PREDICTED: protein furry homolog isoform X6 [Anas platyrhynchos]	-	-	-	-	-	-	-
XR_002398923.2	--	TCONS_00000535	FRY	0.964022	0.000113306	NC_040064.1	849539	901316	-	NC_040046.1	22027891	22191291	+	--	XP_005013837.1 PREDICTED: protein furry homolog isoform X6 [Anas platyrhynchos]	-	-	-	-	-	-	-
XR_003493494.1	--	TCONS_00000535	FRY	0.981936	1.45e-05	NW_020865354.1	139234	142453	+	NC_040046.1	22027891	22191291	+	--	XP_005013837.1 PREDICTED: protein furry homolog isoform X6 [Anas platyrhynchos]	-	-	-	-	-	-	-
XR_003492471.1	--	TCONS_00000668	RCBTB1	0.966133	9.47e-05	NC_040070.1	5689370	5692142	-	NC_040046.1	27617205	27639375	+	--	XP_012950989.1 PREDICTED: RCC1 and BTB domain-containing protein 1 isoform X2 [Anas platyrhynchos]	-	-	-	-	-	-	-
XR_003500147.1	--	TCONS_00000668	RCBTB1	0.950595	0.000290421	NC_040057.1	2752569	2756305	-	NC_040046.1	27617205	27639375	+	--	XP_012950989.1 PREDICTED: RCC1 and BTB domain-containing protein 1 isoform X2 [Anas platyrhynchos]	-	-	-	-	-	-	-
TCONS_00033547	--	TCONS_00001492	SHROOM2	0.959751	0.00015813	NC_040051.1	26275893	26278921	+	NC_040046.1	74311342	74337704	+	--	XP_012951540.1 PREDICTED: protein Shroom2 isoform X1 [Anas platyrhynchos]	-	-	-	-	-	-	-
XR_003496291.1	--	TCONS_00001492	SHROOM2	0.951889	0.000268458	NC_040048.1	38866531	39280193	-	NC_040046.1	74311342	74337704	+	--	XP_012951540.1 PREDICTED: protein Shroom2 isoform X1 [Anas platyrhynchos]	-	-	-	-	-	-	-
XR_003497063.1	--	TCONS_00001492	SHROOM2	0.97808	2.59e-05	NC_040049.1	40232613	40534681	-	NC_040046.1	74311342	74337704	+	--	XP_012951540.1 PREDICTED: protein Shroom2 isoform X1 [Anas platyrhynchos]	-	-	-	-	-	-	-
XR_002398686.2	--	TCONS_00001918	Rps6ka3	0.970105	6.53e-05	NC_040049.1	14757614	14845465	-	NC_040046.1	90389156	90440720	+	--	XP_005010903.1 PREDICTED: ribosomal protein S6 kinase alpha-3 isoform X3 [Anas platyrhynchos]	Cellular Processes;Environmental Information Processing;Organismal Systems;Human Diseases	Environmental adaptation;Nervous system;Signal transduction;Endocrine and metabolic diseases;Endocrine system;Cell growth and death	ko04010//MAPK signaling pathway;ko04714//Thermogenesis;ko04150//mTOR signaling pathway;ko04114//Oocyte meiosis;ko04722//Neurotrophin signaling pathway;ko04720//Long-term potentiation;ko04931//Insulin resistance;ko04914//Progesterone-mediated oocyte maturation	K04373	-	GO:0005488//binding;GO:0004866//endopeptidase inhibitor activity;GO:0004672//protein kinase activity;GO:0004869//cysteine-type endopeptidase inhibitor activity;GO:0097367//carbohydrate derivative binding;GO:0032549//ribonucleoside binding;GO:0030234//enzyme regulator activity;GO:0032550//purine ribonucleoside binding;GO:0043167//ion binding;GO:0097159//organic cyclic compound binding;GO:0004857//…	GO:0010033//response to organic substance;GO:0080090//regulation of primary metabolic process;GO:0051707//response to other organism;GO:0080134//regulation of response to stress;GO:0048518//positive regulation of biological process;GO:0009607//response to biotic stimulus;GO:0031323//regulation of cellular metabolic process;GO:0006355//regulation of transcription, DNA-templated;GO:0002237//respons…
XR_002403108.2	--	TCONS_00001918	Rps6ka3	0.959188	0.000164785	NC_040046.1	131993181	132020617	+	NC_040046.1	90389156	90440720	+	--	XP_005010903.1 PREDICTED: ribosomal protein S6 kinase alpha-3 isoform X3 [Anas platyrhynchos]	Cellular Processes;Environmental Information Processing;Organismal Systems;Human Diseases	Environmental adaptation;Nervous system;Signal transduction;Endocrine and metabolic diseases;Endocrine system;Cell growth and death	ko04010//MAPK signaling pathway;ko04714//Thermogenesis;ko04150//mTOR signaling pathway;ko04114//Oocyte meiosis;ko04722//Neurotrophin signaling pathway;ko04720//Long-term potentiation;ko04931//Insulin resistance;ko04914//Progesterone-mediated oocyte maturation	K04373	-	GO:0005488//binding;GO:0004866//endopeptidase inhibitor activity;GO:0004672//protein kinase activity;GO:0004869//cysteine-type endopeptidase inhibitor activity;GO:0097367//carbohydrate derivative binding;GO:0032549//ribonucleoside binding;GO:0030234//enzyme regulator activity;GO:0032550//purine ribonucleoside binding;GO:0043167//ion binding;GO:0097159//organic cyclic compound binding;GO:0004857//…	GO:0010033//response to organic substance;GO:0080090//regulation of primary metabolic process;GO:0051707//response to other organism;GO:0080134//regulation of response to stress;GO:0048518//positive regulation of biological process;GO:0009607//response to biotic stimulus;GO:0031323//regulation of cellular metabolic process;GO:0006355//regulation of transcription, DNA-templated;GO:0002237//respons…
XR_003495255.1	--	TCONS_00001918	Rps6ka3	0.973546	4.54e-05	NC_040047.1	33224495	33235560	+	NC_040046.1	90389156	90440720	+	--	XP_005010903.1 PREDICTED: ribosomal protein S6 kinase alpha-3 isoform X3 [Anas platyrhynchos]	Cellular Processes;Environmental Information Processing;Organismal Systems;Human Diseases	Environmental adaptation;Nervous system;Signal transduction;Endocrine and metabolic diseases;Endocrine system;Cell growth and death	ko04010//MAPK signaling pathway;ko04714//Thermogenesis;ko04150//mTOR signaling pathway;ko04114//Oocyte meiosis;ko04722//Neurotrophin signaling pathway;ko04720//Long-term potentiation;ko04931//Insulin resistance;ko04914//Progesterone-mediated oocyte maturation	K04373	-	GO:0005488//binding;GO:0004866//endopeptidase inhibitor activity;GO:0004672//protein kinase activity;GO:0004869//cysteine-type endopeptidase inhibitor activity;GO:0097367//carbohydrate derivative binding;GO:0032549//ribonucleoside binding;GO:0030234//enzyme regulator activity;GO:0032550//purine ribonucleoside binding;GO:0043167//ion binding;GO:0097159//organic cyclic compound binding;GO:0004857//…	GO:0010033//response to organic substance;GO:0080090//regulation of primary metabolic process;GO:0051707//response to other organism;GO:0080134//regulation of response to stress;GO:0048518//positive regulation of biological process;GO:0009607//response to biotic stimulus;GO:0031323//regulation of cellular metabolic process;GO:0006355//regulation of transcription, DNA-templated;GO:0002237//respons…
XR_001190902.3	--	TCONS_00002648	PEX5	0.954085	0.000233738	NC_040050.1	47693140	47711270	+	NC_040046.1	121980309	121991303	+	--	XP_011586073.1 PREDICTED: peroxisomal biogenesis factor 5 isoform X2 [Aquila chrysaetos canadensis]	Cellular Processes	Transport and catabolism	ko04146//Peroxisome	K13342	-	-	-
XR_002400257.2	--	TCONS_00002648	PEX5	0.968333	7.75e-05	NC_040061.1	9212256	9234245	-	NC_040046.1	121980309	121991303	+	--	XP_011586073.1 PREDICTED: peroxisomal biogenesis factor 5 isoform X2 [Aquila chrysaetos canadensis]	Cellular Processes	Transport and catabolism	ko04146//Peroxisome	K13342	-	-	-
TCONS_00005095	--	TCONS_00002928	TSPO	0.996042	1.55e-07	NC_040046.1	2034524	2046909	-	NC_040046.1	129540167	129576409	+	--	XP_012965408.1 PREDICTED: translocator protein isoform X3 [Anas platyrhynchos]	Environmental Information Processing;Cellular Processes;Organismal Systems;Human Diseases	Cell growth and death;Infectious diseases;Signaling molecules and interaction;Digestive system	ko04080//Neuroactive ligand-receptor interaction;ko05166//HTLV-I infection;ko04979//Cholesterol metabolism;ko04214//Apoptosis - fly	K05770	GO:0005623//cell;GO:0031982//vesicle;GO:0043227//membrane-bounded organelle;GO:0031090//organelle membrane;GO:0043229//intracellular organelle;GO:0016020//membrane;GO:0031224//intrinsic component of membrane;GO:0031988//membrane-bounded vesicle;GO:0044422//organelle part;GO:0044464//cell part;GO:0005622//intracellular;GO:0043226//organelle;GO:0044425//membrane part;GO:0044424//intracellular part;…	-	-
XR_003496541.1	--	TCONS_00003882	SCYL2	0.95699	0.000192552	NC_040048.1	81234143	81241482	+	NC_040046.1	158249700	158285445	+	--	XP_013038068.1 PREDICTED: SCY1-like protein 2 isoform X1 [Anser cygnoides domesticus]	-	-	-	-	-	GO:0016740//transferase activity;GO:0036094//small molecule binding;GO:0001882//nucleoside binding;GO:0003824//catalytic activity;GO:0005515//protein binding;GO:0097367//carbohydrate derivative binding;GO:0005488//binding;GO:0016301//kinase activity;GO:1901363//heterocyclic compound binding;GO:0001883//purine nucleoside binding;GO:0097159//organic cyclic compound binding;GO:0016772//transferase a…	GO:0046907//intracellular transport;GO:0030100//regulation of endocytosis;GO:0045807//positive regulation of endocytosis;GO:0044765//single-organism transport;GO:0051128//regulation of cellular component organization;GO:0050794//regulation of cellular process;GO:0006897//endocytosis;GO:0051130//positive regulation of cellular component organization;GO:0051234//establishment of localization;GO:005…
TCONS_00008389	--	TCONS_00004517	PLXNB2	0.999796	2.11e-11	NC_040046.1	129859216	129875551	-	NC_040046.1	181560285	181822590	+	--	XP_005020911.1 PREDICTED: plexin-B2 [Anas platyrhynchos]	Organismal Systems	Development	ko04360//Axon guidance	K06821	GO:0044464//cell part;GO:0016020//membrane;GO:0031224//intrinsic component of membrane;GO:0031982//vesicle;GO:0043227//membrane-bounded organelle;GO:0005623//cell;GO:0031988//membrane-bounded vesicle;GO:0016021//integral component of membrane;GO:0043226//organelle;GO:0044425//membrane part	GO:0060089//molecular transducer activity;GO:0004888//transmembrane signaling receptor activity;GO:0038023//signaling receptor activity;GO:0004871//signal transducer activity;GO:0099600//transmembrane receptor activity;GO:0004872//receptor activity	GO:0061351//neural precursor cell proliferation;GO:0007166//cell surface receptor signaling pathway;GO:0006928//movement of cell or subcellular component;GO:0019222//regulation of metabolic process;GO:0032501//multicellular organismal process;GO:0001764//neuron migration;GO:0007417//central nervous system development;GO:0007399//nervous system development;GO:0044763//single-organism cellular proc…
TCONS_00023690	--	TCONS_00004517	PLXNB2	0.98247	1.33e-05	NC_040049.1	7077553	7084395	+	NC_040046.1	181560285	181822590	+	--	XP_005020911.1 PREDICTED: plexin-B2 [Anas platyrhynchos]	Organismal Systems	Development	ko04360//Axon guidance	K06821	GO:0044464//cell part;GO:0016020//membrane;GO:0031224//intrinsic component of membrane;GO:0031982//vesicle;GO:0043227//membrane-bounded organelle;GO:0005623//cell;GO:0031988//membrane-bounded vesicle;GO:0016021//integral component of membrane;GO:0043226//organelle;GO:0044425//membrane part	GO:0060089//molecular transducer activity;GO:0004888//transmembrane signaling receptor activity;GO:0038023//signaling receptor activity;GO:0004871//signal transducer activity;GO:0099600//transmembrane receptor activity;GO:0004872//receptor activity	GO:0061351//neural precursor cell proliferation;GO:0007166//cell surface receptor signaling pathway;GO:0006928//movement of cell or subcellular component;GO:0019222//regulation of metabolic process;GO:0032501//multicellular organismal process;GO:0001764//neuron migration;GO:0007417//central nervous system development;GO:0007399//nervous system development;GO:0044763//single-organism cellular proc…
TCONS_00023693	--	TCONS_00004517	PLXNB2	0.953472	0.000243114	NC_040049.1	7085229	7088193	+	NC_040046.1	181560285	181822590	+	--	XP_005020911.1 PREDICTED: plexin-B2 [Anas platyrhynchos]	Organismal Systems	Development	ko04360//Axon guidance	K06821	GO:0044464//cell part;GO:0016020//membrane;GO:0031224//intrinsic component of membrane;GO:0031982//vesicle;GO:0043227//membrane-bounded organelle;GO:0005623//cell;GO:0031988//membrane-bounded vesicle;GO:0016021//integral component of membrane;GO:0043226//organelle;GO:0044425//membrane part	GO:0060089//molecular transducer activity;GO:0004888//transmembrane signaling receptor activity;GO:0038023//signaling receptor activity;GO:0004871//signal transducer activity;GO:0099600//transmembrane receptor activity;GO:0004872//receptor activity	GO:0061351//neural precursor cell proliferation;GO:0007166//cell surface receptor signaling pathway;GO:0006928//movement of cell or subcellular component;GO:0019222//regulation of metabolic process;GO:0032501//multicellular organismal process;GO:0001764//neuron migration;GO:0007417//central nervous system development;GO:0007399//nervous system development;GO:0044763//single-organism cellular proc…
XR_002404603.2	--	TCONS_00004517	PLXNB2	0.960975	0.000144268	NW_020865824.1	26310	33485	-	NC_040046.1	181560285	181822590	+	--	XP_005020911.1 PREDICTED: plexin-B2 [Anas platyrhynchos]	Organismal Systems	Development	ko04360//Axon guidance	K06821	GO:0044464//cell part;GO:0016020//membrane;GO:0031224//intrinsic component of membrane;GO:0031982//vesicle;GO:0043227//membrane-bounded organelle;GO:0005623//cell;GO:0031988//membrane-bounded vesicle;GO:0016021//integral component of membrane;GO:0043226//organelle;GO:0044425//membrane part	GO:0060089//molecular transducer activity;GO:0004888//transmembrane signaling receptor activity;GO:0038023//signaling receptor activity;GO:0004871//signal transducer activity;GO:0099600//transmembrane receptor activity;GO:0004872//receptor activity	GO:0061351//neural precursor cell proliferation;GO:0007166//cell surface receptor signaling pathway;GO:0006928//movement of cell or subcellular component;GO:0019222//regulation of metabolic process;GO:0032501//multicellular organismal process;GO:0001764//neuron migration;GO:0007417//central nervous system development;GO:0007399//nervous system development;GO:0044763//single-organism cellular proc…
XR_003492443.1	--	TCONS_00004517	PLXNB2	0.97058	6.23e-05	NC_040070.1	2110458	2150180	-	NC_040046.1	181560285	181822590	+	--	XP_005020911.1 PREDICTED: plexin-B2 [Anas platyrhynchos]	Organismal Systems	Development	ko04360//Axon guidance	K06821	GO:0044464//cell part;GO:0016020//membrane;GO:0031224//intrinsic component of membrane;GO:0031982//vesicle;GO:0043227//membrane-bounded organelle;GO:0005623//cell;GO:0031988//membrane-bounded vesicle;GO:0016021//integral component of membrane;GO:0043226//organelle;GO:0044425//membrane part	GO:0060089//molecular transducer activity;GO:0004888//transmembrane signaling receptor activity;GO:0038023//signaling receptor activity;GO:0004871//signal transducer activity;GO:0099600//transmembrane receptor activity;GO:0004872//receptor activity	GO:0061351//neural precursor cell proliferation;GO:0007166//cell surface receptor signaling pathway;GO:0006928//movement of cell or subcellular component;GO:0019222//regulation of metabolic process;GO:0032501//multicellular organismal process;GO:0001764//neuron migration;GO:0007417//central nervous system development;GO:0007399//nervous system development;GO:0044763//single-organism cellular proc…
XR_003492494.1	--	TCONS_00004517	PLXNB2	0.999959	1.71e-13	NC_040070.1	4732667	4879343	-	NC_040046.1	181560285	181822590	+	--	XP_005020911.1 PREDICTED: plexin-B2 [Anas platyrhynchos]	Organismal Systems	Development	ko04360//Axon guidance	K06821	GO:0044464//cell part;GO:0016020//membrane;GO:0031224//intrinsic component of membrane;GO:0031982//vesicle;GO:0043227//membrane-bounded organelle;GO:0005623//cell;GO:0031988//membrane-bounded vesicle;GO:0016021//integral component of membrane;GO:0043226//organelle;GO:0044425//membrane part	GO:0060089//molecular transducer activity;GO:0004888//transmembrane signaling receptor activity;GO:0038023//signaling receptor activity;GO:0004871//signal transducer activity;GO:0099600//transmembrane receptor activity;GO:0004872//receptor activity	GO:0061351//neural precursor cell proliferation;GO:0007166//cell surface receptor signaling pathway;GO:0006928//movement of cell or subcellular component;GO:0019222//regulation of metabolic process;GO:0032501//multicellular organismal process;GO:0001764//neuron migration;GO:0007417//central nervous system development;GO:0007399//nervous system development;GO:0044763//single-organism cellular proc…
XR_003493829.1	--	TCONS_00004517	PLXNB2	0.978404	2.48e-05	NW_020865675.1	36803	38302	+	NC_040046.1	181560285	181822590	+	--	XP_005020911.1 PREDICTED: plexin-B2 [Anas platyrhynchos]	Organismal Systems	Development	ko04360//Axon guidance	K06821	GO:0044464//cell part;GO:0016020//membrane;GO:0031224//intrinsic component of membrane;GO:0031982//vesicle;GO:0043227//membrane-bounded organelle;GO:0005623//cell;GO:0031988//membrane-bounded vesicle;GO:0016021//integral component of membrane;GO:0043226//organelle;GO:0044425//membrane part	GO:0060089//molecular transducer activity;GO:0004888//transmembrane signaling receptor activity;GO:0038023//signaling receptor activity;GO:0004871//signal transducer activity;GO:0099600//transmembrane receptor activity;GO:0004872//receptor activity	GO:0061351//neural precursor cell proliferation;GO:0007166//cell surface receptor signaling pathway;GO:0006928//movement of cell or subcellular component;GO:0019222//regulation of metabolic process;GO:0032501//multicellular organismal process;GO:0001764//neuron migration;GO:0007417//central nervous system development;GO:0007399//nervous system development;GO:0044763//single-organism cellular proc…
XR_003494933.1	--	TCONS_00004517	PLXNB2	0.970078	6.55e-05	NC_040046.1	122057549	122059719	+	NC_040046.1	181560285	181822590	+	--	XP_005020911.1 PREDICTED: plexin-B2 [Anas platyrhynchos]	Organismal Systems	Development	ko04360//Axon guidance	K06821	GO:0044464//cell part;GO:0016020//membrane;GO:0031224//intrinsic component of membrane;GO:0031982//vesicle;GO:0043227//membrane-bounded organelle;GO:0005623//cell;GO:0031988//membrane-bounded vesicle;GO:0016021//integral component of membrane;GO:0043226//organelle;GO:0044425//membrane part	GO:0060089//molecular transducer activity;GO:0004888//transmembrane signaling receptor activity;GO:0038023//signaling receptor activity;GO:0004871//signal transducer activity;GO:0099600//transmembrane receptor activity;GO:0004872//receptor activity	GO:0061351//neural precursor cell proliferation;GO:0007166//cell surface receptor signaling pathway;GO:0006928//movement of cell or subcellular component;GO:0019222//regulation of metabolic process;GO:0032501//multicellular organismal process;GO:0001764//neuron migration;GO:0007417//central nervous system development;GO:0007399//nervous system development;GO:0044763//single-organism cellular proc…
XR_003496080.1	--	TCONS_00004517	PLXNB2	0.951582	0.000273556	NC_040048.1	13579017	13583395	-	NC_040046.1	181560285	181822590	+	--	XP_005020911.1 PREDICTED: plexin-B2 [Anas platyrhynchos]	Organismal Systems	Development	ko04360//Axon guidance	K06821	GO:0044464//cell part;GO:0016020//membrane;GO:0031224//intrinsic component of membrane;GO:0031982//vesicle;GO:0043227//membrane-bounded organelle;GO:0005623//cell;GO:0031988//membrane-bounded vesicle;GO:0016021//integral component of membrane;GO:0043226//organelle;GO:0044425//membrane part	GO:0060089//molecular transducer activity;GO:0004888//transmembrane signaling receptor activity;GO:0038023//signaling receptor activity;GO:0004871//signal transducer activity;GO:0099600//transmembrane receptor activity;GO:0004872//receptor activity	GO:0061351//neural precursor cell proliferation;GO:0007166//cell surface receptor signaling pathway;GO:0006928//movement of cell or subcellular component;GO:0019222//regulation of metabolic process;GO:0032501//multicellular organismal process;GO:0001764//neuron migration;GO:0007417//central nervous system development;GO:0007399//nervous system development;GO:0044763//single-organism cellular proc…
XR_002400105.2	--	TCONS_00004581	Celsr1	0.971394	5.73e-05	NC_040048.1	40558610	40561813	-	NC_040046.1	186910767	187069833	+	--	XP_010579383.1 PREDICTED: cadherin EGF LAG seven-pass G-type receptor 1, partial [Haliaeetus leucocephalus]	-	-	-	-	GO:0044464//cell part;GO:0031224//intrinsic component of membrane;GO:0043226//organelle;GO:0044424//intracellular part;GO:0005622//intracellular;GO:0016020//membrane;GO:0043229//intracellular organelle;GO:0043227//membrane-bounded organelle;GO:0044425//membrane part;GO:0005623//cell;GO:0043231//intracellular membrane-bounded organelle	GO:0038023//signaling receptor activity;GO:0043169//cation binding;GO:0043167//ion binding;GO:0004888//transmembrane signaling receptor activity;GO:0099600//transmembrane receptor activity;GO:0004871//signal transducer activity;GO:0046872//metal ion binding;GO:0060089//molecular transducer activity;GO:0005488//binding;GO:0004872//receptor activity	GO:0035239//tube morphogenesis;GO:0060541//respiratory system development;GO:0051716//cellular response to stimulus;GO:0022603//regulation of anatomical structure morphogenesis;GO:0009653//anatomical structure morphogenesis;GO:0006950//response to stress;GO:0003002//regionalization;GO:0090175//regulation of establishment of planar polarity;GO:0044700//single organism signaling;GO:0007275//multice…
TCONS_00000285	--	TCONS_00005031	Lcmt2	0.968328	7.76e-05	NC_040046.1	8404934	8425213	+	NC_040046.1	569542	596599	-	--	XP_012964224.1 PREDICTED: tRNA wybutosine-synthesizing protein 4 [Anas platyrhynchos]	-	-	-	-	-	-	-
TCONS_00052324	--	TCONS_00005031	Lcmt2	0.990721	1.98e-06	NC_040060.1	6448534	6455985	+	NC_040046.1	569542	596599	-	--	XP_012964224.1 PREDICTED: tRNA wybutosine-synthesizing protein 4 [Anas platyrhynchos]	-	-	-	-	-	-	-
TCONS_00056684	--	TCONS_00005031	Lcmt2	0.95285	0.000252866	NC_040064.1	1512138	1518330	+	NC_040046.1	569542	596599	-	--	XP_012964224.1 PREDICTED: tRNA wybutosine-synthesizing protein 4 [Anas platyrhynchos]	-	-	-	-	-	-	-
XR_001192252.3	--	TCONS_00005031	Lcmt2	0.986085	6.67e-06	NC_040046.1	27989435	28007208	+	NC_040046.1	569542	596599	-	--	XP_012964224.1 PREDICTED: tRNA wybutosine-synthesizing protein 4 [Anas platyrhynchos]	-	-	-	-	-	-	-
XR_003498107.1	--	TCONS_00005031	Lcmt2	0.959689	0.000158853	NC_040051.1	448811	457264	-	NC_040046.1	569542	596599	-	--	XP_012964224.1 PREDICTED: tRNA wybutosine-synthesizing protein 4 [Anas platyrhynchos]	-	-	-	-	-	-	-
TCONS_00041891	--	TCONS_00005457	PSPC1	0.953379	0.000244553	NC_040054.1	10486383	10510102	+	NC_040046.1	17524401	17540121	-	--	NP_001026002.1 paraspeckle component 1 [Gallus gallus]	-	-	-	-	GO:0005623//cell;GO:0016604//nuclear body;GO:0043228//non-membrane-bounded organelle;GO:0043227//membrane-bounded organelle;GO:0044422//organelle part;GO:0044446//intracellular organelle part;GO:0043229//intracellular organelle;GO:0043226//organelle;GO:0031974//membrane-enclosed lumen;GO:0044451//nucleoplasm part;GO:0070013//intracellular organelle lumen;GO:0043232//intracellular non-membrane-bou…	GO:0000975//regulatory region DNA binding;GO:0044212//transcription regulatory region DNA binding;GO:0005488//binding;GO:0001067//regulatory region nucleic acid binding;GO:0097159//organic cyclic compound binding;GO:1901363//heterocyclic compound binding;GO:0003677//DNA binding;GO:0003676//nucleic acid binding;GO:0003723//RNA binding	GO:2001141//regulation of RNA biosynthetic process;GO:2000112//regulation of cellular macromolecule biosynthetic process;GO:0050789//regulation of biological process;GO:0019219//regulation of nucleobase-containing compound metabolic process;GO:1903506//regulation of nucleic acid-templated transcription;GO:0051171//regulation of nitrogen compound metabolic process;GO:0050794//regulation of cellula…
XR_002404480.2	--	TCONS_00005457	PSPC1	0.965025	0.000104176	NC_040048.1	46452115	46470181	-	NC_040046.1	17524401	17540121	-	--	NP_001026002.1 paraspeckle component 1 [Gallus gallus]	-	-	-	-	GO:0005623//cell;GO:0016604//nuclear body;GO:0043228//non-membrane-bounded organelle;GO:0043227//membrane-bounded organelle;GO:0044422//organelle part;GO:0044446//intracellular organelle part;GO:0043229//intracellular organelle;GO:0043226//organelle;GO:0031974//membrane-enclosed lumen;GO:0044451//nucleoplasm part;GO:0070013//intracellular organelle lumen;GO:0043232//intracellular non-membrane-bou…	GO:0000975//regulatory region DNA binding;GO:0044212//transcription regulatory region DNA binding;GO:0005488//binding;GO:0001067//regulatory region nucleic acid binding;GO:0097159//organic cyclic compound binding;GO:1901363//heterocyclic compound binding;GO:0003677//DNA binding;GO:0003676//nucleic acid binding;GO:0003723//RNA binding	GO:2001141//regulation of RNA biosynthetic process;GO:2000112//regulation of cellular macromolecule biosynthetic process;GO:0050789//regulation of biological process;GO:0019219//regulation of nucleobase-containing compound metabolic process;GO:1903506//regulation of nucleic acid-templated transcription;GO:0051171//regulation of nitrogen compound metabolic process;GO:0050794//regulation of cellula…
XR_003500147.1	--	TCONS_00005457	PSPC1	0.991126	1.74e-06	NC_040057.1	2752569	2756305	-	NC_040046.1	17524401	17540121	-	--	NP_001026002.1 paraspeckle component 1 [Gallus gallus]	-	-	-	-	GO:0005623//cell;GO:0016604//nuclear body;GO:0043228//non-membrane-bounded organelle;GO:0043227//membrane-bounded organelle;GO:0044422//organelle part;GO:0044446//intracellular organelle part;GO:0043229//intracellular organelle;GO:0043226//organelle;GO:0031974//membrane-enclosed lumen;GO:0044451//nucleoplasm part;GO:0070013//intracellular organelle lumen;GO:0043232//intracellular non-membrane-bou…	GO:0000975//regulatory region DNA binding;GO:0044212//transcription regulatory region DNA binding;GO:0005488//binding;GO:0001067//regulatory region nucleic acid binding;GO:0097159//organic cyclic compound binding;GO:1901363//heterocyclic compound binding;GO:0003677//DNA binding;GO:0003676//nucleic acid binding;GO:0003723//RNA binding	GO:2001141//regulation of RNA biosynthetic process;GO:2000112//regulation of cellular macromolecule biosynthetic process;GO:0050789//regulation of biological process;GO:0019219//regulation of nucleobase-containing compound metabolic process;GO:1903506//regulation of nucleic acid-templated transcription;GO:0051171//regulation of nitrogen compound metabolic process;GO:0050794//regulation of cellula…
XR_003496344.1	--	TCONS_00007076	GABPA	0.958751	0.000170079	NC_040048.1	40261803	40355065	-	NC_040046.1	97129258	97153663	-	--	XP_005011496.1 PREDICTED: GA-binding protein alpha chain isoform X1 [Anas platyrhynchos]	-	-	-	-	GO:0005694//chromosome;GO:0043232//intracellular non-membrane-bounded organelle;GO:0043228//non-membrane-bounded organelle;GO:0044424//intracellular part;GO:0043229//intracellular organelle;GO:0000785//chromatin;GO:0044464//cell part;GO:0043226//organelle;GO:0032991//macromolecular complex;GO:0005623//cell;GO:0044446//intracellular organelle part;GO:0044427//chromosomal part;GO:0044422//organelle…	GO:1901363//heterocyclic compound binding;GO:0043565//sequence-specific DNA binding;GO:0000977//RNA polymerase II regulatory region sequence-specific DNA binding;GO:0001071//nucleic acid binding transcription factor activity;GO:0003700//transcription factor activity, sequence-specific DNA binding;GO:0046983//protein dimerization activity;GO:0000981//RNA polymerase II transcription factor activity…	GO:2000112//regulation of cellular macromolecule biosynthetic process;GO:0006355//regulation of transcription, DNA-templated;GO:0019222//regulation of metabolic process;GO:0051241//negative regulation of multicellular organismal process;GO:0031323//regulation of cellular metabolic process;GO:0080090//regulation of primary metabolic process;GO:0060255//regulation of macromolecule metabolic process…
XR_003498498.1	--	TCONS_00007076	GABPA	0.970049	6.57e-05	NC_040052.1	13487833	13504177	+	NC_040046.1	97129258	97153663	-	--	XP_005011496.1 PREDICTED: GA-binding protein alpha chain isoform X1 [Anas platyrhynchos]	-	-	-	-	GO:0005694//chromosome;GO:0043232//intracellular non-membrane-bounded organelle;GO:0043228//non-membrane-bounded organelle;GO:0044424//intracellular part;GO:0043229//intracellular organelle;GO:0000785//chromatin;GO:0044464//cell part;GO:0043226//organelle;GO:0032991//macromolecular complex;GO:0005623//cell;GO:0044446//intracellular organelle part;GO:0044427//chromosomal part;GO:0044422//organelle…	GO:1901363//heterocyclic compound binding;GO:0043565//sequence-specific DNA binding;GO:0000977//RNA polymerase II regulatory region sequence-specific DNA binding;GO:0001071//nucleic acid binding transcription factor activity;GO:0003700//transcription factor activity, sequence-specific DNA binding;GO:0046983//protein dimerization activity;GO:0000981//RNA polymerase II transcription factor activity…	GO:2000112//regulation of cellular macromolecule biosynthetic process;GO:0006355//regulation of transcription, DNA-templated;GO:0019222//regulation of metabolic process;GO:0051241//negative regulation of multicellular organismal process;GO:0031323//regulation of cellular metabolic process;GO:0080090//regulation of primary metabolic process;GO:0060255//regulation of macromolecule metabolic process…
TCONS_00038080	--	TCONS_00008047	EPHB5	0.968725	7.47e-05	NC_040052.1	28830732	28842721	-	NC_040046.1	122565480	122648839	-	--	EOB03603.1 Ephrin type-B receptor 5, partial [Anas platyrhynchos]	Organismal Systems	Development	ko04360//Axon guidance	K05111	GO:0044425//membrane part;GO:0016021//integral component of membrane;GO:0031224//intrinsic component of membrane;GO:0016020//membrane	GO:0016773//phosphotransferase activity, alcohol group as acceptor;GO:0004713//protein tyrosine kinase activity;GO:0019199//transmembrane receptor protein kinase activity;GO:0060089//molecular transducer activity;GO:0004872//receptor activity;GO:0032550//purine ribonucleoside binding;GO:0032549//ribonucleoside binding;GO:0099600//transmembrane receptor activity;GO:0005488//binding;GO:0003824//cat…	GO:0048878//chemical homeostasis;GO:0019538//protein metabolic process;GO:0050801//ion homeostasis;GO:0050886//endocrine process;GO:0006793//phosphorus metabolic process;GO:0055080//cation homeostasis;GO:0051234//establishment of localization;GO:0007165//signal transduction;GO:0009987//cellular process;GO:0044237//cellular metabolic process;GO:0051649//establishment of localization in cell;GO:003…
TCONS_00072544	--	TCONS_00008047	EPHB5	0.978912	2.31e-05	NW_020866515.1	115506	124993	-	NC_040046.1	122565480	122648839	-	--	EOB03603.1 Ephrin type-B receptor 5, partial [Anas platyrhynchos]	Organismal Systems	Development	ko04360//Axon guidance	K05111	GO:0044425//membrane part;GO:0016021//integral component of membrane;GO:0031224//intrinsic component of membrane;GO:0016020//membrane	GO:0016773//phosphotransferase activity, alcohol group as acceptor;GO:0004713//protein tyrosine kinase activity;GO:0019199//transmembrane receptor protein kinase activity;GO:0060089//molecular transducer activity;GO:0004872//receptor activity;GO:0032550//purine ribonucleoside binding;GO:0032549//ribonucleoside binding;GO:0099600//transmembrane receptor activity;GO:0005488//binding;GO:0003824//cat…	GO:0048878//chemical homeostasis;GO:0019538//protein metabolic process;GO:0050801//ion homeostasis;GO:0050886//endocrine process;GO:0006793//phosphorus metabolic process;GO:0055080//cation homeostasis;GO:0051234//establishment of localization;GO:0007165//signal transduction;GO:0009987//cellular process;GO:0044237//cellular metabolic process;GO:0051649//establishment of localization in cell;GO:003…
XR_002405656.2	--	TCONS_00008047	EPHB5	0.994698	3.71e-07	NC_040054.1	1915527	1928387	+	NC_040046.1	122565480	122648839	-	--	EOB03603.1 Ephrin type-B receptor 5, partial [Anas platyrhynchos]	Organismal Systems	Development	ko04360//Axon guidance	K05111	GO:0044425//membrane part;GO:0016021//integral component of membrane;GO:0031224//intrinsic component of membrane;GO:0016020//membrane	GO:0016773//phosphotransferase activity, alcohol group as acceptor;GO:0004713//protein tyrosine kinase activity;GO:0019199//transmembrane receptor protein kinase activity;GO:0060089//molecular transducer activity;GO:0004872//receptor activity;GO:0032550//purine ribonucleoside binding;GO:0032549//ribonucleoside binding;GO:0099600//transmembrane receptor activity;GO:0005488//binding;GO:0003824//cat…	GO:0048878//chemical homeostasis;GO:0019538//protein metabolic process;GO:0050801//ion homeostasis;GO:0050886//endocrine process;GO:0006793//phosphorus metabolic process;GO:0055080//cation homeostasis;GO:0051234//establishment of localization;GO:0007165//signal transduction;GO:0009987//cellular process;GO:0044237//cellular metabolic process;GO:0051649//establishment of localization in cell;GO:003…
XR_216898.4	--	TCONS_00008047	EPHB5	0.975872	3.45e-05	NC_040049.1	33913044	33922295	-	NC_040046.1	122565480	122648839	-	--	EOB03603.1 Ephrin type-B receptor 5, partial [Anas platyrhynchos]	Organismal Systems	Development	ko04360//Axon guidance	K05111	GO:0044425//membrane part;GO:0016021//integral component of membrane;GO:0031224//intrinsic component of membrane;GO:0016020//membrane	GO:0016773//phosphotransferase activity, alcohol group as acceptor;GO:0004713//protein tyrosine kinase activity;GO:0019199//transmembrane receptor protein kinase activity;GO:0060089//molecular transducer activity;GO:0004872//receptor activity;GO:0032550//purine ribonucleoside binding;GO:0032549//ribonucleoside binding;GO:0099600//transmembrane receptor activity;GO:0005488//binding;GO:0003824//cat…	GO:0048878//chemical homeostasis;GO:0019538//protein metabolic process;GO:0050801//ion homeostasis;GO:0050886//endocrine process;GO:0006793//phosphorus metabolic process;GO:0055080//cation homeostasis;GO:0051234//establishment of localization;GO:0007165//signal transduction;GO:0009987//cellular process;GO:0044237//cellular metabolic process;GO:0051649//establishment of localization in cell;GO:003…
XR_002398686.2	--	TCONS_00008489	PDE3A	0.962624	0.000126901	NC_040049.1	14757614	14845465	-	NC_040046.1	134826773	134981056	-	--	XP_012952558.1 PREDICTED: cGMP-inhibited 3',5'-cyclic phosphodiesterase A isoform X3 [Anas platyrhynchos]	Environmental Information Processing;Organismal Systems;Metabolism;Human Diseases	Signal transduction;Nucleotide metabolism;Substance dependence;Endocrine system	ko04024//cAMP signaling pathway;ko04022//cGMP - PKG signaling pathway;ko00230//Purine metabolism;ko04924//Renin secretion;ko05032//Morphine addiction	K19021	-	-	-
TCONS_00008389	--	TCONS_00010027	GTSE1	0.988428	3.84e-06	NC_040046.1	129859216	129875551	-	NC_040046.1	187093778	187109880	-	--	XP_012959278.1 PREDICTED: G2 and S phase-expressed protein 1 isoform X2 [Anas platyrhynchos]	Cellular Processes	Cell growth and death	ko04115//p53 signaling pathway	K10129	-	-	-
TCONS_00023690	--	TCONS_00010027	GTSE1	0.980816	1.74e-05	NC_040049.1	7077553	7084395	+	NC_040046.1	187093778	187109880	-	--	XP_012959278.1 PREDICTED: G2 and S phase-expressed protein 1 isoform X2 [Anas platyrhynchos]	Cellular Processes	Cell growth and death	ko04115//p53 signaling pathway	K10129	-	-	-
TCONS_00023693	--	TCONS_00010027	GTSE1	0.959166	0.000165044	NC_040049.1	7085229	7088193	+	NC_040046.1	187093778	187109880	-	--	XP_012959278.1 PREDICTED: G2 and S phase-expressed protein 1 isoform X2 [Anas platyrhynchos]	Cellular Processes	Cell growth and death	ko04115//p53 signaling pathway	K10129	-	-	-
XR_002404603.2	--	TCONS_00010027	GTSE1	0.956981	0.000192662	NW_020865824.1	26310	33485	-	NC_040046.1	187093778	187109880	-	--	XP_012959278.1 PREDICTED: G2 and S phase-expressed protein 1 isoform X2 [Anas platyrhynchos]	Cellular Processes	Cell growth and death	ko04115//p53 signaling pathway	K10129	-	-	-
XR_003492443.1	--	TCONS_00010027	GTSE1	0.982148	1.4e-05	NC_040070.1	2110458	2150180	-	NC_040046.1	187093778	187109880	-	--	XP_012959278.1 PREDICTED: G2 and S phase-expressed protein 1 isoform X2 [Anas platyrhynchos]	Cellular Processes	Cell growth and death	ko04115//p53 signaling pathway	K10129	-	-	-
XR_003492494.1	--	TCONS_00010027	GTSE1	0.988459	3.81e-06	NC_040070.1	4732667	4879343	-	NC_040046.1	187093778	187109880	-	--	XP_012959278.1 PREDICTED: G2 and S phase-expressed protein 1 isoform X2 [Anas platyrhynchos]	Cellular Processes	Cell growth and death	ko04115//p53 signaling pathway	K10129	-	-	-
XR_003493829.1	--	TCONS_00010027	GTSE1	0.966848	8.88e-05	NW_020865675.1	36803	38302	+	NC_040046.1	187093778	187109880	-	--	XP_012959278.1 PREDICTED: G2 and S phase-expressed protein 1 isoform X2 [Anas platyrhynchos]	Cellular Processes	Cell growth and death	ko04115//p53 signaling pathway	K10129	-	-	-
XR_003496080.1	--	TCONS_00010027	GTSE1	0.961212	0.000141679	NC_040048.1	13579017	13583395	-	NC_040046.1	187093778	187109880	-	--	XP_012959278.1 PREDICTED: G2 and S phase-expressed protein 1 isoform X2 [Anas platyrhynchos]	Cellular Processes	Cell growth and death	ko04115//p53 signaling pathway	K10129	-	-	-
TCONS_00033547	--	TCONS_00010043	KIF21A	0.987619	4.7e-06	NC_040051.1	26275893	26278921	+	NC_040046.1	187399897	187487569	-	--	XP_015707161.1 PREDICTED: kinesin-like protein KIF21A isoform X8 [Coturnix japonica]	-	-	-	-	-	-	-
TCONS_00066780	--	TCONS_00010043	KIF21A	0.950719	0.000288269	NC_040075.1	21803501	21845876	+	NC_040046.1	187399897	187487569	-	--	XP_015707161.1 PREDICTED: kinesin-like protein KIF21A isoform X8 [Coturnix japonica]	-	-	-	-	-	-	-
XR_002404149.2	--	TCONS_00013736	ADCYAP1R1	0.967852	8.11e-05	NC_040049.1	75102297	75111170	+	NC_040047.1	3365712	3507415	-	--	XP_005023293.1 PREDICTED: pituitary adenylate cyclase-activating polypeptide type I receptor isoform X6 [Anas platyrhynchos]	Organismal Systems;Environmental Information Processing	Signaling molecules and interaction;Signal transduction;Environmental adaptation;Endocrine system	ko04080//Neuroactive ligand-receptor interaction;ko04024//cAMP signaling pathway;ko04713//Circadian entrainment;ko04911//Insulin secretion;ko04924//Renin secretion	K04587	GO:0044425//membrane part;GO:0016020//membrane;GO:0031224//intrinsic component of membrane;GO:0032991//macromolecular complex;GO:0043234//protein complex	GO:0004872//receptor activity;GO:0060089//molecular transducer activity;GO:0099600//transmembrane receptor activity;GO:0004930//G-protein coupled receptor activity;GO:0038023//signaling receptor activity;GO:0004888//transmembrane signaling receptor activity;GO:0004871//signal transducer activity	GO:0050794//regulation of cellular process;GO:0051716//cellular response to stimulus;GO:0007154//cell communication;GO:0044763//single-organism cellular process;GO:0007165//signal transduction;GO:0044699//single-organism process;GO:0023052//signaling;GO:0065007//biological regulation;GO:0050789//regulation of biological process;GO:0050896//response to stimulus;GO:0044700//single organism signalin…
XR_002404603.2	--	TCONS_00013736	ADCYAP1R1	0.971629	5.59e-05	NW_020865824.1	26310	33485	-	NC_040047.1	3365712	3507415	-	--	XP_005023293.1 PREDICTED: pituitary adenylate cyclase-activating polypeptide type I receptor isoform X6 [Anas platyrhynchos]	Organismal Systems;Environmental Information Processing	Signaling molecules and interaction;Signal transduction;Environmental adaptation;Endocrine system	ko04080//Neuroactive ligand-receptor interaction;ko04024//cAMP signaling pathway;ko04713//Circadian entrainment;ko04911//Insulin secretion;ko04924//Renin secretion	K04587	GO:0044425//membrane part;GO:0016020//membrane;GO:0031224//intrinsic component of membrane;GO:0032991//macromolecular complex;GO:0043234//protein complex	GO:0004872//receptor activity;GO:0060089//molecular transducer activity;GO:0099600//transmembrane receptor activity;GO:0004930//G-protein coupled receptor activity;GO:0038023//signaling receptor activity;GO:0004888//transmembrane signaling receptor activity;GO:0004871//signal transducer activity	GO:0050794//regulation of cellular process;GO:0051716//cellular response to stimulus;GO:0007154//cell communication;GO:0044763//single-organism cellular process;GO:0007165//signal transduction;GO:0044699//single-organism process;GO:0023052//signaling;GO:0065007//biological regulation;GO:0050789//regulation of biological process;GO:0050896//response to stimulus;GO:0044700//single organism signalin…
XR_003494933.1	--	TCONS_00013736	ADCYAP1R1	0.956563	0.000198272	NC_040046.1	122057549	122059719	+	NC_040047.1	3365712	3507415	-	--	XP_005023293.1 PREDICTED: pituitary adenylate cyclase-activating polypeptide type I receptor isoform X6 [Anas platyrhynchos]	Organismal Systems;Environmental Information Processing	Signaling molecules and interaction;Signal transduction;Environmental adaptation;Endocrine system	ko04080//Neuroactive ligand-receptor interaction;ko04024//cAMP signaling pathway;ko04713//Circadian entrainment;ko04911//Insulin secretion;ko04924//Renin secretion	K04587	GO:0044425//membrane part;GO:0016020//membrane;GO:0031224//intrinsic component of membrane;GO:0032991//macromolecular complex;GO:0043234//protein complex	GO:0004872//receptor activity;GO:0060089//molecular transducer activity;GO:0099600//transmembrane receptor activity;GO:0004930//G-protein coupled receptor activity;GO:0038023//signaling receptor activity;GO:0004888//transmembrane signaling receptor activity;GO:0004871//signal transducer activity	GO:0050794//regulation of cellular process;GO:0051716//cellular response to stimulus;GO:0007154//cell communication;GO:0044763//single-organism cellular process;GO:0007165//signal transduction;GO:0044699//single-organism process;GO:0023052//signaling;GO:0065007//biological regulation;GO:0050789//regulation of biological process;GO:0050896//response to stimulus;GO:0044700//single organism signalin…
TCONS_00008389	--	TCONS_00014318	THSD7A	0.955571	0.000212013	NC_040046.1	129859216	129875551	-	NC_040047.1	28204496	28478449	-	--	XP_005015166.1 PREDICTED: thrombospondin type-1 domain-containing protein 7A isoform X2 [Anas platyrhynchos]	-	-	-	-	-	-	-
XR_002403108.2	--	TCONS_00014318	THSD7A	0.989561	2.82e-06	NC_040046.1	131993181	132020617	+	NC_040047.1	28204496	28478449	-	--	XP_005015166.1 PREDICTED: thrombospondin type-1 domain-containing protein 7A isoform X2 [Anas platyrhynchos]	-	-	-	-	-	-	-
XR_003492494.1	--	TCONS_00014318	THSD7A	0.958794	0.000169546	NC_040070.1	4732667	4879343	-	NC_040047.1	28204496	28478449	-	--	XP_005015166.1 PREDICTED: thrombospondin type-1 domain-containing protein 7A isoform X2 [Anas platyrhynchos]	-	-	-	-	-	-	-
XR_217450.4	--	TCONS_00014369	ispd	0.967216	8.59e-05	NC_040063.1	2714704	2717526	-	NC_040047.1	30372158	30497012	-	--	XP_011583892.1 PREDICTED: isoprenoid synthase domain-containing protein isoform X1 [Aquila chrysaetos canadensis]	-	-	-	-	-	-	GO:0070085//glycosylation;GO:0048869//cellular developmental process;GO:0048856//anatomical structure development;GO:0006928//movement of cell or subcellular component;GO:0005975//carbohydrate metabolic process;GO:0006935//chemotaxis;GO:0030154//cell differentiation;GO:0030030//cell projection organization;GO:0009058//biosynthetic process;GO:0000902//cell morphogenesis;GO:0007275//multicellular o…
XR_003492281.1	--	TCONS_00014657	THRB	0.956975	0.00019274	NC_040067.1	5046934	5067932	-	NC_040047.1	39788059	39843221	-	--	XP_014458503.1 PREDICTED: thyroid hormone receptor beta isoform X2 [Alligator mississippiensis]	Environmental Information Processing;Organismal Systems	Signaling molecules and interaction;Endocrine system	ko04080//Neuroactive ligand-receptor interaction;ko04919//Thyroid hormone signaling pathway	K08362	GO:0043231//intracellular membrane-bounded organelle;GO:0043227//membrane-bounded organelle;GO:0005623//cell;GO:0044446//intracellular organelle part;GO:0031988//membrane-bounded vesicle;GO:0044422//organelle part;GO:0000785//chromatin;GO:0031982//vesicle;GO:0043229//intracellular organelle;GO:0044424//intracellular part;GO:0005694//chromosome;GO:0043232//intracellular non-membrane-bounded organe…	GO:0004879//RNA polymerase II transcription factor activity, ligand-activated sequence-specific DNA binding;GO:0003676//nucleic acid binding;GO:0005488//binding;GO:0004871//signal transducer activity;GO:0005515//protein binding;GO:0042562//hormone binding;GO:0046872//metal ion binding;GO:0044877//macromolecular complex binding;GO:0043167//ion binding;GO:0003700//transcription factor activity, seq…	GO:1903506//regulation of nucleic acid-templated transcription;GO:0019219//regulation of nucleobase-containing compound metabolic process;GO:2000112//regulation of cellular macromolecule biosynthetic process;GO:0051171//regulation of nitrogen compound metabolic process;GO:0044700//single organism signaling;GO:0051239//regulation of multicellular organismal process;GO:0035295//tube development;GO:…
XR_003493025.1	--	TCONS_00014657	THRB	0.971592	5.61e-05	NC_040075.1	85099	88781	+	NC_040047.1	39788059	39843221	-	--	XP_014458503.1 PREDICTED: thyroid hormone receptor beta isoform X2 [Alligator mississippiensis]	Environmental Information Processing;Organismal Systems	Signaling molecules and interaction;Endocrine system	ko04080//Neuroactive ligand-receptor interaction;ko04919//Thyroid hormone signaling pathway	K08362	GO:0043231//intracellular membrane-bounded organelle;GO:0043227//membrane-bounded organelle;GO:0005623//cell;GO:0044446//intracellular organelle part;GO:0031988//membrane-bounded vesicle;GO:0044422//organelle part;GO:0000785//chromatin;GO:0031982//vesicle;GO:0043229//intracellular organelle;GO:0044424//intracellular part;GO:0005694//chromosome;GO:0043232//intracellular non-membrane-bounded organe…	GO:0004879//RNA polymerase II transcription factor activity, ligand-activated sequence-specific DNA binding;GO:0003676//nucleic acid binding;GO:0005488//binding;GO:0004871//signal transducer activity;GO:0005515//protein binding;GO:0042562//hormone binding;GO:0046872//metal ion binding;GO:0044877//macromolecular complex binding;GO:0043167//ion binding;GO:0003700//transcription factor activity, seq…	GO:1903506//regulation of nucleic acid-templated transcription;GO:0019219//regulation of nucleobase-containing compound metabolic process;GO:2000112//regulation of cellular macromolecule biosynthetic process;GO:0051171//regulation of nitrogen compound metabolic process;GO:0044700//single organism signaling;GO:0051239//regulation of multicellular organismal process;GO:0035295//tube development;GO:…
TCONS_00008389	--	TCONS_00015282	Clasp2	0.978251	2.53e-05	NC_040046.1	129859216	129875551	-	NC_040047.1	64617736	64713551	-	--	XP_012950186.1 PREDICTED: CLIP-associating protein 2 isoform X2 [Anas platyrhynchos]	-	-	-	-	-	-	-
TCONS_00011835	--	TCONS_00015282	Clasp2	0.953009	0.000250347	NC_040047.1	57408380	57409820	+	NC_040047.1	64617736	64713551	-	--	XP_012950186.1 PREDICTED: CLIP-associating protein 2 isoform X2 [Anas platyrhynchos]	-	-	-	-	-	-	-
TCONS_00023690	--	TCONS_00015282	Clasp2	0.995144	2.85e-07	NC_040049.1	7077553	7084395	+	NC_040047.1	64617736	64713551	-	--	XP_012950186.1 PREDICTED: CLIP-associating protein 2 isoform X2 [Anas platyrhynchos]	-	-	-	-	-	-	-
TCONS_00023693	--	TCONS_00015282	Clasp2	0.964498	0.000108908	NC_040049.1	7085229	7088193	+	NC_040047.1	64617736	64713551	-	--	XP_012950186.1 PREDICTED: CLIP-associating protein 2 isoform X2 [Anas platyrhynchos]	-	-	-	-	-	-	-
TCONS_00036158	--	TCONS_00015282	Clasp2	0.991186	1.7e-06	NC_040052.1	20755631	21004507	+	NC_040047.1	64617736	64713551	-	--	XP_012950186.1 PREDICTED: CLIP-associating protein 2 isoform X2 [Anas platyrhynchos]	-	-	-	-	-	-	-
TCONS_00043935	--	TCONS_00015282	Clasp2	0.958669	0.00017108	NC_040055.1	7229449	7260389	+	NC_040047.1	64617736	64713551	-	--	XP_012950186.1 PREDICTED: CLIP-associating protein 2 isoform X2 [Anas platyrhynchos]	-	-	-	-	-	-	-
TCONS_00061153	--	TCONS_00015282	Clasp2	0.952352	0.000260868	NC_040067.1	4282222	4303667	+	NC_040047.1	64617736	64713551	-	--	XP_012950186.1 PREDICTED: CLIP-associating protein 2 isoform X2 [Anas platyrhynchos]	-	-	-	-	-	-	-
XR_002399829.2	--	TCONS_00015282	Clasp2	0.964776	0.000106394	NC_040047.1	56461086	56480714	+	NC_040047.1	64617736	64713551	-	--	XP_012950186.1 PREDICTED: CLIP-associating protein 2 isoform X2 [Anas platyrhynchos]	-	-	-	-	-	-	-
XR_003492443.1	--	TCONS_00015282	Clasp2	0.967609	8.29e-05	NC_040070.1	2110458	2150180	-	NC_040047.1	64617736	64713551	-	--	XP_012950186.1 PREDICTED: CLIP-associating protein 2 isoform X2 [Anas platyrhynchos]	-	-	-	-	-	-	-
XR_003492494.1	--	TCONS_00015282	Clasp2	0.976024	3.38e-05	NC_040070.1	4732667	4879343	-	NC_040047.1	64617736	64713551	-	--	XP_012950186.1 PREDICTED: CLIP-associating protein 2 isoform X2 [Anas platyrhynchos]	-	-	-	-	-	-	-
XR_003493829.1	--	TCONS_00015282	Clasp2	0.973152	4.74e-05	NW_020865675.1	36803	38302	+	NC_040047.1	64617736	64713551	-	--	XP_012950186.1 PREDICTED: CLIP-associating protein 2 isoform X2 [Anas platyrhynchos]	-	-	-	-	-	-	-
XR_003497509.1	--	TCONS_00015282	Clasp2	0.969122	7.19e-05	NC_040050.1	61187374	61379338	-	NC_040047.1	64617736	64713551	-	--	XP_012950186.1 PREDICTED: CLIP-associating protein 2 isoform X2 [Anas platyrhynchos]	-	-	-	-	-	-	-
XR_003498432.1	--	TCONS_00015282	Clasp2	0.952051	0.000265776	NC_040052.1	15282755	15317050	-	NC_040047.1	64617736	64713551	-	--	XP_012950186.1 PREDICTED: CLIP-associating protein 2 isoform X2 [Anas platyrhynchos]	-	-	-	-	-	-	-
XR_003493526.1	--	TCONS_00015815	MOCOS	0.997343	4.68e-08	NW_020865430.1	17201	38801	-	NC_040047.1	89044908	89263313	-	--	XP_005024946.1 PREDICTED: molybdenum cofactor sulfurase isoform X1 [Anas platyrhynchos]	Metabolism	Metabolism of cofactors and vitamins	ko00790//Folate biosynthesis	K15631	-	GO:0043169//cation binding;GO:0043167//ion binding;GO:0005488//binding;GO:0003824//catalytic activity;GO:0043168//anion binding;GO:0046872//metal ion binding;GO:0046914//transition metal ion binding	GO:0009108//coenzyme biosynthetic process;GO:0044249//cellular biosynthetic process;GO:0009058//biosynthetic process;GO:0051186//cofactor metabolic process;GO:0051188//cofactor biosynthetic process;GO:0008152//metabolic process;GO:0006732//coenzyme metabolic process;GO:0009987//cellular process;GO:0044237//cellular metabolic process
XR_003499836.1	--	TCONS_00015815	MOCOS	0.955769	0.000209224	NC_040056.1	3094422	3101020	+	NC_040047.1	89044908	89263313	-	--	XP_005024946.1 PREDICTED: molybdenum cofactor sulfurase isoform X1 [Anas platyrhynchos]	Metabolism	Metabolism of cofactors and vitamins	ko00790//Folate biosynthesis	K15631	-	GO:0043169//cation binding;GO:0043167//ion binding;GO:0005488//binding;GO:0003824//catalytic activity;GO:0043168//anion binding;GO:0046872//metal ion binding;GO:0046914//transition metal ion binding	GO:0009108//coenzyme biosynthetic process;GO:0044249//cellular biosynthetic process;GO:0009058//biosynthetic process;GO:0051186//cofactor metabolic process;GO:0051188//cofactor biosynthetic process;GO:0008152//metabolic process;GO:0006732//coenzyme metabolic process;GO:0009987//cellular process;GO:0044237//cellular metabolic process
XR_001194425.3	--	TCONS_00015831	Lpcat1	0.968051	7.96e-05	NC_040060.1	17207203	17319182	+	NC_040047.1	90058473	90111972	-	--	EOA93147.1 1-acylglycerophosphocholine O-acyltransferase 1, partial [Anas platyrhynchos]	Metabolism	Lipid metabolism;Global and overview maps	ko01100//Metabolic pathways;ko00564//Glycerophospholipid metabolism;ko00565//Ether lipid metabolism	K13510	-	-	-
TCONS_00038080	--	TCONS_00016009	LAMA3	0.977566	2.78e-05	NC_040052.1	28830732	28842721	-	NC_040047.1	102073308	102131473	-	--	XP_012950585.1 PREDICTED: laminin subunit alpha-3 [Anas platyrhynchos]	Environmental Information Processing;Cellular Processes;Human Diseases;Metabolism	Global and overview maps;Infectious diseases;Cancers;Cellular community - eukaryotes;Signaling molecules and interaction;Signal transduction	ko01100//Metabolic pathways;ko05200//Pathways in cancer;ko05165//Human papillomavirus infection;ko04151//PI3K-Akt signaling pathway;ko04510//Focal adhesion;ko04512//ECM-receptor interaction;ko05145//Toxoplasmosis;ko05222//Small cell lung cancer;ko05146//Amoebiasis	K06240	GO:0044421//extracellular region part;GO:0043234//protein complex;GO:0043227//membrane-bounded organelle;GO:0005578//proteinaceous extracellular matrix;GO:0031988//membrane-bounded vesicle;GO:0031982//vesicle;GO:0044420//extracellular matrix component;GO:0043226//organelle;GO:0005605//basal lamina;GO:0005576//extracellular region;GO:0031012//extracellular matrix;GO:0005604//basement membrane;GO:0…	-	GO:0040011//locomotion;GO:0007155//cell adhesion;GO:0050789//regulation of biological process;GO:0044699//single-organism process;GO:0022610//biological adhesion;GO:0048870//cell motility;GO:0051674//localization of cell;GO:0016477//cell migration;GO:0044767//single-organism developmental process;GO:0032502//developmental process;GO:0050793//regulation of developmental process;GO:0065007//biologi…
XR_001190174.3	--	TCONS_00016009	LAMA3	0.977594	2.77e-05	NC_040050.1	57161753	57238119	-	NC_040047.1	102073308	102131473	-	--	XP_012950585.1 PREDICTED: laminin subunit alpha-3 [Anas platyrhynchos]	Environmental Information Processing;Cellular Processes;Human Diseases;Metabolism	Global and overview maps;Infectious diseases;Cancers;Cellular community - eukaryotes;Signaling molecules and interaction;Signal transduction	ko01100//Metabolic pathways;ko05200//Pathways in cancer;ko05165//Human papillomavirus infection;ko04151//PI3K-Akt signaling pathway;ko04510//Focal adhesion;ko04512//ECM-receptor interaction;ko05145//Toxoplasmosis;ko05222//Small cell lung cancer;ko05146//Amoebiasis	K06240	GO:0044421//extracellular region part;GO:0043234//protein complex;GO:0043227//membrane-bounded organelle;GO:0005578//proteinaceous extracellular matrix;GO:0031988//membrane-bounded vesicle;GO:0031982//vesicle;GO:0044420//extracellular matrix component;GO:0043226//organelle;GO:0005605//basal lamina;GO:0005576//extracellular region;GO:0031012//extracellular matrix;GO:0005604//basement membrane;GO:0…	-	GO:0040011//locomotion;GO:0007155//cell adhesion;GO:0050789//regulation of biological process;GO:0044699//single-organism process;GO:0022610//biological adhesion;GO:0048870//cell motility;GO:0051674//localization of cell;GO:0016477//cell migration;GO:0044767//single-organism developmental process;GO:0032502//developmental process;GO:0050793//regulation of developmental process;GO:0065007//biologi…
XR_003492471.1	--	TCONS_00016009	LAMA3	0.953123	0.000248551	NC_040070.1	5689370	5692142	-	NC_040047.1	102073308	102131473	-	--	XP_012950585.1 PREDICTED: laminin subunit alpha-3 [Anas platyrhynchos]	Environmental Information Processing;Cellular Processes;Human Diseases;Metabolism	Global and overview maps;Infectious diseases;Cancers;Cellular community - eukaryotes;Signaling molecules and interaction;Signal transduction	ko01100//Metabolic pathways;ko05200//Pathways in cancer;ko05165//Human papillomavirus infection;ko04151//PI3K-Akt signaling pathway;ko04510//Focal adhesion;ko04512//ECM-receptor interaction;ko05145//Toxoplasmosis;ko05222//Small cell lung cancer;ko05146//Amoebiasis	K06240	GO:0044421//extracellular region part;GO:0043234//protein complex;GO:0043227//membrane-bounded organelle;GO:0005578//proteinaceous extracellular matrix;GO:0031988//membrane-bounded vesicle;GO:0031982//vesicle;GO:0044420//extracellular matrix component;GO:0043226//organelle;GO:0005605//basal lamina;GO:0005576//extracellular region;GO:0031012//extracellular matrix;GO:0005604//basement membrane;GO:0…	-	GO:0040011//locomotion;GO:0007155//cell adhesion;GO:0050789//regulation of biological process;GO:0044699//single-organism process;GO:0022610//biological adhesion;GO:0048870//cell motility;GO:0051674//localization of cell;GO:0016477//cell migration;GO:0044767//single-organism developmental process;GO:0032502//developmental process;GO:0050793//regulation of developmental process;GO:0065007//biologi…
XR_003500049.1	--	TCONS_00016047	GREB1L	0.952935	0.000251524	NC_040057.1	4222351	4229255	+	NC_040047.1	102905645	103032077	-	--	XP_012950420.1 PREDICTED: GREB1-like protein isoform X6 [Anas platyrhynchos]	-	-	-	-	-	-	-
TCONS_00041892	--	TCONS_00016587	IMPA1	0.973406	4.61e-05	NC_040054.1	10486383	10510102	+	NC_040047.1	127436834	127448865	-	--	XP_013027863.1 PREDICTED: inositol monophosphatase 1 isoform X1 [Anser cygnoides domesticus]	Environmental Information Processing;Metabolism	Global and overview maps;Carbohydrate metabolism;Signal transduction	ko01100//Metabolic pathways;ko04070//Phosphatidylinositol signaling system;ko00562//Inositol phosphate metabolism	K01092	GO:0044424//intracellular part;GO:0044464//cell part;GO:0031982//vesicle;GO:0043226//organelle;GO:0005623//cell;GO:0031988//membrane-bounded vesicle;GO:0043227//membrane-bounded organelle;GO:0005622//intracellular	GO:0043169//cation binding;GO:0043167//ion binding;GO:0005515//protein binding;GO:0046872//metal ion binding;GO:0005488//binding;GO:0003824//catalytic activity;GO:0046914//transition metal ion binding;GO:0052834//inositol monophosphate phosphatase activity;GO:0016788//hydrolase activity, acting on ester bonds;GO:0052745//inositol phosphate phosphatase activity;GO:0016787//hydrolase activity;GO:00…	GO:0019637//organophosphate metabolic process;GO:0009058//biosynthetic process;GO:0006796//phosphate-containing compound metabolic process;GO:0046486//glycerolipid metabolic process;GO:0045017//glycerolipid biosynthetic process;GO:0050794//regulation of cellular process;GO:0009987//cellular process;GO:0044255//cellular lipid metabolic process;GO:0006793//phosphorus metabolic process;GO:0044238//p…
XR_001188103.2	--	TCONS_00016587	IMPA1	0.952249	0.000262544	NC_040051.1	25689118	25695910	+	NC_040047.1	127436834	127448865	-	--	XP_013027863.1 PREDICTED: inositol monophosphatase 1 isoform X1 [Anser cygnoides domesticus]	Environmental Information Processing;Metabolism	Global and overview maps;Carbohydrate metabolism;Signal transduction	ko01100//Metabolic pathways;ko04070//Phosphatidylinositol signaling system;ko00562//Inositol phosphate metabolism	K01092	GO:0044424//intracellular part;GO:0044464//cell part;GO:0031982//vesicle;GO:0043226//organelle;GO:0005623//cell;GO:0031988//membrane-bounded vesicle;GO:0043227//membrane-bounded organelle;GO:0005622//intracellular	GO:0043169//cation binding;GO:0043167//ion binding;GO:0005515//protein binding;GO:0046872//metal ion binding;GO:0005488//binding;GO:0003824//catalytic activity;GO:0046914//transition metal ion binding;GO:0052834//inositol monophosphate phosphatase activity;GO:0016788//hydrolase activity, acting on ester bonds;GO:0052745//inositol phosphate phosphatase activity;GO:0016787//hydrolase activity;GO:00…	GO:0019637//organophosphate metabolic process;GO:0009058//biosynthetic process;GO:0006796//phosphate-containing compound metabolic process;GO:0046486//glycerolipid metabolic process;GO:0045017//glycerolipid biosynthetic process;GO:0050794//regulation of cellular process;GO:0009987//cellular process;GO:0044255//cellular lipid metabolic process;GO:0006793//phosphorus metabolic process;GO:0044238//p…
XR_002401731.2	--	TCONS_00016587	IMPA1	0.988424	3.84e-06	NC_040053.1	35192537	35197417	+	NC_040047.1	127436834	127448865	-	--	XP_013027863.1 PREDICTED: inositol monophosphatase 1 isoform X1 [Anser cygnoides domesticus]	Environmental Information Processing;Metabolism	Global and overview maps;Carbohydrate metabolism;Signal transduction	ko01100//Metabolic pathways;ko04070//Phosphatidylinositol signaling system;ko00562//Inositol phosphate metabolism	K01092	GO:0044424//intracellular part;GO:0044464//cell part;GO:0031982//vesicle;GO:0043226//organelle;GO:0005623//cell;GO:0031988//membrane-bounded vesicle;GO:0043227//membrane-bounded organelle;GO:0005622//intracellular	GO:0043169//cation binding;GO:0043167//ion binding;GO:0005515//protein binding;GO:0046872//metal ion binding;GO:0005488//binding;GO:0003824//catalytic activity;GO:0046914//transition metal ion binding;GO:0052834//inositol monophosphate phosphatase activity;GO:0016788//hydrolase activity, acting on ester bonds;GO:0052745//inositol phosphate phosphatase activity;GO:0016787//hydrolase activity;GO:00…	GO:0019637//organophosphate metabolic process;GO:0009058//biosynthetic process;GO:0006796//phosphate-containing compound metabolic process;GO:0046486//glycerolipid metabolic process;GO:0045017//glycerolipid biosynthetic process;GO:0050794//regulation of cellular process;GO:0009987//cellular process;GO:0044255//cellular lipid metabolic process;GO:0006793//phosphorus metabolic process;GO:0044238//p…
XR_003497753.1	--	TCONS_00016587	IMPA1	0.993167	7.93e-07	NC_040050.1	5582146	5595688	-	NC_040047.1	127436834	127448865	-	--	XP_013027863.1 PREDICTED: inositol monophosphatase 1 isoform X1 [Anser cygnoides domesticus]	Environmental Information Processing;Metabolism	Global and overview maps;Carbohydrate metabolism;Signal transduction	ko01100//Metabolic pathways;ko04070//Phosphatidylinositol signaling system;ko00562//Inositol phosphate metabolism	K01092	GO:0044424//intracellular part;GO:0044464//cell part;GO:0031982//vesicle;GO:0043226//organelle;GO:0005623//cell;GO:0031988//membrane-bounded vesicle;GO:0043227//membrane-bounded organelle;GO:0005622//intracellular	GO:0043169//cation binding;GO:0043167//ion binding;GO:0005515//protein binding;GO:0046872//metal ion binding;GO:0005488//binding;GO:0003824//catalytic activity;GO:0046914//transition metal ion binding;GO:0052834//inositol monophosphate phosphatase activity;GO:0016788//hydrolase activity, acting on ester bonds;GO:0052745//inositol phosphate phosphatase activity;GO:0016787//hydrolase activity;GO:00…	GO:0019637//organophosphate metabolic process;GO:0009058//biosynthetic process;GO:0006796//phosphate-containing compound metabolic process;GO:0046486//glycerolipid metabolic process;GO:0045017//glycerolipid biosynthetic process;GO:0050794//regulation of cellular process;GO:0009987//cellular process;GO:0044255//cellular lipid metabolic process;GO:0006793//phosphorus metabolic process;GO:0044238//p…
XR_003497934.1	--	TCONS_00016587	IMPA1	0.993425	7.07e-07	NC_040051.1	26348029	26575846	+	NC_040047.1	127436834	127448865	-	--	XP_013027863.1 PREDICTED: inositol monophosphatase 1 isoform X1 [Anser cygnoides domesticus]	Environmental Information Processing;Metabolism	Global and overview maps;Carbohydrate metabolism;Signal transduction	ko01100//Metabolic pathways;ko04070//Phosphatidylinositol signaling system;ko00562//Inositol phosphate metabolism	K01092	GO:0044424//intracellular part;GO:0044464//cell part;GO:0031982//vesicle;GO:0043226//organelle;GO:0005623//cell;GO:0031988//membrane-bounded vesicle;GO:0043227//membrane-bounded organelle;GO:0005622//intracellular	GO:0043169//cation binding;GO:0043167//ion binding;GO:0005515//protein binding;GO:0046872//metal ion binding;GO:0005488//binding;GO:0003824//catalytic activity;GO:0046914//transition metal ion binding;GO:0052834//inositol monophosphate phosphatase activity;GO:0016788//hydrolase activity, acting on ester bonds;GO:0052745//inositol phosphate phosphatase activity;GO:0016787//hydrolase activity;GO:00…	GO:0019637//organophosphate metabolic process;GO:0009058//biosynthetic process;GO:0006796//phosphate-containing compound metabolic process;GO:0046486//glycerolipid metabolic process;GO:0045017//glycerolipid biosynthetic process;GO:0050794//regulation of cellular process;GO:0009987//cellular process;GO:0044255//cellular lipid metabolic process;GO:0006793//phosphorus metabolic process;GO:0044238//p…
XR_003501057.1	--	TCONS_00016587	IMPA1	0.956902	0.000193719	NC_040063.1	8275910	8287160	-	NC_040047.1	127436834	127448865	-	--	XP_013027863.1 PREDICTED: inositol monophosphatase 1 isoform X1 [Anser cygnoides domesticus]	Environmental Information Processing;Metabolism	Global and overview maps;Carbohydrate metabolism;Signal transduction	ko01100//Metabolic pathways;ko04070//Phosphatidylinositol signaling system;ko00562//Inositol phosphate metabolism	K01092	GO:0044424//intracellular part;GO:0044464//cell part;GO:0031982//vesicle;GO:0043226//organelle;GO:0005623//cell;GO:0031988//membrane-bounded vesicle;GO:0043227//membrane-bounded organelle;GO:0005622//intracellular	GO:0043169//cation binding;GO:0043167//ion binding;GO:0005515//protein binding;GO:0046872//metal ion binding;GO:0005488//binding;GO:0003824//catalytic activity;GO:0046914//transition metal ion binding;GO:0052834//inositol monophosphate phosphatase activity;GO:0016788//hydrolase activity, acting on ester bonds;GO:0052745//inositol phosphate phosphatase activity;GO:0016787//hydrolase activity;GO:00…	GO:0019637//organophosphate metabolic process;GO:0009058//biosynthetic process;GO:0006796//phosphate-containing compound metabolic process;GO:0046486//glycerolipid metabolic process;GO:0045017//glycerolipid biosynthetic process;GO:0050794//regulation of cellular process;GO:0009987//cellular process;GO:0044255//cellular lipid metabolic process;GO:0006793//phosphorus metabolic process;GO:0044238//p…
XR_002400752.2	--	TCONS_00016795	Azin1	-0.958177	0.000177204	NC_040052.1	18669420	18701866	-	NC_040047.1	135474518	135500585	-	--	NP_001278507.1 antizyme inhibitor 1 [Anas platyrhynchos]	-	-	-	-	GO:0043231//intracellular membrane-bounded organelle;GO:0044424//intracellular part;GO:0005623//cell;GO:0005622//intracellular;GO:0043226//organelle;GO:0043229//intracellular organelle;GO:0044464//cell part;GO:0043227//membrane-bounded organelle	GO:0030234//enzyme regulator activity;GO:0098772//molecular function regulator;GO:0008047//enzyme activator activity	GO:0009893//positive regulation of metabolic process;GO:0044106//cellular amine metabolic process;GO:0034764//positive regulation of transmembrane transport;GO:0048518//positive regulation of biological process;GO:0050789//regulation of biological process;GO:0009892//negative regulation of metabolic process;GO:0048519//negative regulation of biological process;GO:0051049//regulation of transport;…
XR_003493925.1	--	TCONS_00017212	PLEC	0.954136	0.000232966	NW_020865859.1	109561	113812	+	NC_040047.1	155652985	155677140	-	--	XP_010565091.1 PREDICTED: plectin-like isoform X1 [Haliaeetus leucocephalus]	-	-	-	-	GO:0030016//myofibril;GO:0005622//intracellular;GO:0044464//cell part;GO:0044424//intracellular part;GO:0031982//vesicle;GO:0030054//cell junction;GO:0005924//cell-substrate adherens junction;GO:0043229//intracellular organelle;GO:0030055//cell-substrate junction;GO:0005856//cytoskeleton;GO:0005886//plasma membrane;GO:0043227//membrane-bounded organelle;GO:0005912//adherens junction;GO:0016020//m…	GO:0097159//organic cyclic compound binding;GO:0003723//RNA binding;GO:0005198//structural molecule activity;GO:0003676//nucleic acid binding;GO:0008092//cytoskeletal protein binding;GO:1901363//heterocyclic compound binding;GO:0005515//protein binding;GO:0005488//binding	GO:0009987//cellular process;GO:0008219//cell death;GO:0044699//single-organism process;GO:0016043//cellular component organization;GO:0044085//cellular component biogenesis;GO:0016265//death;GO:0044763//single-organism cellular process;GO:0034329//cell junction assembly;GO:0043062//extracellular structure organization;GO:0034330//cell junction organization;GO:0022411//cellular component disassem…
XR_002398923.2	--	TCONS_00017591	PROKR1	-0.974173	4.22e-05	NC_040064.1	849539	901316	-	NC_040048.1	9911730	9919834	+	--	XP_009632965.1 PREDICTED: prokineticin receptor 2 [Egretta garzetta]	-	-	-	-	GO:0044425//membrane part;GO:0031224//intrinsic component of membrane;GO:0016020//membrane	GO:0004872//receptor activity;GO:0004888//transmembrane signaling receptor activity;GO:0060089//molecular transducer activity;GO:0004871//signal transducer activity;GO:0038023//signaling receptor activity;GO:0099600//transmembrane receptor activity	GO:0007154//cell communication;GO:0050794//regulation of cellular process;GO:0023052//signaling;GO:0007186//G-protein coupled receptor signaling pathway;GO:0007165//signal transduction;GO:0050789//regulation of biological process;GO:0044699//single-organism process;GO:0051716//cellular response to stimulus;GO:0044700//single organism signaling;GO:0044763//single-organism cellular process;GO:00508…
XR_003492889.1	--	TCONS_00017591	PROKR1	0.973849	4.38e-05	NC_040075.1	23733618	23740832	+	NC_040048.1	9911730	9919834	+	--	XP_009632965.1 PREDICTED: prokineticin receptor 2 [Egretta garzetta]	-	-	-	-	GO:0044425//membrane part;GO:0031224//intrinsic component of membrane;GO:0016020//membrane	GO:0004872//receptor activity;GO:0004888//transmembrane signaling receptor activity;GO:0060089//molecular transducer activity;GO:0004871//signal transducer activity;GO:0038023//signaling receptor activity;GO:0099600//transmembrane receptor activity	GO:0007154//cell communication;GO:0050794//regulation of cellular process;GO:0023052//signaling;GO:0007186//G-protein coupled receptor signaling pathway;GO:0007165//signal transduction;GO:0050789//regulation of biological process;GO:0044699//single-organism process;GO:0051716//cellular response to stimulus;GO:0044700//single organism signaling;GO:0044763//single-organism cellular process;GO:00508…
TCONS_00027847	--	TCONS_00019138	PTPRK	0.962849	0.000124642	NC_040049.1	70309937	70330318	-	NC_040048.1	61765294	62181197	+	--	XP_015714004.1 PREDICTED: receptor-type tyrosine-protein phosphatase kappa isoform X10 [Coturnix japonica]	-	-	-	-	-	-	-
XR_003500093.1	--	TCONS_00019138	PTPRK	0.957251	0.000189105	NC_040057.1	12378042	12386253	-	NC_040048.1	61765294	62181197	+	--	XP_015714004.1 PREDICTED: receptor-type tyrosine-protein phosphatase kappa isoform X10 [Coturnix japonica]	-	-	-	-	-	-	-
XR_003500673.1	--	TCONS_00019138	PTPRK	0.962221	0.000131012	NC_040060.1	6859412	7037567	-	NC_040048.1	61765294	62181197	+	--	XP_015714004.1 PREDICTED: receptor-type tyrosine-protein phosphatase kappa isoform X10 [Coturnix japonica]	-	-	-	-	-	-	-
TCONS_00004316	--	TCONS_00019502	GPR63	0.968004	7.99e-05	NC_040046.1	170713394	170728522	+	NC_040048.1	76745934	76760996	+	--	XP_005021425.1 PREDICTED: probable G-protein coupled receptor 63 [Anas platyrhynchos]	-	-	-	-	GO:0043234//protein complex;GO:0016020//membrane;GO:0031224//intrinsic component of membrane;GO:0032991//macromolecular complex;GO:0044425//membrane part	-	GO:0044763//single-organism cellular process;GO:0051716//cellular response to stimulus;GO:0009987//cellular process;GO:0007165//signal transduction;GO:0050896//response to stimulus;GO:0050789//regulation of biological process;GO:0065007//biological regulation;GO:0023052//signaling;GO:0007154//cell communication;GO:0007166//cell surface receptor signaling pathway;GO:0044700//single organism signal…
TCONS_00041892	--	TCONS_00019502	GPR63	0.959123	0.000165562	NC_040054.1	10486383	10510102	+	NC_040048.1	76745934	76760996	+	--	XP_005021425.1 PREDICTED: probable G-protein coupled receptor 63 [Anas platyrhynchos]	-	-	-	-	GO:0043234//protein complex;GO:0016020//membrane;GO:0031224//intrinsic component of membrane;GO:0032991//macromolecular complex;GO:0044425//membrane part	-	GO:0044763//single-organism cellular process;GO:0051716//cellular response to stimulus;GO:0009987//cellular process;GO:0007165//signal transduction;GO:0050896//response to stimulus;GO:0050789//regulation of biological process;GO:0065007//biological regulation;GO:0023052//signaling;GO:0007154//cell communication;GO:0007166//cell surface receptor signaling pathway;GO:0044700//single organism signal…
XR_002401731.2	--	TCONS_00019502	GPR63	0.995384	2.45e-07	NC_040053.1	35192537	35197417	+	NC_040048.1	76745934	76760996	+	--	XP_005021425.1 PREDICTED: probable G-protein coupled receptor 63 [Anas platyrhynchos]	-	-	-	-	GO:0043234//protein complex;GO:0016020//membrane;GO:0031224//intrinsic component of membrane;GO:0032991//macromolecular complex;GO:0044425//membrane part	-	GO:0044763//single-organism cellular process;GO:0051716//cellular response to stimulus;GO:0009987//cellular process;GO:0007165//signal transduction;GO:0050896//response to stimulus;GO:0050789//regulation of biological process;GO:0065007//biological regulation;GO:0023052//signaling;GO:0007154//cell communication;GO:0007166//cell surface receptor signaling pathway;GO:0044700//single organism signal…
XR_003497753.1	--	TCONS_00019502	GPR63	0.967163	8.64e-05	NC_040050.1	5582146	5595688	-	NC_040048.1	76745934	76760996	+	--	XP_005021425.1 PREDICTED: probable G-protein coupled receptor 63 [Anas platyrhynchos]	-	-	-	-	GO:0043234//protein complex;GO:0016020//membrane;GO:0031224//intrinsic component of membrane;GO:0032991//macromolecular complex;GO:0044425//membrane part	-	GO:0044763//single-organism cellular process;GO:0051716//cellular response to stimulus;GO:0009987//cellular process;GO:0007165//signal transduction;GO:0050896//response to stimulus;GO:0050789//regulation of biological process;GO:0065007//biological regulation;GO:0023052//signaling;GO:0007154//cell communication;GO:0007166//cell surface receptor signaling pathway;GO:0044700//single organism signal…
XR_003497934.1	--	TCONS_00019502	GPR63	0.966244	9.37e-05	NC_040051.1	26348029	26575846	+	NC_040048.1	76745934	76760996	+	--	XP_005021425.1 PREDICTED: probable G-protein coupled receptor 63 [Anas platyrhynchos]	-	-	-	-	GO:0043234//protein complex;GO:0016020//membrane;GO:0031224//intrinsic component of membrane;GO:0032991//macromolecular complex;GO:0044425//membrane part	-	GO:0044763//single-organism cellular process;GO:0051716//cellular response to stimulus;GO:0009987//cellular process;GO:0007165//signal transduction;GO:0050896//response to stimulus;GO:0050789//regulation of biological process;GO:0065007//biological regulation;GO:0023052//signaling;GO:0007154//cell communication;GO:0007166//cell surface receptor signaling pathway;GO:0044700//single organism signal…
XR_003500725.1	--	TCONS_00019502	GPR63	0.962969	0.000123451	NC_040060.1	14389696	14468946	-	NC_040048.1	76745934	76760996	+	--	XP_005021425.1 PREDICTED: probable G-protein coupled receptor 63 [Anas platyrhynchos]	-	-	-	-	GO:0043234//protein complex;GO:0016020//membrane;GO:0031224//intrinsic component of membrane;GO:0032991//macromolecular complex;GO:0044425//membrane part	-	GO:0044763//single-organism cellular process;GO:0051716//cellular response to stimulus;GO:0009987//cellular process;GO:0007165//signal transduction;GO:0050896//response to stimulus;GO:0050789//regulation of biological process;GO:0065007//biological regulation;GO:0023052//signaling;GO:0007154//cell communication;GO:0007166//cell surface receptor signaling pathway;GO:0044700//single organism signal…
XR_003501057.1	--	TCONS_00019502	GPR63	0.963546	0.00011782	NC_040063.1	8275910	8287160	-	NC_040048.1	76745934	76760996	+	--	XP_005021425.1 PREDICTED: probable G-protein coupled receptor 63 [Anas platyrhynchos]	-	-	-	-	GO:0043234//protein complex;GO:0016020//membrane;GO:0031224//intrinsic component of membrane;GO:0032991//macromolecular complex;GO:0044425//membrane part	-	GO:0044763//single-organism cellular process;GO:0051716//cellular response to stimulus;GO:0009987//cellular process;GO:0007165//signal transduction;GO:0050896//response to stimulus;GO:0050789//regulation of biological process;GO:0065007//biological regulation;GO:0023052//signaling;GO:0007154//cell communication;GO:0007166//cell surface receptor signaling pathway;GO:0044700//single organism signal…
TCONS_00024716	--	TCONS_00020997	Ttbk1	0.950778	0.000287249	NC_040049.1	42469061	42482288	+	NC_040048.1	16584791	16688361	-	--	EOB03089.1 Tau-tubulin kinase 1, partial [Anas platyrhynchos]	-	-	-	-	-	GO:0097159//organic cyclic compound binding;GO:0016301//kinase activity;GO:0016772//transferase activity, transferring phosphorus-containing groups;GO:0001883//purine nucleoside binding;GO:0032550//purine ribonucleoside binding;GO:1901363//heterocyclic compound binding;GO:0005488//binding;GO:0016740//transferase activity;GO:0036094//small molecule binding;GO:0097367//carbohydrate derivative bindi…	GO:0019538//protein metabolic process;GO:0036211//protein modification process;GO:0043170//macromolecule metabolic process;GO:0048856//anatomical structure development;GO:0043412//macromolecule modification;GO:0009987//cellular process;GO:0008152//metabolic process;GO:0044260//cellular macromolecule metabolic process;GO:0044238//primary metabolic process;GO:0071704//organic substance metabolic pr…
TCONS_00044239	--	TCONS_00020997	Ttbk1	0.970785	6.1e-05	NC_040055.1	14408228	14499956	+	NC_040048.1	16584791	16688361	-	--	EOB03089.1 Tau-tubulin kinase 1, partial [Anas platyrhynchos]	-	-	-	-	-	GO:0097159//organic cyclic compound binding;GO:0016301//kinase activity;GO:0016772//transferase activity, transferring phosphorus-containing groups;GO:0001883//purine nucleoside binding;GO:0032550//purine ribonucleoside binding;GO:1901363//heterocyclic compound binding;GO:0005488//binding;GO:0016740//transferase activity;GO:0036094//small molecule binding;GO:0097367//carbohydrate derivative bindi…	GO:0019538//protein metabolic process;GO:0036211//protein modification process;GO:0043170//macromolecule metabolic process;GO:0048856//anatomical structure development;GO:0043412//macromolecule modification;GO:0009987//cellular process;GO:0008152//metabolic process;GO:0044260//cellular macromolecule metabolic process;GO:0044238//primary metabolic process;GO:0071704//organic substance metabolic pr…
XR_003501403.1	--	TCONS_00021760	fam89a	0.950154	0.00029817	NC_040065.1	998135	1019116	-	NC_040048.1	42558072	42560663	-	--	XP_010208400.1 PREDICTED: LOW QUALITY PROTEIN: protein FAM89A-like, partial [Colius striatus]	-	-	-	-	-	-	-
TCONS_00041892	--	TCONS_00021817	MLLT4	0.979191	2.22e-05	NC_040054.1	10486383	10510102	+	NC_040048.1	44157141	44285630	-	--	XP_010705358.1 PREDICTED: afadin isoform X8 [Meleagris gallopavo]	Cellular Processes;Environmental Information Processing;Organismal Systems	Immune system;Signal transduction;Cellular community - eukaryotes	ko04024//cAMP signaling pathway;ko04014//Ras signaling pathway;ko04015//Rap1 signaling pathway;ko04530//Tight junction;ko04520//Adherens junction;ko04670//Leukocyte transendothelial migration	K05702	GO:0005622//intracellular;GO:0070161//anchoring junction;GO:0005623//cell;GO:0016020//membrane;GO:0030054//cell junction;GO:0005911//cell-cell junction;GO:0044464//cell part;GO:0044424//intracellular part	GO:0005488//binding;GO:0005515//protein binding	GO:0050794//regulation of cellular process;GO:0065007//biological regulation;GO:0050789//regulation of biological process
XR_002401731.2	--	TCONS_00021817	MLLT4	0.96902	7.26e-05	NC_040053.1	35192537	35197417	+	NC_040048.1	44157141	44285630	-	--	XP_010705358.1 PREDICTED: afadin isoform X8 [Meleagris gallopavo]	Cellular Processes;Environmental Information Processing;Organismal Systems	Immune system;Signal transduction;Cellular community - eukaryotes	ko04024//cAMP signaling pathway;ko04014//Ras signaling pathway;ko04015//Rap1 signaling pathway;ko04530//Tight junction;ko04520//Adherens junction;ko04670//Leukocyte transendothelial migration	K05702	GO:0005622//intracellular;GO:0070161//anchoring junction;GO:0005623//cell;GO:0016020//membrane;GO:0030054//cell junction;GO:0005911//cell-cell junction;GO:0044464//cell part;GO:0044424//intracellular part	GO:0005488//binding;GO:0005515//protein binding	GO:0050794//regulation of cellular process;GO:0065007//biological regulation;GO:0050789//regulation of biological process
XR_003497753.1	--	TCONS_00021817	MLLT4	0.986515	6.07e-06	NC_040050.1	5582146	5595688	-	NC_040048.1	44157141	44285630	-	--	XP_010705358.1 PREDICTED: afadin isoform X8 [Meleagris gallopavo]	Cellular Processes;Environmental Information Processing;Organismal Systems	Immune system;Signal transduction;Cellular community - eukaryotes	ko04024//cAMP signaling pathway;ko04014//Ras signaling pathway;ko04015//Rap1 signaling pathway;ko04530//Tight junction;ko04520//Adherens junction;ko04670//Leukocyte transendothelial migration	K05702	GO:0005622//intracellular;GO:0070161//anchoring junction;GO:0005623//cell;GO:0016020//membrane;GO:0030054//cell junction;GO:0005911//cell-cell junction;GO:0044464//cell part;GO:0044424//intracellular part	GO:0005488//binding;GO:0005515//protein binding	GO:0050794//regulation of cellular process;GO:0065007//biological regulation;GO:0050789//regulation of biological process
XR_003497934.1	--	TCONS_00021817	MLLT4	0.998116	1.67e-08	NC_040051.1	26348029	26575846	+	NC_040048.1	44157141	44285630	-	--	XP_010705358.1 PREDICTED: afadin isoform X8 [Meleagris gallopavo]	Cellular Processes;Environmental Information Processing;Organismal Systems	Immune system;Signal transduction;Cellular community - eukaryotes	ko04024//cAMP signaling pathway;ko04014//Ras signaling pathway;ko04015//Rap1 signaling pathway;ko04530//Tight junction;ko04520//Adherens junction;ko04670//Leukocyte transendothelial migration	K05702	GO:0005622//intracellular;GO:0070161//anchoring junction;GO:0005623//cell;GO:0016020//membrane;GO:0030054//cell junction;GO:0005911//cell-cell junction;GO:0044464//cell part;GO:0044424//intracellular part	GO:0005488//binding;GO:0005515//protein binding	GO:0050794//regulation of cellular process;GO:0065007//biological regulation;GO:0050789//regulation of biological process
XR_003493925.1	--	TCONS_00022293	DSE	0.981045	1.68e-05	NW_020865859.1	109561	113812	+	NC_040048.1	67349748	67386116	-	--	XP_012960237.1 PREDICTED: dermatan-sulfate epimerase isoform X2 [Anas platyrhynchos]	Metabolism	Glycan biosynthesis and metabolism;Global and overview maps	ko01100//Metabolic pathways;ko00532//Glycosaminoglycan biosynthesis - chondroitin sulfate / dermatan sulfate	K01794	GO:0005623//cell;GO:0005622//intracellular;GO:0043229//intracellular organelle;GO:0043226//organelle;GO:0044464//cell part;GO:0043231//intracellular membrane-bounded organelle;GO:0043227//membrane-bounded organelle;GO:0044424//intracellular part	GO:0016854//racemase and epimerase activity;GO:0016857//racemase and epimerase activity, acting on carbohydrates and derivatives;GO:0003824//catalytic activity;GO:0016853//isomerase activity	GO:0006022//aminoglycan metabolic process;GO:1901576//organic substance biosynthetic process;GO:0030203//glycosaminoglycan metabolic process;GO:1901135//carbohydrate derivative metabolic process;GO:0044711//single-organism biosynthetic process;GO:0009058//biosynthetic process;GO:0009059//macromolecule biosynthetic process;GO:0071704//organic substance metabolic process;GO:1901564//organonitrogen …
XR_003496067.1	--	TCONS_00022295	DSE	0.971344	5.76e-05	NC_040048.1	13592638	13656212	-	NC_040048.1	67349748	67386580	-	--	XP_012960237.1 PREDICTED: dermatan-sulfate epimerase isoform X2 [Anas platyrhynchos]	Metabolism	Glycan biosynthesis and metabolism;Global and overview maps	ko01100//Metabolic pathways;ko00532//Glycosaminoglycan biosynthesis - chondroitin sulfate / dermatan sulfate	K01794	GO:0043226//organelle;GO:0043229//intracellular organelle;GO:0005623//cell;GO:0005622//intracellular;GO:0043227//membrane-bounded organelle;GO:0044464//cell part;GO:0043231//intracellular membrane-bounded organelle;GO:0044424//intracellular part	GO:0016857//racemase and epimerase activity, acting on carbohydrates and derivatives;GO:0016853//isomerase activity;GO:0003824//catalytic activity;GO:0016854//racemase and epimerase activity	GO:0006022//aminoglycan metabolic process;GO:0009059//macromolecule biosynthetic process;GO:0043170//macromolecule metabolic process;GO:0030203//glycosaminoglycan metabolic process;GO:0006807//nitrogen compound metabolic process;GO:0044710//single-organism metabolic process;GO:1901566//organonitrogen compound biosynthetic process;GO:0008152//metabolic process;GO:1901576//organic substance biosynt…
XR_003497027.1	--	TCONS_00022295	DSE	0.971059	5.93e-05	NC_040046.1	170286141	170324380	-	NC_040048.1	67349748	67386580	-	--	XP_012960237.1 PREDICTED: dermatan-sulfate epimerase isoform X2 [Anas platyrhynchos]	Metabolism	Glycan biosynthesis and metabolism;Global and overview maps	ko01100//Metabolic pathways;ko00532//Glycosaminoglycan biosynthesis - chondroitin sulfate / dermatan sulfate	K01794	GO:0043226//organelle;GO:0043229//intracellular organelle;GO:0005623//cell;GO:0005622//intracellular;GO:0043227//membrane-bounded organelle;GO:0044464//cell part;GO:0043231//intracellular membrane-bounded organelle;GO:0044424//intracellular part	GO:0016857//racemase and epimerase activity, acting on carbohydrates and derivatives;GO:0016853//isomerase activity;GO:0003824//catalytic activity;GO:0016854//racemase and epimerase activity	GO:0006022//aminoglycan metabolic process;GO:0009059//macromolecule biosynthetic process;GO:0043170//macromolecule metabolic process;GO:0030203//glycosaminoglycan metabolic process;GO:0006807//nitrogen compound metabolic process;GO:0044710//single-organism metabolic process;GO:1901566//organonitrogen compound biosynthetic process;GO:0008152//metabolic process;GO:1901576//organic substance biosynt…
TCONS_00012101	--	TCONS_00023094	-	0.991057	1.78e-06	NC_040047.1	68277002	68338068	+	NC_040048.1	107894338	107923808	-	--	XP_012950797.1 PREDICTED: protein LYRIC-like [Anas platyrhynchos]	-	-	-	-	-	-	-
XR_001187502.2	--	TCONS_00023642	MANBA	0.962622	0.000126922	NC_040048.1	21360533	21374573	-	NC_040049.1	6353302	6391731	+	--	XP_012953147.1 PREDICTED: beta-mannosidase [Anas platyrhynchos]	Metabolism;Cellular Processes	Glycan biosynthesis and metabolism;Transport and catabolism	ko04142//Lysosome;ko00511//Other glycan degradation	K01192	-	-	-
XR_002399604.2	--	TCONS_00023642	MANBA	0.98474	8.78e-06	NC_040048.1	68697812	68710496	+	NC_040049.1	6353302	6391731	+	--	XP_012953147.1 PREDICTED: beta-mannosidase [Anas platyrhynchos]	Metabolism;Cellular Processes	Glycan biosynthesis and metabolism;Transport and catabolism	ko04142//Lysosome;ko00511//Other glycan degradation	K01192	-	-	-
XR_003493626.1	--	TCONS_00023642	MANBA	0.952982	0.000250775	NW_020865513.1	99511	127117	-	NC_040049.1	6353302	6391731	+	--	XP_012953147.1 PREDICTED: beta-mannosidase [Anas platyrhynchos]	Metabolism;Cellular Processes	Glycan biosynthesis and metabolism;Transport and catabolism	ko04142//Lysosome;ko00511//Other glycan degradation	K01192	-	-	-
XR_003495473.1	--	TCONS_00023642	MANBA	0.959674	0.00015903	NC_040047.1	79731195	79822949	-	NC_040049.1	6353302	6391731	+	--	XP_012953147.1 PREDICTED: beta-mannosidase [Anas platyrhynchos]	Metabolism;Cellular Processes	Glycan biosynthesis and metabolism;Transport and catabolism	ko04142//Lysosome;ko00511//Other glycan degradation	K01192	-	-	-
TCONS_00038080	--	TCONS_00025520	-	0.977626	2.75e-05	NC_040052.1	28830732	28842721	-	NC_040049.1	68872834	68930830	+	--	EOB03809.1 hypothetical protein Anapl_00044 [Anas platyrhynchos]	-	-	-	-	-	-	-
XR_001190174.3	--	TCONS_00025520	-	0.971195	5.85e-05	NC_040050.1	57161753	57238119	-	NC_040049.1	68872834	68930830	+	--	EOB03809.1 hypothetical protein Anapl_00044 [Anas platyrhynchos]	-	-	-	-	-	-	-
TCONS_00069861	--	TCONS_00026058	CETN1	0.96009	0.000154208	NW_020865203.1	14680	20907	-	NC_040049.1	10056175	10060861	-	--	EOB06902.1 Centrin-1, partial [Anas platyrhynchos]	Genetic Information Processing	Replication and repair	ko03420//Nucleotide excision repair	K10840	GO:0043228//non-membrane-bounded organelle;GO:0044430//cytoskeletal part;GO:0043226//organelle;GO:0044446//intracellular organelle part;GO:0005815//microtubule organizing center;GO:0005856//cytoskeleton;GO:0044424//intracellular part;GO:0031513//nonmotile primary cilium;GO:0043229//intracellular organelle;GO:0044464//cell part;GO:0044422//organelle part;GO:0072372//primary cilium;GO:0005929//cili…	GO:0032403//protein complex binding;GO:0044877//macromolecular complex binding;GO:0005515//protein binding;GO:0008092//cytoskeletal protein binding;GO:0043169//cation binding;GO:0005488//binding;GO:0015631//tubulin binding;GO:0046872//metal ion binding;GO:0043167//ion binding	GO:0050896//response to stimulus;GO:0009266//response to temperature stimulus;GO:0009628//response to abiotic stimulus;GO:0009408//response to heat;GO:0006950//response to stress
XR_002398923.2	--	TCONS_00026058	CETN1	0.987972	4.31e-06	NC_040064.1	849539	901316	-	NC_040049.1	10056175	10060861	-	--	EOB06902.1 Centrin-1, partial [Anas platyrhynchos]	Genetic Information Processing	Replication and repair	ko03420//Nucleotide excision repair	K10840	GO:0043228//non-membrane-bounded organelle;GO:0044430//cytoskeletal part;GO:0043226//organelle;GO:0044446//intracellular organelle part;GO:0005815//microtubule organizing center;GO:0005856//cytoskeleton;GO:0044424//intracellular part;GO:0031513//nonmotile primary cilium;GO:0043229//intracellular organelle;GO:0044464//cell part;GO:0044422//organelle part;GO:0072372//primary cilium;GO:0005929//cili…	GO:0032403//protein complex binding;GO:0044877//macromolecular complex binding;GO:0005515//protein binding;GO:0008092//cytoskeletal protein binding;GO:0043169//cation binding;GO:0005488//binding;GO:0015631//tubulin binding;GO:0046872//metal ion binding;GO:0043167//ion binding	GO:0050896//response to stimulus;GO:0009266//response to temperature stimulus;GO:0009628//response to abiotic stimulus;GO:0009408//response to heat;GO:0006950//response to stress
XR_003496728.1	--	TCONS_00026058	CETN1	0.952251	0.000262505	NC_040049.1	70548457	70550082	-	NC_040049.1	10056175	10060861	-	--	EOB06902.1 Centrin-1, partial [Anas platyrhynchos]	Genetic Information Processing	Replication and repair	ko03420//Nucleotide excision repair	K10840	GO:0043228//non-membrane-bounded organelle;GO:0044430//cytoskeletal part;GO:0043226//organelle;GO:0044446//intracellular organelle part;GO:0005815//microtubule organizing center;GO:0005856//cytoskeleton;GO:0044424//intracellular part;GO:0031513//nonmotile primary cilium;GO:0043229//intracellular organelle;GO:0044464//cell part;GO:0044422//organelle part;GO:0072372//primary cilium;GO:0005929//cili…	GO:0032403//protein complex binding;GO:0044877//macromolecular complex binding;GO:0005515//protein binding;GO:0008092//cytoskeletal protein binding;GO:0043169//cation binding;GO:0005488//binding;GO:0015631//tubulin binding;GO:0046872//metal ion binding;GO:0043167//ion binding	GO:0050896//response to stimulus;GO:0009266//response to temperature stimulus;GO:0009628//response to abiotic stimulus;GO:0009408//response to heat;GO:0006950//response to stress
TCONS_00069861	--	TCONS_00026952	FGF2	0.955419	0.000214171	NW_020865203.1	14680	20907	-	NC_040049.1	42958707	42991361	-	--	NP_990764.1 fibroblast growth factor 2 precursor [Gallus gallus]	Environmental Information Processing;Cellular Processes;Human Diseases	Cellular community - eukaryotes;Signal transduction;Infectious diseases;Drug resistance;Cancers;Cell motility	ko05200//Pathways in cancer;ko04010//MAPK signaling pathway;ko04151//PI3K-Akt signaling pathway;ko05205//Proteoglycans in cancer;ko04810//Regulation of actin cytoskeleton;ko04014//Ras signaling pathway;ko04015//Rap1 signaling pathway;ko05167//Kaposi sarcoma-associated herpesvirus infection;ko05226//Gastric cancer;ko04550//Signaling pathways regulating pluripotency of stem cells;ko05224//Breast ca…	K18497	GO:0043229//intracellular organelle;GO:0044464//cell part;GO:0005737//cytoplasm;GO:0005576//extracellular region;GO:0044421//extracellular region part;GO:0044424//intracellular part;GO:0043231//intracellular membrane-bounded organelle;GO:0043226//organelle;GO:0043227//membrane-bounded organelle;GO:0005622//intracellular;GO:0005623//cell;GO:0044444//cytoplasmic part	GO:0097367//carbohydrate derivative binding;GO:1901363//heterocyclic compound binding;GO:0005102//receptor binding;GO:0070851//growth factor receptor binding;GO:0001883//purine nucleoside binding;GO:0005488//binding;GO:0005515//protein binding;GO:0097159//organic cyclic compound binding;GO:0032549//ribonucleoside binding;GO:0032550//purine ribonucleoside binding;GO:0005539//glycosaminoglycan bind…	GO:0002065//columnar/cuboidal epithelial cell differentiation;GO:0002067//glandular epithelial cell differentiation;GO:0001934//positive regulation of protein phosphorylation;GO:0048513//animal organ development;GO:0080090//regulation of primary metabolic process;GO:0045765//regulation of angiogenesis;GO:0045595//regulation of cell differentiation;GO:0061138//morphogenesis of a branching epitheli…
XR_003493494.1	--	TCONS_00026952	FGF2	0.966293	9.33e-05	NW_020865354.1	139234	142453	+	NC_040049.1	42958707	42991361	-	--	NP_990764.1 fibroblast growth factor 2 precursor [Gallus gallus]	Environmental Information Processing;Cellular Processes;Human Diseases	Cellular community - eukaryotes;Signal transduction;Infectious diseases;Drug resistance;Cancers;Cell motility	ko05200//Pathways in cancer;ko04010//MAPK signaling pathway;ko04151//PI3K-Akt signaling pathway;ko05205//Proteoglycans in cancer;ko04810//Regulation of actin cytoskeleton;ko04014//Ras signaling pathway;ko04015//Rap1 signaling pathway;ko05167//Kaposi sarcoma-associated herpesvirus infection;ko05226//Gastric cancer;ko04550//Signaling pathways regulating pluripotency of stem cells;ko05224//Breast ca…	K18497	GO:0043229//intracellular organelle;GO:0044464//cell part;GO:0005737//cytoplasm;GO:0005576//extracellular region;GO:0044421//extracellular region part;GO:0044424//intracellular part;GO:0043231//intracellular membrane-bounded organelle;GO:0043226//organelle;GO:0043227//membrane-bounded organelle;GO:0005622//intracellular;GO:0005623//cell;GO:0044444//cytoplasmic part	GO:0097367//carbohydrate derivative binding;GO:1901363//heterocyclic compound binding;GO:0005102//receptor binding;GO:0070851//growth factor receptor binding;GO:0001883//purine nucleoside binding;GO:0005488//binding;GO:0005515//protein binding;GO:0097159//organic cyclic compound binding;GO:0032549//ribonucleoside binding;GO:0032550//purine ribonucleoside binding;GO:0005539//glycosaminoglycan bind…	GO:0002065//columnar/cuboidal epithelial cell differentiation;GO:0002067//glandular epithelial cell differentiation;GO:0001934//positive regulation of protein phosphorylation;GO:0048513//animal organ development;GO:0080090//regulation of primary metabolic process;GO:0045765//regulation of angiogenesis;GO:0045595//regulation of cell differentiation;GO:0061138//morphogenesis of a branching epitheli…
XR_003495360.1	--	TCONS_00026952	FGF2	0.95552	0.000212725	NC_040047.1	53835850	53855013	-	NC_040049.1	42958707	42991361	-	--	NP_990764.1 fibroblast growth factor 2 precursor [Gallus gallus]	Environmental Information Processing;Cellular Processes;Human Diseases	Cellular community - eukaryotes;Signal transduction;Infectious diseases;Drug resistance;Cancers;Cell motility	ko05200//Pathways in cancer;ko04010//MAPK signaling pathway;ko04151//PI3K-Akt signaling pathway;ko05205//Proteoglycans in cancer;ko04810//Regulation of actin cytoskeleton;ko04014//Ras signaling pathway;ko04015//Rap1 signaling pathway;ko05167//Kaposi sarcoma-associated herpesvirus infection;ko05226//Gastric cancer;ko04550//Signaling pathways regulating pluripotency of stem cells;ko05224//Breast ca…	K18497	GO:0043229//intracellular organelle;GO:0044464//cell part;GO:0005737//cytoplasm;GO:0005576//extracellular region;GO:0044421//extracellular region part;GO:0044424//intracellular part;GO:0043231//intracellular membrane-bounded organelle;GO:0043226//organelle;GO:0043227//membrane-bounded organelle;GO:0005622//intracellular;GO:0005623//cell;GO:0044444//cytoplasmic part	GO:0097367//carbohydrate derivative binding;GO:1901363//heterocyclic compound binding;GO:0005102//receptor binding;GO:0070851//growth factor receptor binding;GO:0001883//purine nucleoside binding;GO:0005488//binding;GO:0005515//protein binding;GO:0097159//organic cyclic compound binding;GO:0032549//ribonucleoside binding;GO:0032550//purine ribonucleoside binding;GO:0005539//glycosaminoglycan bind…	GO:0002065//columnar/cuboidal epithelial cell differentiation;GO:0002067//glandular epithelial cell differentiation;GO:0001934//positive regulation of protein phosphorylation;GO:0048513//animal organ development;GO:0080090//regulation of primary metabolic process;GO:0045765//regulation of angiogenesis;GO:0045595//regulation of cell differentiation;GO:0061138//morphogenesis of a branching epitheli…
XR_003497816.1	--	TCONS_00026952	FGF2	0.957518	0.000185615	NC_040050.1	30895238	30900671	-	NC_040049.1	42958707	42991361	-	--	NP_990764.1 fibroblast growth factor 2 precursor [Gallus gallus]	Environmental Information Processing;Cellular Processes;Human Diseases	Cellular community - eukaryotes;Signal transduction;Infectious diseases;Drug resistance;Cancers;Cell motility	ko05200//Pathways in cancer;ko04010//MAPK signaling pathway;ko04151//PI3K-Akt signaling pathway;ko05205//Proteoglycans in cancer;ko04810//Regulation of actin cytoskeleton;ko04014//Ras signaling pathway;ko04015//Rap1 signaling pathway;ko05167//Kaposi sarcoma-associated herpesvirus infection;ko05226//Gastric cancer;ko04550//Signaling pathways regulating pluripotency of stem cells;ko05224//Breast ca…	K18497	GO:0043229//intracellular organelle;GO:0044464//cell part;GO:0005737//cytoplasm;GO:0005576//extracellular region;GO:0044421//extracellular region part;GO:0044424//intracellular part;GO:0043231//intracellular membrane-bounded organelle;GO:0043226//organelle;GO:0043227//membrane-bounded organelle;GO:0005622//intracellular;GO:0005623//cell;GO:0044444//cytoplasmic part	GO:0097367//carbohydrate derivative binding;GO:1901363//heterocyclic compound binding;GO:0005102//receptor binding;GO:0070851//growth factor receptor binding;GO:0001883//purine nucleoside binding;GO:0005488//binding;GO:0005515//protein binding;GO:0097159//organic cyclic compound binding;GO:0032549//ribonucleoside binding;GO:0032550//purine ribonucleoside binding;GO:0005539//glycosaminoglycan bind…	GO:0002065//columnar/cuboidal epithelial cell differentiation;GO:0002067//glandular epithelial cell differentiation;GO:0001934//positive regulation of protein phosphorylation;GO:0048513//animal organ development;GO:0080090//regulation of primary metabolic process;GO:0045765//regulation of angiogenesis;GO:0045595//regulation of cell differentiation;GO:0061138//morphogenesis of a branching epitheli…
XR_003500093.1	--	TCONS_00026952	FGF2	-0.958242	0.000176383	NC_040057.1	12378042	12386253	-	NC_040049.1	42958707	42991361	-	--	NP_990764.1 fibroblast growth factor 2 precursor [Gallus gallus]	Environmental Information Processing;Cellular Processes;Human Diseases	Cellular community - eukaryotes;Signal transduction;Infectious diseases;Drug resistance;Cancers;Cell motility	ko05200//Pathways in cancer;ko04010//MAPK signaling pathway;ko04151//PI3K-Akt signaling pathway;ko05205//Proteoglycans in cancer;ko04810//Regulation of actin cytoskeleton;ko04014//Ras signaling pathway;ko04015//Rap1 signaling pathway;ko05167//Kaposi sarcoma-associated herpesvirus infection;ko05226//Gastric cancer;ko04550//Signaling pathways regulating pluripotency of stem cells;ko05224//Breast ca…	K18497	GO:0043229//intracellular organelle;GO:0044464//cell part;GO:0005737//cytoplasm;GO:0005576//extracellular region;GO:0044421//extracellular region part;GO:0044424//intracellular part;GO:0043231//intracellular membrane-bounded organelle;GO:0043226//organelle;GO:0043227//membrane-bounded organelle;GO:0005622//intracellular;GO:0005623//cell;GO:0044444//cytoplasmic part	GO:0097367//carbohydrate derivative binding;GO:1901363//heterocyclic compound binding;GO:0005102//receptor binding;GO:0070851//growth factor receptor binding;GO:0001883//purine nucleoside binding;GO:0005488//binding;GO:0005515//protein binding;GO:0097159//organic cyclic compound binding;GO:0032549//ribonucleoside binding;GO:0032550//purine ribonucleoside binding;GO:0005539//glycosaminoglycan bind…	GO:0002065//columnar/cuboidal epithelial cell differentiation;GO:0002067//glandular epithelial cell differentiation;GO:0001934//positive regulation of protein phosphorylation;GO:0048513//animal organ development;GO:0080090//regulation of primary metabolic process;GO:0045765//regulation of angiogenesis;GO:0045595//regulation of cell differentiation;GO:0061138//morphogenesis of a branching epitheli…
TCONS_00008389	--	TCONS_00027957	DDRGK1	0.963521	0.000118066	NC_040046.1	129859216	129875551	-	NC_040049.1	73647701	73658059	-	--	EOB08214.1 Uncharacterized protein C20orf116, partial [Anas platyrhynchos]	-	-	-	-	-	-	-
TCONS_00011835	--	TCONS_00027957	DDRGK1	0.968321	7.76e-05	NC_040047.1	57408380	57409820	+	NC_040049.1	73647701	73658059	-	--	EOB08214.1 Uncharacterized protein C20orf116, partial [Anas platyrhynchos]	-	-	-	-	-	-	-
TCONS_00023690	--	TCONS_00027957	DDRGK1	0.973406	4.61e-05	NC_040049.1	7077553	7084395	+	NC_040049.1	73647701	73658059	-	--	EOB08214.1 Uncharacterized protein C20orf116, partial [Anas platyrhynchos]	-	-	-	-	-	-	-
TCONS_00023693	--	TCONS_00027957	DDRGK1	0.958665	0.000171129	NC_040049.1	7085229	7088193	+	NC_040049.1	73647701	73658059	-	--	EOB08214.1 Uncharacterized protein C20orf116, partial [Anas platyrhynchos]	-	-	-	-	-	-	-
TCONS_00061153	--	TCONS_00027957	DDRGK1	0.958565	0.000172359	NC_040067.1	4282222	4303667	+	NC_040049.1	73647701	73658059	-	--	EOB08214.1 Uncharacterized protein C20orf116, partial [Anas platyrhynchos]	-	-	-	-	-	-	-
XR_001191758.3	--	TCONS_00027957	DDRGK1	0.964476	0.000109111	NC_040050.1	41581064	41582802	+	NC_040049.1	73647701	73658059	-	--	EOB08214.1 Uncharacterized protein C20orf116, partial [Anas platyrhynchos]	-	-	-	-	-	-	-
XR_002404149.2	--	TCONS_00027957	DDRGK1	0.981572	1.54e-05	NC_040049.1	75102297	75111170	+	NC_040049.1	73647701	73658059	-	--	EOB08214.1 Uncharacterized protein C20orf116, partial [Anas platyrhynchos]	-	-	-	-	-	-	-
XR_002404603.2	--	TCONS_00027957	DDRGK1	0.977725	2.72e-05	NW_020865824.1	26310	33485	-	NC_040049.1	73647701	73658059	-	--	EOB08214.1 Uncharacterized protein C20orf116, partial [Anas platyrhynchos]	-	-	-	-	-	-	-
XR_003492494.1	--	TCONS_00027957	DDRGK1	0.96263	0.000126843	NC_040070.1	4732667	4879343	-	NC_040049.1	73647701	73658059	-	--	EOB08214.1 Uncharacterized protein C20orf116, partial [Anas platyrhynchos]	-	-	-	-	-	-	-
XR_003493829.1	--	TCONS_00027957	DDRGK1	0.967286	8.54e-05	NW_020865675.1	36803	38302	+	NC_040049.1	73647701	73658059	-	--	EOB08214.1 Uncharacterized protein C20orf116, partial [Anas platyrhynchos]	-	-	-	-	-	-	-
XR_003494933.1	--	TCONS_00027957	DDRGK1	0.995744	1.92e-07	NC_040046.1	122057549	122059719	+	NC_040049.1	73647701	73658059	-	--	EOB08214.1 Uncharacterized protein C20orf116, partial [Anas platyrhynchos]	-	-	-	-	-	-	-
XR_003496543.1	--	TCONS_00027957	DDRGK1	0.968341	7.75e-05	NC_040048.1	81233801	81241482	+	NC_040049.1	73647701	73658059	-	--	EOB08214.1 Uncharacterized protein C20orf116, partial [Anas platyrhynchos]	-	-	-	-	-	-	-
XR_003497509.1	--	TCONS_00027957	DDRGK1	0.989759	2.66e-06	NC_040050.1	61187374	61379338	-	NC_040049.1	73647701	73658059	-	--	EOB08214.1 Uncharacterized protein C20orf116, partial [Anas platyrhynchos]	-	-	-	-	-	-	-
XR_003497532.1	--	TCONS_00027957	DDRGK1	0.953947	0.000235823	NC_040050.1	27345810	27347757	+	NC_040049.1	73647701	73658059	-	--	EOB08214.1 Uncharacterized protein C20orf116, partial [Anas platyrhynchos]	-	-	-	-	-	-	-
XR_003498740.1	--	TCONS_00027957	DDRGK1	0.964532	0.0001086	NC_040053.1	27267622	27367643	+	NC_040049.1	73647701	73658059	-	--	EOB08214.1 Uncharacterized protein C20orf116, partial [Anas platyrhynchos]	-	-	-	-	-	-	-
XR_003501547.1	--	TCONS_00027957	DDRGK1	0.968604	7.56e-05	NC_040066.1	4470374	4504211	+	NC_040049.1	73647701	73658059	-	--	EOB08214.1 Uncharacterized protein C20orf116, partial [Anas platyrhynchos]	-	-	-	-	-	-	-
TCONS_00008389	--	TCONS_00028018	ZNF638	0.986917	5.54e-06	NC_040046.1	129859216	129875551	-	NC_040049.1	75703280	75748509	-	--	XP_012962986.1 PREDICTED: LOW QUALITY PROTEIN: zinc finger protein 638 [Anas platyrhynchos]	-	-	-	-	-	-	-
XR_002403108.2	--	TCONS_00028018	ZNF638	0.960513	0.000149405	NC_040046.1	131993181	132020617	+	NC_040049.1	75703280	75748509	-	--	XP_012962986.1 PREDICTED: LOW QUALITY PROTEIN: zinc finger protein 638 [Anas platyrhynchos]	-	-	-	-	-	-	-
XR_002404603.2	--	TCONS_00028018	ZNF638	0.959501	0.00016106	NW_020865824.1	26310	33485	-	NC_040049.1	75703280	75748509	-	--	XP_012962986.1 PREDICTED: LOW QUALITY PROTEIN: zinc finger protein 638 [Anas platyrhynchos]	-	-	-	-	-	-	-
XR_003492443.1	--	TCONS_00028018	ZNF638	0.952911	0.000251904	NC_040070.1	2110458	2150180	-	NC_040049.1	75703280	75748509	-	--	XP_012962986.1 PREDICTED: LOW QUALITY PROTEIN: zinc finger protein 638 [Anas platyrhynchos]	-	-	-	-	-	-	-
XR_003492494.1	--	TCONS_00028018	ZNF638	0.988652	3.62e-06	NC_040070.1	4732667	4879343	-	NC_040049.1	75703280	75748509	-	--	XP_012962986.1 PREDICTED: LOW QUALITY PROTEIN: zinc finger protein 638 [Anas platyrhynchos]	-	-	-	-	-	-	-
XR_003493829.1	--	TCONS_00028018	ZNF638	0.955261	0.000216427	NW_020865675.1	36803	38302	+	NC_040049.1	75703280	75748509	-	--	XP_012962986.1 PREDICTED: LOW QUALITY PROTEIN: zinc finger protein 638 [Anas platyrhynchos]	-	-	-	-	-	-	-
XR_003494933.1	--	TCONS_00028018	ZNF638	0.955202	0.000217268	NC_040046.1	122057549	122059719	+	NC_040049.1	75703280	75748509	-	--	XP_012962986.1 PREDICTED: LOW QUALITY PROTEIN: zinc finger protein 638 [Anas platyrhynchos]	-	-	-	-	-	-	-
TCONS_00051033	--	TCONS_00028171	TANC1	0.980208	1.91e-05	NC_040059.1	10124528	10137918	+	NC_040050.1	4142568	4256286	+	--	XP_012962406.1 PREDICTED: protein TANC1 isoform X3 [Anas platyrhynchos]	-	-	-	-	GO:0044464//cell part;GO:0042995//cell projection;GO:0033267//axon part;GO:0005623//cell;GO:0044297//cell body;GO:0043005//neuron projection;GO:0030424//axon;GO:0097458//neuron part;GO:0044463//cell projection part	-	GO:0009416//response to light stimulus;GO:0071840//cellular component organization or biogenesis;GO:0007610//behavior;GO:0009314//response to radiation;GO:0044707//single-multicellular organism process;GO:0016043//cellular component organization;GO:0009628//response to abiotic stimulus;GO:0007632//visual behavior;GO:0044763//single-organism cellular process;GO:0044708//single-organism behavior;GO…
TCONS_00069861	--	TCONS_00028439	ZBTB1	0.985837	7.03e-06	NW_020865203.1	14680	20907	-	NC_040050.1	11833449	11857566	+	--	XP_005022717.1 PREDICTED: zinc finger and BTB domain-containing protein 1 isoform X2 [Anas platyrhynchos]	-	-	-	-	GO:0043233//organelle lumen;GO:0005622//intracellular;GO:0043231//intracellular membrane-bounded organelle;GO:0031981//nuclear lumen;GO:0005654//nucleoplasm;GO:0044428//nuclear part;GO:0044464//cell part;GO:0043229//intracellular organelle;GO:0043227//membrane-bounded organelle;GO:0005634//nucleus;GO:0044451//nucleoplasm part;GO:0043226//organelle;GO:0005623//cell;GO:0044424//intracellular part;G…	GO:0043169//cation binding;GO:0005488//binding;GO:0097159//organic cyclic compound binding;GO:0005515//protein binding;GO:0046983//protein dimerization activity;GO:0043167//ion binding	GO:0090304//nucleic acid metabolic process;GO:0044767//single-organism developmental process;GO:0002250//adaptive immune response;GO:0032774//RNA biosynthetic process;GO:0002460//adaptive immune response based on somatic recombination of immune receptors built from immunoglobulin superfamily domains;GO:0050865//regulation of cell activation;GO:0006139//nucleobase-containing compound metabolic pro…
XR_002398923.2	--	TCONS_00028439	ZBTB1	0.967401	8.45e-05	NC_040064.1	849539	901316	-	NC_040050.1	11833449	11857566	+	--	XP_005022717.1 PREDICTED: zinc finger and BTB domain-containing protein 1 isoform X2 [Anas platyrhynchos]	-	-	-	-	GO:0043233//organelle lumen;GO:0005622//intracellular;GO:0043231//intracellular membrane-bounded organelle;GO:0031981//nuclear lumen;GO:0005654//nucleoplasm;GO:0044428//nuclear part;GO:0044464//cell part;GO:0043229//intracellular organelle;GO:0043227//membrane-bounded organelle;GO:0005634//nucleus;GO:0044451//nucleoplasm part;GO:0043226//organelle;GO:0005623//cell;GO:0044424//intracellular part;G…	GO:0043169//cation binding;GO:0005488//binding;GO:0097159//organic cyclic compound binding;GO:0005515//protein binding;GO:0046983//protein dimerization activity;GO:0043167//ion binding	GO:0090304//nucleic acid metabolic process;GO:0044767//single-organism developmental process;GO:0002250//adaptive immune response;GO:0032774//RNA biosynthetic process;GO:0002460//adaptive immune response based on somatic recombination of immune receptors built from immunoglobulin superfamily domains;GO:0050865//regulation of cell activation;GO:0006139//nucleobase-containing compound metabolic pro…
XR_003493494.1	--	TCONS_00028439	ZBTB1	0.955341	0.000215281	NW_020865354.1	139234	142453	+	NC_040050.1	11833449	11857566	+	--	XP_005022717.1 PREDICTED: zinc finger and BTB domain-containing protein 1 isoform X2 [Anas platyrhynchos]	-	-	-	-	GO:0043233//organelle lumen;GO:0005622//intracellular;GO:0043231//intracellular membrane-bounded organelle;GO:0031981//nuclear lumen;GO:0005654//nucleoplasm;GO:0044428//nuclear part;GO:0044464//cell part;GO:0043229//intracellular organelle;GO:0043227//membrane-bounded organelle;GO:0005634//nucleus;GO:0044451//nucleoplasm part;GO:0043226//organelle;GO:0005623//cell;GO:0044424//intracellular part;G…	GO:0043169//cation binding;GO:0005488//binding;GO:0097159//organic cyclic compound binding;GO:0005515//protein binding;GO:0046983//protein dimerization activity;GO:0043167//ion binding	GO:0090304//nucleic acid metabolic process;GO:0044767//single-organism developmental process;GO:0002250//adaptive immune response;GO:0032774//RNA biosynthetic process;GO:0002460//adaptive immune response based on somatic recombination of immune receptors built from immunoglobulin superfamily domains;GO:0050865//regulation of cell activation;GO:0006139//nucleobase-containing compound metabolic pro…
XR_003495255.1	--	TCONS_00028439	ZBTB1	0.950071	0.000299643	NC_040047.1	33224495	33235560	+	NC_040050.1	11833449	11857566	+	--	XP_005022717.1 PREDICTED: zinc finger and BTB domain-containing protein 1 isoform X2 [Anas platyrhynchos]	-	-	-	-	GO:0043233//organelle lumen;GO:0005622//intracellular;GO:0043231//intracellular membrane-bounded organelle;GO:0031981//nuclear lumen;GO:0005654//nucleoplasm;GO:0044428//nuclear part;GO:0044464//cell part;GO:0043229//intracellular organelle;GO:0043227//membrane-bounded organelle;GO:0005634//nucleus;GO:0044451//nucleoplasm part;GO:0043226//organelle;GO:0005623//cell;GO:0044424//intracellular part;G…	GO:0043169//cation binding;GO:0005488//binding;GO:0097159//organic cyclic compound binding;GO:0005515//protein binding;GO:0046983//protein dimerization activity;GO:0043167//ion binding	GO:0090304//nucleic acid metabolic process;GO:0044767//single-organism developmental process;GO:0002250//adaptive immune response;GO:0032774//RNA biosynthetic process;GO:0002460//adaptive immune response based on somatic recombination of immune receptors built from immunoglobulin superfamily domains;GO:0050865//regulation of cell activation;GO:0006139//nucleobase-containing compound metabolic pro…
XR_003496728.1	--	TCONS_00028439	ZBTB1	0.979305	2.18e-05	NC_040049.1	70548457	70550082	-	NC_040050.1	11833449	11857566	+	--	XP_005022717.1 PREDICTED: zinc finger and BTB domain-containing protein 1 isoform X2 [Anas platyrhynchos]	-	-	-	-	GO:0043233//organelle lumen;GO:0005622//intracellular;GO:0043231//intracellular membrane-bounded organelle;GO:0031981//nuclear lumen;GO:0005654//nucleoplasm;GO:0044428//nuclear part;GO:0044464//cell part;GO:0043229//intracellular organelle;GO:0043227//membrane-bounded organelle;GO:0005634//nucleus;GO:0044451//nucleoplasm part;GO:0043226//organelle;GO:0005623//cell;GO:0044424//intracellular part;G…	GO:0043169//cation binding;GO:0005488//binding;GO:0097159//organic cyclic compound binding;GO:0005515//protein binding;GO:0046983//protein dimerization activity;GO:0043167//ion binding	GO:0090304//nucleic acid metabolic process;GO:0044767//single-organism developmental process;GO:0002250//adaptive immune response;GO:0032774//RNA biosynthetic process;GO:0002460//adaptive immune response based on somatic recombination of immune receptors built from immunoglobulin superfamily domains;GO:0050865//regulation of cell activation;GO:0006139//nucleobase-containing compound metabolic pro…
TCONS_00012101	--	TCONS_00028615	Slc25a29	0.960259	0.00015227	NC_040047.1	68277002	68338068	+	NC_040050.1	16546351	16552062	+	--	EOB00421.1 Mitochondrial carnitine/acylcarnitine carrier protein CACL, partial [Anas platyrhynchos]	Organismal Systems	Environmental adaptation	ko04714//Thermogenesis	K15109	-	-	-
XR_003496563.1	--	TCONS_00028867	TMED8	0.95842	0.000174165	NC_040048.1	84612738	84627643	-	NC_040050.1	27109714	27122394	+	--	EOB05509.1 Protein TMED8, partial [Anas platyrhynchos]	-	-	-	-	-	-	-
TCONS_00004331	--	TCONS_00028882	Zdhhc22	0.963579	0.000117509	NC_040046.1	170855303	170879013	+	NC_040050.1	27250975	27259523	+	--	XP_005013933.1 PREDICTED: palmitoyltransferase ZDHHC22 [Anas platyrhynchos]	-	-	-	-	GO:0005623//cell;GO:0043231//intracellular membrane-bounded organelle;GO:0044425//membrane part;GO:0031224//intrinsic component of membrane;GO:0043229//intracellular organelle;GO:0005622//intracellular;GO:0043226//organelle;GO:0044464//cell part;GO:0044424//intracellular part;GO:0016020//membrane;GO:0043227//membrane-bounded organelle	GO:0016740//transferase activity;GO:0043167//ion binding;GO:0046872//metal ion binding;GO:0016409//palmitoyltransferase activity;GO:0016746//transferase activity, transferring acyl groups;GO:0046914//transition metal ion binding;GO:0043169//cation binding;GO:0003824//catalytic activity;GO:0005488//binding;GO:0016747//transferase activity, transferring acyl groups other than amino-acyl groups	GO:0071704//organic substance metabolic process;GO:0044802//single-organism membrane organization;GO:0042158//lipoprotein biosynthetic process;GO:0008152//metabolic process;GO:0044249//cellular biosynthetic process;GO:0010256//endomembrane system organization;GO:0006497//protein lipidation;GO:0009987//cellular process;GO:0044260//cellular macromolecule metabolic process;GO:0061024//membrane organ…
TCONS_00034887	--	TCONS_00028882	Zdhhc22	0.95145	0.000275775	NC_040051.1	23189695	23192304	-	NC_040050.1	27250975	27259523	+	--	XP_005013933.1 PREDICTED: palmitoyltransferase ZDHHC22 [Anas platyrhynchos]	-	-	-	-	GO:0005623//cell;GO:0043231//intracellular membrane-bounded organelle;GO:0044425//membrane part;GO:0031224//intrinsic component of membrane;GO:0043229//intracellular organelle;GO:0005622//intracellular;GO:0043226//organelle;GO:0044464//cell part;GO:0044424//intracellular part;GO:0016020//membrane;GO:0043227//membrane-bounded organelle	GO:0016740//transferase activity;GO:0043167//ion binding;GO:0046872//metal ion binding;GO:0016409//palmitoyltransferase activity;GO:0016746//transferase activity, transferring acyl groups;GO:0046914//transition metal ion binding;GO:0043169//cation binding;GO:0003824//catalytic activity;GO:0005488//binding;GO:0016747//transferase activity, transferring acyl groups other than amino-acyl groups	GO:0071704//organic substance metabolic process;GO:0044802//single-organism membrane organization;GO:0042158//lipoprotein biosynthetic process;GO:0008152//metabolic process;GO:0044249//cellular biosynthetic process;GO:0010256//endomembrane system organization;GO:0006497//protein lipidation;GO:0009987//cellular process;GO:0044260//cellular macromolecule metabolic process;GO:0061024//membrane organ…
TCONS_00041892	--	TCONS_00029171	PTPN5	0.958358	0.000174929	NC_040054.1	10486383	10510102	+	NC_040050.1	33555266	33687317	+	--	EOA95098.1 Tyrosine-protein phosphatase non-receptor type 5, partial [Anas platyrhynchos]	Environmental Information Processing	Signal transduction	ko04010//MAPK signaling pathway	K18018	-	-	-
TCONS_00045460	--	TCONS_00029171	PTPN5	0.957942	0.000180169	NC_040056.1	4309249	4452911	+	NC_040050.1	33555266	33687317	+	--	EOA95098.1 Tyrosine-protein phosphatase non-receptor type 5, partial [Anas platyrhynchos]	Environmental Information Processing	Signal transduction	ko04010//MAPK signaling pathway	K18018	-	-	-
TCONS_00066773	--	TCONS_00029171	PTPN5	0.959738	0.000158273	NC_040075.1	21782117	21795286	+	NC_040050.1	33555266	33687317	+	--	EOA95098.1 Tyrosine-protein phosphatase non-receptor type 5, partial [Anas platyrhynchos]	Environmental Information Processing	Signal transduction	ko04010//MAPK signaling pathway	K18018	-	-	-
XR_002401731.2	--	TCONS_00029171	PTPN5	0.982705	1.28e-05	NC_040053.1	35192537	35197417	+	NC_040050.1	33555266	33687317	+	--	EOA95098.1 Tyrosine-protein phosphatase non-receptor type 5, partial [Anas platyrhynchos]	Environmental Information Processing	Signal transduction	ko04010//MAPK signaling pathway	K18018	-	-	-
XR_003497753.1	--	TCONS_00029171	PTPN5	0.960337	0.000151391	NC_040050.1	5582146	5595688	-	NC_040050.1	33555266	33687317	+	--	EOA95098.1 Tyrosine-protein phosphatase non-receptor type 5, partial [Anas platyrhynchos]	Environmental Information Processing	Signal transduction	ko04010//MAPK signaling pathway	K18018	-	-	-
XR_003497934.1	--	TCONS_00029171	PTPN5	0.97004	6.57e-05	NC_040051.1	26348029	26575846	+	NC_040050.1	33555266	33687317	+	--	EOA95098.1 Tyrosine-protein phosphatase non-receptor type 5, partial [Anas platyrhynchos]	Environmental Information Processing	Signal transduction	ko04010//MAPK signaling pathway	K18018	-	-	-
XR_003498107.1	--	TCONS_00029171	PTPN5	0.959188	0.000164786	NC_040051.1	448811	457264	-	NC_040050.1	33555266	33687317	+	--	EOA95098.1 Tyrosine-protein phosphatase non-receptor type 5, partial [Anas platyrhynchos]	Environmental Information Processing	Signal transduction	ko04010//MAPK signaling pathway	K18018	-	-	-
TCONS_00011831	--	TCONS_00029234	ADRBK1	0.963845	0.000114976	NC_040047.1	57385662	57388153	+	NC_040050.1	34086513	34092352	+	--	XP_013026042.1 PREDICTED: beta-adrenergic receptor kinase 1, partial [Anser cygnoides domesticus]	Environmental Information Processing;Cellular Processes;Human Diseases;Organismal Systems	Transport and catabolism;Substance dependence;Immune system;Signal transduction;Sensory system;Nervous system	ko04144//Endocytosis;ko04740//Olfactory transduction;ko04724//Glutamatergic synapse;ko04062//Chemokine signaling pathway;ko05032//Morphine addiction;ko04340//Hedgehog signaling pathway;ko04745//Phototransduction - fly	K00910	GO:0044424//intracellular part;GO:0005622//intracellular;GO:0005623//cell;GO:0044464//cell part	GO:0005515//protein binding;GO:0001883//purine nucleoside binding;GO:0005488//binding;GO:0031753//endothelial differentiation G-protein coupled receptor binding;GO:0001882//nucleoside binding;GO:0016773//phosphotransferase activity, alcohol group as acceptor;GO:0005102//receptor binding;GO:0097159//organic cyclic compound binding;GO:0004674//protein serine/threonine kinase activity;GO:0001664//G-…	GO:0006464//cellular protein modification process;GO:0044237//cellular metabolic process;GO:0065008//regulation of biological quality;GO:0008152//metabolic process;GO:0071704//organic substance metabolic process;GO:0050789//regulation of biological process;GO:0009966//regulation of signal transduction;GO:0044057//regulation of system process;GO:0048585//negative regulation of response to stimulus…
XR_003493025.1	--	TCONS_00029265	MYRF	0.988778	3.5e-06	NC_040075.1	85099	88781	+	NC_040050.1	34333577	34398100	+	--	XP_015718702.1 PREDICTED: myelin regulatory factor isoform X4 [Coturnix japonica]	-	-	-	-	GO:0005623//cell;GO:0044424//intracellular part;GO:0043226//organelle;GO:0043231//intracellular membrane-bounded organelle;GO:0043229//intracellular organelle;GO:0005622//intracellular;GO:0044464//cell part;GO:0043227//membrane-bounded organelle	GO:0001071//nucleic acid binding transcription factor activity	GO:0031641//regulation of myelination;GO:0016043//cellular component organization;GO:0044767//single-organism developmental process;GO:0019219//regulation of nucleobase-containing compound metabolic process;GO:0007272//ensheathment of neurons;GO:0031323//regulation of cellular metabolic process;GO:0048731//system development;GO:0010256//endomembrane system organization;GO:0048468//cell developmen…
XR_003492980.1	--	TCONS_00030086	RAG1	0.985512	7.52e-06	NC_040075.1	62684054	62685343	-	NC_040050.1	53809793	53819626	+	--	XP_005011388.1 PREDICTED: V(D)J recombination-activating protein 1 [Anas platyrhynchos]	Human Diseases;Environmental Information Processing	Signal transduction;Immune diseases	ko04068//FoxO signaling pathway;ko05340//Primary immunodeficiency	K10628	GO:0005622//intracellular;GO:0043231//intracellular membrane-bounded organelle;GO:0005623//cell;GO:0044464//cell part;GO:0043229//intracellular organelle;GO:0044424//intracellular part;GO:0043227//membrane-bounded organelle;GO:0043226//organelle	GO:0016740//transferase activity;GO:0046914//transition metal ion binding;GO:0016874//ligase activity;GO:0097159//organic cyclic compound binding;GO:0003824//catalytic activity;GO:1901363//heterocyclic compound binding;GO:0005488//binding;GO:0016788//hydrolase activity, acting on ester bonds;GO:0046983//protein dimerization activity;GO:0046872//metal ion binding;GO:0005515//protein binding;GO:000…	GO:0002520//immune system development;GO:0090304//nucleic acid metabolic process;GO:0098602//single organism cell adhesion;GO:0070229//negative regulation of lymphocyte apoptotic process;GO:0002562//somatic diversification of immune receptors via germline recombination within a single locus;GO:0010941//regulation of cell death;GO:0016337//single organismal cell-cell adhesion;GO:0016444//somatic c…
XR_002404480.2	--	TCONS_00030298	HIPK3	0.954696	0.000224627	NC_040048.1	46452115	46470181	-	NC_040050.1	62770890	62836387	+	--	XP_005022097.1 PREDICTED: homeodomain-interacting protein kinase 3 isoform X2 [Anas platyrhynchos]	Cellular Processes	Cell growth and death	ko04218//Cellular senescence	K08826	GO:0043233//organelle lumen;GO:0043227//membrane-bounded organelle;GO:0043229//intracellular organelle;GO:0005623//cell;GO:0044428//nuclear part;GO:0016604//nuclear body;GO:0044451//nucleoplasm part;GO:0005654//nucleoplasm;GO:0031974//membrane-enclosed lumen;GO:0043226//organelle;GO:0070013//intracellular organelle lumen;GO:0044446//intracellular organelle part;GO:0005634//nucleus;GO:0044464//cel…	GO:0036094//small molecule binding;GO:0005488//binding;GO:0001883//purine nucleoside binding;GO:0016301//kinase activity;GO:0016740//transferase activity;GO:0032549//ribonucleoside binding;GO:0016772//transferase activity, transferring phosphorus-containing groups;GO:0003824//catalytic activity;GO:0032550//purine ribonucleoside binding;GO:1901363//heterocyclic compound binding;GO:0004672//protein…	GO:0019438//aromatic compound biosynthetic process;GO:0034645//cellular macromolecule biosynthetic process;GO:0010646//regulation of cell communication;GO:0031323//regulation of cellular metabolic process;GO:0044092//negative regulation of molecular function;GO:0045936//negative regulation of phosphate metabolic process;GO:0009987//cellular process;GO:0009058//biosynthetic process;GO:0051246//reg…
XR_003496285.1	--	TCONS_00030298	HIPK3	0.95627	0.000202269	NC_040048.1	38866531	39280193	-	NC_040050.1	62770890	62836387	+	--	XP_005022097.1 PREDICTED: homeodomain-interacting protein kinase 3 isoform X2 [Anas platyrhynchos]	Cellular Processes	Cell growth and death	ko04218//Cellular senescence	K08826	GO:0043233//organelle lumen;GO:0043227//membrane-bounded organelle;GO:0043229//intracellular organelle;GO:0005623//cell;GO:0044428//nuclear part;GO:0016604//nuclear body;GO:0044451//nucleoplasm part;GO:0005654//nucleoplasm;GO:0031974//membrane-enclosed lumen;GO:0043226//organelle;GO:0070013//intracellular organelle lumen;GO:0044446//intracellular organelle part;GO:0005634//nucleus;GO:0044464//cel…	GO:0036094//small molecule binding;GO:0005488//binding;GO:0001883//purine nucleoside binding;GO:0016301//kinase activity;GO:0016740//transferase activity;GO:0032549//ribonucleoside binding;GO:0016772//transferase activity, transferring phosphorus-containing groups;GO:0003824//catalytic activity;GO:0032550//purine ribonucleoside binding;GO:1901363//heterocyclic compound binding;GO:0004672//protein…	GO:0019438//aromatic compound biosynthetic process;GO:0034645//cellular macromolecule biosynthetic process;GO:0010646//regulation of cell communication;GO:0031323//regulation of cellular metabolic process;GO:0044092//negative regulation of molecular function;GO:0045936//negative regulation of phosphate metabolic process;GO:0009987//cellular process;GO:0009058//biosynthetic process;GO:0051246//reg…
XR_003500147.1	--	TCONS_00030298	HIPK3	0.966724	8.98e-05	NC_040057.1	2752569	2756305	-	NC_040050.1	62770890	62836387	+	--	XP_005022097.1 PREDICTED: homeodomain-interacting protein kinase 3 isoform X2 [Anas platyrhynchos]	Cellular Processes	Cell growth and death	ko04218//Cellular senescence	K08826	GO:0043233//organelle lumen;GO:0043227//membrane-bounded organelle;GO:0043229//intracellular organelle;GO:0005623//cell;GO:0044428//nuclear part;GO:0016604//nuclear body;GO:0044451//nucleoplasm part;GO:0005654//nucleoplasm;GO:0031974//membrane-enclosed lumen;GO:0043226//organelle;GO:0070013//intracellular organelle lumen;GO:0044446//intracellular organelle part;GO:0005634//nucleus;GO:0044464//cel…	GO:0036094//small molecule binding;GO:0005488//binding;GO:0001883//purine nucleoside binding;GO:0016301//kinase activity;GO:0016740//transferase activity;GO:0032549//ribonucleoside binding;GO:0016772//transferase activity, transferring phosphorus-containing groups;GO:0003824//catalytic activity;GO:0032550//purine ribonucleoside binding;GO:1901363//heterocyclic compound binding;GO:0004672//protein…	GO:0019438//aromatic compound biosynthetic process;GO:0034645//cellular macromolecule biosynthetic process;GO:0010646//regulation of cell communication;GO:0031323//regulation of cellular metabolic process;GO:0044092//negative regulation of molecular function;GO:0045936//negative regulation of phosphate metabolic process;GO:0009987//cellular process;GO:0009058//biosynthetic process;GO:0051246//reg…
TCONS_00039315	--	TCONS_00030543	ACVR1C	0.988487	3.78e-06	NC_040053.1	26165054	26229011	+	NC_040050.1	3847815	3858633	-	--	XP_005027692.1 PREDICTED: activin receptor type-1C [Anas platyrhynchos]	Cellular Processes;Environmental Information Processing	Signaling molecules and interaction;Signal transduction;Cellular community - eukaryotes	ko04060//Cytokine-cytokine receptor interaction;ko04550//Signaling pathways regulating pluripotency of stem cells;ko04350//TGF-beta signaling pathway	K13568	GO:0043235//receptor complex;GO:0016020//membrane;GO:0031224//intrinsic component of membrane;GO:0044425//membrane part;GO:0032991//macromolecular complex;GO:0043234//protein complex	GO:1901363//heterocyclic compound binding;GO:0017002//activin-activated receptor activity;GO:0099600//transmembrane receptor activity;GO:0004872//receptor activity;GO:0004675//transmembrane receptor protein serine/threonine kinase activity;GO:0097159//organic cyclic compound binding;GO:0004871//signal transducer activity;GO:0038023//signaling receptor activity;GO:0005515//protein binding;GO:00048…	GO:2000146//negative regulation of cell motility;GO:0048518//positive regulation of biological process;GO:0009743//response to carbohydrate;GO:0051046//regulation of secretion;GO:0046883//regulation of hormone secretion;GO:0008219//cell death;GO:0007166//cell surface receptor signaling pathway;GO:0010033//response to organic substance;GO:0030334//regulation of cell migration;GO:0044267//cellular …
TCONS_00014972	--	TCONS_00031158	UNC79	0.979449	2.14e-05	NC_040047.1	51236897	51241731	-	NC_040050.1	20073358	20177180	-	--	XP_012956814.1 PREDICTED: protein unc-79 homolog isoform X4 [Anas platyrhynchos]	-	-	-	-	-	-	GO:0032501//multicellular organismal process;GO:0044708//single-organism behavior;GO:0030534//adult behavior;GO:0044707//single-multicellular organism process;GO:0040007//growth;GO:0044699//single-organism process;GO:0007610//behavior
XR_002404480.2	--	TCONS_00031158	UNC79	0.965913	9.65e-05	NC_040048.1	46452115	46470181	-	NC_040050.1	20073358	20177180	-	--	XP_012956814.1 PREDICTED: protein unc-79 homolog isoform X4 [Anas platyrhynchos]	-	-	-	-	-	-	GO:0032501//multicellular organismal process;GO:0044708//single-organism behavior;GO:0030534//adult behavior;GO:0044707//single-multicellular organism process;GO:0040007//growth;GO:0044699//single-organism process;GO:0007610//behavior
XR_003496285.1	--	TCONS_00031158	UNC79	0.977007	2.99e-05	NC_040048.1	38866531	39280193	-	NC_040050.1	20073358	20177180	-	--	XP_012956814.1 PREDICTED: protein unc-79 homolog isoform X4 [Anas platyrhynchos]	-	-	-	-	-	-	GO:0032501//multicellular organismal process;GO:0044708//single-organism behavior;GO:0030534//adult behavior;GO:0044707//single-multicellular organism process;GO:0040007//growth;GO:0044699//single-organism process;GO:0007610//behavior
XR_003492395.1	--	TCONS_00031208	TDP1	0.985824	7.05e-06	NC_040046.1	56582983	56588056	+	NC_040050.1	21755383	21797155	-	--	XP_013037800.1 PREDICTED: tyrosyl-DNA phosphodiesterase 1 [Anser cygnoides domesticus]	-	-	-	-	GO:0005623//cell;GO:0044424//intracellular part;GO:0005622//intracellular;GO:0043227//membrane-bounded organelle;GO:0043226//organelle;GO:0043231//intracellular membrane-bounded organelle;GO:0044464//cell part;GO:0043229//intracellular organelle	GO:1901363//heterocyclic compound binding;GO:0042578//phosphoric ester hydrolase activity;GO:0003824//catalytic activity;GO:0003677//DNA binding;GO:0003676//nucleic acid binding;GO:0070259//tyrosyl-DNA phosphodiesterase activity;GO:0008081//phosphoric diester hydrolase activity;GO:0016788//hydrolase activity, acting on ester bonds;GO:0005488//binding;GO:0043566//structure-specific DNA binding;GO:…	GO:0006807//nitrogen compound metabolic process;GO:0006974//cellular response to DNA damage stimulus;GO:1901360//organic cyclic compound metabolic process;GO:0033554//cellular response to stress;GO:0090304//nucleic acid metabolic process;GO:0034641//cellular nitrogen compound metabolic process;GO:0043170//macromolecule metabolic process;GO:0051716//cellular response to stimulus;GO:0044238//primar…
XR_003496344.1	--	TCONS_00031208	TDP1	0.999921	1.23e-12	NC_040048.1	40261803	40355065	-	NC_040050.1	21755383	21797155	-	--	XP_013037800.1 PREDICTED: tyrosyl-DNA phosphodiesterase 1 [Anser cygnoides domesticus]	-	-	-	-	GO:0005623//cell;GO:0044424//intracellular part;GO:0005622//intracellular;GO:0043227//membrane-bounded organelle;GO:0043226//organelle;GO:0043231//intracellular membrane-bounded organelle;GO:0044464//cell part;GO:0043229//intracellular organelle	GO:1901363//heterocyclic compound binding;GO:0042578//phosphoric ester hydrolase activity;GO:0003824//catalytic activity;GO:0003677//DNA binding;GO:0003676//nucleic acid binding;GO:0070259//tyrosyl-DNA phosphodiesterase activity;GO:0008081//phosphoric diester hydrolase activity;GO:0016788//hydrolase activity, acting on ester bonds;GO:0005488//binding;GO:0043566//structure-specific DNA binding;GO:…	GO:0006807//nitrogen compound metabolic process;GO:0006974//cellular response to DNA damage stimulus;GO:1901360//organic cyclic compound metabolic process;GO:0033554//cellular response to stress;GO:0090304//nucleic acid metabolic process;GO:0034641//cellular nitrogen compound metabolic process;GO:0043170//macromolecule metabolic process;GO:0051716//cellular response to stimulus;GO:0044238//primar…
XR_003497816.1	--	TCONS_00031797	RIC8A	0.965151	0.000103064	NC_040050.1	30895238	30900671	-	NC_040050.1	35820111	35841469	-	--	XP_005030249.1 PREDICTED: synembryn-A [Anas platyrhynchos]	-	-	-	-	GO:0044424//intracellular part;GO:0005623//cell;GO:0044464//cell part;GO:0016020//membrane;GO:0005622//intracellular	-	GO:0032501//multicellular organismal process;GO:0007188//adenylate cyclase-modulating G-protein coupled receptor signaling pathway;GO:0051336//regulation of hydrolase activity;GO:0050896//response to stimulus;GO:0007369//gastrulation;GO:0009790//embryo development;GO:0050789//regulation of biological process;GO:0044767//single-organism developmental process;GO:0071840//cellular component organiza…
TCONS_00013863	--	TCONS_00031946	ZNF106	0.999995	3.95e-16	NC_040047.1	8063750	8071725	-	NC_040050.1	38620823	38660253	-	--	XP_005021740.1 PREDICTED: zinc finger protein 106 isoform X1 [Anas platyrhynchos]	-	-	-	-	GO:0005622//intracellular;GO:0044424//intracellular part;GO:0005737//cytoplasm;GO:0044444//cytoplasmic part;GO:0005623//cell;GO:0044464//cell part	GO:0003723//RNA binding;GO:0097159//organic cyclic compound binding;GO:0019904//protein domain specific binding;GO:0003676//nucleic acid binding;GO:1901363//heterocyclic compound binding;GO:0043167//ion binding;GO:0043169//cation binding;GO:0005488//binding;GO:0005515//protein binding	GO:0007166//cell surface receptor signaling pathway;GO:0044763//single-organism cellular process;GO:0050789//regulation of biological process;GO:0050794//regulation of cellular process;GO:0044699//single-organism process;GO:0050896//response to stimulus;GO:0007154//cell communication;GO:0007169//transmembrane receptor protein tyrosine kinase signaling pathway;GO:0065007//biological regulation;GO:…
TCONS_00022524	--	TCONS_00031946	ZNF106	0.963177	0.000121407	NC_040048.1	81609402	81634477	-	NC_040050.1	38620823	38660253	-	--	XP_005021740.1 PREDICTED: zinc finger protein 106 isoform X1 [Anas platyrhynchos]	-	-	-	-	GO:0005622//intracellular;GO:0044424//intracellular part;GO:0005737//cytoplasm;GO:0044444//cytoplasmic part;GO:0005623//cell;GO:0044464//cell part	GO:0003723//RNA binding;GO:0097159//organic cyclic compound binding;GO:0019904//protein domain specific binding;GO:0003676//nucleic acid binding;GO:1901363//heterocyclic compound binding;GO:0043167//ion binding;GO:0043169//cation binding;GO:0005488//binding;GO:0005515//protein binding	GO:0007166//cell surface receptor signaling pathway;GO:0044763//single-organism cellular process;GO:0050789//regulation of biological process;GO:0050794//regulation of cellular process;GO:0044699//single-organism process;GO:0050896//response to stimulus;GO:0007154//cell communication;GO:0007169//transmembrane receptor protein tyrosine kinase signaling pathway;GO:0065007//biological regulation;GO:…
TCONS_00004331	--	TCONS_00032200	GREM1	0.959185	0.000164818	NC_040046.1	170855303	170879013	+	NC_040050.1	43914269	43923762	-	--	XP_012954349.1 PREDICTED: gremlin-1 [Anas platyrhynchos]	-	-	-	-	GO:0044421//extracellular region part;GO:0005623//cell;GO:0044464//cell part;GO:0005576//extracellular region	GO:0019209//kinase activator activity;GO:0005126//cytokine receptor binding;GO:0005488//binding;GO:0098772//molecular function regulator;GO:0070851//growth factor receptor binding;GO:0030234//enzyme regulator activity;GO:0019207//kinase regulator activity;GO:0030296//protein tyrosine kinase activator activity;GO:0030295//protein kinase activator activity;GO:0005102//receptor binding;GO:0019887//p…	GO:0065009//regulation of molecular function;GO:0016477//cell migration;GO:0050789//regulation of biological process;GO:0003002//regionalization;GO:0031952//regulation of protein autophosphorylation;GO:0051052//regulation of DNA metabolic process;GO:0051239//regulation of multicellular organismal process;GO:0001934//positive regulation of protein phosphorylation;GO:0010468//regulation of gene exp…
TCONS_00035441	--	TCONS_00032200	GREM1	0.955454	0.000213663	NC_040052.1	1410970	1417508	+	NC_040050.1	43914269	43923762	-	--	XP_012954349.1 PREDICTED: gremlin-1 [Anas platyrhynchos]	-	-	-	-	GO:0044421//extracellular region part;GO:0005623//cell;GO:0044464//cell part;GO:0005576//extracellular region	GO:0019209//kinase activator activity;GO:0005126//cytokine receptor binding;GO:0005488//binding;GO:0098772//molecular function regulator;GO:0070851//growth factor receptor binding;GO:0030234//enzyme regulator activity;GO:0019207//kinase regulator activity;GO:0030296//protein tyrosine kinase activator activity;GO:0030295//protein kinase activator activity;GO:0005102//receptor binding;GO:0019887//p…	GO:0065009//regulation of molecular function;GO:0016477//cell migration;GO:0050789//regulation of biological process;GO:0003002//regionalization;GO:0031952//regulation of protein autophosphorylation;GO:0051052//regulation of DNA metabolic process;GO:0051239//regulation of multicellular organismal process;GO:0001934//positive regulation of protein phosphorylation;GO:0010468//regulation of gene exp…
TCONS_00050591	--	TCONS_00032308	HEATR5A	0.990678	2.01e-06	NC_040058.1	21800319	21812271	-	NC_040050.1	48214204	48277289	-	--	XP_012956065.1 PREDICTED: HEAT repeat-containing protein 5A isoform X5 [Anas platyrhynchos]	-	-	-	-	-	-	-
XR_002401453.2	--	TCONS_00032308	HEATR5A	0.963827	0.000115143	NC_040046.1	21595460	21629325	-	NC_040050.1	48214204	48277289	-	--	XP_012956065.1 PREDICTED: HEAT repeat-containing protein 5A isoform X5 [Anas platyrhynchos]	-	-	-	-	-	-	-
TCONS_00024716	--	TCONS_00032466	-	0.963553	0.000117755	NC_040049.1	42469061	42482288	+	NC_040050.1	56807110	56817224	-	--	AAP88020.1 reverse transcriptase, partial [Chelonia mydas]	-	-	-	-	-	-	-
TCONS_00027847	--	TCONS_00032466	-	0.952104	0.000264913	NC_040049.1	70309937	70330318	-	NC_040050.1	56807110	56817224	-	--	AAP88020.1 reverse transcriptase, partial [Chelonia mydas]	-	-	-	-	-	-	-
TCONS_00044239	--	TCONS_00032466	-	0.970664	6.17e-05	NC_040055.1	14408228	14499956	+	NC_040050.1	56807110	56817224	-	--	AAP88020.1 reverse transcriptase, partial [Chelonia mydas]	-	-	-	-	-	-	-
XR_003500093.1	--	TCONS_00032466	-	0.955529	0.000212607	NC_040057.1	12378042	12386253	-	NC_040050.1	56807110	56817224	-	--	AAP88020.1 reverse transcriptase, partial [Chelonia mydas]	-	-	-	-	-	-	-
XR_002398923.2	--	TCONS_00032576	Nr1h3	-0.975083	3.8e-05	NC_040064.1	849539	901316	-	NC_040050.1	57774642	57805883	-	--	XP_005028767.1 PREDICTED: oxysterols receptor LXR-alpha [Anas platyrhynchos]	Human Diseases;Organismal Systems	Infectious diseases;Endocrine and metabolic diseases;Endocrine system	ko05160//Hepatitis C;ko04931//Insulin resistance;ko04932//Non-alcoholic fatty liver disease (NAFLD);ko03320//PPAR signaling pathway	K08536	GO:0043227//membrane-bounded organelle;GO:0043231//intracellular membrane-bounded organelle;GO:0005623//cell;GO:0005622//intracellular;GO:0044424//intracellular part;GO:0043229//intracellular organelle;GO:0044464//cell part;GO:0043226//organelle	GO:0001071//nucleic acid binding transcription factor activity;GO:0001012//RNA polymerase II regulatory region DNA binding;GO:0004872//receptor activity;GO:0004871//signal transducer activity;GO:0044212//transcription regulatory region DNA binding;GO:0001067//regulatory region nucleic acid binding;GO:0097159//organic cyclic compound binding;GO:0046872//metal ion binding;GO:0043169//cation binding…	GO:1901700//response to oxygen-containing compound;GO:0044763//single-organism cellular process;GO:0044238//primary metabolic process;GO:0051252//regulation of RNA metabolic process;GO:0051223//regulation of protein transport;GO:0051051//negative regulation of transport;GO:0070201//regulation of establishment of protein localization;GO:0002237//response to molecule of bacterial origin;GO:0042592/…
TCONS_00047824	--	TCONS_00035318	DDIT4	0.965371	0.000101135	NC_040057.1	8361864	8369307	+	NC_040051.1	32327679	32329172	-	--	XP_011586095.1 PREDICTED: DNA damage-inducible transcript 4 protein [Aquila chrysaetos canadensis]	Environmental Information Processing;Cellular Processes;Human Diseases	Cancers;Transport and catabolism;Signal transduction	ko04151//PI3K-Akt signaling pathway;ko05206//MicroRNAs in cancer;ko04140//Autophagy - animal;ko04150//mTOR signaling pathway	K08270	GO:0005623//cell;GO:0005622//intracellular;GO:0044464//cell part;GO:0044424//intracellular part;GO:0043226//organelle;GO:0043227//membrane-bounded organelle;GO:0043229//intracellular organelle;GO:0043231//intracellular membrane-bounded organelle	GO:0005488//binding;GO:0005515//protein binding	GO:0008219//cell death;GO:0006974//cellular response to DNA damage stimulus;GO:0009894//regulation of catabolic process;GO:0016265//death;GO:0009966//regulation of signal transduction;GO:0019220//regulation of phosphate metabolic process;GO:0043933//macromolecular complex subunit organization;GO:1900542//regulation of purine nucleotide metabolic process;GO:0050789//regulation of biological proces…
TCONS_00016906	--	TCONS_00035323	PPA1	0.954797	0.00022315	NC_040047.1	144027705	144032766	-	NC_040051.1	32359405	32369379	-	--	XP_005028394.1 PREDICTED: inorganic pyrophosphatase isoform X1 [Anas platyrhynchos]	Metabolism	Energy metabolism	ko00190//Oxidative phosphorylation	K01507	GO:0005622//intracellular;GO:0005623//cell;GO:0043227//membrane-bounded organelle;GO:0031982//vesicle;GO:0044464//cell part;GO:0043226//organelle;GO:0031988//membrane-bounded vesicle;GO:0044424//intracellular part	GO:0016462//pyrophosphatase activity;GO:0016817//hydrolase activity, acting on acid anhydrides;GO:0003824//catalytic activity;GO:0016787//hydrolase activity;GO:0016818//hydrolase activity, acting on acid anhydrides, in phosphorus-containing anhydrides	GO:0006793//phosphorus metabolic process;GO:0008152//metabolic process;GO:0044237//cellular metabolic process;GO:0009987//cellular process
XR_003493165.1	--	TCONS_00035323	PPA1	0.953594	0.000241231	NC_040075.1	45717924	45724767	+	NC_040051.1	32359405	32369379	-	--	XP_005028394.1 PREDICTED: inorganic pyrophosphatase isoform X1 [Anas platyrhynchos]	Metabolism	Energy metabolism	ko00190//Oxidative phosphorylation	K01507	GO:0005622//intracellular;GO:0005623//cell;GO:0043227//membrane-bounded organelle;GO:0031982//vesicle;GO:0044464//cell part;GO:0043226//organelle;GO:0031988//membrane-bounded vesicle;GO:0044424//intracellular part	GO:0016462//pyrophosphatase activity;GO:0016817//hydrolase activity, acting on acid anhydrides;GO:0003824//catalytic activity;GO:0016787//hydrolase activity;GO:0016818//hydrolase activity, acting on acid anhydrides, in phosphorus-containing anhydrides	GO:0006793//phosphorus metabolic process;GO:0008152//metabolic process;GO:0044237//cellular metabolic process;GO:0009987//cellular process
XR_003494597.1	--	TCONS_00035323	PPA1	0.99282	9.2e-07	NC_040046.1	143687288	143707602	+	NC_040051.1	32359405	32369379	-	--	XP_005028394.1 PREDICTED: inorganic pyrophosphatase isoform X1 [Anas platyrhynchos]	Metabolism	Energy metabolism	ko00190//Oxidative phosphorylation	K01507	GO:0005622//intracellular;GO:0005623//cell;GO:0043227//membrane-bounded organelle;GO:0031982//vesicle;GO:0044464//cell part;GO:0043226//organelle;GO:0031988//membrane-bounded vesicle;GO:0044424//intracellular part	GO:0016462//pyrophosphatase activity;GO:0016817//hydrolase activity, acting on acid anhydrides;GO:0003824//catalytic activity;GO:0016787//hydrolase activity;GO:0016818//hydrolase activity, acting on acid anhydrides, in phosphorus-containing anhydrides	GO:0006793//phosphorus metabolic process;GO:0008152//metabolic process;GO:0044237//cellular metabolic process;GO:0009987//cellular process
XR_003500673.1	--	TCONS_00035323	PPA1	0.974563	4.04e-05	NC_040060.1	6859412	7037567	-	NC_040051.1	32359405	32369379	-	--	XP_005028394.1 PREDICTED: inorganic pyrophosphatase isoform X1 [Anas platyrhynchos]	Metabolism	Energy metabolism	ko00190//Oxidative phosphorylation	K01507	GO:0005622//intracellular;GO:0005623//cell;GO:0043227//membrane-bounded organelle;GO:0031982//vesicle;GO:0044464//cell part;GO:0043226//organelle;GO:0031988//membrane-bounded vesicle;GO:0044424//intracellular part	GO:0016462//pyrophosphatase activity;GO:0016817//hydrolase activity, acting on acid anhydrides;GO:0003824//catalytic activity;GO:0016787//hydrolase activity;GO:0016818//hydrolase activity, acting on acid anhydrides, in phosphorus-containing anhydrides	GO:0006793//phosphorus metabolic process;GO:0008152//metabolic process;GO:0044237//cellular metabolic process;GO:0009987//cellular process
TCONS_00014972	--	TCONS_00035664	-	0.965295	0.000101795	NC_040047.1	51236897	51241731	-	NC_040052.1	6748877	6752530	+	--	-	-	-	-	-	-	-	-
XR_002404480.2	--	TCONS_00035664	-	0.994708	3.69e-07	NC_040048.1	46452115	46470181	-	NC_040052.1	6748877	6752530	+	--	-	-	-	-	-	-	-	-
XR_003496285.1	--	TCONS_00035664	-	0.978614	2.41e-05	NC_040048.1	38866531	39280193	-	NC_040052.1	6748877	6752530	+	--	-	-	-	-	-	-	-	-
XR_216898.4	--	TCONS_00035664	-	0.969851	6.7e-05	NC_040049.1	33913044	33922295	-	NC_040052.1	6748877	6752530	+	--	-	-	-	-	-	-	-	-
XR_003496728.1	--	TCONS_00036319	fastkd1	0.965538	9.97e-05	NC_040049.1	70548457	70550082	-	NC_040052.1	23727408	23746233	+	--	XP_005018995.1 PREDICTED: FAST kinase domain-containing protein 1 isoform X1 [Anas platyrhynchos]	-	-	-	-	GO:0043226//organelle;GO:0044464//cell part;GO:0005622//intracellular;GO:0043229//intracellular organelle;GO:0043227//membrane-bounded organelle;GO:0005623//cell;GO:0043231//intracellular membrane-bounded organelle;GO:0044424//intracellular part	GO:0005488//binding;GO:0097159//organic cyclic compound binding;GO:1901363//heterocyclic compound binding;GO:0003723//RNA binding;GO:0003676//nucleic acid binding	GO:0043170//macromolecule metabolic process;GO:0044238//primary metabolic process;GO:0006464//cellular protein modification process;GO:0071704//organic substance metabolic process;GO:0036211//protein modification process;GO:0043412//macromolecule modification;GO:0009987//cellular process;GO:0019538//protein metabolic process;GO:0008152//metabolic process;GO:0044260//cellular macromolecule metabol…
TCONS_00069861	--	TCONS_00036628	LCT	0.977497	2.8e-05	NW_020865203.1	14680	20907	-	NC_040052.1	33047218	33069240	+	--	XP_012955798.1 PREDICTED: lactase-phlorizin hydrolase isoform X1 [Anas platyrhynchos]	Metabolism;Organismal Systems	Digestive system;Global and overview maps;Carbohydrate metabolism	ko01100//Metabolic pathways;ko04973//Carbohydrate digestion and absorption;ko00052//Galactose metabolism	K01229	GO:0044464//cell part;GO:0005622//intracellular;GO:0044424//intracellular part;GO:0043229//intracellular organelle;GO:0043231//intracellular membrane-bounded organelle;GO:0032991//macromolecular complex;GO:0043234//protein complex;GO:0005623//cell;GO:0043227//membrane-bounded organelle;GO:0043226//organelle	GO:0003676//nucleic acid binding;GO:0097367//carbohydrate derivative binding;GO:0001883//purine nucleoside binding;GO:0016818//hydrolase activity, acting on acid anhydrides, in phosphorus-containing anhydrides;GO:0001882//nucleoside binding;GO:0004386//helicase activity;GO:1901363//heterocyclic compound binding;GO:0005488//binding;GO:0097159//organic cyclic compound binding;GO:0016817//hydrolase …	GO:0034641//cellular nitrogen compound metabolic process;GO:0071704//organic substance metabolic process;GO:0016043//cellular component organization;GO:0006259//DNA metabolic process;GO:0090304//nucleic acid metabolic process;GO:0009987//cellular process;GO:0071840//cellular component organization or biogenesis;GO:0006139//nucleobase-containing compound metabolic process;GO:0043170//macromolecule…
XR_002398923.2	--	TCONS_00036628	LCT	0.994606	3.91e-07	NC_040064.1	849539	901316	-	NC_040052.1	33047218	33069240	+	--	XP_012955798.1 PREDICTED: lactase-phlorizin hydrolase isoform X1 [Anas platyrhynchos]	Metabolism;Organismal Systems	Digestive system;Global and overview maps;Carbohydrate metabolism	ko01100//Metabolic pathways;ko04973//Carbohydrate digestion and absorption;ko00052//Galactose metabolism	K01229	GO:0044464//cell part;GO:0005622//intracellular;GO:0044424//intracellular part;GO:0043229//intracellular organelle;GO:0043231//intracellular membrane-bounded organelle;GO:0032991//macromolecular complex;GO:0043234//protein complex;GO:0005623//cell;GO:0043227//membrane-bounded organelle;GO:0043226//organelle	GO:0003676//nucleic acid binding;GO:0097367//carbohydrate derivative binding;GO:0001883//purine nucleoside binding;GO:0016818//hydrolase activity, acting on acid anhydrides, in phosphorus-containing anhydrides;GO:0001882//nucleoside binding;GO:0004386//helicase activity;GO:1901363//heterocyclic compound binding;GO:0005488//binding;GO:0097159//organic cyclic compound binding;GO:0016817//hydrolase …	GO:0034641//cellular nitrogen compound metabolic process;GO:0071704//organic substance metabolic process;GO:0016043//cellular component organization;GO:0006259//DNA metabolic process;GO:0090304//nucleic acid metabolic process;GO:0009987//cellular process;GO:0071840//cellular component organization or biogenesis;GO:0006139//nucleobase-containing compound metabolic process;GO:0043170//macromolecule…
XR_003496728.1	--	TCONS_00036628	LCT	0.968821	7.4e-05	NC_040049.1	70548457	70550082	-	NC_040052.1	33047218	33069240	+	--	XP_012955798.1 PREDICTED: lactase-phlorizin hydrolase isoform X1 [Anas platyrhynchos]	Metabolism;Organismal Systems	Digestive system;Global and overview maps;Carbohydrate metabolism	ko01100//Metabolic pathways;ko04973//Carbohydrate digestion and absorption;ko00052//Galactose metabolism	K01229	GO:0044464//cell part;GO:0005622//intracellular;GO:0044424//intracellular part;GO:0043229//intracellular organelle;GO:0043231//intracellular membrane-bounded organelle;GO:0032991//macromolecular complex;GO:0043234//protein complex;GO:0005623//cell;GO:0043227//membrane-bounded organelle;GO:0043226//organelle	GO:0003676//nucleic acid binding;GO:0097367//carbohydrate derivative binding;GO:0001883//purine nucleoside binding;GO:0016818//hydrolase activity, acting on acid anhydrides, in phosphorus-containing anhydrides;GO:0001882//nucleoside binding;GO:0004386//helicase activity;GO:1901363//heterocyclic compound binding;GO:0005488//binding;GO:0097159//organic cyclic compound binding;GO:0016817//hydrolase …	GO:0034641//cellular nitrogen compound metabolic process;GO:0071704//organic substance metabolic process;GO:0016043//cellular component organization;GO:0006259//DNA metabolic process;GO:0090304//nucleic acid metabolic process;GO:0009987//cellular process;GO:0071840//cellular component organization or biogenesis;GO:0006139//nucleobase-containing compound metabolic process;GO:0043170//macromolecule…
XR_002399604.2	--	TCONS_00037643	CREB1	0.960977	0.00014425	NC_040048.1	68697812	68710496	+	NC_040052.1	16823746	16843826	-	--	XP_005049211.1 PREDICTED: cyclic AMP-responsive element-binding protein 1 isoform X2 [Ficedula albicollis]	Organismal Systems;Human Diseases;Environmental Information Processing	Aging;Endocrine and metabolic diseases;Substance dependence;Circulatory system;Infectious diseases;Neurodegenerative diseases;Immune system;Excretory system;Endocrine system;Cancers;Nervous system;Signal transduction;Development;Environmental adaptation	ko05165//Human papillomavirus infection;ko04151//PI3K-Akt signaling pathway;ko04024//cAMP signaling pathway;ko04022//cGMP - PKG signaling pathway;ko05166//HTLV-I infection;ko04261//Adrenergic signaling in cardiomyocytes;ko04934//Cushing syndrome;ko05163//Human cytomegalovirus infection;ko05203//Viral carcinogenesis;ko05152//Tuberculosis;ko04728//Dopaminergic synapse;ko05167//Kaposi sarcoma-associ…	K05870	GO:0044422//organelle part;GO:0043226//organelle;GO:0005623//cell;GO:0005634//nucleus;GO:0031974//membrane-enclosed lumen;GO:0044424//intracellular part;GO:0043232//intracellular non-membrane-bounded organelle;GO:0043234//protein complex;GO:0043229//intracellular organelle;GO:0031981//nuclear lumen;GO:0070013//intracellular organelle lumen;GO:0005622//intracellular;GO:0044464//cell part;GO:004442…	GO:0000988//transcription factor activity, protein binding;GO:0000977//RNA polymerase II regulatory region sequence-specific DNA binding;GO:0001085//RNA polymerase II transcription factor binding;GO:0005515//protein binding;GO:0003690//double-stranded DNA binding;GO:0000981//RNA polymerase II transcription factor activity, sequence-specific DNA binding;GO:0003677//DNA binding;GO:0001012//RNA poly…	GO:0010646//regulation of cell communication;GO:0090066//regulation of anatomical structure size;GO:0051234//establishment of localization;GO:0051094//positive regulation of developmental process;GO:0048731//system development;GO:2000113//negative regulation of cellular macromolecule biosynthetic process;GO:0031326//regulation of cellular biosynthetic process;GO:0048523//negative regulation of ce…
XR_002398923.2	--	TCONS_00037954	CERS6	0.959114	0.000165668	NC_040064.1	849539	901316	-	NC_040052.1	24036447	24124216	-	--	XP_012954310.1 PREDICTED: ceramide synthase 6 [Anas platyrhynchos]	Environmental Information Processing;Metabolism	Signal transduction;Global and overview maps;Lipid metabolism	ko01100//Metabolic pathways;ko04071//Sphingolipid signaling pathway;ko00600//Sphingolipid metabolism	K04710	-	-	-
XR_003492943.1	--	TCONS_00038401	-	0.958658	0.000171222	NC_040075.1	63185899	63189487	+	NC_040052.1	36709236	36722949	-	--	-	-	-	-	-	-	-	-
TCONS_00024716	--	TCONS_00039449	NOS1AP	0.952252	0.00026249	NC_040049.1	42469061	42482288	+	NC_040053.1	27894591	27916933	+	--	XP_004943208.1 PREDICTED: carboxyl-terminal PDZ ligand of neuronal nitric oxide synthase protein isoform X2 [Gallus gallus]	Organismal Systems	Environmental adaptation	ko04713//Circadian entrainment	K16513	-	-	-
TCONS_00067216	--	TCONS_00039832	Ank3	0.953081	0.000249215	NC_040075.1	45717588	45729137	+	NC_040053.1	1462720	1800575	-	--	XP_015143560.1 PREDICTED: ankyrin-3 isoform X9 [Gallus gallus]	Organismal Systems;Human Diseases	Immune system;Cancers	ko05205//Proteoglycans in cancer;ko04624//Toll and Imd signaling pathway	K10380	-	-	-
XR_002399293.2	--	TCONS_00039832	Ank3	0.953361	0.000244834	NC_040051.1	15472900	15475692	+	NC_040053.1	1462720	1800575	-	--	XP_015143560.1 PREDICTED: ankyrin-3 isoform X9 [Gallus gallus]	Organismal Systems;Human Diseases	Immune system;Cancers	ko05205//Proteoglycans in cancer;ko04624//Toll and Imd signaling pathway	K10380	-	-	-
XR_003495931.1	--	TCONS_00039832	Ank3	0.962797	0.000125161	NC_040048.1	2773673	2820105	+	NC_040053.1	1462720	1800575	-	--	XP_015143560.1 PREDICTED: ankyrin-3 isoform X9 [Gallus gallus]	Organismal Systems;Human Diseases	Immune system;Cancers	ko05205//Proteoglycans in cancer;ko04624//Toll and Imd signaling pathway	K10380	-	-	-
XR_003500673.1	--	TCONS_00039832	Ank3	0.961034	0.000143618	NC_040060.1	6859412	7037567	-	NC_040053.1	1462720	1800575	-	--	XP_015143560.1 PREDICTED: ankyrin-3 isoform X9 [Gallus gallus]	Organismal Systems;Human Diseases	Immune system;Cancers	ko05205//Proteoglycans in cancer;ko04624//Toll and Imd signaling pathway	K10380	-	-	-
TCONS_00041892	--	TCONS_00040227	DAB1	0.994592	3.94e-07	NC_040054.1	10486383	10510102	+	NC_040053.1	8482222	8627758	-	--	XP_011570431.1 PREDICTED: disabled homolog 1 isoform X1 [Aquila chrysaetos canadensis]	-	-	-	-	-	-	-
TCONS_00045460	--	TCONS_00040227	DAB1	0.952568	0.000257376	NC_040056.1	4309249	4452911	+	NC_040053.1	8482222	8627758	-	--	XP_011570431.1 PREDICTED: disabled homolog 1 isoform X1 [Aquila chrysaetos canadensis]	-	-	-	-	-	-	-
XR_002401731.2	--	TCONS_00040227	DAB1	0.969566	6.89e-05	NC_040053.1	35192537	35197417	+	NC_040053.1	8482222	8627758	-	--	XP_011570431.1 PREDICTED: disabled homolog 1 isoform X1 [Aquila chrysaetos canadensis]	-	-	-	-	-	-	-
XR_003497934.1	--	TCONS_00040227	DAB1	0.952391	0.000260232	NC_040051.1	26348029	26575846	+	NC_040053.1	8482222	8627758	-	--	XP_011570431.1 PREDICTED: disabled homolog 1 isoform X1 [Aquila chrysaetos canadensis]	-	-	-	-	-	-	-
XR_003501057.1	--	TCONS_00040227	DAB1	0.997596	3.47e-08	NC_040063.1	8275910	8287160	-	NC_040053.1	8482222	8627758	-	--	XP_011570431.1 PREDICTED: disabled homolog 1 isoform X1 [Aquila chrysaetos canadensis]	-	-	-	-	-	-	-
TCONS_00008389	--	TCONS_00040279	TCEANC2	0.960631	0.000148078	NC_040046.1	129859216	129875551	-	NC_040053.1	9692266	9698199	-	--	EOB00370.1 Uncharacterized protein C1orf83, partial [Anas platyrhynchos]	-	-	-	-	-	-	-
TCONS_00011835	--	TCONS_00040279	TCEANC2	0.974901	3.88e-05	NC_040047.1	57408380	57409820	+	NC_040053.1	9692266	9698199	-	--	EOB00370.1 Uncharacterized protein C1orf83, partial [Anas platyrhynchos]	-	-	-	-	-	-	-
TCONS_00023690	--	TCONS_00040279	TCEANC2	0.974772	3.94e-05	NC_040049.1	7077553	7084395	+	NC_040053.1	9692266	9698199	-	--	EOB00370.1 Uncharacterized protein C1orf83, partial [Anas platyrhynchos]	-	-	-	-	-	-	-
TCONS_00023693	--	TCONS_00040279	TCEANC2	0.959339	0.000162975	NC_040049.1	7085229	7088193	+	NC_040053.1	9692266	9698199	-	--	EOB00370.1 Uncharacterized protein C1orf83, partial [Anas platyrhynchos]	-	-	-	-	-	-	-
TCONS_00061153	--	TCONS_00040279	TCEANC2	0.958976	0.000167335	NC_040067.1	4282222	4303667	+	NC_040053.1	9692266	9698199	-	--	EOB00370.1 Uncharacterized protein C1orf83, partial [Anas platyrhynchos]	-	-	-	-	-	-	-
XR_001191758.3	--	TCONS_00040279	TCEANC2	0.964501	0.000108879	NC_040050.1	41581064	41582802	+	NC_040053.1	9692266	9698199	-	--	EOB00370.1 Uncharacterized protein C1orf83, partial [Anas platyrhynchos]	-	-	-	-	-	-	-
XR_002404149.2	--	TCONS_00040279	TCEANC2	0.979768	2.04e-05	NC_040049.1	75102297	75111170	+	NC_040053.1	9692266	9698199	-	--	EOB00370.1 Uncharacterized protein C1orf83, partial [Anas platyrhynchos]	-	-	-	-	-	-	-
XR_002404603.2	--	TCONS_00040279	TCEANC2	0.972767	4.95e-05	NW_020865824.1	26310	33485	-	NC_040053.1	9692266	9698199	-	--	EOB00370.1 Uncharacterized protein C1orf83, partial [Anas platyrhynchos]	-	-	-	-	-	-	-
XR_003492494.1	--	TCONS_00040279	TCEANC2	0.959408	0.000162161	NC_040070.1	4732667	4879343	-	NC_040053.1	9692266	9698199	-	--	EOB00370.1 Uncharacterized protein C1orf83, partial [Anas platyrhynchos]	-	-	-	-	-	-	-
XR_003493829.1	--	TCONS_00040279	TCEANC2	0.966775	8.94e-05	NW_020865675.1	36803	38302	+	NC_040053.1	9692266	9698199	-	--	EOB00370.1 Uncharacterized protein C1orf83, partial [Anas platyrhynchos]	-	-	-	-	-	-	-
XR_003494933.1	--	TCONS_00040279	TCEANC2	0.993492	6.86e-07	NC_040046.1	122057549	122059719	+	NC_040053.1	9692266	9698199	-	--	EOB00370.1 Uncharacterized protein C1orf83, partial [Anas platyrhynchos]	-	-	-	-	-	-	-
XR_003496543.1	--	TCONS_00040279	TCEANC2	0.966537	9.13e-05	NC_040048.1	81233801	81241482	+	NC_040053.1	9692266	9698199	-	--	EOB00370.1 Uncharacterized protein C1orf83, partial [Anas platyrhynchos]	-	-	-	-	-	-	-
XR_003497509.1	--	TCONS_00040279	TCEANC2	0.993452	6.99e-07	NC_040050.1	61187374	61379338	-	NC_040053.1	9692266	9698199	-	--	EOB00370.1 Uncharacterized protein C1orf83, partial [Anas platyrhynchos]	-	-	-	-	-	-	-
XR_003498740.1	--	TCONS_00040279	TCEANC2	0.966182	9.43e-05	NC_040053.1	27267622	27367643	+	NC_040053.1	9692266	9698199	-	--	EOB00370.1 Uncharacterized protein C1orf83, partial [Anas platyrhynchos]	-	-	-	-	-	-	-
XR_003501547.1	--	TCONS_00040279	TCEANC2	0.967925	8.05e-05	NC_040066.1	4470374	4504211	+	NC_040053.1	9692266	9698199	-	--	EOB00370.1 Uncharacterized protein C1orf83, partial [Anas platyrhynchos]	-	-	-	-	-	-	-
XR_003494014.1	--	TCONS_00040543	USP33	0.955658	0.000210774	NW_020866079.1	9003	9887	+	NC_040053.1	16551579	16587631	-	--	XP_012959727.1 PREDICTED: ubiquitin carboxyl-terminal hydrolase 33 isoform X4 [Anas platyrhynchos]	-	-	-	-	GO:0044464//cell part;GO:0005622//intracellular;GO:0044430//cytoskeletal part;GO:0044422//organelle part;GO:0005856//cytoskeleton;GO:0015630//microtubule cytoskeleton;GO:0044446//intracellular organelle part;GO:0044424//intracellular part;GO:0005623//cell;GO:0043226//organelle;GO:0043229//intracellular organelle;GO:0005815//microtubule organizing center;GO:0043228//non-membrane-bounded organelle;…	GO:0005488//binding;GO:0016787//hydrolase activity;GO:0043167//ion binding;GO:0019783//ubiquitin-like protein-specific protease activity;GO:0036459//thiol-dependent ubiquitinyl hydrolase activity;GO:0046872//metal ion binding;GO:0043169//cation binding;GO:0101005//ubiquitinyl hydrolase activity;GO:0003824//catalytic activity;GO:0008234//cysteine-type peptidase activity;GO:0008233//peptidase activ…	GO:0007186//G-protein coupled receptor signaling pathway;GO:0040011//locomotion;GO:0009605//response to external stimulus;GO:0050789//regulation of biological process;GO:0044763//single-organism cellular process;GO:0030030//cell projection organization;GO:0051179//localization;GO:0071704//organic substance metabolic process;GO:0007165//signal transduction;GO:0008152//metabolic process;GO:0050896/…
XR_003496344.1	--	TCONS_00040543	USP33	0.962182	0.000131412	NC_040048.1	40261803	40355065	-	NC_040053.1	16551579	16587631	-	--	XP_012959727.1 PREDICTED: ubiquitin carboxyl-terminal hydrolase 33 isoform X4 [Anas platyrhynchos]	-	-	-	-	GO:0044464//cell part;GO:0005622//intracellular;GO:0044430//cytoskeletal part;GO:0044422//organelle part;GO:0005856//cytoskeleton;GO:0015630//microtubule cytoskeleton;GO:0044446//intracellular organelle part;GO:0044424//intracellular part;GO:0005623//cell;GO:0043226//organelle;GO:0043229//intracellular organelle;GO:0005815//microtubule organizing center;GO:0043228//non-membrane-bounded organelle;…	GO:0005488//binding;GO:0016787//hydrolase activity;GO:0043167//ion binding;GO:0019783//ubiquitin-like protein-specific protease activity;GO:0036459//thiol-dependent ubiquitinyl hydrolase activity;GO:0046872//metal ion binding;GO:0043169//cation binding;GO:0101005//ubiquitinyl hydrolase activity;GO:0003824//catalytic activity;GO:0008234//cysteine-type peptidase activity;GO:0008233//peptidase activ…	GO:0007186//G-protein coupled receptor signaling pathway;GO:0040011//locomotion;GO:0009605//response to external stimulus;GO:0050789//regulation of biological process;GO:0044763//single-organism cellular process;GO:0030030//cell projection organization;GO:0051179//localization;GO:0071704//organic substance metabolic process;GO:0007165//signal transduction;GO:0008152//metabolic process;GO:0050896/…
XR_003498498.1	--	TCONS_00040543	USP33	0.958119	0.000177928	NC_040052.1	13487833	13504177	+	NC_040053.1	16551579	16587631	-	--	XP_012959727.1 PREDICTED: ubiquitin carboxyl-terminal hydrolase 33 isoform X4 [Anas platyrhynchos]	-	-	-	-	GO:0044464//cell part;GO:0005622//intracellular;GO:0044430//cytoskeletal part;GO:0044422//organelle part;GO:0005856//cytoskeleton;GO:0015630//microtubule cytoskeleton;GO:0044446//intracellular organelle part;GO:0044424//intracellular part;GO:0005623//cell;GO:0043226//organelle;GO:0043229//intracellular organelle;GO:0005815//microtubule organizing center;GO:0043228//non-membrane-bounded organelle;…	GO:0005488//binding;GO:0016787//hydrolase activity;GO:0043167//ion binding;GO:0019783//ubiquitin-like protein-specific protease activity;GO:0036459//thiol-dependent ubiquitinyl hydrolase activity;GO:0046872//metal ion binding;GO:0043169//cation binding;GO:0101005//ubiquitinyl hydrolase activity;GO:0003824//catalytic activity;GO:0008234//cysteine-type peptidase activity;GO:0008233//peptidase activ…	GO:0007186//G-protein coupled receptor signaling pathway;GO:0040011//locomotion;GO:0009605//response to external stimulus;GO:0050789//regulation of biological process;GO:0044763//single-organism cellular process;GO:0030030//cell projection organization;GO:0051179//localization;GO:0071704//organic substance metabolic process;GO:0007165//signal transduction;GO:0008152//metabolic process;GO:0050896/…
TCONS_00027847	--	TCONS_00040963	GLUL	0.954843	0.000222474	NC_040049.1	70309937	70330318	-	NC_040053.1	25925352	25931028	-	--	XP_013054906.1 PREDICTED: glutamine synthetase [Anser cygnoides domesticus]	Cellular Processes;Metabolism;Organismal Systems	Nervous system;Amino acid metabolism;Energy metabolism;Cell growth and death;Carbohydrate metabolism;Global and overview maps	ko01100//Metabolic pathways;ko04724//Glutamatergic synapse;ko04217//Necroptosis;ko04727//GABAergic synapse;ko01230//Biosynthesis of amino acids;ko00250//Alanine, aspartate and glutamate metabolism;ko00630//Glyoxylate and dicarboxylate metabolism;ko00220//Arginine biosynthesis;ko00910//Nitrogen metabolism	K01915	GO:0044464//cell part;GO:0005622//intracellular;GO:0044424//intracellular part;GO:0043227//membrane-bounded organelle;GO:0031982//vesicle;GO:0031988//membrane-bounded vesicle;GO:0043231//intracellular membrane-bounded organelle;GO:0043229//intracellular organelle;GO:0043226//organelle;GO:0042995//cell projection;GO:0005623//cell	GO:0032549//ribonucleoside binding;GO:0001882//nucleoside binding;GO:0016879//ligase activity, forming carbon-nitrogen bonds;GO:0097159//organic cyclic compound binding;GO:0005488//binding;GO:1901363//heterocyclic compound binding;GO:0001883//purine nucleoside binding;GO:0003824//catalytic activity;GO:0036094//small molecule binding;GO:0097367//carbohydrate derivative binding;GO:0016211//ammonia …	GO:0044238//primary metabolic process;GO:0034284//response to monosaccharide;GO:0050896//response to stimulus;GO:0006541//glutamine metabolic process;GO:0019752//carboxylic acid metabolic process;GO:0009064//glutamine family amino acid metabolic process;GO:1901700//response to oxygen-containing compound;GO:0071704//organic substance metabolic process;GO:0044710//single-organism metabolic process;…
XR_002398923.2	--	TCONS_00040978	Rgs16	0.963404	0.000119188	NC_040064.1	849539	901316	-	NC_040053.1	25963104	25976646	-	--	XP_012962897.1 PREDICTED: regulator of G-protein signaling 16 isoform X1 [Anas platyrhynchos]	-	-	-	-	-	-	-
XR_003499788.1	--	TCONS_00040978	Rgs16	0.952744	0.000254556	NC_040046.1	1039275	1043184	-	NC_040053.1	25963104	25976646	-	--	XP_012962897.1 PREDICTED: regulator of G-protein signaling 16 isoform X1 [Anas platyrhynchos]	-	-	-	-	-	-	-
XR_217450.4	--	TCONS_00041183	F13B	0.953416	0.000243985	NC_040063.1	2714704	2717526	-	NC_040053.1	29509068	29521923	-	--	XP_009584153.1 PREDICTED: coagulation factor XIII B chain [Fulmarus glacialis]	Organismal Systems	Immune system	ko04610//Complement and coagulation cascades	K03906	-	-	-
TCONS_00024716	--	TCONS_00041433	EPHX4	-0.968623	7.54e-05	NC_040049.1	42469061	42482288	+	NC_040053.1	35923655	35936387	-	--	EOA96364.1 Abhydrolase domain-containing protein 7, partial [Anas platyrhynchos]	-	-	-	-	-	-	-
TCONS_00045460	--	TCONS_00041814	ABCC5	0.978369	2.49e-05	NC_040056.1	4309249	4452911	+	NC_040054.1	9341991	9390535	+	--	XP_005022493.1 PREDICTED: multidrug resistance-associated protein 5 isoform X6 [Anas platyrhynchos]	Human Diseases;Environmental Information Processing	Membrane transport;Drug resistance	ko02010//ABC transporters;ko01523//Antifolate resistance	K05668	GO:0044425//membrane part;GO:0031224//intrinsic component of membrane;GO:0016020//membrane	GO:0036094//small molecule binding;GO:0008509//anion transmembrane transporter activity;GO:0017111//nucleoside-triphosphatase activity;GO:0022804//active transmembrane transporter activity;GO:0022857//transmembrane transporter activity;GO:0097159//organic cyclic compound binding;GO:0016817//hydrolase activity, acting on acid anhydrides;GO:0001882//nucleoside binding;GO:1901363//heterocyclic compo…	GO:0044763//single-organism cellular process;GO:0044765//single-organism transport;GO:0051179//localization;GO:0051234//establishment of localization;GO:0006811//ion transport;GO:0009987//cellular process;GO:1902578//single-organism localization;GO:0006810//transport;GO:0044699//single-organism process;GO:0006820//anion transport
XR_003492935.1	--	TCONS_00041814	ABCC5	0.976309	3.27e-05	NC_040075.1	71153275	71158556	+	NC_040054.1	9341991	9390535	+	--	XP_005022493.1 PREDICTED: multidrug resistance-associated protein 5 isoform X6 [Anas platyrhynchos]	Human Diseases;Environmental Information Processing	Membrane transport;Drug resistance	ko02010//ABC transporters;ko01523//Antifolate resistance	K05668	GO:0044425//membrane part;GO:0031224//intrinsic component of membrane;GO:0016020//membrane	GO:0036094//small molecule binding;GO:0008509//anion transmembrane transporter activity;GO:0017111//nucleoside-triphosphatase activity;GO:0022804//active transmembrane transporter activity;GO:0022857//transmembrane transporter activity;GO:0097159//organic cyclic compound binding;GO:0016817//hydrolase activity, acting on acid anhydrides;GO:0001882//nucleoside binding;GO:1901363//heterocyclic compo…	GO:0044763//single-organism cellular process;GO:0044765//single-organism transport;GO:0051179//localization;GO:0051234//establishment of localization;GO:0006811//ion transport;GO:0009987//cellular process;GO:1902578//single-organism localization;GO:0006810//transport;GO:0044699//single-organism process;GO:0006820//anion transport
TCONS_00000285	--	TCONS_00042235	DGKD	0.956416	0.00020027	NC_040046.1	8404934	8425213	+	NC_040054.1	17085463	17119813	+	--	XP_012964159.1 PREDICTED: diacylglycerol kinase delta isoform X4 [Anas platyrhynchos]	Human Diseases;Metabolism;Environmental Information Processing	Signal transduction;Global and overview maps;Cancers;Lipid metabolism	ko01100//Metabolic pathways;ko04072//Phospholipase D signaling pathway;ko04070//Phosphatidylinositol signaling system;ko00564//Glycerophospholipid metabolism;ko05231//Choline metabolism in cancer;ko00561//Glycerolipid metabolism	K00901	GO:0043229//intracellular organelle;GO:0005623//cell;GO:0043231//intracellular membrane-bounded organelle;GO:0044464//cell part;GO:0016020//membrane;GO:0005622//intracellular;GO:0044424//intracellular part;GO:0043227//membrane-bounded organelle;GO:0043226//organelle	GO:0036094//small molecule binding;GO:0005515//protein binding;GO:1901363//heterocyclic compound binding;GO:0016740//transferase activity;GO:0032550//purine ribonucleoside binding;GO:0097159//organic cyclic compound binding;GO:0032549//ribonucleoside binding;GO:0001883//purine nucleoside binding;GO:0005488//binding;GO:0016301//kinase activity;GO:0003824//catalytic activity;GO:0001882//nucleoside …	GO:0006461//protein complex assembly;GO:0044699//single-organism process;GO:0006796//phosphate-containing compound metabolic process;GO:0044237//cellular metabolic process;GO:0006793//phosphorus metabolic process;GO:0071822//protein complex subunit organization;GO:0065003//macromolecular complex assembly;GO:0044763//single-organism cellular process;GO:0050896//response to stimulus;GO:0043933//mac…
TCONS_00045460	--	TCONS_00042235	DGKD	0.986741	5.77e-06	NC_040056.1	4309249	4452911	+	NC_040054.1	17085463	17119813	+	--	XP_012964159.1 PREDICTED: diacylglycerol kinase delta isoform X4 [Anas platyrhynchos]	Human Diseases;Metabolism;Environmental Information Processing	Signal transduction;Global and overview maps;Cancers;Lipid metabolism	ko01100//Metabolic pathways;ko04072//Phospholipase D signaling pathway;ko04070//Phosphatidylinositol signaling system;ko00564//Glycerophospholipid metabolism;ko05231//Choline metabolism in cancer;ko00561//Glycerolipid metabolism	K00901	GO:0043229//intracellular organelle;GO:0005623//cell;GO:0043231//intracellular membrane-bounded organelle;GO:0044464//cell part;GO:0016020//membrane;GO:0005622//intracellular;GO:0044424//intracellular part;GO:0043227//membrane-bounded organelle;GO:0043226//organelle	GO:0036094//small molecule binding;GO:0005515//protein binding;GO:1901363//heterocyclic compound binding;GO:0016740//transferase activity;GO:0032550//purine ribonucleoside binding;GO:0097159//organic cyclic compound binding;GO:0032549//ribonucleoside binding;GO:0001883//purine nucleoside binding;GO:0005488//binding;GO:0016301//kinase activity;GO:0003824//catalytic activity;GO:0001882//nucleoside …	GO:0006461//protein complex assembly;GO:0044699//single-organism process;GO:0006796//phosphate-containing compound metabolic process;GO:0044237//cellular metabolic process;GO:0006793//phosphorus metabolic process;GO:0071822//protein complex subunit organization;GO:0065003//macromolecular complex assembly;GO:0044763//single-organism cellular process;GO:0050896//response to stimulus;GO:0043933//mac…
XR_003492935.1	--	TCONS_00042235	DGKD	0.966717	8.99e-05	NC_040075.1	71153275	71158556	+	NC_040054.1	17085463	17119813	+	--	XP_012964159.1 PREDICTED: diacylglycerol kinase delta isoform X4 [Anas platyrhynchos]	Human Diseases;Metabolism;Environmental Information Processing	Signal transduction;Global and overview maps;Cancers;Lipid metabolism	ko01100//Metabolic pathways;ko04072//Phospholipase D signaling pathway;ko04070//Phosphatidylinositol signaling system;ko00564//Glycerophospholipid metabolism;ko05231//Choline metabolism in cancer;ko00561//Glycerolipid metabolism	K00901	GO:0043229//intracellular organelle;GO:0005623//cell;GO:0043231//intracellular membrane-bounded organelle;GO:0044464//cell part;GO:0016020//membrane;GO:0005622//intracellular;GO:0044424//intracellular part;GO:0043227//membrane-bounded organelle;GO:0043226//organelle	GO:0036094//small molecule binding;GO:0005515//protein binding;GO:1901363//heterocyclic compound binding;GO:0016740//transferase activity;GO:0032550//purine ribonucleoside binding;GO:0097159//organic cyclic compound binding;GO:0032549//ribonucleoside binding;GO:0001883//purine nucleoside binding;GO:0005488//binding;GO:0016301//kinase activity;GO:0003824//catalytic activity;GO:0001882//nucleoside …	GO:0006461//protein complex assembly;GO:0044699//single-organism process;GO:0006796//phosphate-containing compound metabolic process;GO:0044237//cellular metabolic process;GO:0006793//phosphorus metabolic process;GO:0071822//protein complex subunit organization;GO:0065003//macromolecular complex assembly;GO:0044763//single-organism cellular process;GO:0050896//response to stimulus;GO:0043933//mac…
XR_003498107.1	--	TCONS_00042235	DGKD	0.970876	6.04e-05	NC_040051.1	448811	457264	-	NC_040054.1	17085463	17119813	+	--	XP_012964159.1 PREDICTED: diacylglycerol kinase delta isoform X4 [Anas platyrhynchos]	Human Diseases;Metabolism;Environmental Information Processing	Signal transduction;Global and overview maps;Cancers;Lipid metabolism	ko01100//Metabolic pathways;ko04072//Phospholipase D signaling pathway;ko04070//Phosphatidylinositol signaling system;ko00564//Glycerophospholipid metabolism;ko05231//Choline metabolism in cancer;ko00561//Glycerolipid metabolism	K00901	GO:0043229//intracellular organelle;GO:0005623//cell;GO:0043231//intracellular membrane-bounded organelle;GO:0044464//cell part;GO:0016020//membrane;GO:0005622//intracellular;GO:0044424//intracellular part;GO:0043227//membrane-bounded organelle;GO:0043226//organelle	GO:0036094//small molecule binding;GO:0005515//protein binding;GO:1901363//heterocyclic compound binding;GO:0016740//transferase activity;GO:0032550//purine ribonucleoside binding;GO:0097159//organic cyclic compound binding;GO:0032549//ribonucleoside binding;GO:0001883//purine nucleoside binding;GO:0005488//binding;GO:0016301//kinase activity;GO:0003824//catalytic activity;GO:0001882//nucleoside …	GO:0006461//protein complex assembly;GO:0044699//single-organism process;GO:0006796//phosphate-containing compound metabolic process;GO:0044237//cellular metabolic process;GO:0006793//phosphorus metabolic process;GO:0071822//protein complex subunit organization;GO:0065003//macromolecular complex assembly;GO:0044763//single-organism cellular process;GO:0050896//response to stimulus;GO:0043933//mac…
XR_217813.4	--	TCONS_00042235	DGKD	0.963696	0.000116391	NC_040065.1	2545158	2563849	+	NC_040054.1	17085463	17119813	+	--	XP_012964159.1 PREDICTED: diacylglycerol kinase delta isoform X4 [Anas platyrhynchos]	Human Diseases;Metabolism;Environmental Information Processing	Signal transduction;Global and overview maps;Cancers;Lipid metabolism	ko01100//Metabolic pathways;ko04072//Phospholipase D signaling pathway;ko04070//Phosphatidylinositol signaling system;ko00564//Glycerophospholipid metabolism;ko05231//Choline metabolism in cancer;ko00561//Glycerolipid metabolism	K00901	GO:0043229//intracellular organelle;GO:0005623//cell;GO:0043231//intracellular membrane-bounded organelle;GO:0044464//cell part;GO:0016020//membrane;GO:0005622//intracellular;GO:0044424//intracellular part;GO:0043227//membrane-bounded organelle;GO:0043226//organelle	GO:0036094//small molecule binding;GO:0005515//protein binding;GO:1901363//heterocyclic compound binding;GO:0016740//transferase activity;GO:0032550//purine ribonucleoside binding;GO:0097159//organic cyclic compound binding;GO:0032549//ribonucleoside binding;GO:0001883//purine nucleoside binding;GO:0005488//binding;GO:0016301//kinase activity;GO:0003824//catalytic activity;GO:0001882//nucleoside …	GO:0006461//protein complex assembly;GO:0044699//single-organism process;GO:0006796//phosphate-containing compound metabolic process;GO:0044237//cellular metabolic process;GO:0006793//phosphorus metabolic process;GO:0071822//protein complex subunit organization;GO:0065003//macromolecular complex assembly;GO:0044763//single-organism cellular process;GO:0050896//response to stimulus;GO:0043933//mac…
TCONS_00041892	--	TCONS_00042237	DGKD	0.963791	0.000115486	NC_040054.1	10486383	10510102	+	NC_040054.1	17085817	17119813	+	--	XP_012964159.1 PREDICTED: diacylglycerol kinase delta isoform X4 [Anas platyrhynchos]	Metabolism;Human Diseases;Environmental Information Processing	Lipid metabolism;Global and overview maps;Cancers;Signal transduction	ko01100//Metabolic pathways;ko04072//Phospholipase D signaling pathway;ko04070//Phosphatidylinositol signaling system;ko00564//Glycerophospholipid metabolism;ko05231//Choline metabolism in cancer;ko00561//Glycerolipid metabolism	K00901	GO:0043227//membrane-bounded organelle;GO:0043231//intracellular membrane-bounded organelle;GO:0044464//cell part;GO:0043226//organelle;GO:0005622//intracellular;GO:0016020//membrane;GO:0043229//intracellular organelle;GO:0005623//cell;GO:0044424//intracellular part	GO:0097159//organic cyclic compound binding;GO:0097367//carbohydrate derivative binding;GO:0001882//nucleoside binding;GO:0032549//ribonucleoside binding;GO:0005515//protein binding;GO:0016740//transferase activity;GO:0016772//transferase activity, transferring phosphorus-containing groups;GO:0001883//purine nucleoside binding;GO:0036094//small molecule binding;GO:0003824//catalytic activity;GO:0…	GO:0009987//cellular process;GO:0044699//single-organism process;GO:0065003//macromolecular complex assembly;GO:0042221//response to chemical;GO:0044085//cellular component biogenesis;GO:0044700//single organism signaling;GO:0051259//protein oligomerization;GO:0050794//regulation of cellular process;GO:0007165//signal transduction;GO:0043933//macromolecular complex subunit organization;GO:0006793…
TCONS_00045460	--	TCONS_00042237	DGKD	0.967986	8.01e-05	NC_040056.1	4309249	4452911	+	NC_040054.1	17085817	17119813	+	--	XP_012964159.1 PREDICTED: diacylglycerol kinase delta isoform X4 [Anas platyrhynchos]	Metabolism;Human Diseases;Environmental Information Processing	Lipid metabolism;Global and overview maps;Cancers;Signal transduction	ko01100//Metabolic pathways;ko04072//Phospholipase D signaling pathway;ko04070//Phosphatidylinositol signaling system;ko00564//Glycerophospholipid metabolism;ko05231//Choline metabolism in cancer;ko00561//Glycerolipid metabolism	K00901	GO:0043227//membrane-bounded organelle;GO:0043231//intracellular membrane-bounded organelle;GO:0044464//cell part;GO:0043226//organelle;GO:0005622//intracellular;GO:0016020//membrane;GO:0043229//intracellular organelle;GO:0005623//cell;GO:0044424//intracellular part	GO:0097159//organic cyclic compound binding;GO:0097367//carbohydrate derivative binding;GO:0001882//nucleoside binding;GO:0032549//ribonucleoside binding;GO:0005515//protein binding;GO:0016740//transferase activity;GO:0016772//transferase activity, transferring phosphorus-containing groups;GO:0001883//purine nucleoside binding;GO:0036094//small molecule binding;GO:0003824//catalytic activity;GO:0…	GO:0009987//cellular process;GO:0044699//single-organism process;GO:0065003//macromolecular complex assembly;GO:0042221//response to chemical;GO:0044085//cellular component biogenesis;GO:0044700//single organism signaling;GO:0051259//protein oligomerization;GO:0050794//regulation of cellular process;GO:0007165//signal transduction;GO:0043933//macromolecular complex subunit organization;GO:0006793…
TCONS_00066773	--	TCONS_00042237	DGKD	0.950824	0.000286447	NC_040075.1	21782117	21795286	+	NC_040054.1	17085817	17119813	+	--	XP_012964159.1 PREDICTED: diacylglycerol kinase delta isoform X4 [Anas platyrhynchos]	Metabolism;Human Diseases;Environmental Information Processing	Lipid metabolism;Global and overview maps;Cancers;Signal transduction	ko01100//Metabolic pathways;ko04072//Phospholipase D signaling pathway;ko04070//Phosphatidylinositol signaling system;ko00564//Glycerophospholipid metabolism;ko05231//Choline metabolism in cancer;ko00561//Glycerolipid metabolism	K00901	GO:0043227//membrane-bounded organelle;GO:0043231//intracellular membrane-bounded organelle;GO:0044464//cell part;GO:0043226//organelle;GO:0005622//intracellular;GO:0016020//membrane;GO:0043229//intracellular organelle;GO:0005623//cell;GO:0044424//intracellular part	GO:0097159//organic cyclic compound binding;GO:0097367//carbohydrate derivative binding;GO:0001882//nucleoside binding;GO:0032549//ribonucleoside binding;GO:0005515//protein binding;GO:0016740//transferase activity;GO:0016772//transferase activity, transferring phosphorus-containing groups;GO:0001883//purine nucleoside binding;GO:0036094//small molecule binding;GO:0003824//catalytic activity;GO:0…	GO:0009987//cellular process;GO:0044699//single-organism process;GO:0065003//macromolecular complex assembly;GO:0042221//response to chemical;GO:0044085//cellular component biogenesis;GO:0044700//single organism signaling;GO:0051259//protein oligomerization;GO:0050794//regulation of cellular process;GO:0007165//signal transduction;GO:0043933//macromolecular complex subunit organization;GO:0006793…
XR_002401731.2	--	TCONS_00042237	DGKD	0.981412	1.58e-05	NC_040053.1	35192537	35197417	+	NC_040054.1	17085817	17119813	+	--	XP_012964159.1 PREDICTED: diacylglycerol kinase delta isoform X4 [Anas platyrhynchos]	Metabolism;Human Diseases;Environmental Information Processing	Lipid metabolism;Global and overview maps;Cancers;Signal transduction	ko01100//Metabolic pathways;ko04072//Phospholipase D signaling pathway;ko04070//Phosphatidylinositol signaling system;ko00564//Glycerophospholipid metabolism;ko05231//Choline metabolism in cancer;ko00561//Glycerolipid metabolism	K00901	GO:0043227//membrane-bounded organelle;GO:0043231//intracellular membrane-bounded organelle;GO:0044464//cell part;GO:0043226//organelle;GO:0005622//intracellular;GO:0016020//membrane;GO:0043229//intracellular organelle;GO:0005623//cell;GO:0044424//intracellular part	GO:0097159//organic cyclic compound binding;GO:0097367//carbohydrate derivative binding;GO:0001882//nucleoside binding;GO:0032549//ribonucleoside binding;GO:0005515//protein binding;GO:0016740//transferase activity;GO:0016772//transferase activity, transferring phosphorus-containing groups;GO:0001883//purine nucleoside binding;GO:0036094//small molecule binding;GO:0003824//catalytic activity;GO:0…	GO:0009987//cellular process;GO:0044699//single-organism process;GO:0065003//macromolecular complex assembly;GO:0042221//response to chemical;GO:0044085//cellular component biogenesis;GO:0044700//single organism signaling;GO:0051259//protein oligomerization;GO:0050794//regulation of cellular process;GO:0007165//signal transduction;GO:0043933//macromolecular complex subunit organization;GO:0006793…
XR_003497753.1	--	TCONS_00042237	DGKD	0.9511	0.000281715	NC_040050.1	5582146	5595688	-	NC_040054.1	17085817	17119813	+	--	XP_012964159.1 PREDICTED: diacylglycerol kinase delta isoform X4 [Anas platyrhynchos]	Metabolism;Human Diseases;Environmental Information Processing	Lipid metabolism;Global and overview maps;Cancers;Signal transduction	ko01100//Metabolic pathways;ko04072//Phospholipase D signaling pathway;ko04070//Phosphatidylinositol signaling system;ko00564//Glycerophospholipid metabolism;ko05231//Choline metabolism in cancer;ko00561//Glycerolipid metabolism	K00901	GO:0043227//membrane-bounded organelle;GO:0043231//intracellular membrane-bounded organelle;GO:0044464//cell part;GO:0043226//organelle;GO:0005622//intracellular;GO:0016020//membrane;GO:0043229//intracellular organelle;GO:0005623//cell;GO:0044424//intracellular part	GO:0097159//organic cyclic compound binding;GO:0097367//carbohydrate derivative binding;GO:0001882//nucleoside binding;GO:0032549//ribonucleoside binding;GO:0005515//protein binding;GO:0016740//transferase activity;GO:0016772//transferase activity, transferring phosphorus-containing groups;GO:0001883//purine nucleoside binding;GO:0036094//small molecule binding;GO:0003824//catalytic activity;GO:0…	GO:0009987//cellular process;GO:0044699//single-organism process;GO:0065003//macromolecular complex assembly;GO:0042221//response to chemical;GO:0044085//cellular component biogenesis;GO:0044700//single organism signaling;GO:0051259//protein oligomerization;GO:0050794//regulation of cellular process;GO:0007165//signal transduction;GO:0043933//macromolecular complex subunit organization;GO:0006793…
XR_003497934.1	--	TCONS_00042237	DGKD	0.96287	0.000124439	NC_040051.1	26348029	26575846	+	NC_040054.1	17085817	17119813	+	--	XP_012964159.1 PREDICTED: diacylglycerol kinase delta isoform X4 [Anas platyrhynchos]	Metabolism;Human Diseases;Environmental Information Processing	Lipid metabolism;Global and overview maps;Cancers;Signal transduction	ko01100//Metabolic pathways;ko04072//Phospholipase D signaling pathway;ko04070//Phosphatidylinositol signaling system;ko00564//Glycerophospholipid metabolism;ko05231//Choline metabolism in cancer;ko00561//Glycerolipid metabolism	K00901	GO:0043227//membrane-bounded organelle;GO:0043231//intracellular membrane-bounded organelle;GO:0044464//cell part;GO:0043226//organelle;GO:0005622//intracellular;GO:0016020//membrane;GO:0043229//intracellular organelle;GO:0005623//cell;GO:0044424//intracellular part	GO:0097159//organic cyclic compound binding;GO:0097367//carbohydrate derivative binding;GO:0001882//nucleoside binding;GO:0032549//ribonucleoside binding;GO:0005515//protein binding;GO:0016740//transferase activity;GO:0016772//transferase activity, transferring phosphorus-containing groups;GO:0001883//purine nucleoside binding;GO:0036094//small molecule binding;GO:0003824//catalytic activity;GO:0…	GO:0009987//cellular process;GO:0044699//single-organism process;GO:0065003//macromolecular complex assembly;GO:0042221//response to chemical;GO:0044085//cellular component biogenesis;GO:0044700//single organism signaling;GO:0051259//protein oligomerization;GO:0050794//regulation of cellular process;GO:0007165//signal transduction;GO:0043933//macromolecular complex subunit organization;GO:0006793…
XR_003501057.1	--	TCONS_00042237	DGKD	0.958066	0.000178596	NC_040063.1	8275910	8287160	-	NC_040054.1	17085817	17119813	+	--	XP_012964159.1 PREDICTED: diacylglycerol kinase delta isoform X4 [Anas platyrhynchos]	Metabolism;Human Diseases;Environmental Information Processing	Lipid metabolism;Global and overview maps;Cancers;Signal transduction	ko01100//Metabolic pathways;ko04072//Phospholipase D signaling pathway;ko04070//Phosphatidylinositol signaling system;ko00564//Glycerophospholipid metabolism;ko05231//Choline metabolism in cancer;ko00561//Glycerolipid metabolism	K00901	GO:0043227//membrane-bounded organelle;GO:0043231//intracellular membrane-bounded organelle;GO:0044464//cell part;GO:0043226//organelle;GO:0005622//intracellular;GO:0016020//membrane;GO:0043229//intracellular organelle;GO:0005623//cell;GO:0044424//intracellular part	GO:0097159//organic cyclic compound binding;GO:0097367//carbohydrate derivative binding;GO:0001882//nucleoside binding;GO:0032549//ribonucleoside binding;GO:0005515//protein binding;GO:0016740//transferase activity;GO:0016772//transferase activity, transferring phosphorus-containing groups;GO:0001883//purine nucleoside binding;GO:0036094//small molecule binding;GO:0003824//catalytic activity;GO:0…	GO:0009987//cellular process;GO:0044699//single-organism process;GO:0065003//macromolecular complex assembly;GO:0042221//response to chemical;GO:0044085//cellular component biogenesis;GO:0044700//single organism signaling;GO:0051259//protein oligomerization;GO:0050794//regulation of cellular process;GO:0007165//signal transduction;GO:0043933//macromolecular complex subunit organization;GO:0006793…
TCONS_00016179	--	TCONS_00042645	-	0.955741	0.00020961	NC_040047.1	110241725	110303752	-	NC_040054.1	1899237	1906206	-	--	XP_005027636.1 PREDICTED: retinoic acid receptor responder protein 1 [Anas platyrhynchos]	-	-	-	-	-	-	-
TCONS_00024716	--	TCONS_00042645	-	0.971476	5.68e-05	NC_040049.1	42469061	42482288	+	NC_040054.1	1899237	1906206	-	--	XP_005027636.1 PREDICTED: retinoic acid receptor responder protein 1 [Anas platyrhynchos]	-	-	-	-	-	-	-
TCONS_00038080	--	TCONS_00042765	TNIK	0.964894	0.000105338	NC_040052.1	28830732	28842721	-	NC_040054.1	4993163	5135649	-	--	XP_015147205.1 PREDICTED: TRAF2 and NCK-interacting protein kinase isoform X5 [Gallus gallus]	Environmental Information Processing	Signal transduction	ko04013//MAPK signaling pathway - fly	K08840	-	-	-
XR_002404480.2	--	TCONS_00042765	TNIK	0.977353	2.85e-05	NC_040048.1	46452115	46470181	-	NC_040054.1	4993163	5135649	-	--	XP_015147205.1 PREDICTED: TRAF2 and NCK-interacting protein kinase isoform X5 [Gallus gallus]	Environmental Information Processing	Signal transduction	ko04013//MAPK signaling pathway - fly	K08840	-	-	-
XR_003500147.1	--	TCONS_00042765	TNIK	0.984952	8.42e-06	NC_040057.1	2752569	2756305	-	NC_040054.1	4993163	5135649	-	--	XP_015147205.1 PREDICTED: TRAF2 and NCK-interacting protein kinase isoform X5 [Gallus gallus]	Environmental Information Processing	Signal transduction	ko04013//MAPK signaling pathway - fly	K08840	-	-	-
XR_003494352.1	--	TCONS_00043942	IL1RAPL2	0.956184	0.000203448	NW_020866753.1	8974	9856	+	NC_040055.1	7300691	7628552	+	--	XP_013039130.1 PREDICTED: X-linked interleukin-1 receptor accessory protein-like 2 isoform X4 [Anser cygnoides domesticus]	-	-	-	-	-	-	-
TCONS_00014904	--	TCONS_00044162	AGTR2	0.974165	4.23e-05	NC_040047.1	49147767	49281700	-	NC_040055.1	12414631	12427675	+	--	EOA93102.1 Type-2 angiotensin II receptor, partial [Anas platyrhynchos]	Organismal Systems;Environmental Information Processing	Endocrine system;Circulatory system;Signaling molecules and interaction	ko04080//Neuroactive ligand-receptor interaction;ko04261//Adrenergic signaling in cardiomyocytes;ko04614//Renin-angiotensin system	K04167	GO:0031224//intrinsic component of membrane;GO:0044425//membrane part;GO:0016020//membrane	GO:0038023//signaling receptor activity;GO:0008528//G-protein coupled peptide receptor activity;GO:0004872//receptor activity;GO:0060089//molecular transducer activity;GO:0001653//peptide receptor activity;GO:0001595//angiotensin receptor activity;GO:0004888//transmembrane signaling receptor activity;GO:0099600//transmembrane receptor activity;GO:0004930//G-protein coupled receptor activity;GO:00…	GO:0097191//extrinsic apoptotic signaling pathway;GO:0044700//single organism signaling;GO:0035304//regulation of protein dephosphorylation;GO:0043085//positive regulation of catalytic activity;GO:2000026//regulation of multicellular organismal development;GO:0065009//regulation of molecular function;GO:0044763//single-organism cellular process;GO:0090183//regulation of kidney development;GO:0048…
XR_003500049.1	--	TCONS_00044162	AGTR2	0.96054	0.0001491	NC_040057.1	4222351	4229255	+	NC_040055.1	12414631	12427675	+	--	EOA93102.1 Type-2 angiotensin II receptor, partial [Anas platyrhynchos]	Organismal Systems;Environmental Information Processing	Endocrine system;Circulatory system;Signaling molecules and interaction	ko04080//Neuroactive ligand-receptor interaction;ko04261//Adrenergic signaling in cardiomyocytes;ko04614//Renin-angiotensin system	K04167	GO:0031224//intrinsic component of membrane;GO:0044425//membrane part;GO:0016020//membrane	GO:0038023//signaling receptor activity;GO:0008528//G-protein coupled peptide receptor activity;GO:0004872//receptor activity;GO:0060089//molecular transducer activity;GO:0001653//peptide receptor activity;GO:0001595//angiotensin receptor activity;GO:0004888//transmembrane signaling receptor activity;GO:0099600//transmembrane receptor activity;GO:0004930//G-protein coupled receptor activity;GO:00…	GO:0097191//extrinsic apoptotic signaling pathway;GO:0044700//single organism signaling;GO:0035304//regulation of protein dephosphorylation;GO:0043085//positive regulation of catalytic activity;GO:2000026//regulation of multicellular organismal development;GO:0065009//regulation of molecular function;GO:0044763//single-organism cellular process;GO:0090183//regulation of kidney development;GO:0048…
XR_003492980.1	--	TCONS_00044820	Mtmr1	0.971943	5.41e-05	NC_040075.1	62684054	62685343	-	NC_040055.1	8154951	8188331	-	--	EOB00671.1 Myotubularin-related protein 1, partial [Anas platyrhynchos]	Environmental Information Processing;Metabolism	Signal transduction;Carbohydrate metabolism;Global and overview maps	ko01100//Metabolic pathways;ko04070//Phosphatidylinositol signaling system;ko00562//Inositol phosphate metabolism	K18081	GO:0005623//cell;GO:0044424//intracellular part;GO:0016020//membrane;GO:0005622//intracellular;GO:0044464//cell part	GO:0016787//hydrolase activity;GO:0004721//phosphoprotein phosphatase activity;GO:0052744//phosphatidylinositol monophosphate phosphatase activity;GO:0016791//phosphatase activity;GO:0003824//catalytic activity;GO:0042578//phosphoric ester hydrolase activity;GO:0016788//hydrolase activity, acting on ester bonds;GO:0052866//phosphatidylinositol phosphate phosphatase activity	GO:0044237//cellular metabolic process;GO:0044699//single-organism process;GO:0006644//phospholipid metabolic process;GO:0044255//cellular lipid metabolic process;GO:0006793//phosphorus metabolic process;GO:0071704//organic substance metabolic process;GO:0016311//dephosphorylation;GO:0046486//glycerolipid metabolic process;GO:0043412//macromolecule modification;GO:0044710//single-organism metabol…
TCONS_00066315	--	TCONS_00045684	ARIH1	0.960196	0.000152988	NC_040074.1	3707474	3720978	-	NC_040056.1	11702822	11747029	+	--	XP_010715421.2 PREDICTED: E3 ubiquitin-protein ligase ARIH1 isoform X1 [Meleagris gallopavo]	-	-	-	-	GO:0044424//intracellular part;GO:0005623//cell;GO:0044464//cell part;GO:0005622//intracellular;GO:0005737//cytoplasm;GO:0044444//cytoplasmic part	GO:0019899//enzyme binding;GO:0043167//ion binding;GO:0005515//protein binding;GO:0019787//ubiquitin-like protein transferase activity;GO:0016740//transferase activity;GO:0046872//metal ion binding;GO:0046914//transition metal ion binding;GO:0005488//binding;GO:0044389//ubiquitin-like protein ligase binding;GO:0043169//cation binding;GO:0003824//catalytic activity	GO:0051603//proteolysis involved in cellular protein catabolic process;GO:0044699//single-organism process;GO:0023052//signaling;GO:0009987//cellular process;GO:0051716//cellular response to stimulus;GO:0044248//cellular catabolic process;GO:0030163//protein catabolic process;GO:0050794//regulation of cellular process;GO:0044700//single organism signaling;GO:0065007//biological regulation;GO:0019…
XR_003497027.1	--	TCONS_00045760	SNX33	0.993015	8.47e-07	NC_040046.1	170286141	170324380	-	NC_040056.1	12817895	12822414	+	--	XP_009277117.1 PREDICTED: sorting nexin-33 [Aptenodytes forsteri]	-	-	-	-	GO:0044444//cytoplasmic part;GO:0031982//vesicle;GO:0016020//membrane;GO:0031090//organelle membrane;GO:0043229//intracellular organelle;GO:0043226//organelle;GO:0044464//cell part;GO:0031988//membrane-bounded vesicle;GO:0043231//intracellular membrane-bounded organelle;GO:0005622//intracellular;GO:0005623//cell;GO:0044425//membrane part;GO:0005737//cytoplasm;GO:0044422//organelle part;GO:0044424…	GO:0005515//protein binding;GO:0043167//ion binding;GO:0008289//lipid binding;GO:0043168//anion binding;GO:0005488//binding;GO:0005543//phospholipid binding	GO:0065007//biological regulation;GO:0022402//cell cycle process;GO:0030100//regulation of endocytosis;GO:0032879//regulation of localization;GO:0048522//positive regulation of cellular process;GO:0006996//organelle organization;GO:0016043//cellular component organization;GO:0061024//membrane organization;GO:0051649//establishment of localization in cell;GO:0044765//single-organism transport;GO:0…
TCONS_00066773	--	TCONS_00045990	-	0.95505	0.000219468	NC_040075.1	21782117	21795286	+	NC_040056.1	17335816	17336839	+	--	-	Organismal Systems	Aging;Digestive system	ko04978//Mineral absorption;ko04212//Longevity regulating pathway - worm	K14739	-	-	-
XR_001188103.2	--	TCONS_00045990	-	0.954581	0.000226326	NC_040051.1	25689118	25695910	+	NC_040056.1	17335816	17336839	+	--	-	Organismal Systems	Aging;Digestive system	ko04978//Mineral absorption;ko04212//Longevity regulating pathway - worm	K14739	-	-	-
XR_002401731.2	--	TCONS_00045990	-	0.961515	0.000138416	NC_040053.1	35192537	35197417	+	NC_040056.1	17335816	17336839	+	--	-	Organismal Systems	Aging;Digestive system	ko04978//Mineral absorption;ko04212//Longevity regulating pathway - worm	K14739	-	-	-
XR_003497753.1	--	TCONS_00045990	-	0.990238	2.31e-06	NC_040050.1	5582146	5595688	-	NC_040056.1	17335816	17336839	+	--	-	Organismal Systems	Aging;Digestive system	ko04978//Mineral absorption;ko04212//Longevity regulating pathway - worm	K14739	-	-	-
XR_003497934.1	--	TCONS_00045990	-	0.993953	5.5e-07	NC_040051.1	26348029	26575846	+	NC_040056.1	17335816	17336839	+	--	-	Organismal Systems	Aging;Digestive system	ko04978//Mineral absorption;ko04212//Longevity regulating pathway - worm	K14739	-	-	-
XR_003497816.1	--	TCONS_00046102	Kiaa0895l	0.982429	1.34e-05	NC_040050.1	30895238	30900671	-	NC_040056.1	18514076	18521402	+	--	EOB05244.1 Uncharacterized protein KIAA0895-like, partial [Anas platyrhynchos]	-	-	-	-	-	-	-
XR_003500093.1	--	TCONS_00046102	Kiaa0895l	-0.981562	1.55e-05	NC_040057.1	12378042	12386253	-	NC_040056.1	18514076	18521402	+	--	EOB05244.1 Uncharacterized protein KIAA0895-like, partial [Anas platyrhynchos]	-	-	-	-	-	-	-
TCONS_00041891	--	TCONS_00046317	IQGAP1	0.990849	1.9e-06	NC_040054.1	10486383	10510102	+	NC_040056.1	6	53737	-	--	EOA93825.1 Ras GTPase-activating-like protein IQGAP1, partial [Anas platyrhynchos]	Human Diseases;Cellular Processes	Cellular community - eukaryotes;Cancers;Cell motility	ko05205//Proteoglycans in cancer;ko04810//Regulation of actin cytoskeleton;ko04520//Adherens junction	K16848	GO:0043229//intracellular organelle;GO:0005623//cell;GO:0043228//non-membrane-bounded organelle;GO:1990904//ribonucleoprotein complex;GO:0032991//macromolecular complex;GO:0030054//cell junction;GO:0044425//membrane part;GO:0031988//membrane-bounded vesicle;GO:0043232//intracellular non-membrane-bounded organelle;GO:0005912//adherens junction;GO:0016020//membrane;GO:0035770//ribonucleoprotein gra…	GO:0019209//kinase activator activity;GO:0005515//protein binding;GO:0017016//Ras GTPase binding;GO:0019887//protein kinase regulator activity;GO:0043168//anion binding;GO:0019207//kinase regulator activity;GO:0017048//Rho GTPase binding;GO:0019899//enzyme binding;GO:1901981//phosphatidylinositol phosphate binding;GO:0035091//phosphatidylinositol binding;GO:0019900//kinase binding;GO:0031267//sma…	GO:0065009//regulation of molecular function;GO:0051246//regulation of protein metabolic process;GO:0019220//regulation of phosphate metabolic process;GO:0071310//cellular response to organic substance;GO:0007167//enzyme linked receptor protein signaling pathway;GO:0044699//single-organism process;GO:0032268//regulation of cellular protein metabolic process;GO:0031399//regulation of protein modif…
XR_003500147.1	--	TCONS_00046317	IQGAP1	0.993467	6.94e-07	NC_040057.1	2752569	2756305	-	NC_040056.1	6	53737	-	--	EOA93825.1 Ras GTPase-activating-like protein IQGAP1, partial [Anas platyrhynchos]	Human Diseases;Cellular Processes	Cellular community - eukaryotes;Cancers;Cell motility	ko05205//Proteoglycans in cancer;ko04810//Regulation of actin cytoskeleton;ko04520//Adherens junction	K16848	GO:0043229//intracellular organelle;GO:0005623//cell;GO:0043228//non-membrane-bounded organelle;GO:1990904//ribonucleoprotein complex;GO:0032991//macromolecular complex;GO:0030054//cell junction;GO:0044425//membrane part;GO:0031988//membrane-bounded vesicle;GO:0043232//intracellular non-membrane-bounded organelle;GO:0005912//adherens junction;GO:0016020//membrane;GO:0035770//ribonucleoprotein gra…	GO:0019209//kinase activator activity;GO:0005515//protein binding;GO:0017016//Ras GTPase binding;GO:0019887//protein kinase regulator activity;GO:0043168//anion binding;GO:0019207//kinase regulator activity;GO:0017048//Rho GTPase binding;GO:0019899//enzyme binding;GO:1901981//phosphatidylinositol phosphate binding;GO:0035091//phosphatidylinositol binding;GO:0019900//kinase binding;GO:0031267//sma…	GO:0065009//regulation of molecular function;GO:0051246//regulation of protein metabolic process;GO:0019220//regulation of phosphate metabolic process;GO:0071310//cellular response to organic substance;GO:0007167//enzyme linked receptor protein signaling pathway;GO:0044699//single-organism process;GO:0032268//regulation of cellular protein metabolic process;GO:0031399//regulation of protein modif…
XR_002400257.2	--	TCONS_00046661	KLHL25	0.973369	4.63e-05	NC_040061.1	9212256	9234245	-	NC_040056.1	7094356	7101910	-	--	XP_012952608.1 PREDICTED: kelch-like protein 25 isoform X2 [Anas platyrhynchos]	-	-	-	-	GO:0005622//intracellular;GO:0005623//cell;GO:1990234//transferase complex;GO:0031461//cullin-RING ubiquitin ligase complex;GO:1902494//catalytic complex;GO:0043234//protein complex;GO:0032991//macromolecular complex;GO:0044424//intracellular part;GO:0044464//cell part;GO:0000151//ubiquitin ligase complex	-	GO:0006464//cellular protein modification process;GO:0010556//regulation of macromolecule biosynthetic process;GO:0008152//metabolic process;GO:0031326//regulation of cellular biosynthetic process;GO:0031323//regulation of cellular metabolic process;GO:0044267//cellular protein metabolic process;GO:0010468//regulation of gene expression;GO:0060255//regulation of macromolecule metabolic process;GO…
XR_003499737.1	--	TCONS_00046661	KLHL25	0.952582	0.000257153	NC_040046.1	596694	623009	+	NC_040056.1	7094356	7101910	-	--	XP_012952608.1 PREDICTED: kelch-like protein 25 isoform X2 [Anas platyrhynchos]	-	-	-	-	GO:0005622//intracellular;GO:0005623//cell;GO:1990234//transferase complex;GO:0031461//cullin-RING ubiquitin ligase complex;GO:1902494//catalytic complex;GO:0043234//protein complex;GO:0032991//macromolecular complex;GO:0044424//intracellular part;GO:0044464//cell part;GO:0000151//ubiquitin ligase complex	-	GO:0006464//cellular protein modification process;GO:0010556//regulation of macromolecule biosynthetic process;GO:0008152//metabolic process;GO:0031326//regulation of cellular biosynthetic process;GO:0031323//regulation of cellular metabolic process;GO:0044267//cellular protein metabolic process;GO:0010468//regulation of gene expression;GO:0060255//regulation of macromolecule metabolic process;GO…
XR_003494352.1	--	TCONS_00046703	MESDC2	0.954769	0.000223567	NW_020866753.1	8974	9856	+	NC_040056.1	8971069	8981496	-	--	XP_009942105.1 PREDICTED: LDLR chaperone MESD [Opisthocomus hoazin]	-	-	-	-	-	GO:0005488//binding;GO:0070325//lipoprotein particle receptor binding;GO:0005515//protein binding;GO:0005102//receptor binding	GO:0034613//cellular protein localization;GO:0051641//cellular localization;GO:0044237//cellular metabolic process;GO:0071704//organic substance metabolic process;GO:0009987//cellular process;GO:0008152//metabolic process;GO:0008104//protein localization;GO:0033036//macromolecule localization;GO:0044238//primary metabolic process;GO:0019538//protein metabolic process;GO:0070727//cellular macromol…
XR_003496037.1	--	TCONS_00046703	MESDC2	0.975606	3.56e-05	NC_040048.1	11888155	11965730	-	NC_040056.1	8971069	8981496	-	--	XP_009942105.1 PREDICTED: LDLR chaperone MESD [Opisthocomus hoazin]	-	-	-	-	-	GO:0005488//binding;GO:0070325//lipoprotein particle receptor binding;GO:0005515//protein binding;GO:0005102//receptor binding	GO:0034613//cellular protein localization;GO:0051641//cellular localization;GO:0044237//cellular metabolic process;GO:0071704//organic substance metabolic process;GO:0009987//cellular process;GO:0008152//metabolic process;GO:0008104//protein localization;GO:0033036//macromolecule localization;GO:0044238//primary metabolic process;GO:0019538//protein metabolic process;GO:0070727//cellular macromol…
XR_003499478.1	--	TCONS_00046703	MESDC2	0.9896	2.79e-06	NC_040055.1	15146170	15401948	-	NC_040056.1	8971069	8981496	-	--	XP_009942105.1 PREDICTED: LDLR chaperone MESD [Opisthocomus hoazin]	-	-	-	-	-	GO:0005488//binding;GO:0070325//lipoprotein particle receptor binding;GO:0005515//protein binding;GO:0005102//receptor binding	GO:0034613//cellular protein localization;GO:0051641//cellular localization;GO:0044237//cellular metabolic process;GO:0071704//organic substance metabolic process;GO:0009987//cellular process;GO:0008152//metabolic process;GO:0008104//protein localization;GO:0033036//macromolecule localization;GO:0044238//primary metabolic process;GO:0019538//protein metabolic process;GO:0070727//cellular macromol…
XR_003497498.1	--	TCONS_00046824	Alpk3	0.981429	1.58e-05	NC_040050.1	40901292	40912200	-	NC_040056.1	10847806	10870327	-	--	XP_012952695.1 PREDICTED: alpha-protein kinase 3 isoform X3 [Anas platyrhynchos]	-	-	-	-	GO:0043226//organelle;GO:0005623//cell;GO:0043229//intracellular organelle;GO:0005622//intracellular;GO:0043231//intracellular membrane-bounded organelle;GO:0043227//membrane-bounded organelle;GO:0044424//intracellular part;GO:0044464//cell part	GO:0016740//transferase activity;GO:0032550//purine ribonucleoside binding;GO:0032549//ribonucleoside binding;GO:1901363//heterocyclic compound binding;GO:0001883//purine nucleoside binding;GO:0097159//organic cyclic compound binding;GO:0001882//nucleoside binding;GO:0097367//carbohydrate derivative binding;GO:0003824//catalytic activity;GO:0005488//binding;GO:0036094//small molecule binding	GO:0044238//primary metabolic process;GO:0044237//cellular metabolic process;GO:0009987//cellular process;GO:0008152//metabolic process;GO:0044267//cellular protein metabolic process;GO:0019538//protein metabolic process;GO:0036211//protein modification process;GO:0043412//macromolecule modification;GO:0043170//macromolecule metabolic process;GO:0044260//cellular macromolecule metabolic process;G…
XR_217450.4	--	TCONS_00046824	Alpk3	0.965155	0.000103022	NC_040063.1	2714704	2717526	-	NC_040056.1	10847806	10870327	-	--	XP_012952695.1 PREDICTED: alpha-protein kinase 3 isoform X3 [Anas platyrhynchos]	-	-	-	-	GO:0043226//organelle;GO:0005623//cell;GO:0043229//intracellular organelle;GO:0005622//intracellular;GO:0043231//intracellular membrane-bounded organelle;GO:0043227//membrane-bounded organelle;GO:0044424//intracellular part;GO:0044464//cell part	GO:0016740//transferase activity;GO:0032550//purine ribonucleoside binding;GO:0032549//ribonucleoside binding;GO:1901363//heterocyclic compound binding;GO:0001883//purine nucleoside binding;GO:0097159//organic cyclic compound binding;GO:0001882//nucleoside binding;GO:0097367//carbohydrate derivative binding;GO:0003824//catalytic activity;GO:0005488//binding;GO:0036094//small molecule binding	GO:0044238//primary metabolic process;GO:0044237//cellular metabolic process;GO:0009987//cellular process;GO:0008152//metabolic process;GO:0044267//cellular protein metabolic process;GO:0019538//protein metabolic process;GO:0036211//protein modification process;GO:0043412//macromolecule modification;GO:0043170//macromolecule metabolic process;GO:0044260//cellular macromolecule metabolic process;G…
XR_217450.4	--	TCONS_00046825	ALPK3	0.95884	0.000168992	NC_040063.1	2714704	2717526	-	NC_040056.1	10847806	10870327	-	--	XP_012952695.1 PREDICTED: alpha-protein kinase 3 isoform X3 [Anas platyrhynchos]	-	-	-	-	GO:0043227//membrane-bounded organelle;GO:0043226//organelle;GO:0043231//intracellular membrane-bounded organelle;GO:0005622//intracellular;GO:0043229//intracellular organelle;GO:0044424//intracellular part;GO:0044464//cell part;GO:0005623//cell	GO:0001883//purine nucleoside binding;GO:0003824//catalytic activity;GO:0032550//purine ribonucleoside binding;GO:0097367//carbohydrate derivative binding;GO:0016740//transferase activity;GO:0032549//ribonucleoside binding;GO:1901363//heterocyclic compound binding;GO:0097159//organic cyclic compound binding;GO:0001882//nucleoside binding;GO:0005488//binding;GO:0036094//small molecule binding	GO:0008152//metabolic process;GO:0044699//single-organism process;GO:0044767//single-organism developmental process;GO:0036211//protein modification process;GO:0044267//cellular protein metabolic process;GO:0032502//developmental process;GO:0009987//cellular process;GO:0044260//cellular macromolecule metabolic process;GO:0006464//cellular protein modification process;GO:0044237//cellular metaboli…
TCONS_00017468	--	TCONS_00046874	Myo9a	0.996419	1.15e-07	NC_040048.1	6291879	6362529	+	NC_040056.1	11427529	11585386	-	--	XP_012952678.1 PREDICTED: LOW QUALITY PROTEIN: unconventional myosin-IXa [Anas platyrhynchos]	-	-	-	-	GO:0043228//non-membrane-bounded organelle;GO:0005622//intracellular;GO:0005856//cytoskeleton;GO:0044464//cell part;GO:0043226//organelle;GO:0043229//intracellular organelle;GO:0005623//cell;GO:0015629//actin cytoskeleton;GO:0043232//intracellular non-membrane-bounded organelle;GO:0044424//intracellular part	GO:1901363//heterocyclic compound binding;GO:0016462//pyrophosphatase activity;GO:0016787//hydrolase activity;GO:0017111//nucleoside-triphosphatase activity;GO:0008047//enzyme activator activity;GO:0001883//purine nucleoside binding;GO:0043169//cation binding;GO:0003824//catalytic activity;GO:0030234//enzyme regulator activity;GO:0005488//binding;GO:0036094//small molecule binding;GO:0016818//hyd…	GO:0051336//regulation of hydrolase activity;GO:0050790//regulation of catalytic activity;GO:0065009//regulation of molecular function;GO:0050789//regulation of biological process;GO:0065007//biological regulation;GO:0019222//regulation of metabolic process;GO:0043087//regulation of GTPase activity
XR_003494014.1	--	TCONS_00046874	Myo9a	0.974189	4.22e-05	NW_020866079.1	9003	9887	+	NC_040056.1	11427529	11585386	-	--	XP_012952678.1 PREDICTED: LOW QUALITY PROTEIN: unconventional myosin-IXa [Anas platyrhynchos]	-	-	-	-	GO:0043228//non-membrane-bounded organelle;GO:0005622//intracellular;GO:0005856//cytoskeleton;GO:0044464//cell part;GO:0043226//organelle;GO:0043229//intracellular organelle;GO:0005623//cell;GO:0015629//actin cytoskeleton;GO:0043232//intracellular non-membrane-bounded organelle;GO:0044424//intracellular part	GO:1901363//heterocyclic compound binding;GO:0016462//pyrophosphatase activity;GO:0016787//hydrolase activity;GO:0017111//nucleoside-triphosphatase activity;GO:0008047//enzyme activator activity;GO:0001883//purine nucleoside binding;GO:0043169//cation binding;GO:0003824//catalytic activity;GO:0030234//enzyme regulator activity;GO:0005488//binding;GO:0036094//small molecule binding;GO:0016818//hyd…	GO:0051336//regulation of hydrolase activity;GO:0050790//regulation of catalytic activity;GO:0065009//regulation of molecular function;GO:0050789//regulation of biological process;GO:0065007//biological regulation;GO:0019222//regulation of metabolic process;GO:0043087//regulation of GTPase activity
TCONS_00041892	--	TCONS_00047162	HSDL1	0.976067	3.37e-05	NC_040054.1	10486383	10510102	+	NC_040056.1	16890492	16896480	-	--	XP_005025785.1 PREDICTED: inactive hydroxysteroid dehydrogenase-like protein 1 [Anas platyrhynchos]	-	-	-	-	GO:0044424//intracellular part;GO:0043227//membrane-bounded organelle;GO:0043226//organelle;GO:0005623//cell;GO:0005622//intracellular;GO:0043231//intracellular membrane-bounded organelle;GO:0043229//intracellular organelle;GO:0044464//cell part	GO:0003824//catalytic activity	GO:1901360//organic cyclic compound metabolic process;GO:0008202//steroid metabolic process;GO:0008152//metabolic process;GO:0044710//single-organism metabolic process;GO:0071704//organic substance metabolic process;GO:0044238//primary metabolic process;GO:0044699//single-organism process;GO:0006629//lipid metabolic process
TCONS_00045460	--	TCONS_00047162	HSDL1	0.953023	0.000250125	NC_040056.1	4309249	4452911	+	NC_040056.1	16890492	16896480	-	--	XP_005025785.1 PREDICTED: inactive hydroxysteroid dehydrogenase-like protein 1 [Anas platyrhynchos]	-	-	-	-	GO:0044424//intracellular part;GO:0043227//membrane-bounded organelle;GO:0043226//organelle;GO:0005623//cell;GO:0005622//intracellular;GO:0043231//intracellular membrane-bounded organelle;GO:0043229//intracellular organelle;GO:0044464//cell part	GO:0003824//catalytic activity	GO:1901360//organic cyclic compound metabolic process;GO:0008202//steroid metabolic process;GO:0008152//metabolic process;GO:0044710//single-organism metabolic process;GO:0071704//organic substance metabolic process;GO:0044238//primary metabolic process;GO:0044699//single-organism process;GO:0006629//lipid metabolic process
XR_002401731.2	--	TCONS_00047162	HSDL1	0.987046	5.38e-06	NC_040053.1	35192537	35197417	+	NC_040056.1	16890492	16896480	-	--	XP_005025785.1 PREDICTED: inactive hydroxysteroid dehydrogenase-like protein 1 [Anas platyrhynchos]	-	-	-	-	GO:0044424//intracellular part;GO:0043227//membrane-bounded organelle;GO:0043226//organelle;GO:0005623//cell;GO:0005622//intracellular;GO:0043231//intracellular membrane-bounded organelle;GO:0043229//intracellular organelle;GO:0044464//cell part	GO:0003824//catalytic activity	GO:1901360//organic cyclic compound metabolic process;GO:0008202//steroid metabolic process;GO:0008152//metabolic process;GO:0044710//single-organism metabolic process;GO:0071704//organic substance metabolic process;GO:0044238//primary metabolic process;GO:0044699//single-organism process;GO:0006629//lipid metabolic process
XR_003497753.1	--	TCONS_00047162	HSDL1	0.974543	4.05e-05	NC_040050.1	5582146	5595688	-	NC_040056.1	16890492	16896480	-	--	XP_005025785.1 PREDICTED: inactive hydroxysteroid dehydrogenase-like protein 1 [Anas platyrhynchos]	-	-	-	-	GO:0044424//intracellular part;GO:0043227//membrane-bounded organelle;GO:0043226//organelle;GO:0005623//cell;GO:0005622//intracellular;GO:0043231//intracellular membrane-bounded organelle;GO:0043229//intracellular organelle;GO:0044464//cell part	GO:0003824//catalytic activity	GO:1901360//organic cyclic compound metabolic process;GO:0008202//steroid metabolic process;GO:0008152//metabolic process;GO:0044710//single-organism metabolic process;GO:0071704//organic substance metabolic process;GO:0044238//primary metabolic process;GO:0044699//single-organism process;GO:0006629//lipid metabolic process
XR_003497934.1	--	TCONS_00047162	HSDL1	0.984196	9.75e-06	NC_040051.1	26348029	26575846	+	NC_040056.1	16890492	16896480	-	--	XP_005025785.1 PREDICTED: inactive hydroxysteroid dehydrogenase-like protein 1 [Anas platyrhynchos]	-	-	-	-	GO:0044424//intracellular part;GO:0043227//membrane-bounded organelle;GO:0043226//organelle;GO:0005623//cell;GO:0005622//intracellular;GO:0043231//intracellular membrane-bounded organelle;GO:0043229//intracellular organelle;GO:0044464//cell part	GO:0003824//catalytic activity	GO:1901360//organic cyclic compound metabolic process;GO:0008202//steroid metabolic process;GO:0008152//metabolic process;GO:0044710//single-organism metabolic process;GO:0071704//organic substance metabolic process;GO:0044238//primary metabolic process;GO:0044699//single-organism process;GO:0006629//lipid metabolic process
XR_003501057.1	--	TCONS_00047162	HSDL1	0.959874	0.000156699	NC_040063.1	8275910	8287160	-	NC_040056.1	16890492	16896480	-	--	XP_005025785.1 PREDICTED: inactive hydroxysteroid dehydrogenase-like protein 1 [Anas platyrhynchos]	-	-	-	-	GO:0044424//intracellular part;GO:0043227//membrane-bounded organelle;GO:0043226//organelle;GO:0005623//cell;GO:0005622//intracellular;GO:0043231//intracellular membrane-bounded organelle;GO:0043229//intracellular organelle;GO:0044464//cell part	GO:0003824//catalytic activity	GO:1901360//organic cyclic compound metabolic process;GO:0008202//steroid metabolic process;GO:0008152//metabolic process;GO:0044710//single-organism metabolic process;GO:0071704//organic substance metabolic process;GO:0044238//primary metabolic process;GO:0044699//single-organism process;GO:0006629//lipid metabolic process
XR_003495427.1	--	TCONS_00047201	ZNRF1	0.952087	0.000265197	NC_040047.1	68314617	68321553	+	NC_040056.1	17498432	17500777	-	--	XP_009568269.1 PREDICTED: E3 ubiquitin-protein ligase ZNRF1 [Cuculus canorus]	-	-	-	-	GO:0044444//cytoplasmic part;GO:0005737//cytoplasm;GO:0005622//intracellular;GO:0044424//intracellular part;GO:0005623//cell;GO:0044464//cell part	GO:0043167//ion binding;GO:0005488//binding;GO:0046914//transition metal ion binding;GO:0043169//cation binding;GO:0046872//metal ion binding	GO:0044260//cellular macromolecule metabolic process;GO:0006508//proteolysis;GO:0043632//modification-dependent macromolecule catabolic process;GO:0009987//cellular process;GO:0019941//modification-dependent protein catabolic process;GO:0043412//macromolecule modification;GO:0032446//protein modification by small protein conjugation;GO:0036211//protein modification process;GO:0071704//organic sub…
TCONS_00011835	--	TCONS_00047537	ALDH1A2	0.96412	0.000112396	NC_040047.1	57408380	57409820	+	NC_040057.1	982428	1038350	+	--	XP_005011993.1 PREDICTED: retinal dehydrogenase 2 [Anas platyrhynchos]	Metabolism	Global and overview maps;Metabolism of cofactors and vitamins	ko01100//Metabolic pathways;ko00830//Retinol metabolism	K07249	GO:0044464//cell part;GO:0044424//intracellular part;GO:0005622//intracellular;GO:0005623//cell	GO:0016903//oxidoreductase activity, acting on the aldehyde or oxo group of donors;GO:0003824//catalytic activity;GO:0016620//oxidoreductase activity, acting on the aldehyde or oxo group of donors, NAD or NADP as acceptor;GO:0016491//oxidoreductase activity	GO:0048598//embryonic morphogenesis;GO:0010941//regulation of cell death;GO:0007275//multicellular organism development;GO:0044710//single-organism metabolic process;GO:0060429//epithelium development;GO:0008152//metabolic process;GO:0035113//embryonic appendage morphogenesis;GO:0044283//small molecule biosynthetic process;GO:0003002//regionalization;GO:0042221//response to chemical;GO:0032526//r…
TCONS_00024446	--	TCONS_00047537	ALDH1A2	0.980699	1.77e-05	NC_040049.1	33410400	33480405	+	NC_040057.1	982428	1038350	+	--	XP_005011993.1 PREDICTED: retinal dehydrogenase 2 [Anas platyrhynchos]	Metabolism	Global and overview maps;Metabolism of cofactors and vitamins	ko01100//Metabolic pathways;ko00830//Retinol metabolism	K07249	GO:0044464//cell part;GO:0044424//intracellular part;GO:0005622//intracellular;GO:0005623//cell	GO:0016903//oxidoreductase activity, acting on the aldehyde or oxo group of donors;GO:0003824//catalytic activity;GO:0016620//oxidoreductase activity, acting on the aldehyde or oxo group of donors, NAD or NADP as acceptor;GO:0016491//oxidoreductase activity	GO:0048598//embryonic morphogenesis;GO:0010941//regulation of cell death;GO:0007275//multicellular organism development;GO:0044710//single-organism metabolic process;GO:0060429//epithelium development;GO:0008152//metabolic process;GO:0035113//embryonic appendage morphogenesis;GO:0044283//small molecule biosynthetic process;GO:0003002//regionalization;GO:0042221//response to chemical;GO:0032526//r…
XR_002402151.2	--	TCONS_00047537	ALDH1A2	0.96545	0.000100456	NC_040047.1	126841725	126848791	-	NC_040057.1	982428	1038350	+	--	XP_005011993.1 PREDICTED: retinal dehydrogenase 2 [Anas platyrhynchos]	Metabolism	Global and overview maps;Metabolism of cofactors and vitamins	ko01100//Metabolic pathways;ko00830//Retinol metabolism	K07249	GO:0044464//cell part;GO:0044424//intracellular part;GO:0005622//intracellular;GO:0005623//cell	GO:0016903//oxidoreductase activity, acting on the aldehyde or oxo group of donors;GO:0003824//catalytic activity;GO:0016620//oxidoreductase activity, acting on the aldehyde or oxo group of donors, NAD or NADP as acceptor;GO:0016491//oxidoreductase activity	GO:0048598//embryonic morphogenesis;GO:0010941//regulation of cell death;GO:0007275//multicellular organism development;GO:0044710//single-organism metabolic process;GO:0060429//epithelium development;GO:0008152//metabolic process;GO:0035113//embryonic appendage morphogenesis;GO:0044283//small molecule biosynthetic process;GO:0003002//regionalization;GO:0042221//response to chemical;GO:0032526//r…
XR_003498432.1	--	TCONS_00047537	ALDH1A2	0.958711	0.00017057	NC_040052.1	15282755	15317050	-	NC_040057.1	982428	1038350	+	--	XP_005011993.1 PREDICTED: retinal dehydrogenase 2 [Anas platyrhynchos]	Metabolism	Global and overview maps;Metabolism of cofactors and vitamins	ko01100//Metabolic pathways;ko00830//Retinol metabolism	K07249	GO:0044464//cell part;GO:0044424//intracellular part;GO:0005622//intracellular;GO:0005623//cell	GO:0016903//oxidoreductase activity, acting on the aldehyde or oxo group of donors;GO:0003824//catalytic activity;GO:0016620//oxidoreductase activity, acting on the aldehyde or oxo group of donors, NAD or NADP as acceptor;GO:0016491//oxidoreductase activity	GO:0048598//embryonic morphogenesis;GO:0010941//regulation of cell death;GO:0007275//multicellular organism development;GO:0044710//single-organism metabolic process;GO:0060429//epithelium development;GO:0008152//metabolic process;GO:0035113//embryonic appendage morphogenesis;GO:0044283//small molecule biosynthetic process;GO:0003002//regionalization;GO:0042221//response to chemical;GO:0032526//r…
XR_003493025.1	--	TCONS_00047602	Rab27a	0.956591	0.000197893	NC_040075.1	85099	88781	+	NC_040057.1	1941856	1977353	+	--	XP_005011968.1 PREDICTED: ras-related protein Rab-27A [Anas platyrhynchos]	-	-	-	-	-	-	-
TCONS_00033528	--	TCONS_00047641	MYO5A	0.983685	1.07e-05	NC_040051.1	25689118	25698460	+	NC_040057.1	2812047	2913128	+	--	XP_015728315.1 PREDICTED: unconventional myosin-Va isoform X4 [Coturnix japonica]	-	-	-	-	-	-	-
XR_001192252.3	--	TCONS_00047641	MYO5A	0.957853	0.000181305	NC_040046.1	27989435	28007208	+	NC_040057.1	2812047	2913128	+	--	XP_015728315.1 PREDICTED: unconventional myosin-Va isoform X4 [Coturnix japonica]	-	-	-	-	-	-	-
XR_001194425.3	--	TCONS_00047641	MYO5A	0.972077	5.33e-05	NC_040060.1	17207203	17319182	+	NC_040057.1	2812047	2913128	+	--	XP_015728315.1 PREDICTED: unconventional myosin-Va isoform X4 [Coturnix japonica]	-	-	-	-	-	-	-
XR_003497624.1	--	TCONS_00047641	MYO5A	0.962299	0.000130207	NC_040050.1	10827043	10838465	+	NC_040057.1	2812047	2913128	+	--	XP_015728315.1 PREDICTED: unconventional myosin-Va isoform X4 [Coturnix japonica]	-	-	-	-	-	-	-
TCONS_00033528	--	TCONS_00047643	MYO5A	0.985248	7.94e-06	NC_040051.1	25689118	25698460	+	NC_040057.1	2812047	2913128	+	--	XP_009468429.1 PREDICTED: LOW QUALITY PROTEIN: unconventional myosin-Va [Nipponia nippon]	-	-	-	-	-	-	-
XR_001192252.3	--	TCONS_00047643	MYO5A	0.955707	0.000210087	NC_040046.1	27989435	28007208	+	NC_040057.1	2812047	2913128	+	--	XP_009468429.1 PREDICTED: LOW QUALITY PROTEIN: unconventional myosin-Va [Nipponia nippon]	-	-	-	-	-	-	-
XR_001194425.3	--	TCONS_00047643	MYO5A	0.965462	0.000100352	NC_040060.1	17207203	17319182	+	NC_040057.1	2812047	2913128	+	--	XP_009468429.1 PREDICTED: LOW QUALITY PROTEIN: unconventional myosin-Va [Nipponia nippon]	-	-	-	-	-	-	-
TCONS_00044239	--	TCONS_00047650	NR13	0.962977	0.000123372	NC_040055.1	14408228	14499956	+	NC_040057.1	2979758	2983292	+	--	XP_014729608.1 PREDICTED: bcl-2-like protein 10 isoform X1 [Sturnus vulgaris]	-	-	-	-	GO:0031224//intrinsic component of membrane;GO:0044425//membrane part;GO:0016020//membrane	-	GO:0012501//programmed cell death;GO:0006915//apoptotic process;GO:0016265//death;GO:0044763//single-organism cellular process;GO:0009987//cellular process;GO:0044699//single-organism process;GO:0008219//cell death
XR_003492889.1	--	TCONS_00047650	NR13	0.968378	7.72e-05	NC_040075.1	23733618	23740832	+	NC_040057.1	2979758	2983292	+	--	XP_014729608.1 PREDICTED: bcl-2-like protein 10 isoform X1 [Sturnus vulgaris]	-	-	-	-	GO:0031224//intrinsic component of membrane;GO:0044425//membrane part;GO:0016020//membrane	-	GO:0012501//programmed cell death;GO:0006915//apoptotic process;GO:0016265//death;GO:0044763//single-organism cellular process;GO:0009987//cellular process;GO:0044699//single-organism process;GO:0008219//cell death
TCONS_00000285	--	TCONS_00049676	PLXNB1	0.951364	0.000277233	NC_040046.1	8404934	8425213	+	NC_040058.1	21726099	21799939	+	--	XP_005026038.1 PREDICTED: plexin-B1 [Anas platyrhynchos]	Organismal Systems	Development	ko04360//Axon guidance	K06821	GO:0044425//membrane part;GO:0005623//cell;GO:0016020//membrane;GO:0031224//intrinsic component of membrane;GO:0044464//cell part	GO:0005488//binding;GO:0060089//molecular transducer activity;GO:0005515//protein binding	GO:0044763//single-organism cellular process;GO:0016043//cellular component organization;GO:0032990//cell part morphogenesis;GO:0044699//single-organism process;GO:0008285//negative regulation of cell proliferation;GO:0022604//regulation of cell morphogenesis;GO:0033043//regulation of organelle organization;GO:0009966//regulation of signal transduction;GO:0007154//cell communication;GO:0014066//r…
TCONS_00014904	--	TCONS_00049676	PLXNB1	0.954348	0.000229794	NC_040047.1	49147767	49281700	-	NC_040058.1	21726099	21799939	+	--	XP_005026038.1 PREDICTED: plexin-B1 [Anas platyrhynchos]	Organismal Systems	Development	ko04360//Axon guidance	K06821	GO:0044425//membrane part;GO:0005623//cell;GO:0016020//membrane;GO:0031224//intrinsic component of membrane;GO:0044464//cell part	GO:0005488//binding;GO:0060089//molecular transducer activity;GO:0005515//protein binding	GO:0044763//single-organism cellular process;GO:0016043//cellular component organization;GO:0032990//cell part morphogenesis;GO:0044699//single-organism process;GO:0008285//negative regulation of cell proliferation;GO:0022604//regulation of cell morphogenesis;GO:0033043//regulation of organelle organization;GO:0009966//regulation of signal transduction;GO:0007154//cell communication;GO:0014066//r…
TCONS_00052324	--	TCONS_00049676	PLXNB1	0.977803	2.69e-05	NC_040060.1	6448534	6455985	+	NC_040058.1	21726099	21799939	+	--	XP_005026038.1 PREDICTED: plexin-B1 [Anas platyrhynchos]	Organismal Systems	Development	ko04360//Axon guidance	K06821	GO:0044425//membrane part;GO:0005623//cell;GO:0016020//membrane;GO:0031224//intrinsic component of membrane;GO:0044464//cell part	GO:0005488//binding;GO:0060089//molecular transducer activity;GO:0005515//protein binding	GO:0044763//single-organism cellular process;GO:0016043//cellular component organization;GO:0032990//cell part morphogenesis;GO:0044699//single-organism process;GO:0008285//negative regulation of cell proliferation;GO:0022604//regulation of cell morphogenesis;GO:0033043//regulation of organelle organization;GO:0009966//regulation of signal transduction;GO:0007154//cell communication;GO:0014066//r…
TCONS_00066773	--	TCONS_00049676	PLXNB1	0.958973	0.000167371	NC_040075.1	21782117	21795286	+	NC_040058.1	21726099	21799939	+	--	XP_005026038.1 PREDICTED: plexin-B1 [Anas platyrhynchos]	Organismal Systems	Development	ko04360//Axon guidance	K06821	GO:0044425//membrane part;GO:0005623//cell;GO:0016020//membrane;GO:0031224//intrinsic component of membrane;GO:0044464//cell part	GO:0005488//binding;GO:0060089//molecular transducer activity;GO:0005515//protein binding	GO:0044763//single-organism cellular process;GO:0016043//cellular component organization;GO:0032990//cell part morphogenesis;GO:0044699//single-organism process;GO:0008285//negative regulation of cell proliferation;GO:0022604//regulation of cell morphogenesis;GO:0033043//regulation of organelle organization;GO:0009966//regulation of signal transduction;GO:0007154//cell communication;GO:0014066//r…
XR_001192252.3	--	TCONS_00049676	PLXNB1	0.963952	0.000113968	NC_040046.1	27989435	28007208	+	NC_040058.1	21726099	21799939	+	--	XP_005026038.1 PREDICTED: plexin-B1 [Anas platyrhynchos]	Organismal Systems	Development	ko04360//Axon guidance	K06821	GO:0044425//membrane part;GO:0005623//cell;GO:0016020//membrane;GO:0031224//intrinsic component of membrane;GO:0044464//cell part	GO:0005488//binding;GO:0060089//molecular transducer activity;GO:0005515//protein binding	GO:0044763//single-organism cellular process;GO:0016043//cellular component organization;GO:0032990//cell part morphogenesis;GO:0044699//single-organism process;GO:0008285//negative regulation of cell proliferation;GO:0022604//regulation of cell morphogenesis;GO:0033043//regulation of organelle organization;GO:0009966//regulation of signal transduction;GO:0007154//cell communication;GO:0014066//r…
TCONS_00026124	--	TCONS_00049787	CNTN4	0.982229	1.38e-05	NC_040049.1	12250235	12283307	-	NC_040058.1	2177390	2234716	-	--	EOB01093.1 Contactin-4, partial [Anas platyrhynchos]	-	-	-	-	-	-	GO:0048519//negative regulation of biological process;GO:0065007//biological regulation;GO:0048523//negative regulation of cellular process;GO:0050793//regulation of developmental process;GO:0051093//negative regulation of developmental process;GO:0050789//regulation of biological process;GO:0045595//regulation of cell differentiation;GO:0045596//negative regulation of cell differentiation;GO:005…
TCONS_00034887	--	TCONS_00049787	CNTN4	0.972649	5.01e-05	NC_040051.1	23189695	23192304	-	NC_040058.1	2177390	2234716	-	--	EOB01093.1 Contactin-4, partial [Anas platyrhynchos]	-	-	-	-	-	-	GO:0048519//negative regulation of biological process;GO:0065007//biological regulation;GO:0048523//negative regulation of cellular process;GO:0050793//regulation of developmental process;GO:0051093//negative regulation of developmental process;GO:0050789//regulation of biological process;GO:0045595//regulation of cell differentiation;GO:0045596//negative regulation of cell differentiation;GO:005…
XR_003495427.1	--	TCONS_00049787	CNTN4	0.988839	3.45e-06	NC_040047.1	68314617	68321553	+	NC_040058.1	2177390	2234716	-	--	EOB01093.1 Contactin-4, partial [Anas platyrhynchos]	-	-	-	-	-	-	GO:0048519//negative regulation of biological process;GO:0065007//biological regulation;GO:0048523//negative regulation of cellular process;GO:0050793//regulation of developmental process;GO:0051093//negative regulation of developmental process;GO:0050789//regulation of biological process;GO:0045595//regulation of cell differentiation;GO:0045596//negative regulation of cell differentiation;GO:005…
TCONS_00033547	--	TCONS_00049848	PPP4R2	0.96663	9.06e-05	NC_040051.1	26275893	26278921	+	NC_040058.1	3888877	3919809	-	--	NP_001006142.1 serine/threonine-protein phosphatase 4 regulatory subunit 2 [Gallus gallus]	-	-	-	-	-	-	-
TCONS_00066780	--	TCONS_00049848	PPP4R2	0.963123	0.00012193	NC_040075.1	21803501	21845876	+	NC_040058.1	3888877	3919809	-	--	NP_001006142.1 serine/threonine-protein phosphatase 4 regulatory subunit 2 [Gallus gallus]	-	-	-	-	-	-	-
TCONS_00004494	--	TCONS_00050540	Zxdc	0.991134	1.73e-06	NC_040046.1	179430640	179461496	+	NC_040058.1	21048704	21059070	-	--	KFQ49058.1 Zinc finger protein ZXDC, partial [Nestor notabilis]	-	-	-	-	-	GO:0043169//cation binding;GO:0043167//ion binding;GO:0005488//binding	-
TCONS_00011835	--	TCONS_00050540	Zxdc	0.976887	3.03e-05	NC_040047.1	57408380	57409820	+	NC_040058.1	21048704	21059070	-	--	KFQ49058.1 Zinc finger protein ZXDC, partial [Nestor notabilis]	-	-	-	-	-	GO:0043169//cation binding;GO:0043167//ion binding;GO:0005488//binding	-
TCONS_00036158	--	TCONS_00050540	Zxdc	0.95946	0.000161546	NC_040052.1	20755631	21004507	+	NC_040058.1	21048704	21059070	-	--	KFQ49058.1 Zinc finger protein ZXDC, partial [Nestor notabilis]	-	-	-	-	-	GO:0043169//cation binding;GO:0043167//ion binding;GO:0005488//binding	-
TCONS_00043935	--	TCONS_00050540	Zxdc	0.975471	3.62e-05	NC_040055.1	7229449	7260389	+	NC_040058.1	21048704	21059070	-	--	KFQ49058.1 Zinc finger protein ZXDC, partial [Nestor notabilis]	-	-	-	-	-	GO:0043169//cation binding;GO:0043167//ion binding;GO:0005488//binding	-
XR_002402151.2	--	TCONS_00050540	Zxdc	0.98924	3.09e-06	NC_040047.1	126841725	126848791	-	NC_040058.1	21048704	21059070	-	--	KFQ49058.1 Zinc finger protein ZXDC, partial [Nestor notabilis]	-	-	-	-	-	GO:0043169//cation binding;GO:0043167//ion binding;GO:0005488//binding	-
XR_003497509.1	--	TCONS_00050540	Zxdc	0.958158	0.000177444	NC_040050.1	61187374	61379338	-	NC_040058.1	21048704	21059070	-	--	KFQ49058.1 Zinc finger protein ZXDC, partial [Nestor notabilis]	-	-	-	-	-	GO:0043169//cation binding;GO:0043167//ion binding;GO:0005488//binding	-
XR_003498432.1	--	TCONS_00050540	Zxdc	0.988956	3.34e-06	NC_040052.1	15282755	15317050	-	NC_040058.1	21048704	21059070	-	--	KFQ49058.1 Zinc finger protein ZXDC, partial [Nestor notabilis]	-	-	-	-	-	GO:0043169//cation binding;GO:0043167//ion binding;GO:0005488//binding	-
XR_003497816.1	--	TCONS_00052955	MIEF2	0.9599	0.000156394	NC_040050.1	30895238	30900671	-	NC_040060.1	2926737	2930727	-	--	XP_011577576.1 PREDICTED: mitochondrial dynamics protein MID49 [Aquila chrysaetos canadensis]	-	-	-	-	GO:0044446//intracellular organelle part;GO:0016020//membrane;GO:0005739//mitochondrion;GO:0031975//envelope;GO:0043226//organelle;GO:0031090//organelle membrane;GO:0044424//intracellular part;GO:0005623//cell;GO:0043227//membrane-bounded organelle;GO:0044444//cytoplasmic part;GO:0031967//organelle envelope;GO:0043231//intracellular membrane-bounded organelle;GO:0044422//organelle part;GO:0005622…	-	GO:0051128//regulation of cellular component organization;GO:0050794//regulation of cellular process;GO:0051130//positive regulation of cellular component organization;GO:0050789//regulation of biological process;GO:0032459//regulation of protein oligomerization;GO:0048522//positive regulation of cellular process;GO:0043254//regulation of protein complex assembly;GO:0010822//positive regulation o…
XR_003500093.1	--	TCONS_00052955	MIEF2	-0.972228	5.24e-05	NC_040057.1	12378042	12386253	-	NC_040060.1	2926737	2930727	-	--	XP_011577576.1 PREDICTED: mitochondrial dynamics protein MID49 [Aquila chrysaetos canadensis]	-	-	-	-	GO:0044446//intracellular organelle part;GO:0016020//membrane;GO:0005739//mitochondrion;GO:0031975//envelope;GO:0043226//organelle;GO:0031090//organelle membrane;GO:0044424//intracellular part;GO:0005623//cell;GO:0043227//membrane-bounded organelle;GO:0044444//cytoplasmic part;GO:0031967//organelle envelope;GO:0043231//intracellular membrane-bounded organelle;GO:0044422//organelle part;GO:0005622…	-	GO:0051128//regulation of cellular component organization;GO:0050794//regulation of cellular process;GO:0051130//positive regulation of cellular component organization;GO:0050789//regulation of biological process;GO:0032459//regulation of protein oligomerization;GO:0048522//positive regulation of cellular process;GO:0043254//regulation of protein complex assembly;GO:0010822//positive regulation o…
TCONS_00047824	--	TCONS_00054592	SLC5A1	0.956095	0.000204677	NC_040057.1	8361864	8369307	+	NC_040061.1	6795470	6844868	-	--	EOA96279.1 Sodium/glucose cotransporter 1, partial [Anas platyrhynchos]	Organismal Systems	Digestive system	ko04976//Bile secretion;ko04973//Carbohydrate digestion and absorption;ko04978//Mineral absorption	K14158	GO:0044425//membrane part;GO:0031224//intrinsic component of membrane;GO:0016020//membrane	-	GO:0051234//establishment of localization;GO:0051179//localization;GO:0044763//single-organism cellular process;GO:0044699//single-organism process;GO:0009987//cellular process
XR_002401822.2	--	TCONS_00054739	FBXO21	0.97501	3.83e-05	NC_040048.1	6291879	6362529	+	NC_040061.1	9425321	9445526	-	--	EOA95981.1 F-box only protein 21, partial [Anas platyrhynchos]	-	-	-	-	-	-	-
XR_003496923.1	--	TCONS_00054739	FBXO21	0.976895	3.03e-05	NC_040049.1	14693551	14751336	-	NC_040061.1	9425321	9445526	-	--	EOA95981.1 F-box only protein 21, partial [Anas platyrhynchos]	-	-	-	-	-	-	-
XR_003498444.1	--	TCONS_00054739	FBXO21	0.989669	2.74e-06	NC_040046.1	202009175	202011624	-	NC_040061.1	9425321	9445526	-	--	EOA95981.1 F-box only protein 21, partial [Anas platyrhynchos]	-	-	-	-	-	-	-
XR_003492935.1	--	TCONS_00054741	FBXO21	0.955146	0.000218079	NC_040075.1	71153275	71158556	+	NC_040061.1	9425321	9446421	-	--	EOA95981.1 F-box only protein 21, partial [Anas platyrhynchos]	-	-	-	-	-	-	-
TCONS_00014904	--	TCONS_00055315	Sapcd2	0.956745	0.000195824	NC_040047.1	49147767	49281700	-	NC_040063.1	203074	217994	+	--	EOB04910.1 Protein C9orf140-like protein, partial [Anas platyrhynchos]	-	-	-	-	GO:0043226//organelle;GO:0043232//intracellular non-membrane-bounded organelle;GO:0005623//cell;GO:0043228//non-membrane-bounded organelle;GO:0005622//intracellular;GO:0044464//cell part;GO:0043229//intracellular organelle;GO:0044424//intracellular part	-	-
XR_002405640.2	--	TCONS_00055315	Sapcd2	0.97045	6.31e-05	NC_040060.1	17243343	17249038	+	NC_040063.1	203074	217994	+	--	EOB04910.1 Protein C9orf140-like protein, partial [Anas platyrhynchos]	-	-	-	-	GO:0043226//organelle;GO:0043232//intracellular non-membrane-bounded organelle;GO:0005623//cell;GO:0043228//non-membrane-bounded organelle;GO:0005622//intracellular;GO:0044464//cell part;GO:0043229//intracellular organelle;GO:0044424//intracellular part	-	-
XR_003492841.1	--	TCONS_00055315	Sapcd2	0.967551	8.34e-05	NC_040075.1	67349384	67353659	+	NC_040063.1	203074	217994	+	--	EOB04910.1 Protein C9orf140-like protein, partial [Anas platyrhynchos]	-	-	-	-	GO:0043226//organelle;GO:0043232//intracellular non-membrane-bounded organelle;GO:0005623//cell;GO:0043228//non-membrane-bounded organelle;GO:0005622//intracellular;GO:0044464//cell part;GO:0043229//intracellular organelle;GO:0044424//intracellular part	-	-
XR_003500576.1	--	TCONS_00055315	Sapcd2	0.958617	0.000171724	NC_040059.1	13234770	13245850	-	NC_040063.1	203074	217994	+	--	EOB04910.1 Protein C9orf140-like protein, partial [Anas platyrhynchos]	-	-	-	-	GO:0043226//organelle;GO:0043232//intracellular non-membrane-bounded organelle;GO:0005623//cell;GO:0043228//non-membrane-bounded organelle;GO:0005622//intracellular;GO:0044464//cell part;GO:0043229//intracellular organelle;GO:0044424//intracellular part	-	-
TCONS_00002296	--	TCONS_00055542	SLC2A6	0.962994	0.000123207	NC_040046.1	111228085	111238806	+	NC_040063.1	6384226	6389253	+	--	XP_013049429.1 PREDICTED: solute carrier family 2, facilitated glucose transporter member 6 [Anser cygnoides domesticus]	-	-	-	-	GO:0044425//membrane part;GO:0016020//membrane;GO:0031224//intrinsic component of membrane	GO:0005215//transporter activity;GO:0022857//transmembrane transporter activity	GO:0044699//single-organism process;GO:0044763//single-organism cellular process;GO:0009987//cellular process;GO:0051234//establishment of localization;GO:0051179//localization
TCONS_00051877	--	TCONS_00055542	SLC2A6	0.966912	8.83e-05	NC_040059.1	13234159	13277368	-	NC_040063.1	6384226	6389253	+	--	XP_013049429.1 PREDICTED: solute carrier family 2, facilitated glucose transporter member 6 [Anser cygnoides domesticus]	-	-	-	-	GO:0044425//membrane part;GO:0016020//membrane;GO:0031224//intrinsic component of membrane	GO:0005215//transporter activity;GO:0022857//transmembrane transporter activity	GO:0044699//single-organism process;GO:0044763//single-organism cellular process;GO:0009987//cellular process;GO:0051234//establishment of localization;GO:0051179//localization
TCONS_00034887	--	TCONS_00055800	cuta	0.973397	4.61e-05	NC_040051.1	23189695	23192304	-	NC_040063.1	9215950	9225538	+	--	XP_011577906.1 PREDICTED: protein CutA [Aquila chrysaetos canadensis]	-	-	-	-	GO:0043226//organelle;GO:0043227//membrane-bounded organelle;GO:0031988//membrane-bounded vesicle;GO:0031982//vesicle	GO:0005515//protein binding;GO:0005488//binding	GO:0050896//response to stimulus;GO:0042221//response to chemical;GO:0010035//response to inorganic substance
XR_003496728.1	--	TCONS_00055932	Tesk2	0.965497	0.000100046	NC_040049.1	70548457	70550082	-	NC_040063.1	51849	86813	-	--	XP_005014871.1 PREDICTED: dual specificity testis-specific protein kinase 2-like isoform X1 [Anas platyrhynchos]	-	-	-	-	-	GO:0032550//purine ribonucleoside binding;GO:0016740//transferase activity;GO:0001883//purine nucleoside binding;GO:0036094//small molecule binding;GO:0005488//binding;GO:0003824//catalytic activity;GO:0097159//organic cyclic compound binding;GO:0097367//carbohydrate derivative binding;GO:1901363//heterocyclic compound binding;GO:0032549//ribonucleoside binding;GO:0001882//nucleoside binding	GO:0036211//protein modification process;GO:0006464//cellular protein modification process;GO:0044238//primary metabolic process;GO:0044267//cellular protein metabolic process;GO:0009987//cellular process;GO:0044237//cellular metabolic process;GO:0044260//cellular macromolecule metabolic process;GO:0043412//macromolecule modification;GO:0043170//macromolecule metabolic process;GO:0019538//protein…
XR_001187502.2	--	TCONS_00056188	CACFD1	0.959707	0.00015864	NC_040048.1	21360533	21374573	-	NC_040063.1	6389107	6401809	-	--	XP_010569131.1 PREDICTED: calcium channel flower homolog [Haliaeetus leucocephalus]	-	-	-	-	GO:0044422//organelle part;GO:0044425//membrane part;GO:0031090//organelle membrane;GO:0031224//intrinsic component of membrane;GO:0031301//integral component of organelle membrane;GO:0031300//intrinsic component of organelle membrane;GO:0043226//organelle;GO:0016020//membrane;GO:0016021//integral component of membrane;GO:0043227//membrane-bounded organelle	-	GO:0006810//transport;GO:0072511//divalent inorganic cation transport;GO:0051234//establishment of localization;GO:0070838//divalent metal ion transport;GO:0006812//cation transport;GO:1902578//single-organism localization;GO:0006811//ion transport;GO:0006816//calcium ion transport;GO:0051179//localization;GO:0006897//endocytosis;GO:0030001//metal ion transport;GO:0016192//vesicle-mediated transp…
XR_002404149.2	--	TCONS_00056188	CACFD1	0.95122	0.000279674	NC_040049.1	75102297	75111170	+	NC_040063.1	6389107	6401809	-	--	XP_010569131.1 PREDICTED: calcium channel flower homolog [Haliaeetus leucocephalus]	-	-	-	-	GO:0044422//organelle part;GO:0044425//membrane part;GO:0031090//organelle membrane;GO:0031224//intrinsic component of membrane;GO:0031301//integral component of organelle membrane;GO:0031300//intrinsic component of organelle membrane;GO:0043226//organelle;GO:0016020//membrane;GO:0016021//integral component of membrane;GO:0043227//membrane-bounded organelle	-	GO:0006810//transport;GO:0072511//divalent inorganic cation transport;GO:0051234//establishment of localization;GO:0070838//divalent metal ion transport;GO:0006812//cation transport;GO:1902578//single-organism localization;GO:0006811//ion transport;GO:0006816//calcium ion transport;GO:0051179//localization;GO:0006897//endocytosis;GO:0030001//metal ion transport;GO:0016192//vesicle-mediated transp…
XR_003493626.1	--	TCONS_00056188	CACFD1	0.967259	8.56e-05	NW_020865513.1	99511	127117	-	NC_040063.1	6389107	6401809	-	--	XP_010569131.1 PREDICTED: calcium channel flower homolog [Haliaeetus leucocephalus]	-	-	-	-	GO:0044422//organelle part;GO:0044425//membrane part;GO:0031090//organelle membrane;GO:0031224//intrinsic component of membrane;GO:0031301//integral component of organelle membrane;GO:0031300//intrinsic component of organelle membrane;GO:0043226//organelle;GO:0016020//membrane;GO:0016021//integral component of membrane;GO:0043227//membrane-bounded organelle	-	GO:0006810//transport;GO:0072511//divalent inorganic cation transport;GO:0051234//establishment of localization;GO:0070838//divalent metal ion transport;GO:0006812//cation transport;GO:1902578//single-organism localization;GO:0006811//ion transport;GO:0006816//calcium ion transport;GO:0051179//localization;GO:0006897//endocytosis;GO:0030001//metal ion transport;GO:0016192//vesicle-mediated transp…
XR_003496543.1	--	TCONS_00056188	CACFD1	0.951794	0.000270026	NC_040048.1	81233801	81241482	+	NC_040063.1	6389107	6401809	-	--	XP_010569131.1 PREDICTED: calcium channel flower homolog [Haliaeetus leucocephalus]	-	-	-	-	GO:0044422//organelle part;GO:0044425//membrane part;GO:0031090//organelle membrane;GO:0031224//intrinsic component of membrane;GO:0031301//integral component of organelle membrane;GO:0031300//intrinsic component of organelle membrane;GO:0043226//organelle;GO:0016020//membrane;GO:0016021//integral component of membrane;GO:0043227//membrane-bounded organelle	-	GO:0006810//transport;GO:0072511//divalent inorganic cation transport;GO:0051234//establishment of localization;GO:0070838//divalent metal ion transport;GO:0006812//cation transport;GO:1902578//single-organism localization;GO:0006811//ion transport;GO:0006816//calcium ion transport;GO:0051179//localization;GO:0006897//endocytosis;GO:0030001//metal ion transport;GO:0016192//vesicle-mediated transp…
XR_003497532.1	--	TCONS_00056188	CACFD1	0.955112	0.000218572	NC_040050.1	27345810	27347757	+	NC_040063.1	6389107	6401809	-	--	XP_010569131.1 PREDICTED: calcium channel flower homolog [Haliaeetus leucocephalus]	-	-	-	-	GO:0044422//organelle part;GO:0044425//membrane part;GO:0031090//organelle membrane;GO:0031224//intrinsic component of membrane;GO:0031301//integral component of organelle membrane;GO:0031300//intrinsic component of organelle membrane;GO:0043226//organelle;GO:0016020//membrane;GO:0016021//integral component of membrane;GO:0043227//membrane-bounded organelle	-	GO:0006810//transport;GO:0072511//divalent inorganic cation transport;GO:0051234//establishment of localization;GO:0070838//divalent metal ion transport;GO:0006812//cation transport;GO:1902578//single-organism localization;GO:0006811//ion transport;GO:0006816//calcium ion transport;GO:0051179//localization;GO:0006897//endocytosis;GO:0030001//metal ion transport;GO:0016192//vesicle-mediated transp…
XR_003501547.1	--	TCONS_00056188	CACFD1	0.950447	0.000293002	NC_040066.1	4470374	4504211	+	NC_040063.1	6389107	6401809	-	--	XP_010569131.1 PREDICTED: calcium channel flower homolog [Haliaeetus leucocephalus]	-	-	-	-	GO:0044422//organelle part;GO:0044425//membrane part;GO:0031090//organelle membrane;GO:0031224//intrinsic component of membrane;GO:0031301//integral component of organelle membrane;GO:0031300//intrinsic component of organelle membrane;GO:0043226//organelle;GO:0016020//membrane;GO:0016021//integral component of membrane;GO:0043227//membrane-bounded organelle	-	GO:0006810//transport;GO:0072511//divalent inorganic cation transport;GO:0051234//establishment of localization;GO:0070838//divalent metal ion transport;GO:0006812//cation transport;GO:1902578//single-organism localization;GO:0006811//ion transport;GO:0006816//calcium ion transport;GO:0051179//localization;GO:0006897//endocytosis;GO:0030001//metal ion transport;GO:0016192//vesicle-mediated transp…
TCONS_00014972	--	TCONS_00057245	Pecam1	0.972849	4.9e-05	NC_040047.1	51236897	51241731	-	NC_040064.1	1361890	1403917	-	--	XP_005012355.2 PREDICTED: platelet endothelial cell adhesion molecule isoform X2 [Anas platyrhynchos]	Environmental Information Processing;Organismal Systems;Human Diseases	Infectious diseases;Cardiovascular diseases;Immune system;Signaling molecules and interaction	ko04514//Cell adhesion molecules (CAMs);ko05418//Fluid shear stress and atherosclerosis;ko04670//Leukocyte transendothelial migration;ko05144//Malaria	K06471	GO:0043292//contractile fiber;GO:0071944//cell periphery;GO:0005737//cytoplasm;GO:0043226//organelle;GO:0098589//membrane region;GO:0016020//membrane;GO:0005886//plasma membrane;GO:0044464//cell part;GO:0005623//cell;GO:0044444//cytoplasmic part;GO:0098805//whole membrane;GO:0043228//non-membrane-bounded organelle;GO:0005622//intracellular;GO:0044424//intracellular part;GO:0044459//plasma membran…	-	GO:0044700//single organism signaling;GO:0042522//regulation of tyrosine phosphorylation of Stat5 protein;GO:0023051//regulation of signaling;GO:0065007//biological regulation;GO:0051674//localization of cell;GO:0051179//localization;GO:0019222//regulation of metabolic process;GO:0051716//cellular response to stimulus;GO:0010646//regulation of cell communication;GO:0009987//cellular process;GO:00…
TCONS_00016553	--	TCONS_00057245	Pecam1	0.962713	0.000126001	NC_040047.1	126719400	126724488	-	NC_040064.1	1361890	1403917	-	--	XP_005012355.2 PREDICTED: platelet endothelial cell adhesion molecule isoform X2 [Anas platyrhynchos]	Environmental Information Processing;Organismal Systems;Human Diseases	Infectious diseases;Cardiovascular diseases;Immune system;Signaling molecules and interaction	ko04514//Cell adhesion molecules (CAMs);ko05418//Fluid shear stress and atherosclerosis;ko04670//Leukocyte transendothelial migration;ko05144//Malaria	K06471	GO:0043292//contractile fiber;GO:0071944//cell periphery;GO:0005737//cytoplasm;GO:0043226//organelle;GO:0098589//membrane region;GO:0016020//membrane;GO:0005886//plasma membrane;GO:0044464//cell part;GO:0005623//cell;GO:0044444//cytoplasmic part;GO:0098805//whole membrane;GO:0043228//non-membrane-bounded organelle;GO:0005622//intracellular;GO:0044424//intracellular part;GO:0044459//plasma membran…	-	GO:0044700//single organism signaling;GO:0042522//regulation of tyrosine phosphorylation of Stat5 protein;GO:0023051//regulation of signaling;GO:0065007//biological regulation;GO:0051674//localization of cell;GO:0051179//localization;GO:0019222//regulation of metabolic process;GO:0051716//cellular response to stimulus;GO:0010646//regulation of cell communication;GO:0009987//cellular process;GO:00…
XR_003496285.1	--	TCONS_00057245	Pecam1	0.956164	0.000203719	NC_040048.1	38866531	39280193	-	NC_040064.1	1361890	1403917	-	--	XP_005012355.2 PREDICTED: platelet endothelial cell adhesion molecule isoform X2 [Anas platyrhynchos]	Environmental Information Processing;Organismal Systems;Human Diseases	Infectious diseases;Cardiovascular diseases;Immune system;Signaling molecules and interaction	ko04514//Cell adhesion molecules (CAMs);ko05418//Fluid shear stress and atherosclerosis;ko04670//Leukocyte transendothelial migration;ko05144//Malaria	K06471	GO:0043292//contractile fiber;GO:0071944//cell periphery;GO:0005737//cytoplasm;GO:0043226//organelle;GO:0098589//membrane region;GO:0016020//membrane;GO:0005886//plasma membrane;GO:0044464//cell part;GO:0005623//cell;GO:0044444//cytoplasmic part;GO:0098805//whole membrane;GO:0043228//non-membrane-bounded organelle;GO:0005622//intracellular;GO:0044424//intracellular part;GO:0044459//plasma membran…	-	GO:0044700//single organism signaling;GO:0042522//regulation of tyrosine phosphorylation of Stat5 protein;GO:0023051//regulation of signaling;GO:0065007//biological regulation;GO:0051674//localization of cell;GO:0051179//localization;GO:0019222//regulation of metabolic process;GO:0051716//cellular response to stimulus;GO:0010646//regulation of cell communication;GO:0009987//cellular process;GO:00…
XR_001187340.3	--	TCONS_00057580	dus3l	0.973961	4.33e-05	NC_040065.1	8166519	8224746	-	NC_040065.1	48990	56179	+	--	XP_005029270.1 PREDICTED: tRNA-dihydrouridine(47) synthase [NAD(P)(+)]-like, partial [Anas platyrhynchos]	-	-	-	-	-	-	-
XR_003492943.1	--	TCONS_00057580	dus3l	0.960352	0.000151217	NC_040075.1	63185899	63189487	+	NC_040065.1	48990	56179	+	--	XP_005029270.1 PREDICTED: tRNA-dihydrouridine(47) synthase [NAD(P)(+)]-like, partial [Anas platyrhynchos]	-	-	-	-	-	-	-
XR_003500725.1	--	TCONS_00057580	dus3l	0.951766	0.000270499	NC_040060.1	14389696	14468946	-	NC_040065.1	48990	56179	+	--	XP_005029270.1 PREDICTED: tRNA-dihydrouridine(47) synthase [NAD(P)(+)]-like, partial [Anas platyrhynchos]	-	-	-	-	-	-	-
XR_003494014.1	--	TCONS_00058034	Smtnl2	0.950582	0.000290638	NW_020866079.1	9003	9887	+	NC_040065.1	5344348	5374530	+	--	XP_013048925.1 PREDICTED: smoothelin-like protein 2 isoform X1 [Anser cygnoides domesticus]	-	-	-	-	-	-	-
XR_217450.4	--	TCONS_00058034	Smtnl2	0.951086	0.000281949	NC_040063.1	2714704	2717526	-	NC_040065.1	5344348	5374530	+	--	XP_013048925.1 PREDICTED: smoothelin-like protein 2 isoform X1 [Anser cygnoides domesticus]	-	-	-	-	-	-	-
TCONS_00004494	--	TCONS_00059416	PREX1	0.957577	0.000184857	NC_040046.1	179430640	179461496	+	NC_040066.1	826801	937867	+	--	XP_005016448.1 PREDICTED: phosphatidylinositol 3,4,5-trisphosphate-dependent Rac exchanger 1 protein isoform X2 [Anas platyrhynchos]	Human Diseases;Organismal Systems	Immune system;Infectious diseases	ko05167//Kaposi sarcoma-associated herpesvirus infection;ko04062//Chemokine signaling pathway	K12365	GO:0044424//intracellular part;GO:0043227//membrane-bounded organelle;GO:0005737//cytoplasm;GO:0044444//cytoplasmic part;GO:0005622//intracellular;GO:0005623//cell;GO:0044464//cell part;GO:0043226//organelle	GO:0005488//binding;GO:0008289//lipid binding	GO:0048856//anatomical structure development;GO:0006928//movement of cell or subcellular component;GO:0022610//biological adhesion;GO:0048870//cell motility;GO:0070887//cellular response to chemical stimulus;GO:0044767//single-organism developmental process;GO:0007166//cell surface receptor signaling pathway;GO:0007155//cell adhesion;GO:0097529//myeloid leukocyte migration;GO:0071621//granulocyte…
TCONS_00011835	--	TCONS_00059416	PREX1	0.986958	5.49e-06	NC_040047.1	57408380	57409820	+	NC_040066.1	826801	937867	+	--	XP_005016448.1 PREDICTED: phosphatidylinositol 3,4,5-trisphosphate-dependent Rac exchanger 1 protein isoform X2 [Anas platyrhynchos]	Human Diseases;Organismal Systems	Immune system;Infectious diseases	ko05167//Kaposi sarcoma-associated herpesvirus infection;ko04062//Chemokine signaling pathway	K12365	GO:0044424//intracellular part;GO:0043227//membrane-bounded organelle;GO:0005737//cytoplasm;GO:0044444//cytoplasmic part;GO:0005622//intracellular;GO:0005623//cell;GO:0044464//cell part;GO:0043226//organelle	GO:0005488//binding;GO:0008289//lipid binding	GO:0048856//anatomical structure development;GO:0006928//movement of cell or subcellular component;GO:0022610//biological adhesion;GO:0048870//cell motility;GO:0070887//cellular response to chemical stimulus;GO:0044767//single-organism developmental process;GO:0007166//cell surface receptor signaling pathway;GO:0007155//cell adhesion;GO:0097529//myeloid leukocyte migration;GO:0071621//granulocyte…
TCONS_00036158	--	TCONS_00059416	PREX1	0.950641	0.000289616	NC_040052.1	20755631	21004507	+	NC_040066.1	826801	937867	+	--	XP_005016448.1 PREDICTED: phosphatidylinositol 3,4,5-trisphosphate-dependent Rac exchanger 1 protein isoform X2 [Anas platyrhynchos]	Human Diseases;Organismal Systems	Immune system;Infectious diseases	ko05167//Kaposi sarcoma-associated herpesvirus infection;ko04062//Chemokine signaling pathway	K12365	GO:0044424//intracellular part;GO:0043227//membrane-bounded organelle;GO:0005737//cytoplasm;GO:0044444//cytoplasmic part;GO:0005622//intracellular;GO:0005623//cell;GO:0044464//cell part;GO:0043226//organelle	GO:0005488//binding;GO:0008289//lipid binding	GO:0048856//anatomical structure development;GO:0006928//movement of cell or subcellular component;GO:0022610//biological adhesion;GO:0048870//cell motility;GO:0070887//cellular response to chemical stimulus;GO:0044767//single-organism developmental process;GO:0007166//cell surface receptor signaling pathway;GO:0007155//cell adhesion;GO:0097529//myeloid leukocyte migration;GO:0071621//granulocyte…
TCONS_00043935	--	TCONS_00059416	PREX1	0.968774	7.43e-05	NC_040055.1	7229449	7260389	+	NC_040066.1	826801	937867	+	--	XP_005016448.1 PREDICTED: phosphatidylinositol 3,4,5-trisphosphate-dependent Rac exchanger 1 protein isoform X2 [Anas platyrhynchos]	Human Diseases;Organismal Systems	Immune system;Infectious diseases	ko05167//Kaposi sarcoma-associated herpesvirus infection;ko04062//Chemokine signaling pathway	K12365	GO:0044424//intracellular part;GO:0043227//membrane-bounded organelle;GO:0005737//cytoplasm;GO:0044444//cytoplasmic part;GO:0005622//intracellular;GO:0005623//cell;GO:0044464//cell part;GO:0043226//organelle	GO:0005488//binding;GO:0008289//lipid binding	GO:0048856//anatomical structure development;GO:0006928//movement of cell or subcellular component;GO:0022610//biological adhesion;GO:0048870//cell motility;GO:0070887//cellular response to chemical stimulus;GO:0044767//single-organism developmental process;GO:0007166//cell surface receptor signaling pathway;GO:0007155//cell adhesion;GO:0097529//myeloid leukocyte migration;GO:0071621//granulocyte…
XR_002402151.2	--	TCONS_00059416	PREX1	0.99607	1.51e-07	NC_040047.1	126841725	126848791	-	NC_040066.1	826801	937867	+	--	XP_005016448.1 PREDICTED: phosphatidylinositol 3,4,5-trisphosphate-dependent Rac exchanger 1 protein isoform X2 [Anas platyrhynchos]	Human Diseases;Organismal Systems	Immune system;Infectious diseases	ko05167//Kaposi sarcoma-associated herpesvirus infection;ko04062//Chemokine signaling pathway	K12365	GO:0044424//intracellular part;GO:0043227//membrane-bounded organelle;GO:0005737//cytoplasm;GO:0044444//cytoplasmic part;GO:0005622//intracellular;GO:0005623//cell;GO:0044464//cell part;GO:0043226//organelle	GO:0005488//binding;GO:0008289//lipid binding	GO:0048856//anatomical structure development;GO:0006928//movement of cell or subcellular component;GO:0022610//biological adhesion;GO:0048870//cell motility;GO:0070887//cellular response to chemical stimulus;GO:0044767//single-organism developmental process;GO:0007166//cell surface receptor signaling pathway;GO:0007155//cell adhesion;GO:0097529//myeloid leukocyte migration;GO:0071621//granulocyte…
XR_003497509.1	--	TCONS_00059416	PREX1	0.971401	5.72e-05	NC_040050.1	61187374	61379338	-	NC_040066.1	826801	937867	+	--	XP_005016448.1 PREDICTED: phosphatidylinositol 3,4,5-trisphosphate-dependent Rac exchanger 1 protein isoform X2 [Anas platyrhynchos]	Human Diseases;Organismal Systems	Immune system;Infectious diseases	ko05167//Kaposi sarcoma-associated herpesvirus infection;ko04062//Chemokine signaling pathway	K12365	GO:0044424//intracellular part;GO:0043227//membrane-bounded organelle;GO:0005737//cytoplasm;GO:0044444//cytoplasmic part;GO:0005622//intracellular;GO:0005623//cell;GO:0044464//cell part;GO:0043226//organelle	GO:0005488//binding;GO:0008289//lipid binding	GO:0048856//anatomical structure development;GO:0006928//movement of cell or subcellular component;GO:0022610//biological adhesion;GO:0048870//cell motility;GO:0070887//cellular response to chemical stimulus;GO:0044767//single-organism developmental process;GO:0007166//cell surface receptor signaling pathway;GO:0007155//cell adhesion;GO:0097529//myeloid leukocyte migration;GO:0071621//granulocyte…
XR_003498432.1	--	TCONS_00059416	PREX1	0.993575	6.6e-07	NC_040052.1	15282755	15317050	-	NC_040066.1	826801	937867	+	--	XP_005016448.1 PREDICTED: phosphatidylinositol 3,4,5-trisphosphate-dependent Rac exchanger 1 protein isoform X2 [Anas platyrhynchos]	Human Diseases;Organismal Systems	Immune system;Infectious diseases	ko05167//Kaposi sarcoma-associated herpesvirus infection;ko04062//Chemokine signaling pathway	K12365	GO:0044424//intracellular part;GO:0043227//membrane-bounded organelle;GO:0005737//cytoplasm;GO:0044444//cytoplasmic part;GO:0005622//intracellular;GO:0005623//cell;GO:0044464//cell part;GO:0043226//organelle	GO:0005488//binding;GO:0008289//lipid binding	GO:0048856//anatomical structure development;GO:0006928//movement of cell or subcellular component;GO:0022610//biological adhesion;GO:0048870//cell motility;GO:0070887//cellular response to chemical stimulus;GO:0044767//single-organism developmental process;GO:0007166//cell surface receptor signaling pathway;GO:0007155//cell adhesion;GO:0097529//myeloid leukocyte migration;GO:0071621//granulocyte…
TCONS_00012101	--	TCONS_00060725	SIRPA	0.957325	0.000188134	NC_040047.1	68277002	68338068	+	NC_040066.1	14643135	14646213	-	--	XP_012964684.1 PREDICTED: signal-regulatory protein beta-1-like isoform X2 [Anas platyrhynchos]	-	-	-	-	-	-	-
XR_002398923.2	--	TCONS_00060860	SLC35C2	-0.95556	0.000212159	NC_040064.1	849539	901316	-	NC_040066.1	15785502	15792307	-	--	XP_014109560.1 PREDICTED: solute carrier family 35 member C2 isoform X2 [Pseudopodoces humilis]	-	-	-	-	GO:0005623//cell;GO:0043226//organelle;GO:0031224//intrinsic component of membrane;GO:0044425//membrane part;GO:0005622//intracellular;GO:0044424//intracellular part;GO:0016020//membrane;GO:0043231//intracellular membrane-bounded organelle;GO:0043227//membrane-bounded organelle;GO:0043229//intracellular organelle;GO:0044464//cell part	-	GO:1901576//organic substance biosynthetic process;GO:0005975//carbohydrate metabolic process;GO:0034645//cellular macromolecule biosynthetic process;GO:0009966//regulation of signal transduction;GO:0043412//macromolecule modification;GO:0044238//primary metabolic process;GO:0044710//single-organism metabolic process;GO:0006486//protein glycosylation;GO:0009101//glycoprotein biosynthetic process;…
XR_001190902.3	--	TCONS_00061993	GPR124	0.957449	0.00018651	NC_040050.1	47693140	47711270	+	NC_040068.1	1586858	1607623	+	--	XP_015152910.1 PREDICTED: G-protein coupled receptor 124 isoform X1 [Gallus gallus]	-	-	-	-	GO:0044464//cell part;GO:0005623//cell;GO:0044425//membrane part;GO:0016020//membrane;GO:0031224//intrinsic component of membrane	GO:0004888//transmembrane signaling receptor activity;GO:0099600//transmembrane receptor activity;GO:0004872//receptor activity;GO:0060089//molecular transducer activity;GO:0004871//signal transducer activity;GO:0038023//signaling receptor activity	GO:0032502//developmental process;GO:0051716//cellular response to stimulus;GO:2000145//regulation of cell motility;GO:0048646//anatomical structure formation involved in morphogenesis;GO:0048585//negative regulation of response to stimulus;GO:0048583//regulation of response to stimulus;GO:0050793//regulation of developmental process;GO:0044700//single organism signaling;GO:0051239//regulation of…
TCONS_00013460	--	TCONS_00062142	XPO7	0.996937	7.17e-08	NC_040047.1	144636719	144654271	+	NC_040068.1	517944	548744	-	--	XP_005510928.1 PREDICTED: LOW QUALITY PROTEIN: exportin-7 [Columba livia]	-	-	-	-	GO:0043231//intracellular membrane-bounded organelle;GO:0043229//intracellular organelle;GO:0044424//intracellular part;GO:0098796//membrane protein complex;GO:0043226//organelle;GO:0032991//macromolecular complex;GO:0016021//integral component of membrane;GO:0044464//cell part;GO:0043234//protein complex;GO:0005622//intracellular;GO:0044425//membrane part;GO:0016020//membrane;GO:0005623//cell;GO…	GO:0031267//small GTPase binding;GO:0051020//GTPase binding;GO:0017016//Ras GTPase binding;GO:0019899//enzyme binding;GO:0005515//protein binding;GO:0005488//binding	GO:0046907//intracellular transport;GO:0015031//protein transport;GO:0034613//cellular protein localization;GO:0051234//establishment of localization;GO:0070727//cellular macromolecule localization;GO:0051649//establishment of localization in cell;GO:0008104//protein localization;GO:0051179//localization;GO:0045184//establishment of protein localization;GO:0071702//organic substance transport;GO:…
XR_002406750.2	--	TCONS_00062142	XPO7	0.951769	0.000270445	NC_040054.1	23272273	23289513	+	NC_040068.1	517944	548744	-	--	XP_005510928.1 PREDICTED: LOW QUALITY PROTEIN: exportin-7 [Columba livia]	-	-	-	-	GO:0043231//intracellular membrane-bounded organelle;GO:0043229//intracellular organelle;GO:0044424//intracellular part;GO:0098796//membrane protein complex;GO:0043226//organelle;GO:0032991//macromolecular complex;GO:0016021//integral component of membrane;GO:0044464//cell part;GO:0043234//protein complex;GO:0005622//intracellular;GO:0044425//membrane part;GO:0016020//membrane;GO:0005623//cell;GO…	GO:0031267//small GTPase binding;GO:0051020//GTPase binding;GO:0017016//Ras GTPase binding;GO:0019899//enzyme binding;GO:0005515//protein binding;GO:0005488//binding	GO:0046907//intracellular transport;GO:0015031//protein transport;GO:0034613//cellular protein localization;GO:0051234//establishment of localization;GO:0070727//cellular macromolecule localization;GO:0051649//establishment of localization in cell;GO:0008104//protein localization;GO:0051179//localization;GO:0045184//establishment of protein localization;GO:0071702//organic substance transport;GO:…
TCONS_00000285	--	TCONS_00062417	DCBLD1	0.969163	7.16e-05	NC_040046.1	8404934	8425213	+	NC_040069.1	3412607	3419506	+	--	XP_011582625.1 PREDICTED: discoidin, CUB and LCCL domain-containing protein 1-like [Aquila chrysaetos canadensis]	-	-	-	-	-	-	-
TCONS_00052324	--	TCONS_00062417	DCBLD1	0.950789	0.000287048	NC_040060.1	6448534	6455985	+	NC_040069.1	3412607	3419506	+	--	XP_011582625.1 PREDICTED: discoidin, CUB and LCCL domain-containing protein 1-like [Aquila chrysaetos canadensis]	-	-	-	-	-	-	-
TCONS_00056684	--	TCONS_00062417	DCBLD1	0.987223	5.17e-06	NC_040064.1	1512138	1518330	+	NC_040069.1	3412607	3419506	+	--	XP_011582625.1 PREDICTED: discoidin, CUB and LCCL domain-containing protein 1-like [Aquila chrysaetos canadensis]	-	-	-	-	-	-	-
TCONS_00066354	--	TCONS_00062417	DCBLD1	0.960613	0.000148278	NC_040075.1	86017	90236	+	NC_040069.1	3412607	3419506	+	--	XP_011582625.1 PREDICTED: discoidin, CUB and LCCL domain-containing protein 1-like [Aquila chrysaetos canadensis]	-	-	-	-	-	-	-
XR_001192252.3	--	TCONS_00062417	DCBLD1	0.968407	7.7e-05	NC_040046.1	27989435	28007208	+	NC_040069.1	3412607	3419506	+	--	XP_011582625.1 PREDICTED: discoidin, CUB and LCCL domain-containing protein 1-like [Aquila chrysaetos canadensis]	-	-	-	-	-	-	-
XR_003496278.1	--	TCONS_00062417	DCBLD1	0.958757	0.000169998	NC_040048.1	38565545	38586728	+	NC_040069.1	3412607	3419506	+	--	XP_011582625.1 PREDICTED: discoidin, CUB and LCCL domain-containing protein 1-like [Aquila chrysaetos canadensis]	-	-	-	-	-	-	-
XR_003500576.1	--	TCONS_00062417	DCBLD1	0.952354	0.000260831	NC_040059.1	13234770	13245850	-	NC_040069.1	3412607	3419506	+	--	XP_011582625.1 PREDICTED: discoidin, CUB and LCCL domain-containing protein 1-like [Aquila chrysaetos canadensis]	-	-	-	-	-	-	-
XR_003497816.1	--	TCONS_00063291	Arhgap32	0.960101	0.000154078	NC_040050.1	30895238	30900671	-	NC_040070.1	1355342	1615303	-	--	XP_012955080.1 PREDICTED: LOW QUALITY PROTEIN: rho GTPase-activating protein 32 [Anas platyrhynchos]	-	-	-	-	-	-	-
TCONS_00035441	--	TCONS_00064218	PRELP	0.96972	6.78e-05	NC_040052.1	1410970	1417508	+	NC_040072.1	3757511	3770251	+	--	KQL52029.1 prolargin [Amazona aestiva]	-	-	-	-	GO:0031982//vesicle;GO:0031988//membrane-bounded vesicle;GO:0043226//organelle;GO:0043227//membrane-bounded organelle;GO:0031012//extracellular matrix	-	GO:0032502//developmental process;GO:0044767//single-organism developmental process;GO:0007568//aging;GO:0044699//single-organism process
TCONS_00014972	--	TCONS_00064450	SLC41A1	0.971103	5.9e-05	NC_040047.1	51236897	51241731	-	NC_040072.1	409436	431155	-	--	XP_010176349.1 PREDICTED: solute carrier family 41 member 1 [Antrostomus carolinensis]	-	-	-	-	-	GO:0022857//transmembrane transporter activity;GO:0022891//substrate-specific transmembrane transporter activity;GO:0022892//substrate-specific transporter activity;GO:0005215//transporter activity;GO:0015075//ion transmembrane transporter activity	GO:0006812//cation transport;GO:0006811//ion transport;GO:1902578//single-organism localization;GO:0051234//establishment of localization;GO:0006810//transport;GO:0044699//single-organism process;GO:0044765//single-organism transport;GO:0051179//localization
TCONS_00016553	--	TCONS_00064450	SLC41A1	0.975556	3.58e-05	NC_040047.1	126719400	126724488	-	NC_040072.1	409436	431155	-	--	XP_010176349.1 PREDICTED: solute carrier family 41 member 1 [Antrostomus carolinensis]	-	-	-	-	-	GO:0022857//transmembrane transporter activity;GO:0022891//substrate-specific transmembrane transporter activity;GO:0022892//substrate-specific transporter activity;GO:0005215//transporter activity;GO:0015075//ion transmembrane transporter activity	GO:0006812//cation transport;GO:0006811//ion transport;GO:1902578//single-organism localization;GO:0051234//establishment of localization;GO:0006810//transport;GO:0044699//single-organism process;GO:0044765//single-organism transport;GO:0051179//localization
XR_003499027.1	--	TCONS_00064450	SLC41A1	0.96922	7.12e-05	NC_040054.1	25793029	25803278	+	NC_040072.1	409436	431155	-	--	XP_010176349.1 PREDICTED: solute carrier family 41 member 1 [Antrostomus carolinensis]	-	-	-	-	-	GO:0022857//transmembrane transporter activity;GO:0022891//substrate-specific transmembrane transporter activity;GO:0022892//substrate-specific transporter activity;GO:0005215//transporter activity;GO:0015075//ion transmembrane transporter activity	GO:0006812//cation transport;GO:0006811//ion transport;GO:1902578//single-organism localization;GO:0051234//establishment of localization;GO:0006810//transport;GO:0044699//single-organism process;GO:0044765//single-organism transport;GO:0051179//localization
TCONS_00069861	--	TCONS_00064612	MGAT4C	0.977861	2.67e-05	NW_020865203.1	14680	20907	-	NC_040072.1	3119300	3140450	-	--	XP_012949532.1 PREDICTED: alpha-1,3-mannosyl-glycoprotein 4-beta-N-acetylglucosaminyltransferase C-like [Anas platyrhynchos]	Metabolism	Glycan biosynthesis and metabolism;Global and overview maps	ko01100//Metabolic pathways;ko00510//N-Glycan biosynthesis	K13748	GO:0043231//intracellular membrane-bounded organelle;GO:0031090//organelle membrane;GO:0031224//intrinsic component of membrane;GO:0043227//membrane-bounded organelle;GO:0016020//membrane;GO:0005623//cell;GO:0043229//intracellular organelle;GO:0005622//intracellular;GO:0044464//cell part;GO:0044425//membrane part;GO:0044424//intracellular part;GO:0044422//organelle part;GO:0043226//organelle	GO:0003824//catalytic activity;GO:0016758//transferase activity, transferring hexosyl groups;GO:0005488//binding;GO:0043167//ion binding;GO:0016740//transferase activity;GO:0008194//UDP-glycosyltransferase activity;GO:0043169//cation binding;GO:0008375//acetylglucosaminyltransferase activity;GO:0016757//transferase activity, transferring glycosyl groups	GO:0009987//cellular process;GO:0008152//metabolic process;GO:0019538//protein metabolic process;GO:0043412//macromolecule modification;GO:0044237//cellular metabolic process;GO:0044238//primary metabolic process;GO:0036211//protein modification process;GO:0044267//cellular protein metabolic process;GO:0006464//cellular protein modification process;GO:0044260//cellular macromolecule metabolic pro…
XR_003495255.1	--	TCONS_00064612	MGAT4C	0.962053	0.000132749	NC_040047.1	33224495	33235560	+	NC_040072.1	3119300	3140450	-	--	XP_012949532.1 PREDICTED: alpha-1,3-mannosyl-glycoprotein 4-beta-N-acetylglucosaminyltransferase C-like [Anas platyrhynchos]	Metabolism	Glycan biosynthesis and metabolism;Global and overview maps	ko01100//Metabolic pathways;ko00510//N-Glycan biosynthesis	K13748	GO:0043231//intracellular membrane-bounded organelle;GO:0031090//organelle membrane;GO:0031224//intrinsic component of membrane;GO:0043227//membrane-bounded organelle;GO:0016020//membrane;GO:0005623//cell;GO:0043229//intracellular organelle;GO:0005622//intracellular;GO:0044464//cell part;GO:0044425//membrane part;GO:0044424//intracellular part;GO:0044422//organelle part;GO:0043226//organelle	GO:0003824//catalytic activity;GO:0016758//transferase activity, transferring hexosyl groups;GO:0005488//binding;GO:0043167//ion binding;GO:0016740//transferase activity;GO:0008194//UDP-glycosyltransferase activity;GO:0043169//cation binding;GO:0008375//acetylglucosaminyltransferase activity;GO:0016757//transferase activity, transferring glycosyl groups	GO:0009987//cellular process;GO:0008152//metabolic process;GO:0019538//protein metabolic process;GO:0043412//macromolecule modification;GO:0044237//cellular metabolic process;GO:0044238//primary metabolic process;GO:0036211//protein modification process;GO:0044267//cellular protein metabolic process;GO:0006464//cellular protein modification process;GO:0044260//cellular macromolecule metabolic pro…
XR_003496728.1	--	TCONS_00064612	MGAT4C	0.96491	0.00010519	NC_040049.1	70548457	70550082	-	NC_040072.1	3119300	3140450	-	--	XP_012949532.1 PREDICTED: alpha-1,3-mannosyl-glycoprotein 4-beta-N-acetylglucosaminyltransferase C-like [Anas platyrhynchos]	Metabolism	Glycan biosynthesis and metabolism;Global and overview maps	ko01100//Metabolic pathways;ko00510//N-Glycan biosynthesis	K13748	GO:0043231//intracellular membrane-bounded organelle;GO:0031090//organelle membrane;GO:0031224//intrinsic component of membrane;GO:0043227//membrane-bounded organelle;GO:0016020//membrane;GO:0005623//cell;GO:0043229//intracellular organelle;GO:0005622//intracellular;GO:0044464//cell part;GO:0044425//membrane part;GO:0044424//intracellular part;GO:0044422//organelle part;GO:0043226//organelle	GO:0003824//catalytic activity;GO:0016758//transferase activity, transferring hexosyl groups;GO:0005488//binding;GO:0043167//ion binding;GO:0016740//transferase activity;GO:0008194//UDP-glycosyltransferase activity;GO:0043169//cation binding;GO:0008375//acetylglucosaminyltransferase activity;GO:0016757//transferase activity, transferring glycosyl groups	GO:0009987//cellular process;GO:0008152//metabolic process;GO:0019538//protein metabolic process;GO:0043412//macromolecule modification;GO:0044237//cellular metabolic process;GO:0044238//primary metabolic process;GO:0036211//protein modification process;GO:0044267//cellular protein metabolic process;GO:0006464//cellular protein modification process;GO:0044260//cellular macromolecule metabolic pro…
XR_003493991.1	--	TCONS_00065655	STAT3	0.953299	0.000245797	NW_020865944.1	5179	6652	-	NC_040073.1	2851379	2865225	-	--	XP_009281052.1 PREDICTED: signal transducer and activator of transcription 3 isoform X2 [Aptenodytes forsteri]	Organismal Systems;Human Diseases;Cellular Processes;Environmental Information Processing	Cellular community - eukaryotes;Immune system;Infectious diseases;Endocrine and metabolic diseases;Drug resistance;Immune diseases;Cell growth and death;Signal transduction;Cancers;Endocrine system	ko05200//Pathways in cancer;ko05205//Proteoglycans in cancer;ko05163//Human cytomegalovirus infection;ko05206//MicroRNAs in cancer;ko05169//Epstein-Barr virus infection;ko05203//Viral carcinogenesis;ko05167//Kaposi sarcoma-associated herpesvirus infection;ko04062//Chemokine signaling pathway;ko04217//Necroptosis;ko04550//Signaling pathways regulating pluripotency of stem cells;ko04630//Jak-STAT s…	K04692	GO:0043229//intracellular organelle;GO:0043226//organelle;GO:0043227//membrane-bounded organelle;GO:0044424//intracellular part;GO:0043231//intracellular membrane-bounded organelle;GO:0005623//cell;GO:0016020//membrane;GO:0005622//intracellular;GO:0044464//cell part	GO:0005515//protein binding;GO:0003700//transcription factor activity, sequence-specific DNA binding;GO:0001067//regulatory region nucleic acid binding;GO:0005488//binding;GO:0001071//nucleic acid binding transcription factor activity;GO:0019900//kinase binding;GO:0003677//DNA binding;GO:0008134//transcription factor binding;GO:0019899//enzyme binding;GO:0019902//phosphatase binding;GO:0003676//n…	GO:0032502//developmental process;GO:0071310//cellular response to organic substance;GO:1900542//regulation of purine nucleotide metabolic process;GO:0051174//regulation of phosphorus metabolic process;GO:0019221//cytokine-mediated signaling pathway;GO:0035556//intracellular signal transduction;GO:0007610//behavior;GO:0040011//locomotion;GO:0023051//regulation of signaling;GO:0032501//multicellul…
TCONS_00033547	--	TCONS_00065768	Aoc3	0.961096	0.000142944	NC_040051.1	26275893	26278921	+	NC_040073.1	4481135	4484883	-	--	XP_013055219.1 PREDICTED: membrane primary amine oxidase-like [Anser cygnoides domesticus]	Metabolism	Global and overview maps;Amino acid metabolism;Metabolism of other amino acids	ko01100//Metabolic pathways;ko00410//beta-Alanine metabolism;ko00260//Glycine, serine and threonine metabolism;ko00350//Tyrosine metabolism;ko00360//Phenylalanine metabolism	K00276	-	-	-
TCONS_00051033	--	TCONS_00066073	LAT2	0.975838	3.46e-05	NC_040059.1	10124528	10137918	+	NC_040074.1	1185594	1202514	+	--	XP_005027404.1 PREDICTED: linker for activation of T-cells family member 2 isoform X3 [Anas platyrhynchos]	-	-	-	-	GO:0016020//membrane;GO:0098589//membrane region;GO:0043226//organelle;GO:0043227//membrane-bounded organelle;GO:0031982//vesicle;GO:0044425//membrane part;GO:0098805//whole membrane;GO:0031988//membrane-bounded vesicle	GO:0005515//protein binding;GO:0019904//protein domain specific binding;GO:0005488//binding	GO:0045321//leukocyte activation;GO:0044700//single organism signaling;GO:0002684//positive regulation of immune system process;GO:0002757//immune response-activating signal transduction;GO:0002253//activation of immune response;GO:0007166//cell surface receptor signaling pathway;GO:0002764//immune response-regulating signaling pathway;GO:0002429//immune response-activating cell surface receptor …
XR_002405640.2	--	TCONS_00066622	-	0.950056	0.000299895	NC_040060.1	17243343	17249038	+	NC_040075.1	13988560	14026395	+	--	XP_009069274.1 PREDICTED: brain-specific angiogenesis inhibitor 3-like, partial [Acanthisitta chloris]	-	-	-	-	-	-	-
XR_003500576.1	--	TCONS_00066622	-	0.957881	0.000180951	NC_040059.1	13234770	13245850	-	NC_040075.1	13988560	14026395	+	--	XP_009069274.1 PREDICTED: brain-specific angiogenesis inhibitor 3-like, partial [Acanthisitta chloris]	-	-	-	-	-	-	-
TCONS_00004331	--	TCONS_00066685	IL31RA	0.973425	4.6e-05	NC_040046.1	170855303	170879013	+	NC_040075.1	17453642	17489024	+	--	XP_013036064.1 PREDICTED: interleukin-31 receptor subunit alpha isoform X1 [Anser cygnoides domesticus]	-	-	-	-	-	-	-
XR_003493626.1	--	TCONS_00066685	IL31RA	0.968513	7.62e-05	NW_020865513.1	99511	127117	-	NC_040075.1	17453642	17489024	+	--	XP_013036064.1 PREDICTED: interleukin-31 receptor subunit alpha isoform X1 [Anser cygnoides domesticus]	-	-	-	-	-	-	-
TCONS_00011831	--	TCONS_00066866	FAM169A	0.966233	9.38e-05	NC_040047.1	57385662	57388153	+	NC_040075.1	24601060	24639675	+	--	XP_005011677.2 PREDICTED: soluble lamin-associated protein of 75 kDa [Anas platyrhynchos]	-	-	-	-	-	-	-
TCONS_00061153	--	TCONS_00066866	FAM169A	0.952174	0.000263764	NC_040067.1	4282222	4303667	+	NC_040075.1	24601060	24639675	+	--	XP_005011677.2 PREDICTED: soluble lamin-associated protein of 75 kDa [Anas platyrhynchos]	-	-	-	-	-	-	-
XR_001191758.3	--	TCONS_00066866	FAM169A	0.989232	3.1e-06	NC_040050.1	41581064	41582802	+	NC_040075.1	24601060	24639675	+	--	XP_005011677.2 PREDICTED: soluble lamin-associated protein of 75 kDa [Anas platyrhynchos]	-	-	-	-	-	-	-
XR_002404603.2	--	TCONS_00066866	FAM169A	0.951435	0.000276026	NW_020865824.1	26310	33485	-	NC_040075.1	24601060	24639675	+	--	XP_005011677.2 PREDICTED: soluble lamin-associated protein of 75 kDa [Anas platyrhynchos]	-	-	-	-	-	-	-
XR_003493505.1	--	TCONS_00066866	FAM169A	0.980718	1.77e-05	NW_020865371.1	131927	136331	+	NC_040075.1	24601060	24639675	+	--	XP_005011677.2 PREDICTED: soluble lamin-associated protein of 75 kDa [Anas platyrhynchos]	-	-	-	-	-	-	-
XR_003499478.1	--	TCONS_00066866	FAM169A	0.955886	0.000207581	NC_040055.1	15146170	15401948	-	NC_040075.1	24601060	24639675	+	--	XP_005011677.2 PREDICTED: soluble lamin-associated protein of 75 kDa [Anas platyrhynchos]	-	-	-	-	-	-	-
XR_003499788.1	--	TCONS_00066866	FAM169A	0.958002	0.000179406	NC_040046.1	1039275	1043184	-	NC_040075.1	24601060	24639675	+	--	XP_005011677.2 PREDICTED: soluble lamin-associated protein of 75 kDa [Anas platyrhynchos]	-	-	-	-	-	-	-
XR_216861.4	--	TCONS_00066866	FAM169A	0.960385	0.00015084	NC_040066.1	426128	429322	-	NC_040075.1	24601060	24639675	+	--	XP_005011677.2 PREDICTED: soluble lamin-associated protein of 75 kDa [Anas platyrhynchos]	-	-	-	-	-	-	-
TCONS_00005095	--	TCONS_00066925	VLDLR	0.977132	2.94e-05	NC_040046.1	2034524	2046909	-	NC_040075.1	26882587	26897876	+	--	AEM23934.1 very low density lipoprotein receptor transcript variant 1 [Anas platyrhynchos]	-	-	-	-	GO:0016020//membrane;GO:0031224//intrinsic component of membrane;GO:0044425//membrane part;GO:0043234//protein complex;GO:0044421//extracellular region part;GO:0032991//macromolecular complex;GO:0005576//extracellular region	GO:0005488//binding;GO:0004871//signal transducer activity;GO:0043167//ion binding;GO:0043169//cation binding;GO:0060089//molecular transducer activity;GO:0008565//protein transporter activity;GO:0005515//protein binding;GO:0038023//signaling receptor activity;GO:0030228//lipoprotein particle receptor activity;GO:0004872//receptor activity;GO:0099600//transmembrane receptor activity;GO:0004888//t…	GO:0042325//regulation of phosphorylation;GO:0051239//regulation of multicellular organismal process;GO:0048699//generation of neurons;GO:0032270//positive regulation of cellular protein metabolic process;GO:0021510//spinal cord development;GO:0097006//regulation of plasma lipoprotein particle levels;GO:0051234//establishment of localization;GO:0010975//regulation of neuron projection development…
XR_003497816.1	--	TCONS_00066925	VLDLR	0.953136	0.000248355	NC_040050.1	30895238	30900671	-	NC_040075.1	26882587	26897876	+	--	AEM23934.1 very low density lipoprotein receptor transcript variant 1 [Anas platyrhynchos]	-	-	-	-	GO:0016020//membrane;GO:0031224//intrinsic component of membrane;GO:0044425//membrane part;GO:0043234//protein complex;GO:0044421//extracellular region part;GO:0032991//macromolecular complex;GO:0005576//extracellular region	GO:0005488//binding;GO:0004871//signal transducer activity;GO:0043167//ion binding;GO:0043169//cation binding;GO:0060089//molecular transducer activity;GO:0008565//protein transporter activity;GO:0005515//protein binding;GO:0038023//signaling receptor activity;GO:0030228//lipoprotein particle receptor activity;GO:0004872//receptor activity;GO:0099600//transmembrane receptor activity;GO:0004888//t…	GO:0042325//regulation of phosphorylation;GO:0051239//regulation of multicellular organismal process;GO:0048699//generation of neurons;GO:0032270//positive regulation of cellular protein metabolic process;GO:0021510//spinal cord development;GO:0097006//regulation of plasma lipoprotein particle levels;GO:0051234//establishment of localization;GO:0010975//regulation of neuron projection development…
TCONS_00024716	--	TCONS_00066956	UHRF2	0.953781	0.000238349	NC_040049.1	42469061	42482288	+	NC_040075.1	28070450	28141991	+	--	XP_010017774.1 PREDICTED: E3 ubiquitin-protein ligase UHRF2 [Nestor notabilis]	-	-	-	-	GO:0043233//organelle lumen;GO:0005634//nucleus;GO:0032991//macromolecular complex;GO:0000785//chromatin;GO:0005622//intracellular;GO:0031974//membrane-enclosed lumen;GO:0043232//intracellular non-membrane-bounded organelle;GO:0044424//intracellular part;GO:0043226//organelle;GO:0070013//intracellular organelle lumen;GO:0044428//nuclear part;GO:0044454//nuclear chromosome part;GO:0044427//chromos…	GO:0046914//transition metal ion binding;GO:0043169//cation binding;GO:0043167//ion binding;GO:0005488//binding;GO:0046872//metal ion binding;GO:0005515//protein binding	GO:0044237//cellular metabolic process;GO:0044699//single-organism process;GO:0036211//protein modification process;GO:0044248//cellular catabolic process;GO:0032502//developmental process;GO:0044260//cellular macromolecule metabolic process;GO:0065007//biological regulation;GO:0044238//primary metabolic process;GO:0016567//protein ubiquitination;GO:0019941//modification-dependent protein catabol…
XR_002405640.2	--	TCONS_00067050	ACER2	0.967775	8.16e-05	NC_040060.1	17243343	17249038	+	NC_040075.1	33764021	33791274	+	--	XP_009889822.1 PREDICTED: alkaline ceramidase 2 [Charadrius vociferus]	Environmental Information Processing;Metabolism	Global and overview maps;Lipid metabolism;Signal transduction	ko01100//Metabolic pathways;ko04071//Sphingolipid signaling pathway;ko00600//Sphingolipid metabolism	K01441	-	-	-
XR_003492841.1	--	TCONS_00067050	ACER2	0.960827	0.000145898	NC_040075.1	67349384	67353659	+	NC_040075.1	33764021	33791274	+	--	XP_009889822.1 PREDICTED: alkaline ceramidase 2 [Charadrius vociferus]	Environmental Information Processing;Metabolism	Global and overview maps;Lipid metabolism;Signal transduction	ko01100//Metabolic pathways;ko04071//Sphingolipid signaling pathway;ko00600//Sphingolipid metabolism	K01441	-	-	-
XR_003500093.1	--	TCONS_00067050	ACER2	0.951198	0.000280041	NC_040057.1	12378042	12386253	-	NC_040075.1	33764021	33791274	+	--	XP_009889822.1 PREDICTED: alkaline ceramidase 2 [Charadrius vociferus]	Environmental Information Processing;Metabolism	Global and overview maps;Lipid metabolism;Signal transduction	ko01100//Metabolic pathways;ko04071//Sphingolipid signaling pathway;ko00600//Sphingolipid metabolism	K01441	-	-	-
XR_003496563.1	--	TCONS_00067197	GADD45G	0.977247	2.89e-05	NC_040048.1	84612738	84627643	-	NC_040075.1	44360248	44362474	+	--	XP_011576195.1 PREDICTED: growth arrest and DNA damage-inducible protein GADD45 gamma [Aquila chrysaetos canadensis]	Cellular Processes;Environmental Information Processing;Human Diseases	Signal transduction;Cancers;Cell growth and death	ko05200//Pathways in cancer;ko04010//MAPK signaling pathway;ko05202//Transcriptional misregulation in cancers;ko05225//Hepatocellular carcinoma;ko05226//Gastric cancer;ko04218//Cellular senescence;ko05224//Breast cancer;ko04210//Apoptosis;ko04068//FoxO signaling pathway;ko04110//Cell cycle;ko04064//NF-kappa B signaling pathway;ko05222//Small cell lung cancer;ko05210//Colorectal cancer;ko05214//Gl…	K04402	GO:0005623//cell;GO:0044424//intracellular part;GO:0043227//membrane-bounded organelle;GO:0043231//intracellular membrane-bounded organelle;GO:0043226//organelle;GO:0044464//cell part;GO:0043229//intracellular organelle;GO:0005622//intracellular	-	GO:0048518//positive regulation of biological process;GO:0009987//cellular process;GO:0043067//regulation of programmed cell death;GO:0010563//negative regulation of phosphorus metabolic process;GO:0045860//positive regulation of protein kinase activity;GO:0051338//regulation of transferase activity;GO:0019220//regulation of phosphate metabolic process;GO:0023056//positive regulation of signaling…
TCONS_00027847	--	TCONS_00067515	BDP1	0.952643	0.000256173	NC_040049.1	70309937	70330318	-	NC_040075.1	62949902	62994464	+	--	XP_012958673.1 PREDICTED: transcription factor TFIIIB component B'' homolog isoform X1 [Anas platyrhynchos]	-	-	-	-	-	-	-
XR_003492313.1	--	TCONS_00067515	BDP1	0.985569	7.43e-06	NC_040067.1	2551307	2563660	+	NC_040075.1	62949902	62994464	+	--	XP_012958673.1 PREDICTED: transcription factor TFIIIB component B'' homolog isoform X1 [Anas platyrhynchos]	-	-	-	-	-	-	-
XR_003500673.1	--	TCONS_00067515	BDP1	0.95331	0.000245624	NC_040060.1	6859412	7037567	-	NC_040075.1	62949902	62994464	+	--	XP_012958673.1 PREDICTED: transcription factor TFIIIB component B'' homolog isoform X1 [Anas platyrhynchos]	-	-	-	-	-	-	-
TCONS_00047824	--	TCONS_00067619	-	0.952464	0.000259055	NC_040057.1	8361864	8369307	+	NC_040075.1	68495204	68518077	+	--	KFW80458.1 Uncharacterized protein KIAA1958, partial [Manacus vitellinus]	-	-	-	-	-	-	-
XR_001188458.3	--	TCONS_00067619	-	0.959349	0.000162856	NC_040053.1	27257998	27264945	-	NC_040075.1	68495204	68518077	+	--	KFW80458.1 Uncharacterized protein KIAA1958, partial [Manacus vitellinus]	-	-	-	-	-	-	-
TCONS_00056684	--	TCONS_00067655	VCAN	0.992598	1.01e-06	NC_040064.1	1512138	1518330	+	NC_040075.1	71802832	71911975	+	--	XP_012948783.1 PREDICTED: LOW QUALITY PROTEIN: versican core protein [Anas platyrhynchos]	Environmental Information Processing	Signaling molecules and interaction	ko04514//Cell adhesion molecules (CAMs)	K06793	-	-	-
TCONS_00066354	--	TCONS_00067655	VCAN	0.995543	2.21e-07	NC_040075.1	86017	90236	+	NC_040075.1	71802832	71911975	+	--	XP_012948783.1 PREDICTED: LOW QUALITY PROTEIN: versican core protein [Anas platyrhynchos]	Environmental Information Processing	Signaling molecules and interaction	ko04514//Cell adhesion molecules (CAMs)	K06793	-	-	-
XR_001192252.3	--	TCONS_00067875	-	0.976741	3.09e-05	NC_040046.1	27989435	28007208	+	NC_040075.1	3138373	3164612	-	--	XP_009664440.1 PREDICTED: uncharacterized protein C18orf25 homolog isoform X2 [Struthio camelus australis]	-	-	-	-	-	-	-
XR_003495124.1	--	TCONS_00067875	-	0.958197	0.000176949	NC_040047.1	1128448	1158233	+	NC_040075.1	3138373	3164612	-	--	XP_009664440.1 PREDICTED: uncharacterized protein C18orf25 homolog isoform X2 [Struthio camelus australis]	-	-	-	-	-	-	-
XR_003497624.1	--	TCONS_00067875	-	0.992812	9.23e-07	NC_040050.1	10827043	10838465	+	NC_040075.1	3138373	3164612	-	--	XP_009664440.1 PREDICTED: uncharacterized protein C18orf25 homolog isoform X2 [Struthio camelus australis]	-	-	-	-	-	-	-
TCONS_00000285	--	TCONS_00067954	PIGO	0.972232	5.24e-05	NC_040046.1	8404934	8425213	+	NC_040075.1	9253413	9268502	-	--	XP_013055986.1 PREDICTED: LOW QUALITY PROTEIN: GPI ethanolamine phosphate transferase 3 [Anser cygnoides domesticus]	Metabolism	Global and overview maps;Glycan biosynthesis and metabolism	ko01100//Metabolic pathways;ko00563//Glycosylphosphatidylinositol(GPI)-anchor biosynthesis	K05288	-	-	-
TCONS_00014904	--	TCONS_00067954	PIGO	0.974402	4.11e-05	NC_040047.1	49147767	49281700	-	NC_040075.1	9253413	9268502	-	--	XP_013055986.1 PREDICTED: LOW QUALITY PROTEIN: GPI ethanolamine phosphate transferase 3 [Anser cygnoides domesticus]	Metabolism	Global and overview maps;Glycan biosynthesis and metabolism	ko01100//Metabolic pathways;ko00563//Glycosylphosphatidylinositol(GPI)-anchor biosynthesis	K05288	-	-	-
TCONS_00052324	--	TCONS_00067954	PIGO	0.963276	0.00012043	NC_040060.1	6448534	6455985	+	NC_040075.1	9253413	9268502	-	--	XP_013055986.1 PREDICTED: LOW QUALITY PROTEIN: GPI ethanolamine phosphate transferase 3 [Anser cygnoides domesticus]	Metabolism	Global and overview maps;Glycan biosynthesis and metabolism	ko01100//Metabolic pathways;ko00563//Glycosylphosphatidylinositol(GPI)-anchor biosynthesis	K05288	-	-	-
TCONS_00066773	--	TCONS_00067954	PIGO	0.955479	0.000213313	NC_040075.1	21782117	21795286	+	NC_040075.1	9253413	9268502	-	--	XP_013055986.1 PREDICTED: LOW QUALITY PROTEIN: GPI ethanolamine phosphate transferase 3 [Anser cygnoides domesticus]	Metabolism	Global and overview maps;Glycan biosynthesis and metabolism	ko01100//Metabolic pathways;ko00563//Glycosylphosphatidylinositol(GPI)-anchor biosynthesis	K05288	-	-	-
XR_003492935.1	--	TCONS_00067954	PIGO	0.963731	0.000116049	NC_040075.1	71153275	71158556	+	NC_040075.1	9253413	9268502	-	--	XP_013055986.1 PREDICTED: LOW QUALITY PROTEIN: GPI ethanolamine phosphate transferase 3 [Anser cygnoides domesticus]	Metabolism	Global and overview maps;Glycan biosynthesis and metabolism	ko01100//Metabolic pathways;ko00563//Glycosylphosphatidylinositol(GPI)-anchor biosynthesis	K05288	-	-	-
XR_003498107.1	--	TCONS_00067954	PIGO	0.963932	0.000114151	NC_040051.1	448811	457264	-	NC_040075.1	9253413	9268502	-	--	XP_013055986.1 PREDICTED: LOW QUALITY PROTEIN: GPI ethanolamine phosphate transferase 3 [Anser cygnoides domesticus]	Metabolism	Global and overview maps;Glycan biosynthesis and metabolism	ko01100//Metabolic pathways;ko00563//Glycosylphosphatidylinositol(GPI)-anchor biosynthesis	K05288	-	-	-
XR_003500049.1	--	TCONS_00067954	PIGO	0.968391	7.71e-05	NC_040057.1	4222351	4229255	+	NC_040075.1	9253413	9268502	-	--	XP_013055986.1 PREDICTED: LOW QUALITY PROTEIN: GPI ethanolamine phosphate transferase 3 [Anser cygnoides domesticus]	Metabolism	Global and overview maps;Glycan biosynthesis and metabolism	ko01100//Metabolic pathways;ko00563//Glycosylphosphatidylinositol(GPI)-anchor biosynthesis	K05288	-	-	-
XR_217813.4	--	TCONS_00067954	PIGO	0.950994	0.00028352	NC_040065.1	2545158	2563849	+	NC_040075.1	9253413	9268502	-	--	XP_013055986.1 PREDICTED: LOW QUALITY PROTEIN: GPI ethanolamine phosphate transferase 3 [Anser cygnoides domesticus]	Metabolism	Global and overview maps;Glycan biosynthesis and metabolism	ko01100//Metabolic pathways;ko00563//Glycosylphosphatidylinositol(GPI)-anchor biosynthesis	K05288	-	-	-
XR_002401822.2	--	TCONS_00067984	PDZD2	0.971486	5.67e-05	NC_040048.1	6291879	6362529	+	NC_040075.1	10031687	10144076	-	--	XP_013037101.1 PREDICTED: PDZ domain-containing protein 2 isoform X1 [Anser cygnoides domesticus]	-	-	-	-	-	-	-
XR_003496923.1	--	TCONS_00067984	PDZD2	0.973403	4.61e-05	NC_040049.1	14693551	14751336	-	NC_040075.1	10031687	10144076	-	--	XP_013037101.1 PREDICTED: PDZ domain-containing protein 2 isoform X1 [Anser cygnoides domesticus]	-	-	-	-	-	-	-
XR_003498444.1	--	TCONS_00067984	PDZD2	0.989721	2.69e-06	NC_040046.1	202009175	202011624	-	NC_040075.1	10031687	10144076	-	--	XP_013037101.1 PREDICTED: PDZ domain-containing protein 2 isoform X1 [Anser cygnoides domesticus]	-	-	-	-	-	-	-
XR_003492455.1	--	TCONS_00068083	LIFR	0.968036	7.97e-05	NC_040070.1	5800872	5804004	-	NC_040075.1	12588176	12647946	-	--	XP_012948483.1 PREDICTED: leukemia inhibitory factor receptor [Anas platyrhynchos]	Cellular Processes;Environmental Information Processing	Cellular community - eukaryotes;Signal transduction;Signaling molecules and interaction	ko04060//Cytokine-cytokine receptor interaction;ko04550//Signaling pathways regulating pluripotency of stem cells;ko04630//Jak-STAT signaling pathway	K05058	-	-	-
XR_001192142.3	--	TCONS_00069204	RASGRF2	0.975571	3.58e-05	NC_040046.1	96132613	96144344	+	NC_040075.1	70490938	70623652	-	--	XP_013047232.1 PREDICTED: ras-specific guanine nucleotide-releasing factor 2 [Anser cygnoides domesticus]	Environmental Information Processing	Signal transduction	ko04010//MAPK signaling pathway;ko04014//Ras signaling pathway	K12326	GO:0044464//cell part;GO:0005623//cell	-	GO:0051336//regulation of hydrolase activity;GO:0019222//regulation of metabolic process;GO:0050790//regulation of catalytic activity;GO:0010469//regulation of receptor activity;GO:0009966//regulation of signal transduction;GO:0065009//regulation of molecular function;GO:0010646//regulation of cell communication;GO:0065007//biological regulation;GO:0023051//regulation of signaling;GO:0050789//reg…
XR_003492841.1	--	TCONS_00069204	RASGRF2	0.966629	9.06e-05	NC_040075.1	67349384	67353659	+	NC_040075.1	70490938	70623652	-	--	XP_013047232.1 PREDICTED: ras-specific guanine nucleotide-releasing factor 2 [Anser cygnoides domesticus]	Environmental Information Processing	Signal transduction	ko04010//MAPK signaling pathway;ko04014//Ras signaling pathway	K12326	GO:0044464//cell part;GO:0005623//cell	-	GO:0051336//regulation of hydrolase activity;GO:0019222//regulation of metabolic process;GO:0050790//regulation of catalytic activity;GO:0010469//regulation of receptor activity;GO:0009966//regulation of signal transduction;GO:0065009//regulation of molecular function;GO:0010646//regulation of cell communication;GO:0065007//biological regulation;GO:0023051//regulation of signaling;GO:0050789//reg…
TCONS_00011835	--	TCONS_00070827	Ccdc81	0.981574	1.54e-05	NC_040047.1	57408380	57409820	+	NW_020865580.1	34144	41781	+	--	XP_013026376.1 PREDICTED: coiled-coil domain-containing protein 81-like [Anser cygnoides domesticus]	-	-	-	-	-	-	-
TCONS_00023688	--	TCONS_00070827	Ccdc81	0.955888	0.00020755	NC_040049.1	7070815	7074855	+	NW_020865580.1	34144	41781	+	--	XP_013026376.1 PREDICTED: coiled-coil domain-containing protein 81-like [Anser cygnoides domesticus]	-	-	-	-	-	-	-
TCONS_00023690	--	TCONS_00070827	Ccdc81	0.958698	0.000170731	NC_040049.1	7077553	7084395	+	NW_020865580.1	34144	41781	+	--	XP_013026376.1 PREDICTED: coiled-coil domain-containing protein 81-like [Anser cygnoides domesticus]	-	-	-	-	-	-	-
XR_001191758.3	--	TCONS_00070827	Ccdc81	0.960652	0.000147842	NC_040050.1	41581064	41582802	+	NW_020865580.1	34144	41781	+	--	XP_013026376.1 PREDICTED: coiled-coil domain-containing protein 81-like [Anser cygnoides domesticus]	-	-	-	-	-	-	-
XR_002402151.2	--	TCONS_00070827	Ccdc81	0.953155	0.000248056	NC_040047.1	126841725	126848791	-	NW_020865580.1	34144	41781	+	--	XP_013026376.1 PREDICTED: coiled-coil domain-containing protein 81-like [Anser cygnoides domesticus]	-	-	-	-	-	-	-
XR_002404149.2	--	TCONS_00070827	Ccdc81	0.98338	1.13e-05	NC_040049.1	75102297	75111170	+	NW_020865580.1	34144	41781	+	--	XP_013026376.1 PREDICTED: coiled-coil domain-containing protein 81-like [Anser cygnoides domesticus]	-	-	-	-	-	-	-
XR_002404603.2	--	TCONS_00070827	Ccdc81	0.958518	0.000172943	NW_020865824.1	26310	33485	-	NW_020865580.1	34144	41781	+	--	XP_013026376.1 PREDICTED: coiled-coil domain-containing protein 81-like [Anser cygnoides domesticus]	-	-	-	-	-	-	-
XR_003494933.1	--	TCONS_00070827	Ccdc81	0.983532	1.1e-05	NC_040046.1	122057549	122059719	+	NW_020865580.1	34144	41781	+	--	XP_013026376.1 PREDICTED: coiled-coil domain-containing protein 81-like [Anser cygnoides domesticus]	-	-	-	-	-	-	-
XR_003496543.1	--	TCONS_00070827	Ccdc81	0.975913	3.43e-05	NC_040048.1	81233801	81241482	+	NW_020865580.1	34144	41781	+	--	XP_013026376.1 PREDICTED: coiled-coil domain-containing protein 81-like [Anser cygnoides domesticus]	-	-	-	-	-	-	-
XR_003497509.1	--	TCONS_00070827	Ccdc81	0.992895	8.92e-07	NC_040050.1	61187374	61379338	-	NW_020865580.1	34144	41781	+	--	XP_013026376.1 PREDICTED: coiled-coil domain-containing protein 81-like [Anser cygnoides domesticus]	-	-	-	-	-	-	-
XR_003498432.1	--	TCONS_00070827	Ccdc81	0.950412	0.000293618	NC_040052.1	15282755	15317050	-	NW_020865580.1	34144	41781	+	--	XP_013026376.1 PREDICTED: coiled-coil domain-containing protein 81-like [Anser cygnoides domesticus]	-	-	-	-	-	-	-
XR_003498740.1	--	TCONS_00070827	Ccdc81	0.972827	4.91e-05	NC_040053.1	27267622	27367643	+	NW_020865580.1	34144	41781	+	--	XP_013026376.1 PREDICTED: coiled-coil domain-containing protein 81-like [Anser cygnoides domesticus]	-	-	-	-	-	-	-
XR_003501547.1	--	TCONS_00070827	Ccdc81	0.975504	3.61e-05	NC_040066.1	4470374	4504211	+	NW_020865580.1	34144	41781	+	--	XP_013026376.1 PREDICTED: coiled-coil domain-containing protein 81-like [Anser cygnoides domesticus]	-	-	-	-	-	-	-
XR_216861.4	--	TCONS_00070827	Ccdc81	0.950803	0.000286814	NC_040066.1	426128	429322	-	NW_020865580.1	34144	41781	+	--	XP_013026376.1 PREDICTED: coiled-coil domain-containing protein 81-like [Anser cygnoides domesticus]	-	-	-	-	-	-	-
XR_002398923.2	--	TCONS_00072024	RICTOR	0.952434	0.000259542	NC_040064.1	849539	901316	-	NW_020866261.1	115611	317972	-	--	KFP27721.1 Rapamycin-insensitive companion of mTOR, partial [Colius striatus]	Environmental Information Processing	Signal transduction	ko04150//mTOR signaling pathway	K08267	-	-	-
XR_003499788.1	--	TCONS_00072024	RICTOR	0.97382	4.4e-05	NC_040046.1	1039275	1043184	-	NW_020866261.1	115611	317972	-	--	KFP27721.1 Rapamycin-insensitive companion of mTOR, partial [Colius striatus]	Environmental Information Processing	Signal transduction	ko04150//mTOR signaling pathway	K08267	-	-	-
TCONS_00039315	--	TCONS_00072384	UBAP2	-0.963949	0.000113993	NC_040053.1	26165054	26229011	+	NW_020866439.1	5070	33535	-	--	XP_013051003.1 PREDICTED: ubiquitin-associated protein 2 isoform X2 [Anser cygnoides domesticus]	-	-	-	-	-	-	-
TCONS_00013863	--	TCONS_00072543	ABI3BP	0.950676	0.000289006	NC_040047.1	8063750	8071725	-	NW_020866515.1	37827	112742	-	--	XP_015152409.1 PREDICTED: target of Nesh-SH3 isoform X1 [Gallus gallus]	-	-	-	-	-	-	-
TCONS_00004494	--	TCONS_00073597	MIER3	0.957672	0.000183626	NC_040046.1	179430640	179461496	+	NW_020866986.1	8564	34569	-	--	XP_013036029.1 PREDICTED: mesoderm induction early response protein 3 isoform X3 [Anser cygnoides domesticus]	-	-	-	-	GO:0044464//cell part;GO:0043227//membrane-bounded organelle;GO:0044424//intracellular part;GO:0005622//intracellular;GO:0005623//cell;GO:0043226//organelle;GO:0043229//intracellular organelle;GO:0043231//intracellular membrane-bounded organelle	GO:0005488//binding	-
TCONS_00011831	--	TCONS_00073597	MIER3	0.959724	0.00015844	NC_040047.1	57385662	57388153	+	NW_020866986.1	8564	34569	-	--	XP_013036029.1 PREDICTED: mesoderm induction early response protein 3 isoform X3 [Anser cygnoides domesticus]	-	-	-	-	GO:0044464//cell part;GO:0043227//membrane-bounded organelle;GO:0044424//intracellular part;GO:0005622//intracellular;GO:0005623//cell;GO:0043226//organelle;GO:0043229//intracellular organelle;GO:0043231//intracellular membrane-bounded organelle	GO:0005488//binding	-
XR_003492395.1	--	TCONS_00073597	MIER3	0.968313	7.77e-05	NC_040046.1	56582983	56588056	+	NW_020866986.1	8564	34569	-	--	XP_013036029.1 PREDICTED: mesoderm induction early response protein 3 isoform X3 [Anser cygnoides domesticus]	-	-	-	-	GO:0044464//cell part;GO:0043227//membrane-bounded organelle;GO:0044424//intracellular part;GO:0005622//intracellular;GO:0005623//cell;GO:0043226//organelle;GO:0043229//intracellular organelle;GO:0043231//intracellular membrane-bounded organelle	GO:0005488//binding	-
XR_003496344.1	--	TCONS_00073597	MIER3	0.96827	7.8e-05	NC_040048.1	40261803	40355065	-	NW_020866986.1	8564	34569	-	--	XP_013036029.1 PREDICTED: mesoderm induction early response protein 3 isoform X3 [Anser cygnoides domesticus]	-	-	-	-	GO:0044464//cell part;GO:0043227//membrane-bounded organelle;GO:0044424//intracellular part;GO:0005622//intracellular;GO:0005623//cell;GO:0043226//organelle;GO:0043229//intracellular organelle;GO:0043231//intracellular membrane-bounded organelle	GO:0005488//binding	-
XR_003495427.1	--	TCONS_00073601	MIER3	0.956145	0.000203992	NC_040047.1	68314617	68321553	+	NW_020866986.1	8564	35223	-	--	XP_013036029.1 PREDICTED: mesoderm induction early response protein 3 isoform X3 [Anser cygnoides domesticus]	-	-	-	-	GO:0044464//cell part;GO:0043226//organelle;GO:0005623//cell;GO:0043229//intracellular organelle;GO:0044424//intracellular part;GO:0043231//intracellular membrane-bounded organelle;GO:0005622//intracellular;GO:0043227//membrane-bounded organelle	GO:0005488//binding	-
XR_003500555.1	--	TCONS_00073601	MIER3	0.952222	0.000262978	NC_040059.1	4670992	4692910	+	NW_020866986.1	8564	35223	-	--	XP_013036029.1 PREDICTED: mesoderm induction early response protein 3 isoform X3 [Anser cygnoides domesticus]	-	-	-	-	GO:0044464//cell part;GO:0043226//organelle;GO:0005623//cell;GO:0043229//intracellular organelle;GO:0044424//intracellular part;GO:0043231//intracellular membrane-bounded organelle;GO:0005622//intracellular;GO:0043227//membrane-bounded organelle	GO:0005488//binding	-
XR_002402406.2	--	XM_005008890.4	ZC3H12D	0.968094	7.93e-05	NC_040057.1	12393420	12406316	-	NC_040048.1	50611292	50624676	-	--	PREDICTED: LOW QUALITY PROTEIN: probable ribonuclease ZC3H12D [Anas platyrhynchos]	-	-	-	-	-	GO:0005488//binding;GO:0043169//cation binding;GO:0043167//ion binding	GO:0044699//single-organism process;GO:0000278//mitotic cell cycle;GO:0022402//cell cycle process;GO:0044843//cell cycle G1/S phase transition;GO:0044770//cell cycle phase transition;GO:0000082//G1/S transition of mitotic cell cycle;GO:0044763//single-organism cellular process;GO:1903047//mitotic cell cycle process;GO:0044772//mitotic cell cycle phase transition;GO:0007049//cell cycle;GO:0009987/…
XR_003496563.1	--	XM_005008890.4	ZC3H12D	0.976308	3.27e-05	NC_040048.1	84612738	84627643	-	NC_040048.1	50611292	50624676	-	--	PREDICTED: LOW QUALITY PROTEIN: probable ribonuclease ZC3H12D [Anas platyrhynchos]	-	-	-	-	-	GO:0005488//binding;GO:0043169//cation binding;GO:0043167//ion binding	GO:0044699//single-organism process;GO:0000278//mitotic cell cycle;GO:0022402//cell cycle process;GO:0044843//cell cycle G1/S phase transition;GO:0044770//cell cycle phase transition;GO:0000082//G1/S transition of mitotic cell cycle;GO:0044763//single-organism cellular process;GO:1903047//mitotic cell cycle process;GO:0044772//mitotic cell cycle phase transition;GO:0007049//cell cycle;GO:0009987/…
XR_001190174.3	--	XM_005008899.4	IYD	0.954731	0.000224126	NC_040050.1	57161753	57238119	-	NC_040048.1	50930622	50947553	+	--	PREDICTED: iodotyrosine dehalogenase 1 isoform X1 [Anas platyrhynchos]	-	-	-	-	-	GO:0003824//catalytic activity	GO:0044699//single-organism process;GO:0044710//single-organism metabolic process;GO:0008152//metabolic process
XR_003492471.1	--	XM_005008899.4	IYD	0.966338	9.3e-05	NC_040070.1	5689370	5692142	-	NC_040048.1	50930622	50947553	+	--	PREDICTED: iodotyrosine dehalogenase 1 isoform X1 [Anas platyrhynchos]	-	-	-	-	-	GO:0003824//catalytic activity	GO:0044699//single-organism process;GO:0044710//single-organism metabolic process;GO:0008152//metabolic process
XR_003492889.1	--	XM_005008899.4	IYD	0.975454	3.63e-05	NC_040075.1	23733618	23740832	+	NC_040048.1	50930622	50947553	+	--	PREDICTED: iodotyrosine dehalogenase 1 isoform X1 [Anas platyrhynchos]	-	-	-	-	-	GO:0003824//catalytic activity	GO:0044699//single-organism process;GO:0044710//single-organism metabolic process;GO:0008152//metabolic process
TCONS_00004858	--	XM_005009574.4	ENPP3	0.962352	0.000129667	NC_040046.1	199358186	199366892	+	NC_040048.1	60323287	60365726	-	--	PREDICTED: ectonucleotide pyrophosphatase/phosphodiesterase family member 3 [Anas platyrhynchos]	Metabolism	Carbohydrate metabolism;Nucleotide metabolism;Global and overview maps;Metabolism of cofactors and vitamins	ko01100//Metabolic pathways;ko00230//Purine metabolism;ko00240//Pyrimidine metabolism;ko00500//Starch and sucrose metabolism;ko00760//Nicotinate and nicotinamide metabolism;ko00770//Pantothenate and CoA biosynthesis;ko00740//Riboflavin metabolism	K01513	GO:0031988//membrane-bounded vesicle;GO:0044464//cell part;GO:0005737//cytoplasm;GO:0044424//intracellular part;GO:0031982//vesicle;GO:0043226//organelle;GO:0005622//intracellular;GO:0044444//cytoplasmic part;GO:0005623//cell;GO:0043227//membrane-bounded organelle	GO:0001871//pattern binding;GO:0004527//exonuclease activity;GO:0043167//ion binding;GO:0016817//hydrolase activity, acting on acid anhydrides;GO:0016788//hydrolase activity, acting on ester bonds;GO:0005488//binding;GO:0038024//cargo receptor activity;GO:0016787//hydrolase activity;GO:0004518//nuclease activity;GO:0043169//cation binding;GO:0016818//hydrolase activity, acting on acid anhydrides,…	GO:0043170//macromolecule metabolic process;GO:0071704//organic substance metabolic process;GO:0044281//small molecule metabolic process;GO:0009141//nucleoside triphosphate metabolic process;GO:0006753//nucleoside phosphate metabolic process;GO:0044238//primary metabolic process;GO:0051234//establishment of localization;GO:0055086//nucleobase-containing small molecule metabolic process;GO:0002376…
XR_003493165.1	--	XM_005009574.4	ENPP3	0.958851	0.000168853	NC_040075.1	45717924	45724767	+	NC_040048.1	60323287	60365726	-	--	PREDICTED: ectonucleotide pyrophosphatase/phosphodiesterase family member 3 [Anas platyrhynchos]	Metabolism	Carbohydrate metabolism;Nucleotide metabolism;Global and overview maps;Metabolism of cofactors and vitamins	ko01100//Metabolic pathways;ko00230//Purine metabolism;ko00240//Pyrimidine metabolism;ko00500//Starch and sucrose metabolism;ko00760//Nicotinate and nicotinamide metabolism;ko00770//Pantothenate and CoA biosynthesis;ko00740//Riboflavin metabolism	K01513	GO:0031988//membrane-bounded vesicle;GO:0044464//cell part;GO:0005737//cytoplasm;GO:0044424//intracellular part;GO:0031982//vesicle;GO:0043226//organelle;GO:0005622//intracellular;GO:0044444//cytoplasmic part;GO:0005623//cell;GO:0043227//membrane-bounded organelle	GO:0001871//pattern binding;GO:0004527//exonuclease activity;GO:0043167//ion binding;GO:0016817//hydrolase activity, acting on acid anhydrides;GO:0016788//hydrolase activity, acting on ester bonds;GO:0005488//binding;GO:0038024//cargo receptor activity;GO:0016787//hydrolase activity;GO:0004518//nuclease activity;GO:0043169//cation binding;GO:0016818//hydrolase activity, acting on acid anhydrides,…	GO:0043170//macromolecule metabolic process;GO:0071704//organic substance metabolic process;GO:0044281//small molecule metabolic process;GO:0009141//nucleoside triphosphate metabolic process;GO:0006753//nucleoside phosphate metabolic process;GO:0044238//primary metabolic process;GO:0051234//establishment of localization;GO:0055086//nucleobase-containing small molecule metabolic process;GO:0002376…
XR_003493925.1	--	XM_005009581.4	TMEM200A	0.982836	1.25e-05	NW_020865859.1	109561	113812	+	NC_040048.1	60890313	60895384	-	--	PREDICTED: transmembrane protein 200A [Anas platyrhynchos]	-	-	-	-	-	-	-
XR_003498498.1	--	XM_005009581.4	TMEM200A	0.952245	0.00026261	NC_040052.1	13487833	13504177	+	NC_040048.1	60890313	60895384	-	--	PREDICTED: transmembrane protein 200A [Anas platyrhynchos]	-	-	-	-	-	-	-
XR_003500183.1	--	XM_005009581.4	TMEM200A	0.993146	8.01e-07	NC_040046.1	8404934	8425213	+	NC_040048.1	60890313	60895384	-	--	PREDICTED: transmembrane protein 200A [Anas platyrhynchos]	-	-	-	-	-	-	-
TCONS_00010931	--	XM_005009775.4	SCG5	0.971731	5.53e-05	NC_040047.1	17731585	17744250	+	NC_040050.1	43939272	43967859	-	--	PREDICTED: neuroendocrine protein 7B2 isoform X1 [Anas platyrhynchos]	-	-	-	-	GO:0012505//endomembrane system;GO:0005623//cell;GO:0044464//cell part	GO:0005515//protein binding;GO:0005488//binding	GO:0071702//organic substance transport;GO:0019538//protein metabolic process;GO:0007154//cell communication;GO:0071704//organic substance metabolic process;GO:0044238//primary metabolic process;GO:0007186//G-protein coupled receptor signaling pathway;GO:0051234//establishment of localization;GO:0023052//signaling;GO:0033036//macromolecule localization;GO:0044699//single-organism process;GO:00650…
TCONS_00026124	--	XM_005009775.4	SCG5	0.958044	0.000178881	NC_040049.1	12250235	12283307	-	NC_040050.1	43939272	43967859	-	--	PREDICTED: neuroendocrine protein 7B2 isoform X1 [Anas platyrhynchos]	-	-	-	-	GO:0012505//endomembrane system;GO:0005623//cell;GO:0044464//cell part	GO:0005515//protein binding;GO:0005488//binding	GO:0071702//organic substance transport;GO:0019538//protein metabolic process;GO:0007154//cell communication;GO:0071704//organic substance metabolic process;GO:0044238//primary metabolic process;GO:0007186//G-protein coupled receptor signaling pathway;GO:0051234//establishment of localization;GO:0023052//signaling;GO:0033036//macromolecule localization;GO:0044699//single-organism process;GO:00650…
XR_003492400.1	--	XM_005009992.4	--	-0.951106	0.000281615	NC_040069.1	1306246	1309200	-	NC_040059.1	13413857	13418624	-	--	PREDICTED: toll-like receptor 2 [Anser cygnoides domesticus]	-	-	-	-	GO:0044425//membrane part;GO:0031982//vesicle;GO:0098805//whole membrane;GO:0043227//membrane-bounded organelle;GO:0098589//membrane region;GO:0005576//extracellular region;GO:0016020//membrane;GO:0031988//membrane-bounded vesicle;GO:0043226//organelle;GO:0044421//extracellular region part	GO:0005488//binding;GO:0097367//carbohydrate derivative binding	GO:0065007//biological regulation;GO:0032680//regulation of tumor necrosis factor production;GO:1901700//response to oxygen-containing compound;GO:0050794//regulation of cellular process;GO:0042221//response to chemical;GO:0070391//response to lipoteichoic acid;GO:0001817//regulation of cytokine production;GO:0009607//response to biotic stimulus;GO:0002237//response to molecule of bacterial origi…
XR_003493494.1	--	XM_005009992.4	--	0.953494	0.000242769	NW_020865354.1	139234	142453	+	NC_040059.1	13413857	13418624	-	--	PREDICTED: toll-like receptor 2 [Anser cygnoides domesticus]	-	-	-	-	GO:0044425//membrane part;GO:0031982//vesicle;GO:0098805//whole membrane;GO:0043227//membrane-bounded organelle;GO:0098589//membrane region;GO:0005576//extracellular region;GO:0016020//membrane;GO:0031988//membrane-bounded vesicle;GO:0043226//organelle;GO:0044421//extracellular region part	GO:0005488//binding;GO:0097367//carbohydrate derivative binding	GO:0065007//biological regulation;GO:0032680//regulation of tumor necrosis factor production;GO:1901700//response to oxygen-containing compound;GO:0050794//regulation of cellular process;GO:0042221//response to chemical;GO:0070391//response to lipoteichoic acid;GO:0001817//regulation of cytokine production;GO:0009607//response to biotic stimulus;GO:0002237//response to molecule of bacterial origi…
XR_003500093.1	--	XM_005009992.4	--	-0.960756	0.000146684	NC_040057.1	12378042	12386253	-	NC_040059.1	13413857	13418624	-	--	PREDICTED: toll-like receptor 2 [Anser cygnoides domesticus]	-	-	-	-	GO:0044425//membrane part;GO:0031982//vesicle;GO:0098805//whole membrane;GO:0043227//membrane-bounded organelle;GO:0098589//membrane region;GO:0005576//extracellular region;GO:0016020//membrane;GO:0031988//membrane-bounded vesicle;GO:0043226//organelle;GO:0044421//extracellular region part	GO:0005488//binding;GO:0097367//carbohydrate derivative binding	GO:0065007//biological regulation;GO:0032680//regulation of tumor necrosis factor production;GO:1901700//response to oxygen-containing compound;GO:0050794//regulation of cellular process;GO:0042221//response to chemical;GO:0070391//response to lipoteichoic acid;GO:0001817//regulation of cytokine production;GO:0009607//response to biotic stimulus;GO:0002237//response to molecule of bacterial origi…
TCONS_00033528	--	XM_005010199.4	SNAI2	0.993878	5.71e-07	NC_040051.1	25689118	25698460	+	NC_040047.1	110221534	110225151	+	--	PREDICTED: zinc finger protein SNAI2 [Taeniopygia guttata]	Environmental Information Processing;Cellular Processes	Cellular community - eukaryotes;Signal transduction	ko04390//Hippo signaling pathway;ko04520//Adherens junction	K05706	GO:0043227//membrane-bounded organelle;GO:0043229//intracellular organelle;GO:0044422//organelle part;GO:0043231//intracellular membrane-bounded organelle;GO:0044424//intracellular part;GO:0043232//intracellular non-membrane-bounded organelle;GO:0005622//intracellular;GO:0005694//chromosome;GO:0044464//cell part;GO:0032991//macromolecular complex;GO:0044446//intracellular organelle part;GO:000562…	GO:1901363//heterocyclic compound binding;GO:0005515//protein binding;GO:0001071//nucleic acid binding transcription factor activity;GO:0003677//DNA binding;GO:0097159//organic cyclic compound binding;GO:0043169//cation binding;GO:0005488//binding;GO:0043167//ion binding;GO:0003676//nucleic acid binding;GO:0000981//RNA polymerase II transcription factor activity, sequence-specific DNA binding;GO:…	GO:0050793//regulation of developmental process;GO:0097191//extrinsic apoptotic signaling pathway;GO:0051055//negative regulation of lipid biosynthetic process;GO:0010033//response to organic substance;GO:0031399//regulation of protein modification process;GO:0097190//apoptotic signaling pathway;GO:0019218//regulation of steroid metabolic process;GO:0019216//regulation of lipid metabolic process;…
XR_001192252.3	--	XM_005010199.4	SNAI2	0.967811	8.14e-05	NC_040046.1	27989435	28007208	+	NC_040047.1	110221534	110225151	+	--	PREDICTED: zinc finger protein SNAI2 [Taeniopygia guttata]	Environmental Information Processing;Cellular Processes	Cellular community - eukaryotes;Signal transduction	ko04390//Hippo signaling pathway;ko04520//Adherens junction	K05706	GO:0043227//membrane-bounded organelle;GO:0043229//intracellular organelle;GO:0044422//organelle part;GO:0043231//intracellular membrane-bounded organelle;GO:0044424//intracellular part;GO:0043232//intracellular non-membrane-bounded organelle;GO:0005622//intracellular;GO:0005694//chromosome;GO:0044464//cell part;GO:0032991//macromolecular complex;GO:0044446//intracellular organelle part;GO:000562…	GO:1901363//heterocyclic compound binding;GO:0005515//protein binding;GO:0001071//nucleic acid binding transcription factor activity;GO:0003677//DNA binding;GO:0097159//organic cyclic compound binding;GO:0043169//cation binding;GO:0005488//binding;GO:0043167//ion binding;GO:0003676//nucleic acid binding;GO:0000981//RNA polymerase II transcription factor activity, sequence-specific DNA binding;GO:…	GO:0050793//regulation of developmental process;GO:0097191//extrinsic apoptotic signaling pathway;GO:0051055//negative regulation of lipid biosynthetic process;GO:0010033//response to organic substance;GO:0031399//regulation of protein modification process;GO:0097190//apoptotic signaling pathway;GO:0019218//regulation of steroid metabolic process;GO:0019216//regulation of lipid metabolic process;…
XR_001194425.3	--	XM_005010199.4	SNAI2	0.962255	0.000130658	NC_040060.1	17207203	17319182	+	NC_040047.1	110221534	110225151	+	--	PREDICTED: zinc finger protein SNAI2 [Taeniopygia guttata]	Environmental Information Processing;Cellular Processes	Cellular community - eukaryotes;Signal transduction	ko04390//Hippo signaling pathway;ko04520//Adherens junction	K05706	GO:0043227//membrane-bounded organelle;GO:0043229//intracellular organelle;GO:0044422//organelle part;GO:0043231//intracellular membrane-bounded organelle;GO:0044424//intracellular part;GO:0043232//intracellular non-membrane-bounded organelle;GO:0005622//intracellular;GO:0005694//chromosome;GO:0044464//cell part;GO:0032991//macromolecular complex;GO:0044446//intracellular organelle part;GO:000562…	GO:1901363//heterocyclic compound binding;GO:0005515//protein binding;GO:0001071//nucleic acid binding transcription factor activity;GO:0003677//DNA binding;GO:0097159//organic cyclic compound binding;GO:0043169//cation binding;GO:0005488//binding;GO:0043167//ion binding;GO:0003676//nucleic acid binding;GO:0000981//RNA polymerase II transcription factor activity, sequence-specific DNA binding;GO:…	GO:0050793//regulation of developmental process;GO:0097191//extrinsic apoptotic signaling pathway;GO:0051055//negative regulation of lipid biosynthetic process;GO:0010033//response to organic substance;GO:0031399//regulation of protein modification process;GO:0097190//apoptotic signaling pathway;GO:0019218//regulation of steroid metabolic process;GO:0019216//regulation of lipid metabolic process;…
XR_002402267.2	--	XM_005010199.4	SNAI2	0.95383	0.000237611	NC_040050.1	32405063	32422454	+	NC_040047.1	110221534	110225151	+	--	PREDICTED: zinc finger protein SNAI2 [Taeniopygia guttata]	Environmental Information Processing;Cellular Processes	Cellular community - eukaryotes;Signal transduction	ko04390//Hippo signaling pathway;ko04520//Adherens junction	K05706	GO:0043227//membrane-bounded organelle;GO:0043229//intracellular organelle;GO:0044422//organelle part;GO:0043231//intracellular membrane-bounded organelle;GO:0044424//intracellular part;GO:0043232//intracellular non-membrane-bounded organelle;GO:0005622//intracellular;GO:0005694//chromosome;GO:0044464//cell part;GO:0032991//macromolecular complex;GO:0044446//intracellular organelle part;GO:000562…	GO:1901363//heterocyclic compound binding;GO:0005515//protein binding;GO:0001071//nucleic acid binding transcription factor activity;GO:0003677//DNA binding;GO:0097159//organic cyclic compound binding;GO:0043169//cation binding;GO:0005488//binding;GO:0043167//ion binding;GO:0003676//nucleic acid binding;GO:0000981//RNA polymerase II transcription factor activity, sequence-specific DNA binding;GO:…	GO:0050793//regulation of developmental process;GO:0097191//extrinsic apoptotic signaling pathway;GO:0051055//negative regulation of lipid biosynthetic process;GO:0010033//response to organic substance;GO:0031399//regulation of protein modification process;GO:0097190//apoptotic signaling pathway;GO:0019218//regulation of steroid metabolic process;GO:0019216//regulation of lipid metabolic process;…
XR_003497624.1	--	XM_005010199.4	SNAI2	0.96902	7.26e-05	NC_040050.1	10827043	10838465	+	NC_040047.1	110221534	110225151	+	--	PREDICTED: zinc finger protein SNAI2 [Taeniopygia guttata]	Environmental Information Processing;Cellular Processes	Cellular community - eukaryotes;Signal transduction	ko04390//Hippo signaling pathway;ko04520//Adherens junction	K05706	GO:0043227//membrane-bounded organelle;GO:0043229//intracellular organelle;GO:0044422//organelle part;GO:0043231//intracellular membrane-bounded organelle;GO:0044424//intracellular part;GO:0043232//intracellular non-membrane-bounded organelle;GO:0005622//intracellular;GO:0005694//chromosome;GO:0044464//cell part;GO:0032991//macromolecular complex;GO:0044446//intracellular organelle part;GO:000562…	GO:1901363//heterocyclic compound binding;GO:0005515//protein binding;GO:0001071//nucleic acid binding transcription factor activity;GO:0003677//DNA binding;GO:0097159//organic cyclic compound binding;GO:0043169//cation binding;GO:0005488//binding;GO:0043167//ion binding;GO:0003676//nucleic acid binding;GO:0000981//RNA polymerase II transcription factor activity, sequence-specific DNA binding;GO:…	GO:0050793//regulation of developmental process;GO:0097191//extrinsic apoptotic signaling pathway;GO:0051055//negative regulation of lipid biosynthetic process;GO:0010033//response to organic substance;GO:0031399//regulation of protein modification process;GO:0097190//apoptotic signaling pathway;GO:0019218//regulation of steroid metabolic process;GO:0019216//regulation of lipid metabolic process;…
XR_003492943.1	--	XM_005010200.4	PPDPFL	0.961401	0.000139644	NC_040075.1	63185899	63189487	+	NC_040047.1	110157579	110160529	-	--	PREDICTED: pancreatic progenitor cell differentiation and proliferation factor-like protein [Anas platyrhynchos]	-	-	-	-	-	-	GO:0032502//developmental process;GO:0044699//single-organism process;GO:0044763//single-organism cellular process;GO:0048869//cellular developmental process;GO:0009987//cellular process;GO:0044767//single-organism developmental process
TCONS_00044239	--	XM_005010406.4	pmepa1	-0.96002	0.00015501	NC_040055.1	14408228	14499956	+	NC_040066.1	10191132	10198554	-	--	Transmembrane prostate androgen-induced protein, partial [Anas platyrhynchos]	-	-	-	-	-	-	-
XR_003492889.1	--	XM_005010406.4	pmepa1	-0.950432	0.000293263	NC_040075.1	23733618	23740832	+	NC_040066.1	10191132	10198554	-	--	Transmembrane prostate androgen-induced protein, partial [Anas platyrhynchos]	-	-	-	-	-	-	-
TCONS_00048908	--	XM_005011063.4	Slc35e2	0.963379	0.000119431	NC_040058.1	339960	346502	+	NC_040067.1	8239869	8253545	+	--	PREDICTED: solute carrier family 35 member E2 [Anas platyrhynchos]	-	-	-	-	GO:0031224//intrinsic component of membrane;GO:0016020//membrane;GO:0044425//membrane part	-	-
XR_217450.4	--	XM_005011963.4	D10Jhu81e	0.977214	2.91e-05	NC_040063.1	2714704	2717526	-	NC_040049.1	10046496	10049784	+	--	PREDICTED: ES1 protein homolog, mitochondrial [Anas platyrhynchos]	-	-	-	-	-	-	-
XR_001192142.3	--	XM_005012176.4	APOLD1	0.959484	0.000161264	NC_040046.1	96132613	96144344	+	NC_040046.1	159284523	159288891	+	--	PREDICTED: apolipoprotein L domain-containing protein 1 [Anas platyrhynchos]	Human Diseases	Infectious diseases	ko05143//African trypanosomiasis	K14480	-	GO:0005488//binding	GO:0044238//primary metabolic process;GO:0051234//establishment of localization;GO:0043170//macromolecule metabolic process;GO:0044699//single-organism process;GO:0008152//metabolic process;GO:0051179//localization;GO:1902578//single-organism localization;GO:0044765//single-organism transport;GO:0071704//organic substance metabolic process;GO:0019538//protein metabolic process;GO:0006810//transpo…
TCONS_00014972	--	XM_005012209.4	CYP2D20	0.982404	1.34e-05	NC_040047.1	51236897	51241731	-	NC_040046.1	160505477	160514444	+	--	PREDICTED: cytochrome P450 2D17 isoform X1 [Anas platyrhynchos]	Organismal Systems;Metabolism	Nervous system;Lipid metabolism	ko04726//Serotonergic synapse;ko00140//Steroid hormone biosynthesis	K07414	-	GO:0003824//catalytic activity;GO:0043167//ion binding;GO:0043169//cation binding;GO:0046906//tetrapyrrole binding;GO:1901363//heterocyclic compound binding;GO:0097159//organic cyclic compound binding;GO:0016491//oxidoreductase activity;GO:0046872//metal ion binding;GO:0004497//monooxygenase activity;GO:0005488//binding;GO:0046914//transition metal ion binding	GO:0008152//metabolic process;GO:0044699//single-organism process;GO:0044710//single-organism metabolic process
TCONS_00016179	--	XM_005012209.4	CYP2D20	0.95072	0.000288242	NC_040047.1	110241725	110303752	-	NC_040046.1	160505477	160514444	+	--	PREDICTED: cytochrome P450 2D17 isoform X1 [Anas platyrhynchos]	Organismal Systems;Metabolism	Nervous system;Lipid metabolism	ko04726//Serotonergic synapse;ko00140//Steroid hormone biosynthesis	K07414	-	GO:0003824//catalytic activity;GO:0043167//ion binding;GO:0043169//cation binding;GO:0046906//tetrapyrrole binding;GO:1901363//heterocyclic compound binding;GO:0097159//organic cyclic compound binding;GO:0016491//oxidoreductase activity;GO:0046872//metal ion binding;GO:0004497//monooxygenase activity;GO:0005488//binding;GO:0046914//transition metal ion binding	GO:0008152//metabolic process;GO:0044699//single-organism process;GO:0044710//single-organism metabolic process
TCONS_00016553	--	XM_005012209.4	CYP2D20	0.97871	2.37e-05	NC_040047.1	126719400	126724488	-	NC_040046.1	160505477	160514444	+	--	PREDICTED: cytochrome P450 2D17 isoform X1 [Anas platyrhynchos]	Organismal Systems;Metabolism	Nervous system;Lipid metabolism	ko04726//Serotonergic synapse;ko00140//Steroid hormone biosynthesis	K07414	-	GO:0003824//catalytic activity;GO:0043167//ion binding;GO:0043169//cation binding;GO:0046906//tetrapyrrole binding;GO:1901363//heterocyclic compound binding;GO:0097159//organic cyclic compound binding;GO:0016491//oxidoreductase activity;GO:0046872//metal ion binding;GO:0004497//monooxygenase activity;GO:0005488//binding;GO:0046914//transition metal ion binding	GO:0008152//metabolic process;GO:0044699//single-organism process;GO:0044710//single-organism metabolic process
XR_003496285.1	--	XM_005012209.4	CYP2D20	0.964842	0.000105804	NC_040048.1	38866531	39280193	-	NC_040046.1	160505477	160514444	+	--	PREDICTED: cytochrome P450 2D17 isoform X1 [Anas platyrhynchos]	Organismal Systems;Metabolism	Nervous system;Lipid metabolism	ko04726//Serotonergic synapse;ko00140//Steroid hormone biosynthesis	K07414	-	GO:0003824//catalytic activity;GO:0043167//ion binding;GO:0043169//cation binding;GO:0046906//tetrapyrrole binding;GO:1901363//heterocyclic compound binding;GO:0097159//organic cyclic compound binding;GO:0016491//oxidoreductase activity;GO:0046872//metal ion binding;GO:0004497//monooxygenase activity;GO:0005488//binding;GO:0046914//transition metal ion binding	GO:0008152//metabolic process;GO:0044699//single-organism process;GO:0044710//single-organism metabolic process
XR_003499027.1	--	XM_005012209.4	CYP2D20	0.962862	0.00012451	NC_040054.1	25793029	25803278	+	NC_040046.1	160505477	160514444	+	--	PREDICTED: cytochrome P450 2D17 isoform X1 [Anas platyrhynchos]	Organismal Systems;Metabolism	Nervous system;Lipid metabolism	ko04726//Serotonergic synapse;ko00140//Steroid hormone biosynthesis	K07414	-	GO:0003824//catalytic activity;GO:0043167//ion binding;GO:0043169//cation binding;GO:0046906//tetrapyrrole binding;GO:1901363//heterocyclic compound binding;GO:0097159//organic cyclic compound binding;GO:0016491//oxidoreductase activity;GO:0046872//metal ion binding;GO:0004497//monooxygenase activity;GO:0005488//binding;GO:0046914//transition metal ion binding	GO:0008152//metabolic process;GO:0044699//single-organism process;GO:0044710//single-organism metabolic process
XR_002399604.2	--	XM_005012639.3	Cd9	0.964575	0.000108205	NC_040048.1	68697812	68710496	+	NC_040046.1	125878333	125898269	+	--	PREDICTED: CD9 antigen [Anas platyrhynchos]	Organismal Systems	Immune system	ko04640//Hematopoietic cell lineage	K06460	GO:0016020//membrane;GO:0044421//extracellular region part;GO:0031988//membrane-bounded vesicle;GO:0031982//vesicle;GO:0044464//cell part;GO:0005924//cell-substrate adherens junction;GO:0005886//plasma membrane;GO:0044459//plasma membrane part;GO:0043226//organelle;GO:0071944//cell periphery;GO:0005912//adherens junction;GO:0031224//intrinsic component of membrane;GO:0005576//extracellular region…	-	GO:0007043//cell-cell junction assembly;GO:0032501//multicellular organismal process;GO:0022412//cellular process involved in reproduction in multicellular organism;GO:0044699//single-organism process;GO:0071840//cellular component organization or biogenesis;GO:0044763//single-organism cellular process;GO:0034329//cell junction assembly;GO:0000003//reproduction;GO:0044085//cellular component biog…
XR_003492841.1	--	XM_005013244.4	POMT1	-0.96539	0.000100969	NC_040075.1	67349384	67353659	+	NC_040063.1	7206758	7220071	-	--	PREDICTED: protein O-mannosyl-transferase 1 [Anas platyrhynchos]	Metabolism	Glycan biosynthesis and metabolism;Global and overview maps	ko01100//Metabolic pathways;ko00514//Other types of O-glycan biosynthesis;ko00515//Mannose type O-glycan biosyntheis	K00728	GO:0005783//endoplasmic reticulum;GO:0005623//cell;GO:0005622//intracellular;GO:0012505//endomembrane system;GO:0043227//membrane-bounded organelle;GO:0044464//cell part;GO:0031982//vesicle;GO:0016020//membrane;GO:0016023//cytoplasmic, membrane-bounded vesicle;GO:0043226//organelle;GO:0044422//organelle part;GO:0044424//intracellular part;GO:0005737//cytoplasm;GO:0043231//intracellular membrane-b…	-	GO:0019538//protein metabolic process;GO:0044267//cellular protein metabolic process;GO:0005975//carbohydrate metabolic process;GO:0070085//glycosylation;GO:0009100//glycoprotein metabolic process;GO:0036211//protein modification process;GO:0009987//cellular process;GO:0044237//cellular metabolic process;GO:0044710//single-organism metabolic process;GO:0008152//metabolic process;GO:0044260//cellu…
XR_002401453.2	--	XM_005013265.4	ADAMTS13	0.962517	0.000127983	NC_040046.1	21595460	21629325	-	NC_040063.1	6403263	6423671	-	--	PREDICTED: A disintegrin and metalloproteinase with thrombospondin motifs 13 isoform X2 [Anas platyrhynchos]	-	-	-	-	GO:0005576//extracellular region;GO:0031012//extracellular matrix;GO:0044421//extracellular region part	GO:0046914//transition metal ion binding;GO:0008233//peptidase activity;GO:0005488//binding;GO:0043169//cation binding;GO:0043167//ion binding;GO:0003824//catalytic activity;GO:0004175//endopeptidase activity;GO:0070011//peptidase activity, acting on L-amino acid peptides;GO:0046872//metal ion binding;GO:0016787//hydrolase activity	GO:0043603//cellular amide metabolic process;GO:0044238//primary metabolic process;GO:0071704//organic substance metabolic process;GO:0044237//cellular metabolic process;GO:1901564//organonitrogen compound metabolic process;GO:0006807//nitrogen compound metabolic process;GO:0034641//cellular nitrogen compound metabolic process;GO:0043170//macromolecule metabolic process;GO:0008152//metabolic proc…
TCONS_00066773	--	XM_005014383.4	CA4	0.970904	6.02e-05	NC_040075.1	21782117	21795286	+	NC_040065.1	7538847	7555457	+	--	PREDICTED: carbonic anhydrase 4 [Anas platyrhynchos]	Organismal Systems;Metabolism	Excretory system;Energy metabolism	ko00910//Nitrogen metabolism;ko04964//Proximal tubule bicarbonate reclamation	K18246	GO:0031410//cytoplasmic vesicle;GO:0031090//organelle membrane;GO:0043231//intracellular membrane-bounded organelle;GO:0012505//endomembrane system;GO:0005886//plasma membrane;GO:0031982//vesicle;GO:0044464//cell part;GO:0031984//organelle subcompartment;GO:0012506//vesicle membrane;GO:0044446//intracellular organelle part;GO:0031226//intrinsic component of plasma membrane;GO:0005622//intracellul…	GO:0005488//binding;GO:0043169//cation binding;GO:0046914//transition metal ion binding;GO:0046872//metal ion binding;GO:0043167//ion binding	GO:0006820//anion transport;GO:0015711//organic anion transport;GO:0006811//ion transport;GO:0051234//establishment of localization;GO:0044765//single-organism transport;GO:0051179//localization;GO:0006810//transport;GO:1902578//single-organism localization;GO:0044699//single-organism process;GO:0071702//organic substance transport
XR_003500049.1	--	XM_005014383.4	CA4	0.977657	2.74e-05	NC_040057.1	4222351	4229255	+	NC_040065.1	7538847	7555457	+	--	PREDICTED: carbonic anhydrase 4 [Anas platyrhynchos]	Organismal Systems;Metabolism	Excretory system;Energy metabolism	ko00910//Nitrogen metabolism;ko04964//Proximal tubule bicarbonate reclamation	K18246	GO:0031410//cytoplasmic vesicle;GO:0031090//organelle membrane;GO:0043231//intracellular membrane-bounded organelle;GO:0012505//endomembrane system;GO:0005886//plasma membrane;GO:0031982//vesicle;GO:0044464//cell part;GO:0031984//organelle subcompartment;GO:0012506//vesicle membrane;GO:0044446//intracellular organelle part;GO:0031226//intrinsic component of plasma membrane;GO:0005622//intracellul…	GO:0005488//binding;GO:0043169//cation binding;GO:0046914//transition metal ion binding;GO:0046872//metal ion binding;GO:0043167//ion binding	GO:0006820//anion transport;GO:0015711//organic anion transport;GO:0006811//ion transport;GO:0051234//establishment of localization;GO:0044765//single-organism transport;GO:0051179//localization;GO:0006810//transport;GO:1902578//single-organism localization;GO:0044699//single-organism process;GO:0071702//organic substance transport
XR_003501403.1	--	XM_005014552.4	TUBA1D	0.958116	0.000177968	NC_040065.1	998135	1019116	-	NC_040046.1	201458100	201464378	-	--	PREDICTED: tubulin alpha-3 chain [Anser cygnoides domesticus]	Human Diseases;Cellular Processes	Infectious diseases;Cell growth and death;Transport and catabolism;Cellular community - eukaryotes	ko04530//Tight junction;ko04210//Apoptosis;ko04540//Gap junction;ko04145//Phagosome;ko05130//Pathogenic Escherichia coli infection	K07374	GO:0043226//organelle;GO:0032991//macromolecular complex;GO:0005856//cytoskeleton;GO:0005622//intracellular;GO:0043229//intracellular organelle;GO:0043228//non-membrane-bounded organelle;GO:0015630//microtubule cytoskeleton;GO:0005623//cell;GO:0044464//cell part;GO:0044424//intracellular part;GO:0043232//intracellular non-membrane-bounded organelle	GO:0016462//pyrophosphatase activity;GO:0097159//organic cyclic compound binding;GO:0097367//carbohydrate derivative binding;GO:0036094//small molecule binding;GO:0016818//hydrolase activity, acting on acid anhydrides, in phosphorus-containing anhydrides;GO:0005488//binding;GO:1901363//heterocyclic compound binding;GO:0003824//catalytic activity;GO:0001882//nucleoside binding;GO:0032549//ribonucl…	GO:0022607//cellular component assembly;GO:0065003//macromolecular complex assembly;GO:0043933//macromolecular complex subunit organization;GO:0044699//single-organism process;GO:0070271//protein complex biogenesis;GO:0071822//protein complex subunit organization;GO:0043623//cellular protein complex assembly;GO:0016043//cellular component organization;GO:0044763//single-organism cellular process;…
XR_003492395.1	--	XM_005015051.4	Smc6	0.965238	0.000102301	NC_040046.1	56582983	56588056	+	NC_040048.1	106516480	106550517	-	--	PREDICTED: structural maintenance of chromosomes protein 6 [Anas platyrhynchos]	-	-	-	-	GO:0044424//intracellular part;GO:0043228//non-membrane-bounded organelle;GO:0016604//nuclear body;GO:0005654//nucleoplasm;GO:0043227//membrane-bounded organelle;GO:0098687//chromosomal region;GO:0044446//intracellular organelle part;GO:0031974//membrane-enclosed lumen;GO:0043233//organelle lumen;GO:0043232//intracellular non-membrane-bounded organelle;GO:0005634//nucleus;GO:0044464//cell part;GO…	GO:0001883//purine nucleoside binding;GO:0032550//purine ribonucleoside binding;GO:1901363//heterocyclic compound binding;GO:0097159//organic cyclic compound binding;GO:0032549//ribonucleoside binding;GO:0005488//binding;GO:0001882//nucleoside binding;GO:0036094//small molecule binding;GO:0097367//carbohydrate derivative binding	GO:0044710//single-organism metabolic process;GO:0044238//primary metabolic process;GO:0000725//recombinational repair;GO:0044260//cellular macromolecule metabolic process;GO:0007569//cell aging;GO:0009987//cellular process;GO:0050896//response to stimulus;GO:0034641//cellular nitrogen compound metabolic process;GO:0090304//nucleic acid metabolic process;GO:0051716//cellular response to stimulus;…
XR_003496344.1	--	XM_005015051.4	Smc6	0.995803	1.84e-07	NC_040048.1	40261803	40355065	-	NC_040048.1	106516480	106550517	-	--	PREDICTED: structural maintenance of chromosomes protein 6 [Anas platyrhynchos]	-	-	-	-	GO:0044424//intracellular part;GO:0043228//non-membrane-bounded organelle;GO:0016604//nuclear body;GO:0005654//nucleoplasm;GO:0043227//membrane-bounded organelle;GO:0098687//chromosomal region;GO:0044446//intracellular organelle part;GO:0031974//membrane-enclosed lumen;GO:0043233//organelle lumen;GO:0043232//intracellular non-membrane-bounded organelle;GO:0005634//nucleus;GO:0044464//cell part;GO…	GO:0001883//purine nucleoside binding;GO:0032550//purine ribonucleoside binding;GO:1901363//heterocyclic compound binding;GO:0097159//organic cyclic compound binding;GO:0032549//ribonucleoside binding;GO:0005488//binding;GO:0001882//nucleoside binding;GO:0036094//small molecule binding;GO:0097367//carbohydrate derivative binding	GO:0044710//single-organism metabolic process;GO:0044238//primary metabolic process;GO:0000725//recombinational repair;GO:0044260//cellular macromolecule metabolic process;GO:0007569//cell aging;GO:0009987//cellular process;GO:0050896//response to stimulus;GO:0034641//cellular nitrogen compound metabolic process;GO:0090304//nucleic acid metabolic process;GO:0051716//cellular response to stimulus;…
XR_003498498.1	--	XM_005015051.4	Smc6	0.957817	0.000181761	NC_040052.1	13487833	13504177	+	NC_040048.1	106516480	106550517	-	--	PREDICTED: structural maintenance of chromosomes protein 6 [Anas platyrhynchos]	-	-	-	-	GO:0044424//intracellular part;GO:0043228//non-membrane-bounded organelle;GO:0016604//nuclear body;GO:0005654//nucleoplasm;GO:0043227//membrane-bounded organelle;GO:0098687//chromosomal region;GO:0044446//intracellular organelle part;GO:0031974//membrane-enclosed lumen;GO:0043233//organelle lumen;GO:0043232//intracellular non-membrane-bounded organelle;GO:0005634//nucleus;GO:0044464//cell part;GO…	GO:0001883//purine nucleoside binding;GO:0032550//purine ribonucleoside binding;GO:1901363//heterocyclic compound binding;GO:0097159//organic cyclic compound binding;GO:0032549//ribonucleoside binding;GO:0005488//binding;GO:0001882//nucleoside binding;GO:0036094//small molecule binding;GO:0097367//carbohydrate derivative binding	GO:0044710//single-organism metabolic process;GO:0044238//primary metabolic process;GO:0000725//recombinational repair;GO:0044260//cellular macromolecule metabolic process;GO:0007569//cell aging;GO:0009987//cellular process;GO:0050896//response to stimulus;GO:0034641//cellular nitrogen compound metabolic process;GO:0090304//nucleic acid metabolic process;GO:0051716//cellular response to stimulus;…
XR_003501057.1	--	XM_005015294.4	Eml4	0.951803	0.000269882	NC_040063.1	8275910	8287160	-	NC_040048.1	39750774	39840252	-	--	PREDICTED: echinoderm microtubule-associated protein-like 4 isoform X2 [Anas platyrhynchos]	Human Diseases	Cancers	ko05200//Pathways in cancer;ko05223//Non-small cell lung cancer	K15420	GO:0044424//intracellular part;GO:0044464//cell part;GO:0043228//non-membrane-bounded organelle;GO:0043226//organelle;GO:0043232//intracellular non-membrane-bounded organelle;GO:0044446//intracellular organelle part;GO:0005819//spindle;GO:0044422//organelle part;GO:0015630//microtubule cytoskeleton;GO:0043229//intracellular organelle;GO:0044430//cytoskeletal part;GO:0005856//cytoskeleton;GO:00056…	-	-
XR_002399966.2	--	XM_005016028.4	WFIKKN2	0.950661	0.00028927	NC_040050.1	10551771	10569961	+	NC_040064.1	8686655	8691837	-	--	PREDICTED: WAP, Kazal, immunoglobulin, Kunitz and NTR domain-containing protein 2 [Anas platyrhynchos]	-	-	-	-	-	GO:0098772//molecular function regulator;GO:0061134//peptidase regulator activity;GO:0030414//peptidase inhibitor activity;GO:0061135//endopeptidase regulator activity;GO:0030234//enzyme regulator activity;GO:0004857//enzyme inhibitor activity;GO:0004866//endopeptidase inhibitor activity	GO:0051248//negative regulation of protein metabolic process;GO:0009987//cellular process;GO:0050790//regulation of catalytic activity;GO:0042692//muscle cell differentiation;GO:0030154//cell differentiation;GO:0009892//negative regulation of metabolic process;GO:0007165//signal transduction;GO:0007167//enzyme linked receptor protein signaling pathway;GO:0051100//negative regulation of binding;GO…
TCONS_00002296	--	XM_005016063.4	LY6E	0.974167	4.23e-05	NC_040046.1	111228085	111238806	+	NC_040047.1	154522076	154526037	-	--	PREDICTED: ly-6/neurotoxin-like protein 1 isoform X2 [Anas platyrhynchos]	-	-	-	-	-	-	-
XR_003496563.1	--	XM_005016536.4	CRISPLD2	0.957003	0.000192367	NC_040048.1	84612738	84627643	-	NC_040057.1	5926705	5955827	-	--	PREDICTED: cysteine-rich secretory protein LCCL domain-containing 2 [Anas platyrhynchos]	-	-	-	-	GO:0044424//intracellular part;GO:0031410//cytoplasmic vesicle;GO:0016023//cytoplasmic, membrane-bounded vesicle;GO:0005623//cell;GO:0031982//vesicle;GO:0044444//cytoplasmic part;GO:0043231//intracellular membrane-bounded organelle;GO:0031988//membrane-bounded vesicle;GO:0044464//cell part;GO:0043229//intracellular organelle;GO:0005622//intracellular;GO:0043227//membrane-bounded organelle;GO:0043…	GO:0005488//binding;GO:0005539//glycosaminoglycan binding;GO:0097367//carbohydrate derivative binding	GO:0043062//extracellular structure organization;GO:0016043//cellular component organization;GO:0048856//anatomical structure development;GO:0032502//developmental process;GO:0009987//cellular process;GO:0044699//single-organism process;GO:0044763//single-organism cellular process;GO:0009653//anatomical structure morphogenesis;GO:0071840//cellular component organization or biogenesis
TCONS_00017468	--	XM_005016790.3	RBP5	0.956016	0.000205767	NC_040048.1	6291879	6362529	+	NC_040046.1	121949911	121951796	-	--	PREDICTED: retinol-binding protein 5 [Merops nubicus]	-	-	-	-	GO:0043227//membrane-bounded organelle;GO:0031982//vesicle;GO:0031988//membrane-bounded vesicle;GO:0043226//organelle	GO:0005488//binding	GO:0051234//establishment of localization;GO:0051179//localization
TCONS_00033488	--	XM_005016790.3	RBP5	0.955119	0.000218477	NC_040051.1	23112795	23115300	+	NC_040046.1	121949911	121951796	-	--	PREDICTED: retinol-binding protein 5 [Merops nubicus]	-	-	-	-	GO:0043227//membrane-bounded organelle;GO:0031982//vesicle;GO:0031988//membrane-bounded vesicle;GO:0043226//organelle	GO:0005488//binding	GO:0051234//establishment of localization;GO:0051179//localization
XR_003497498.1	--	XM_005016943.4	CX3CR1	0.952574	0.000257277	NC_040050.1	40901292	40912200	-	NC_040047.1	63851978	63866138	-	--	PREDICTED: CX3C chemokine receptor 1 [Anas platyrhynchos]	Environmental Information Processing;Organismal Systems	Signaling molecules and interaction;Immune system	ko04060//Cytokine-cytokine receptor interaction;ko04062//Chemokine signaling pathway	K04192	GO:0016020//membrane;GO:0031224//intrinsic component of membrane;GO:0044425//membrane part	GO:0004950//chemokine receptor activity;GO:0060089//molecular transducer activity;GO:0038023//signaling receptor activity;GO:0004930//G-protein coupled receptor activity;GO:0004896//cytokine receptor activity;GO:0004888//transmembrane signaling receptor activity;GO:0008528//G-protein coupled peptide receptor activity;GO:0001653//peptide receptor activity;GO:0001637//G-protein coupled chemoattract…	GO:0007399//nervous system development;GO:0044700//single organism signaling;GO:0022603//regulation of anatomical structure morphogenesis;GO:0008219//cell death;GO:0097190//apoptotic signaling pathway;GO:0038034//signal transduction in absence of ligand;GO:0034097//response to cytokine;GO:0044707//single-multicellular organism process;GO:0044699//single-organism process;GO:0007166//cell surface r…
XR_003493925.1	--	XM_005017516.3	TFCP2L1	0.969554	6.9e-05	NW_020865859.1	109561	113812	+	NC_040052.1	29762625	29794594	+	--	PREDICTED: transcription factor CP2-like protein 1 [Anas platyrhynchos]	-	-	-	-	GO:0043229//intracellular organelle;GO:0043227//membrane-bounded organelle;GO:0043226//organelle;GO:0044464//cell part;GO:0005622//intracellular;GO:0044424//intracellular part;GO:0043231//intracellular membrane-bounded organelle;GO:0005623//cell	-	GO:0009653//anatomical structure morphogenesis;GO:0048869//cellular developmental process;GO:0044763//single-organism cellular process;GO:0048856//anatomical structure development;GO:0032502//developmental process;GO:0044767//single-organism developmental process;GO:0048468//cell development;GO:0048731//system development;GO:0007568//aging;GO:0021700//developmental maturation;GO:0048469//cell mat…
XR_003500183.1	--	XM_005017516.3	TFCP2L1	0.968527	7.61e-05	NC_040046.1	8404934	8425213	+	NC_040052.1	29762625	29794594	+	--	PREDICTED: transcription factor CP2-like protein 1 [Anas platyrhynchos]	-	-	-	-	GO:0043229//intracellular organelle;GO:0043227//membrane-bounded organelle;GO:0043226//organelle;GO:0044464//cell part;GO:0005622//intracellular;GO:0044424//intracellular part;GO:0043231//intracellular membrane-bounded organelle;GO:0005623//cell	-	GO:0009653//anatomical structure morphogenesis;GO:0048869//cellular developmental process;GO:0044763//single-organism cellular process;GO:0048856//anatomical structure development;GO:0032502//developmental process;GO:0044767//single-organism developmental process;GO:0048468//cell development;GO:0048731//system development;GO:0007568//aging;GO:0021700//developmental maturation;GO:0048469//cell mat…
XR_003496344.1	--	XM_005017543.4	ITGB5	0.986342	6.31e-06	NC_040048.1	40261803	40355065	-	NC_040052.1	27775541	27822971	+	--	PREDICTED: LOW QUALITY PROTEIN: integrin beta-5 [Anas platyrhynchos]	Human Diseases;Environmental Information Processing;Cellular Processes	Cellular community - eukaryotes;Cardiovascular diseases;Infectious diseases;Cell motility;Signaling molecules and interaction;Signal transduction;Cancers;Transport and catabolism	ko05165//Human papillomavirus infection;ko04151//PI3K-Akt signaling pathway;ko05205//Proteoglycans in cancer;ko04810//Regulation of actin cytoskeleton;ko04510//Focal adhesion;ko05412//Arrhythmogenic right ventricular cardiomyopathy (ARVC);ko05410//Hypertrophic cardiomyopathy (HCM);ko05414//Dilated cardiomyopathy (DCM);ko04512//ECM-receptor interaction;ko04145//Phagosome	K06588	GO:0005912//adherens junction;GO:0098636//protein complex involved in cell adhesion;GO:0044425//membrane part;GO:0044459//plasma membrane part;GO:0005924//cell-substrate adherens junction;GO:0070161//anchoring junction;GO:0031982//vesicle;GO:0031224//intrinsic component of membrane;GO:0030055//cell-substrate junction;GO:0016020//membrane;GO:0098797//plasma membrane protein complex;GO:0031226//int…	GO:0005102//receptor binding;GO:0005488//binding;GO:0005515//protein binding	GO:0051017//actin filament bundle assembly;GO:0044763//single-organism cellular process;GO:0022610//biological adhesion;GO:0007178//transmembrane receptor protein serine/threonine kinase signaling pathway;GO:0098609//cell-cell adhesion;GO:0032502//developmental process;GO:0044767//single-organism developmental process;GO:0023052//signaling;GO:0071840//cellular component organization or biogenesis…
XR_003498498.1	--	XM_005017543.4	ITGB5	0.966793	8.93e-05	NC_040052.1	13487833	13504177	+	NC_040052.1	27775541	27822971	+	--	PREDICTED: LOW QUALITY PROTEIN: integrin beta-5 [Anas platyrhynchos]	Human Diseases;Environmental Information Processing;Cellular Processes	Cellular community - eukaryotes;Cardiovascular diseases;Infectious diseases;Cell motility;Signaling molecules and interaction;Signal transduction;Cancers;Transport and catabolism	ko05165//Human papillomavirus infection;ko04151//PI3K-Akt signaling pathway;ko05205//Proteoglycans in cancer;ko04810//Regulation of actin cytoskeleton;ko04510//Focal adhesion;ko05412//Arrhythmogenic right ventricular cardiomyopathy (ARVC);ko05410//Hypertrophic cardiomyopathy (HCM);ko05414//Dilated cardiomyopathy (DCM);ko04512//ECM-receptor interaction;ko04145//Phagosome	K06588	GO:0005912//adherens junction;GO:0098636//protein complex involved in cell adhesion;GO:0044425//membrane part;GO:0044459//plasma membrane part;GO:0005924//cell-substrate adherens junction;GO:0070161//anchoring junction;GO:0031982//vesicle;GO:0031224//intrinsic component of membrane;GO:0030055//cell-substrate junction;GO:0016020//membrane;GO:0098797//plasma membrane protein complex;GO:0031226//int…	GO:0005102//receptor binding;GO:0005488//binding;GO:0005515//protein binding	GO:0051017//actin filament bundle assembly;GO:0044763//single-organism cellular process;GO:0022610//biological adhesion;GO:0007178//transmembrane receptor protein serine/threonine kinase signaling pathway;GO:0098609//cell-cell adhesion;GO:0032502//developmental process;GO:0044767//single-organism developmental process;GO:0023052//signaling;GO:0071840//cellular component organization or biogenesis…
XR_002401822.2	--	XM_005017768.4	NCF1	0.973253	4.69e-05	NC_040048.1	6291879	6362529	+	NC_040074.1	1460568	1468805	+	--	PREDICTED: neutrophil cytosol factor 1 [Anas platyrhynchos]	Organismal Systems;Human Diseases;Cellular Processes	Transport and catabolism;Infectious diseases;Cardiovascular diseases;Immune system;Development	ko04062//Chemokine signaling pathway;ko04666//Fc gamma R-mediated phagocytosis;ko05418//Fluid shear stress and atherosclerosis;ko04380//Osteoclast differentiation;ko04670//Leukocyte transendothelial migration;ko04145//Phagosome;ko05140//Leishmaniasis	K08011	GO:0016020//membrane;GO:0005886//plasma membrane;GO:0005623//cell;GO:0005737//cytoplasm;GO:0044459//plasma membrane part;GO:0044425//membrane part;GO:0005622//intracellular;GO:0044444//cytoplasmic part;GO:0044424//intracellular part;GO:0044464//cell part;GO:0071944//cell periphery	GO:0005488//binding;GO:0016491//oxidoreductase activity;GO:0008289//lipid binding;GO:1901981//phosphatidylinositol phosphate binding;GO:0005515//protein binding;GO:0043167//ion binding;GO:0005543//phospholipid binding;GO:0016651//oxidoreductase activity, acting on NAD(P)H;GO:0003824//catalytic activity;GO:0035091//phosphatidylinositol binding;GO:1902936//phosphatidylinositol bisphosphate binding;…	GO:0042743//hydrogen peroxide metabolic process;GO:0044419//interspecies interaction between organisms;GO:0035821//modification of morphology or physiology of other organism;GO:0006886//intracellular protein transport;GO:0002446//neutrophil mediated immunity;GO:0044765//single-organism transport;GO:0001909//leukocyte mediated cytotoxicity;GO:0071704//organic substance metabolic process;GO:0009620…
XR_003498444.1	--	XM_005017768.4	NCF1	0.965942	9.63e-05	NC_040046.1	202009175	202011624	-	NC_040074.1	1460568	1468805	+	--	PREDICTED: neutrophil cytosol factor 1 [Anas platyrhynchos]	Organismal Systems;Human Diseases;Cellular Processes	Transport and catabolism;Infectious diseases;Cardiovascular diseases;Immune system;Development	ko04062//Chemokine signaling pathway;ko04666//Fc gamma R-mediated phagocytosis;ko05418//Fluid shear stress and atherosclerosis;ko04380//Osteoclast differentiation;ko04670//Leukocyte transendothelial migration;ko04145//Phagosome;ko05140//Leishmaniasis	K08011	GO:0016020//membrane;GO:0005886//plasma membrane;GO:0005623//cell;GO:0005737//cytoplasm;GO:0044459//plasma membrane part;GO:0044425//membrane part;GO:0005622//intracellular;GO:0044444//cytoplasmic part;GO:0044424//intracellular part;GO:0044464//cell part;GO:0071944//cell periphery	GO:0005488//binding;GO:0016491//oxidoreductase activity;GO:0008289//lipid binding;GO:1901981//phosphatidylinositol phosphate binding;GO:0005515//protein binding;GO:0043167//ion binding;GO:0005543//phospholipid binding;GO:0016651//oxidoreductase activity, acting on NAD(P)H;GO:0003824//catalytic activity;GO:0035091//phosphatidylinositol binding;GO:1902936//phosphatidylinositol bisphosphate binding;…	GO:0042743//hydrogen peroxide metabolic process;GO:0044419//interspecies interaction between organisms;GO:0035821//modification of morphology or physiology of other organism;GO:0006886//intracellular protein transport;GO:0002446//neutrophil mediated immunity;GO:0044765//single-organism transport;GO:0001909//leukocyte mediated cytotoxicity;GO:0071704//organic substance metabolic process;GO:0009620…
XR_003496563.1	--	XM_005018168.4	PELI1	0.965338	0.00010142	NC_040048.1	84612738	84627643	-	NC_040048.1	14648204	14666270	+	--	E3 ubiquitin-protein ligase pellino-like 1, partial [Ophiophagus hannah]	-	-	-	-	GO:0005623//cell;GO:0043231//intracellular membrane-bounded organelle;GO:0043226//organelle;GO:0005622//intracellular;GO:0043227//membrane-bounded organelle;GO:0043229//intracellular organelle;GO:0044424//intracellular part;GO:0044464//cell part	GO:0003824//catalytic activity;GO:0016740//transferase activity;GO:0019787//ubiquitin-like protein transferase activity	GO:0019219//regulation of nucleobase-containing compound metabolic process;GO:0048518//positive regulation of biological process;GO:0032501//multicellular organismal process;GO:0044699//single-organism process;GO:0043433//negative regulation of sequence-specific DNA binding transcription factor activity;GO:0051171//regulation of nitrogen compound metabolic process;GO:0007162//negative regulation …
XR_003499826.1	--	XM_005018168.4	PELI1	-0.958191	0.000177025	NC_040056.1	18518799	18521402	+	NC_040048.1	14648204	14666270	+	--	E3 ubiquitin-protein ligase pellino-like 1, partial [Ophiophagus hannah]	-	-	-	-	GO:0005623//cell;GO:0043231//intracellular membrane-bounded organelle;GO:0043226//organelle;GO:0005622//intracellular;GO:0043227//membrane-bounded organelle;GO:0043229//intracellular organelle;GO:0044424//intracellular part;GO:0044464//cell part	GO:0003824//catalytic activity;GO:0016740//transferase activity;GO:0019787//ubiquitin-like protein transferase activity	GO:0019219//regulation of nucleobase-containing compound metabolic process;GO:0048518//positive regulation of biological process;GO:0032501//multicellular organismal process;GO:0044699//single-organism process;GO:0043433//negative regulation of sequence-specific DNA binding transcription factor activity;GO:0051171//regulation of nitrogen compound metabolic process;GO:0007162//negative regulation …
TCONS_00034887	--	XM_005019265.4	SOD3	0.961026	0.000143703	NC_040051.1	23189695	23192304	-	NC_040049.1	57687970	57689449	-	--	PREDICTED: extracellular superoxide dismutase [Cu-Zn] isoform X1 [Anas platyrhynchos]	-	-	-	-	GO:0043226//organelle;GO:0005576//extracellular region;GO:0044422//organelle part;GO:0044424//intracellular part;GO:0031984//organelle subcompartment;GO:0043227//membrane-bounded organelle;GO:0005622//intracellular;GO:0044464//cell part;GO:0031988//membrane-bounded vesicle;GO:0005623//cell;GO:0043229//intracellular organelle;GO:0031982//vesicle;GO:0044446//intracellular organelle part;GO:0044421/…	GO:0043169//cation binding;GO:0005488//binding;GO:0046872//metal ion binding;GO:0043167//ion binding;GO:0046914//transition metal ion binding;GO:0016209//antioxidant activity;GO:0003824//catalytic activity	GO:0072593//reactive oxygen species metabolic process;GO:0008152//metabolic process;GO:0006801//superoxide metabolic process;GO:0044699//single-organism process;GO:0044237//cellular metabolic process;GO:0044710//single-organism metabolic process;GO:0009987//cellular process
XR_003493494.1	--	XM_005019265.4	SOD3	0.9681	7.92e-05	NW_020865354.1	139234	142453	+	NC_040049.1	57687970	57689449	-	--	PREDICTED: extracellular superoxide dismutase [Cu-Zn] isoform X1 [Anas platyrhynchos]	-	-	-	-	GO:0043226//organelle;GO:0005576//extracellular region;GO:0044422//organelle part;GO:0044424//intracellular part;GO:0031984//organelle subcompartment;GO:0043227//membrane-bounded organelle;GO:0005622//intracellular;GO:0044464//cell part;GO:0031988//membrane-bounded vesicle;GO:0005623//cell;GO:0043229//intracellular organelle;GO:0031982//vesicle;GO:0044446//intracellular organelle part;GO:0044421/…	GO:0043169//cation binding;GO:0005488//binding;GO:0046872//metal ion binding;GO:0043167//ion binding;GO:0046914//transition metal ion binding;GO:0016209//antioxidant activity;GO:0003824//catalytic activity	GO:0072593//reactive oxygen species metabolic process;GO:0008152//metabolic process;GO:0006801//superoxide metabolic process;GO:0044699//single-organism process;GO:0044237//cellular metabolic process;GO:0044710//single-organism metabolic process;GO:0009987//cellular process
TCONS_00011831	--	XM_005019678.4	St14	0.957126	0.000190745	NC_040047.1	57385662	57388153	+	NC_040070.1	1927916	1952135	+	--	PREDICTED: suppressor of tumorigenicity 14 protein isoform X1 [Anas platyrhynchos]	Human Diseases	Cancers	ko05206//MicroRNAs in cancer	K08670	GO:0031982//vesicle;GO:0019898//extrinsic component of membrane;GO:0031988//membrane-bounded vesicle;GO:0043227//membrane-bounded organelle;GO:0043226//organelle;GO:0016020//membrane;GO:0044425//membrane part	GO:0016787//hydrolase activity;GO:0004175//endopeptidase activity;GO:0003824//catalytic activity;GO:0008233//peptidase activity;GO:0070011//peptidase activity, acting on L-amino acid peptides	GO:0030154//cell differentiation;GO:0019538//protein metabolic process;GO:0043170//macromolecule metabolic process;GO:0030855//epithelial cell differentiation;GO:0044763//single-organism cellular process;GO:0009987//cellular process;GO:0009913//epidermal cell differentiation;GO:0009888//tissue development;GO:0071704//organic substance metabolic process;GO:0048869//cellular developmental process;G…
XR_001191758.3	--	XM_005019678.4	St14	0.967346	8.49e-05	NC_040050.1	41581064	41582802	+	NC_040070.1	1927916	1952135	+	--	PREDICTED: suppressor of tumorigenicity 14 protein isoform X1 [Anas platyrhynchos]	Human Diseases	Cancers	ko05206//MicroRNAs in cancer	K08670	GO:0031982//vesicle;GO:0019898//extrinsic component of membrane;GO:0031988//membrane-bounded vesicle;GO:0043227//membrane-bounded organelle;GO:0043226//organelle;GO:0016020//membrane;GO:0044425//membrane part	GO:0016787//hydrolase activity;GO:0004175//endopeptidase activity;GO:0003824//catalytic activity;GO:0008233//peptidase activity;GO:0070011//peptidase activity, acting on L-amino acid peptides	GO:0030154//cell differentiation;GO:0019538//protein metabolic process;GO:0043170//macromolecule metabolic process;GO:0030855//epithelial cell differentiation;GO:0044763//single-organism cellular process;GO:0009987//cellular process;GO:0009913//epidermal cell differentiation;GO:0009888//tissue development;GO:0071704//organic substance metabolic process;GO:0048869//cellular developmental process;G…
XR_002399829.2	--	XM_005019678.4	St14	0.951534	0.000274361	NC_040047.1	56461086	56480714	+	NC_040070.1	1927916	1952135	+	--	PREDICTED: suppressor of tumorigenicity 14 protein isoform X1 [Anas platyrhynchos]	Human Diseases	Cancers	ko05206//MicroRNAs in cancer	K08670	GO:0031982//vesicle;GO:0019898//extrinsic component of membrane;GO:0031988//membrane-bounded vesicle;GO:0043227//membrane-bounded organelle;GO:0043226//organelle;GO:0016020//membrane;GO:0044425//membrane part	GO:0016787//hydrolase activity;GO:0004175//endopeptidase activity;GO:0003824//catalytic activity;GO:0008233//peptidase activity;GO:0070011//peptidase activity, acting on L-amino acid peptides	GO:0030154//cell differentiation;GO:0019538//protein metabolic process;GO:0043170//macromolecule metabolic process;GO:0030855//epithelial cell differentiation;GO:0044763//single-organism cellular process;GO:0009987//cellular process;GO:0009913//epidermal cell differentiation;GO:0009888//tissue development;GO:0071704//organic substance metabolic process;GO:0048869//cellular developmental process;G…
XR_003492443.1	--	XM_005019678.4	St14	0.953486	0.000242891	NC_040070.1	2110458	2150180	-	NC_040070.1	1927916	1952135	+	--	PREDICTED: suppressor of tumorigenicity 14 protein isoform X1 [Anas platyrhynchos]	Human Diseases	Cancers	ko05206//MicroRNAs in cancer	K08670	GO:0031982//vesicle;GO:0019898//extrinsic component of membrane;GO:0031988//membrane-bounded vesicle;GO:0043227//membrane-bounded organelle;GO:0043226//organelle;GO:0016020//membrane;GO:0044425//membrane part	GO:0016787//hydrolase activity;GO:0004175//endopeptidase activity;GO:0003824//catalytic activity;GO:0008233//peptidase activity;GO:0070011//peptidase activity, acting on L-amino acid peptides	GO:0030154//cell differentiation;GO:0019538//protein metabolic process;GO:0043170//macromolecule metabolic process;GO:0030855//epithelial cell differentiation;GO:0044763//single-organism cellular process;GO:0009987//cellular process;GO:0009913//epidermal cell differentiation;GO:0009888//tissue development;GO:0071704//organic substance metabolic process;GO:0048869//cellular developmental process;G…
XR_003493505.1	--	XM_005019678.4	St14	0.965161	0.000102971	NW_020865371.1	131927	136331	+	NC_040070.1	1927916	1952135	+	--	PREDICTED: suppressor of tumorigenicity 14 protein isoform X1 [Anas platyrhynchos]	Human Diseases	Cancers	ko05206//MicroRNAs in cancer	K08670	GO:0031982//vesicle;GO:0019898//extrinsic component of membrane;GO:0031988//membrane-bounded vesicle;GO:0043227//membrane-bounded organelle;GO:0043226//organelle;GO:0016020//membrane;GO:0044425//membrane part	GO:0016787//hydrolase activity;GO:0004175//endopeptidase activity;GO:0003824//catalytic activity;GO:0008233//peptidase activity;GO:0070011//peptidase activity, acting on L-amino acid peptides	GO:0030154//cell differentiation;GO:0019538//protein metabolic process;GO:0043170//macromolecule metabolic process;GO:0030855//epithelial cell differentiation;GO:0044763//single-organism cellular process;GO:0009987//cellular process;GO:0009913//epidermal cell differentiation;GO:0009888//tissue development;GO:0071704//organic substance metabolic process;GO:0048869//cellular developmental process;G…
XR_003499478.1	--	XM_005019678.4	St14	0.987302	5.07e-06	NC_040055.1	15146170	15401948	-	NC_040070.1	1927916	1952135	+	--	PREDICTED: suppressor of tumorigenicity 14 protein isoform X1 [Anas platyrhynchos]	Human Diseases	Cancers	ko05206//MicroRNAs in cancer	K08670	GO:0031982//vesicle;GO:0019898//extrinsic component of membrane;GO:0031988//membrane-bounded vesicle;GO:0043227//membrane-bounded organelle;GO:0043226//organelle;GO:0016020//membrane;GO:0044425//membrane part	GO:0016787//hydrolase activity;GO:0004175//endopeptidase activity;GO:0003824//catalytic activity;GO:0008233//peptidase activity;GO:0070011//peptidase activity, acting on L-amino acid peptides	GO:0030154//cell differentiation;GO:0019538//protein metabolic process;GO:0043170//macromolecule metabolic process;GO:0030855//epithelial cell differentiation;GO:0044763//single-organism cellular process;GO:0009987//cellular process;GO:0009913//epidermal cell differentiation;GO:0009888//tissue development;GO:0071704//organic substance metabolic process;GO:0048869//cellular developmental process;G…
TCONS_00011831	--	XM_005019679.4	St14	0.957126	0.000190745	NC_040047.1	57385662	57388153	+	NC_040070.1	1930386	1952135	+	--	PREDICTED: suppressor of tumorigenicity 14 protein isoform X1 [Anas platyrhynchos]	Human Diseases	Cancers	ko05206//MicroRNAs in cancer	K08670	GO:0016020//membrane;GO:0031988//membrane-bounded vesicle;GO:0031982//vesicle;GO:0043226//organelle;GO:0044425//membrane part;GO:0019898//extrinsic component of membrane;GO:0043227//membrane-bounded organelle	GO:0004175//endopeptidase activity;GO:0016787//hydrolase activity;GO:0070011//peptidase activity, acting on L-amino acid peptides;GO:0003824//catalytic activity;GO:0008233//peptidase activity	GO:0060429//epithelium development;GO:0009913//epidermal cell differentiation;GO:0044238//primary metabolic process;GO:0030855//epithelial cell differentiation;GO:0043170//macromolecule metabolic process;GO:0071704//organic substance metabolic process;GO:0009987//cellular process;GO:0032502//developmental process;GO:0048869//cellular developmental process;GO:0019538//protein metabolic process;GO:…
XR_001191758.3	--	XM_005019679.4	St14	0.967346	8.49e-05	NC_040050.1	41581064	41582802	+	NC_040070.1	1930386	1952135	+	--	PREDICTED: suppressor of tumorigenicity 14 protein isoform X1 [Anas platyrhynchos]	Human Diseases	Cancers	ko05206//MicroRNAs in cancer	K08670	GO:0016020//membrane;GO:0031988//membrane-bounded vesicle;GO:0031982//vesicle;GO:0043226//organelle;GO:0044425//membrane part;GO:0019898//extrinsic component of membrane;GO:0043227//membrane-bounded organelle	GO:0004175//endopeptidase activity;GO:0016787//hydrolase activity;GO:0070011//peptidase activity, acting on L-amino acid peptides;GO:0003824//catalytic activity;GO:0008233//peptidase activity	GO:0060429//epithelium development;GO:0009913//epidermal cell differentiation;GO:0044238//primary metabolic process;GO:0030855//epithelial cell differentiation;GO:0043170//macromolecule metabolic process;GO:0071704//organic substance metabolic process;GO:0009987//cellular process;GO:0032502//developmental process;GO:0048869//cellular developmental process;GO:0019538//protein metabolic process;GO:…
XR_002399829.2	--	XM_005019679.4	St14	0.951534	0.000274361	NC_040047.1	56461086	56480714	+	NC_040070.1	1930386	1952135	+	--	PREDICTED: suppressor of tumorigenicity 14 protein isoform X1 [Anas platyrhynchos]	Human Diseases	Cancers	ko05206//MicroRNAs in cancer	K08670	GO:0016020//membrane;GO:0031988//membrane-bounded vesicle;GO:0031982//vesicle;GO:0043226//organelle;GO:0044425//membrane part;GO:0019898//extrinsic component of membrane;GO:0043227//membrane-bounded organelle	GO:0004175//endopeptidase activity;GO:0016787//hydrolase activity;GO:0070011//peptidase activity, acting on L-amino acid peptides;GO:0003824//catalytic activity;GO:0008233//peptidase activity	GO:0060429//epithelium development;GO:0009913//epidermal cell differentiation;GO:0044238//primary metabolic process;GO:0030855//epithelial cell differentiation;GO:0043170//macromolecule metabolic process;GO:0071704//organic substance metabolic process;GO:0009987//cellular process;GO:0032502//developmental process;GO:0048869//cellular developmental process;GO:0019538//protein metabolic process;GO:…
XR_003492443.1	--	XM_005019679.4	St14	0.953486	0.000242891	NC_040070.1	2110458	2150180	-	NC_040070.1	1930386	1952135	+	--	PREDICTED: suppressor of tumorigenicity 14 protein isoform X1 [Anas platyrhynchos]	Human Diseases	Cancers	ko05206//MicroRNAs in cancer	K08670	GO:0016020//membrane;GO:0031988//membrane-bounded vesicle;GO:0031982//vesicle;GO:0043226//organelle;GO:0044425//membrane part;GO:0019898//extrinsic component of membrane;GO:0043227//membrane-bounded organelle	GO:0004175//endopeptidase activity;GO:0016787//hydrolase activity;GO:0070011//peptidase activity, acting on L-amino acid peptides;GO:0003824//catalytic activity;GO:0008233//peptidase activity	GO:0060429//epithelium development;GO:0009913//epidermal cell differentiation;GO:0044238//primary metabolic process;GO:0030855//epithelial cell differentiation;GO:0043170//macromolecule metabolic process;GO:0071704//organic substance metabolic process;GO:0009987//cellular process;GO:0032502//developmental process;GO:0048869//cellular developmental process;GO:0019538//protein metabolic process;GO:…
XR_003493505.1	--	XM_005019679.4	St14	0.965161	0.000102971	NW_020865371.1	131927	136331	+	NC_040070.1	1930386	1952135	+	--	PREDICTED: suppressor of tumorigenicity 14 protein isoform X1 [Anas platyrhynchos]	Human Diseases	Cancers	ko05206//MicroRNAs in cancer	K08670	GO:0016020//membrane;GO:0031988//membrane-bounded vesicle;GO:0031982//vesicle;GO:0043226//organelle;GO:0044425//membrane part;GO:0019898//extrinsic component of membrane;GO:0043227//membrane-bounded organelle	GO:0004175//endopeptidase activity;GO:0016787//hydrolase activity;GO:0070011//peptidase activity, acting on L-amino acid peptides;GO:0003824//catalytic activity;GO:0008233//peptidase activity	GO:0060429//epithelium development;GO:0009913//epidermal cell differentiation;GO:0044238//primary metabolic process;GO:0030855//epithelial cell differentiation;GO:0043170//macromolecule metabolic process;GO:0071704//organic substance metabolic process;GO:0009987//cellular process;GO:0032502//developmental process;GO:0048869//cellular developmental process;GO:0019538//protein metabolic process;GO:…
XR_003499478.1	--	XM_005019679.4	St14	0.987302	5.07e-06	NC_040055.1	15146170	15401948	-	NC_040070.1	1930386	1952135	+	--	PREDICTED: suppressor of tumorigenicity 14 protein isoform X1 [Anas platyrhynchos]	Human Diseases	Cancers	ko05206//MicroRNAs in cancer	K08670	GO:0016020//membrane;GO:0031988//membrane-bounded vesicle;GO:0031982//vesicle;GO:0043226//organelle;GO:0044425//membrane part;GO:0019898//extrinsic component of membrane;GO:0043227//membrane-bounded organelle	GO:0004175//endopeptidase activity;GO:0016787//hydrolase activity;GO:0070011//peptidase activity, acting on L-amino acid peptides;GO:0003824//catalytic activity;GO:0008233//peptidase activity	GO:0060429//epithelium development;GO:0009913//epidermal cell differentiation;GO:0044238//primary metabolic process;GO:0030855//epithelial cell differentiation;GO:0043170//macromolecule metabolic process;GO:0071704//organic substance metabolic process;GO:0009987//cellular process;GO:0032502//developmental process;GO:0048869//cellular developmental process;GO:0019538//protein metabolic process;GO:…
TCONS_00016179	--	XM_005019843.4	RRH	0.953575	0.00024152	NC_040047.1	110241725	110303752	-	NC_040049.1	4078428	4094144	-	--	PREDICTED: visual pigment-like receptor peropsin isoform X1 [Anas platyrhynchos]	-	-	-	-	GO:0031224//intrinsic component of membrane;GO:0016020//membrane;GO:0044425//membrane part	GO:0004888//transmembrane signaling receptor activity;GO:0038023//signaling receptor activity;GO:0004871//signal transducer activity;GO:0099600//transmembrane receptor activity;GO:0060089//molecular transducer activity;GO:0004872//receptor activity	GO:0008152//metabolic process;GO:0007166//cell surface receptor signaling pathway;GO:0051716//cellular response to stimulus;GO:0044260//cellular macromolecule metabolic process;GO:0043170//macromolecule metabolic process;GO:0044237//cellular metabolic process;GO:0007154//cell communication;GO:0006464//cellular protein modification process;GO:0036211//protein modification process;GO:0007600//senso…
TCONS_00048908	--	XM_005019843.4	RRH	0.951528	0.000274463	NC_040058.1	339960	346502	+	NC_040049.1	4078428	4094144	-	--	PREDICTED: visual pigment-like receptor peropsin isoform X1 [Anas platyrhynchos]	-	-	-	-	GO:0031224//intrinsic component of membrane;GO:0016020//membrane;GO:0044425//membrane part	GO:0004888//transmembrane signaling receptor activity;GO:0038023//signaling receptor activity;GO:0004871//signal transducer activity;GO:0099600//transmembrane receptor activity;GO:0060089//molecular transducer activity;GO:0004872//receptor activity	GO:0008152//metabolic process;GO:0007166//cell surface receptor signaling pathway;GO:0051716//cellular response to stimulus;GO:0044260//cellular macromolecule metabolic process;GO:0043170//macromolecule metabolic process;GO:0044237//cellular metabolic process;GO:0007154//cell communication;GO:0006464//cellular protein modification process;GO:0036211//protein modification process;GO:0007600//senso…
TCONS_00008389	--	XM_005020205.4	FAM120B	0.956952	0.00019305	NC_040046.1	129859216	129875551	-	NC_040048.1	42733932	42794137	-	--	PREDICTED: constitutive coactivator of peroxisome proliferator-activated receptor gamma isoform X1 [Anas platyrhynchos]	-	-	-	-	-	-	-
TCONS_00023690	--	XM_005020205.4	FAM120B	0.955427	0.000214054	NC_040049.1	7077553	7084395	+	NC_040048.1	42733932	42794137	-	--	PREDICTED: constitutive coactivator of peroxisome proliferator-activated receptor gamma isoform X1 [Anas platyrhynchos]	-	-	-	-	-	-	-
TCONS_00023693	--	XM_005020205.4	FAM120B	0.952344	0.000261006	NC_040049.1	7085229	7088193	+	NC_040048.1	42733932	42794137	-	--	PREDICTED: constitutive coactivator of peroxisome proliferator-activated receptor gamma isoform X1 [Anas platyrhynchos]	-	-	-	-	-	-	-
TCONS_00061153	--	XM_005020205.4	FAM120B	0.951707	0.00027147	NC_040067.1	4282222	4303667	+	NC_040048.1	42733932	42794137	-	--	PREDICTED: constitutive coactivator of peroxisome proliferator-activated receptor gamma isoform X1 [Anas platyrhynchos]	-	-	-	-	-	-	-
XR_001191758.3	--	XM_005020205.4	FAM120B	0.979237	2.2e-05	NC_040050.1	41581064	41582802	+	NC_040048.1	42733932	42794137	-	--	PREDICTED: constitutive coactivator of peroxisome proliferator-activated receptor gamma isoform X1 [Anas platyrhynchos]	-	-	-	-	-	-	-
XR_002404149.2	--	XM_005020205.4	FAM120B	0.974996	3.84e-05	NC_040049.1	75102297	75111170	+	NC_040048.1	42733932	42794137	-	--	PREDICTED: constitutive coactivator of peroxisome proliferator-activated receptor gamma isoform X1 [Anas platyrhynchos]	-	-	-	-	-	-	-
XR_002404603.2	--	XM_005020205.4	FAM120B	0.993672	6.3e-07	NW_020865824.1	26310	33485	-	NC_040048.1	42733932	42794137	-	--	PREDICTED: constitutive coactivator of peroxisome proliferator-activated receptor gamma isoform X1 [Anas platyrhynchos]	-	-	-	-	-	-	-
XR_003492494.1	--	XM_005020205.4	FAM120B	0.957609	0.000184439	NC_040070.1	4732667	4879343	-	NC_040048.1	42733932	42794137	-	--	PREDICTED: constitutive coactivator of peroxisome proliferator-activated receptor gamma isoform X1 [Anas platyrhynchos]	-	-	-	-	-	-	-
XR_003493829.1	--	XM_005020205.4	FAM120B	0.950383	0.000294115	NW_020865675.1	36803	38302	+	NC_040048.1	42733932	42794137	-	--	PREDICTED: constitutive coactivator of peroxisome proliferator-activated receptor gamma isoform X1 [Anas platyrhynchos]	-	-	-	-	-	-	-
XR_003494933.1	--	XM_005020205.4	FAM120B	0.983744	1.06e-05	NC_040046.1	122057549	122059719	+	NC_040048.1	42733932	42794137	-	--	PREDICTED: constitutive coactivator of peroxisome proliferator-activated receptor gamma isoform X1 [Anas platyrhynchos]	-	-	-	-	-	-	-
XR_003496080.1	--	XM_005020205.4	FAM120B	0.957566	0.000184994	NC_040048.1	13579017	13583395	-	NC_040048.1	42733932	42794137	-	--	PREDICTED: constitutive coactivator of peroxisome proliferator-activated receptor gamma isoform X1 [Anas platyrhynchos]	-	-	-	-	-	-	-
XR_003496543.1	--	XM_005020205.4	FAM120B	0.957301	0.00018844	NC_040048.1	81233801	81241482	+	NC_040048.1	42733932	42794137	-	--	PREDICTED: constitutive coactivator of peroxisome proliferator-activated receptor gamma isoform X1 [Anas platyrhynchos]	-	-	-	-	-	-	-
XR_003497509.1	--	XM_005020205.4	FAM120B	0.952631	0.000256376	NC_040050.1	61187374	61379338	-	NC_040048.1	42733932	42794137	-	--	PREDICTED: constitutive coactivator of peroxisome proliferator-activated receptor gamma isoform X1 [Anas platyrhynchos]	-	-	-	-	-	-	-
XR_003497532.1	--	XM_005020205.4	FAM120B	0.970385	6.35e-05	NC_040050.1	27345810	27347757	+	NC_040048.1	42733932	42794137	-	--	PREDICTED: constitutive coactivator of peroxisome proliferator-activated receptor gamma isoform X1 [Anas platyrhynchos]	-	-	-	-	-	-	-
XR_003501547.1	--	XM_005020205.4	FAM120B	0.957265	0.000188913	NC_040066.1	4470374	4504211	+	NC_040048.1	42733932	42794137	-	--	PREDICTED: constitutive coactivator of peroxisome proliferator-activated receptor gamma isoform X1 [Anas platyrhynchos]	-	-	-	-	-	-	-
XR_216861.4	--	XM_005020205.4	FAM120B	0.96241	0.000129077	NC_040066.1	426128	429322	-	NC_040048.1	42733932	42794137	-	--	PREDICTED: constitutive coactivator of peroxisome proliferator-activated receptor gamma isoform X1 [Anas platyrhynchos]	-	-	-	-	-	-	-
TCONS_00005095	--	XM_005020961.4	SFRP2	0.966195	9.41e-05	NC_040046.1	2034524	2046909	-	NC_040049.1	31581867	31586221	+	--	secreted frizzled-related protein 2 [Anas platyrhynchos]	Environmental Information Processing	Signal transduction	ko04310//Wnt signaling pathway	K02176	GO:0005576//extracellular region;GO:0044421//extracellular region part	GO:0061134//peptidase regulator activity;GO:0005102//receptor binding;GO:0005515//protein binding;GO:0030234//enzyme regulator activity;GO:0098772//molecular function regulator;GO:0008047//enzyme activator activity;GO:0005488//binding;GO:0061135//endopeptidase regulator activity	GO:0009893//positive regulation of metabolic process;GO:0003208//cardiac ventricle morphogenesis;GO:0044700//single organism signaling;GO:0008285//negative regulation of cell proliferation;GO:0042221//response to chemical;GO:0044093//positive regulation of molecular function;GO:0001558//regulation of cell growth;GO:0010769//regulation of cell morphogenesis involved in differentiation;GO:0032268//…
XR_001192142.3	--	XM_005020961.4	SFRP2	-0.951022	0.000283039	NC_040046.1	96132613	96144344	+	NC_040049.1	31581867	31586221	+	--	secreted frizzled-related protein 2 [Anas platyrhynchos]	Environmental Information Processing	Signal transduction	ko04310//Wnt signaling pathway	K02176	GO:0005576//extracellular region;GO:0044421//extracellular region part	GO:0061134//peptidase regulator activity;GO:0005102//receptor binding;GO:0005515//protein binding;GO:0030234//enzyme regulator activity;GO:0098772//molecular function regulator;GO:0008047//enzyme activator activity;GO:0005488//binding;GO:0061135//endopeptidase regulator activity	GO:0009893//positive regulation of metabolic process;GO:0003208//cardiac ventricle morphogenesis;GO:0044700//single organism signaling;GO:0008285//negative regulation of cell proliferation;GO:0042221//response to chemical;GO:0044093//positive regulation of molecular function;GO:0001558//regulation of cell growth;GO:0010769//regulation of cell morphogenesis involved in differentiation;GO:0032268//…
XR_003500093.1	--	XM_005020961.4	SFRP2	-0.967299	8.53e-05	NC_040057.1	12378042	12386253	-	NC_040049.1	31581867	31586221	+	--	secreted frizzled-related protein 2 [Anas platyrhynchos]	Environmental Information Processing	Signal transduction	ko04310//Wnt signaling pathway	K02176	GO:0005576//extracellular region;GO:0044421//extracellular region part	GO:0061134//peptidase regulator activity;GO:0005102//receptor binding;GO:0005515//protein binding;GO:0030234//enzyme regulator activity;GO:0098772//molecular function regulator;GO:0008047//enzyme activator activity;GO:0005488//binding;GO:0061135//endopeptidase regulator activity	GO:0009893//positive regulation of metabolic process;GO:0003208//cardiac ventricle morphogenesis;GO:0044700//single organism signaling;GO:0008285//negative regulation of cell proliferation;GO:0042221//response to chemical;GO:0044093//positive regulation of molecular function;GO:0001558//regulation of cell growth;GO:0010769//regulation of cell morphogenesis involved in differentiation;GO:0032268//…
XR_003498034.1	--	XM_005022507.4	TWIST2	0.982809	1.25e-05	NC_040051.1	15601239	15630332	+	NC_040052.1	14934807	14970504	+	--	twist-related protein 2 [Gallus gallus]	Human Diseases	Cancers	ko05205//Proteoglycans in cancer	K09069	GO:0043226//organelle;GO:0044464//cell part;GO:0032991//macromolecular complex;GO:0043231//intracellular membrane-bounded organelle;GO:0043227//membrane-bounded organelle;GO:0043234//protein complex;GO:0005623//cell;GO:0005622//intracellular;GO:0044424//intracellular part;GO:0043229//intracellular organelle	GO:0000988//transcription factor activity, protein binding;GO:0097159//organic cyclic compound binding;GO:0003676//nucleic acid binding;GO:0000989//transcription factor activity, transcription factor binding;GO:1901363//heterocyclic compound binding;GO:0001071//nucleic acid binding transcription factor activity;GO:0005488//binding;GO:0005515//protein binding	GO:0060255//regulation of macromolecule metabolic process;GO:0051252//regulation of RNA metabolic process;GO:0009887//organ morphogenesis;GO:0007275//multicellular organism development;GO:0048568//embryonic organ development;GO:0043067//regulation of programmed cell death;GO:0009889//regulation of biosynthetic process;GO:0009653//anatomical structure morphogenesis;GO:0050793//regulation of develo…
XR_003501403.1	--	XM_005022507.4	TWIST2	0.95617	0.000203637	NC_040065.1	998135	1019116	-	NC_040052.1	14934807	14970504	+	--	twist-related protein 2 [Gallus gallus]	Human Diseases	Cancers	ko05205//Proteoglycans in cancer	K09069	GO:0043226//organelle;GO:0044464//cell part;GO:0032991//macromolecular complex;GO:0043231//intracellular membrane-bounded organelle;GO:0043227//membrane-bounded organelle;GO:0043234//protein complex;GO:0005623//cell;GO:0005622//intracellular;GO:0044424//intracellular part;GO:0043229//intracellular organelle	GO:0000988//transcription factor activity, protein binding;GO:0097159//organic cyclic compound binding;GO:0003676//nucleic acid binding;GO:0000989//transcription factor activity, transcription factor binding;GO:1901363//heterocyclic compound binding;GO:0001071//nucleic acid binding transcription factor activity;GO:0005488//binding;GO:0005515//protein binding	GO:0060255//regulation of macromolecule metabolic process;GO:0051252//regulation of RNA metabolic process;GO:0009887//organ morphogenesis;GO:0007275//multicellular organism development;GO:0048568//embryonic organ development;GO:0043067//regulation of programmed cell death;GO:0009889//regulation of biosynthetic process;GO:0009653//anatomical structure morphogenesis;GO:0050793//regulation of develo…
TCONS_00045460	--	XM_005023567.4	ADORA2A	0.966851	8.88e-05	NC_040056.1	4309249	4452911	+	NC_040061.1	6463222	6492721	-	--	PREDICTED: adenosine receptor A2a [Anas platyrhynchos]	Environmental Information Processing;Organismal Systems;Human Diseases	Signal transduction;Signaling molecules and interaction;Neurodegenerative diseases;Circulatory system;Substance dependence	ko04080//Neuroactive ligand-receptor interaction;ko04024//cAMP signaling pathway;ko04020//Calcium signaling pathway;ko04015//Rap1 signaling pathway;ko04270//Vascular smooth muscle contraction;ko05034//Alcoholism;ko05012//Parkinson disease	K04266	GO:0031224//intrinsic component of membrane;GO:0016020//membrane;GO:0044425//membrane part	GO:0004888//transmembrane signaling receptor activity;GO:0004872//receptor activity;GO:0038023//signaling receptor activity;GO:0004871//signal transducer activity;GO:0060089//molecular transducer activity;GO:0099600//transmembrane receptor activity	GO:0009719//response to endogenous stimulus;GO:0050804//modulation of synaptic transmission;GO:0050863//regulation of T cell activation;GO:0044700//single organism signaling;GO:0030804//positive regulation of cyclic nucleotide biosynthetic process;GO:0007166//cell surface receptor signaling pathway;GO:0050794//regulation of cellular process;GO:0046634//regulation of alpha-beta T cell activation;G…
XR_003492935.1	--	XM_005023567.4	ADORA2A	0.979358	2.17e-05	NC_040075.1	71153275	71158556	+	NC_040061.1	6463222	6492721	-	--	PREDICTED: adenosine receptor A2a [Anas platyrhynchos]	Environmental Information Processing;Organismal Systems;Human Diseases	Signal transduction;Signaling molecules and interaction;Neurodegenerative diseases;Circulatory system;Substance dependence	ko04080//Neuroactive ligand-receptor interaction;ko04024//cAMP signaling pathway;ko04020//Calcium signaling pathway;ko04015//Rap1 signaling pathway;ko04270//Vascular smooth muscle contraction;ko05034//Alcoholism;ko05012//Parkinson disease	K04266	GO:0031224//intrinsic component of membrane;GO:0016020//membrane;GO:0044425//membrane part	GO:0004888//transmembrane signaling receptor activity;GO:0004872//receptor activity;GO:0038023//signaling receptor activity;GO:0004871//signal transducer activity;GO:0060089//molecular transducer activity;GO:0099600//transmembrane receptor activity	GO:0009719//response to endogenous stimulus;GO:0050804//modulation of synaptic transmission;GO:0050863//regulation of T cell activation;GO:0044700//single organism signaling;GO:0030804//positive regulation of cyclic nucleotide biosynthetic process;GO:0007166//cell surface receptor signaling pathway;GO:0050794//regulation of cellular process;GO:0046634//regulation of alpha-beta T cell activation;G…
TCONS_00037080	--	XM_005023622.4	CP	0.974421	4.1e-05	NC_040052.1	5731164	5750984	-	NC_040054.1	48703	68470	-	--	PREDICTED: ceruloplasmin isoform X1 [Anas platyrhynchos]	Cellular Processes;Metabolism	Metabolism of cofactors and vitamins;Cell growth and death	ko04216//Ferroptosis;ko00860//Porphyrin and chlorophyll metabolism	K13624	GO:0044422//organelle part;GO:0098805//whole membrane;GO:0016020//membrane;GO:0043226//organelle;GO:0031982//vesicle;GO:0043227//membrane-bounded organelle;GO:0044424//intracellular part;GO:0043229//intracellular organelle;GO:0043231//intracellular membrane-bounded organelle;GO:0044464//cell part;GO:0031090//organelle membrane;GO:0005623//cell;GO:0044444//cytoplasmic part;GO:0005773//vacuole;GO:0…	GO:0046914//transition metal ion binding;GO:0005515//protein binding;GO:0043169//cation binding;GO:0043167//ion binding;GO:0003824//catalytic activity;GO:0046872//metal ion binding;GO:0005488//binding	GO:0006873//cellular ion homeostasis;GO:1902578//single-organism localization;GO:0055082//cellular chemical homeostasis;GO:0006810//transport;GO:0044765//single-organism transport;GO:0019725//cellular homeostasis;GO:0046916//cellular transition metal ion homeostasis;GO:0065007//biological regulation;GO:0000041//transition metal ion transport;GO:0044763//single-organism cellular process;GO:0008152…
XR_001192252.3	--	XM_005023622.4	CP	0.966254	9.37e-05	NC_040046.1	27989435	28007208	+	NC_040054.1	48703	68470	-	--	PREDICTED: ceruloplasmin isoform X1 [Anas platyrhynchos]	Cellular Processes;Metabolism	Metabolism of cofactors and vitamins;Cell growth and death	ko04216//Ferroptosis;ko00860//Porphyrin and chlorophyll metabolism	K13624	GO:0044422//organelle part;GO:0098805//whole membrane;GO:0016020//membrane;GO:0043226//organelle;GO:0031982//vesicle;GO:0043227//membrane-bounded organelle;GO:0044424//intracellular part;GO:0043229//intracellular organelle;GO:0043231//intracellular membrane-bounded organelle;GO:0044464//cell part;GO:0031090//organelle membrane;GO:0005623//cell;GO:0044444//cytoplasmic part;GO:0005773//vacuole;GO:0…	GO:0046914//transition metal ion binding;GO:0005515//protein binding;GO:0043169//cation binding;GO:0043167//ion binding;GO:0003824//catalytic activity;GO:0046872//metal ion binding;GO:0005488//binding	GO:0006873//cellular ion homeostasis;GO:1902578//single-organism localization;GO:0055082//cellular chemical homeostasis;GO:0006810//transport;GO:0044765//single-organism transport;GO:0019725//cellular homeostasis;GO:0046916//cellular transition metal ion homeostasis;GO:0065007//biological regulation;GO:0000041//transition metal ion transport;GO:0044763//single-organism cellular process;GO:0008152…
XR_003495124.1	--	XM_005023622.4	CP	0.970479	6.29e-05	NC_040047.1	1128448	1158233	+	NC_040054.1	48703	68470	-	--	PREDICTED: ceruloplasmin isoform X1 [Anas platyrhynchos]	Cellular Processes;Metabolism	Metabolism of cofactors and vitamins;Cell growth and death	ko04216//Ferroptosis;ko00860//Porphyrin and chlorophyll metabolism	K13624	GO:0044422//organelle part;GO:0098805//whole membrane;GO:0016020//membrane;GO:0043226//organelle;GO:0031982//vesicle;GO:0043227//membrane-bounded organelle;GO:0044424//intracellular part;GO:0043229//intracellular organelle;GO:0043231//intracellular membrane-bounded organelle;GO:0044464//cell part;GO:0031090//organelle membrane;GO:0005623//cell;GO:0044444//cytoplasmic part;GO:0005773//vacuole;GO:0…	GO:0046914//transition metal ion binding;GO:0005515//protein binding;GO:0043169//cation binding;GO:0043167//ion binding;GO:0003824//catalytic activity;GO:0046872//metal ion binding;GO:0005488//binding	GO:0006873//cellular ion homeostasis;GO:1902578//single-organism localization;GO:0055082//cellular chemical homeostasis;GO:0006810//transport;GO:0044765//single-organism transport;GO:0019725//cellular homeostasis;GO:0046916//cellular transition metal ion homeostasis;GO:0065007//biological regulation;GO:0000041//transition metal ion transport;GO:0044763//single-organism cellular process;GO:0008152…
XR_003497624.1	--	XM_005023622.4	CP	0.969382	7.01e-05	NC_040050.1	10827043	10838465	+	NC_040054.1	48703	68470	-	--	PREDICTED: ceruloplasmin isoform X1 [Anas platyrhynchos]	Cellular Processes;Metabolism	Metabolism of cofactors and vitamins;Cell growth and death	ko04216//Ferroptosis;ko00860//Porphyrin and chlorophyll metabolism	K13624	GO:0044422//organelle part;GO:0098805//whole membrane;GO:0016020//membrane;GO:0043226//organelle;GO:0031982//vesicle;GO:0043227//membrane-bounded organelle;GO:0044424//intracellular part;GO:0043229//intracellular organelle;GO:0043231//intracellular membrane-bounded organelle;GO:0044464//cell part;GO:0031090//organelle membrane;GO:0005623//cell;GO:0044444//cytoplasmic part;GO:0005773//vacuole;GO:0…	GO:0046914//transition metal ion binding;GO:0005515//protein binding;GO:0043169//cation binding;GO:0043167//ion binding;GO:0003824//catalytic activity;GO:0046872//metal ion binding;GO:0005488//binding	GO:0006873//cellular ion homeostasis;GO:1902578//single-organism localization;GO:0055082//cellular chemical homeostasis;GO:0006810//transport;GO:0044765//single-organism transport;GO:0019725//cellular homeostasis;GO:0046916//cellular transition metal ion homeostasis;GO:0065007//biological regulation;GO:0000041//transition metal ion transport;GO:0044763//single-organism cellular process;GO:0008152…
XR_002402406.2	--	XM_005023822.4	GPR141	-0.970859	6.05e-05	NC_040057.1	12393420	12406316	-	NC_040047.1	62379767	62396239	+	--	PREDICTED: probable G-protein coupled receptor 141 isoform X1 [Anas platyrhynchos]	-	-	-	-	GO:0016020//membrane;GO:0031224//intrinsic component of membrane;GO:0044425//membrane part	-	GO:0050794//regulation of cellular process;GO:0050789//regulation of biological process;GO:0007154//cell communication;GO:0051716//cellular response to stimulus;GO:0023052//signaling;GO:0009987//cellular process;GO:0007165//signal transduction;GO:0050896//response to stimulus;GO:0044700//single organism signaling;GO:0044699//single-organism process;GO:0065007//biological regulation;GO:0044763//si…
XR_003501341.1	--	XM_005023822.4	GPR141	-0.951099	0.000281734	NC_040065.1	10963382	10969873	-	NC_040047.1	62379767	62396239	+	--	PREDICTED: probable G-protein coupled receptor 141 isoform X1 [Anas platyrhynchos]	-	-	-	-	GO:0016020//membrane;GO:0031224//intrinsic component of membrane;GO:0044425//membrane part	-	GO:0050794//regulation of cellular process;GO:0050789//regulation of biological process;GO:0007154//cell communication;GO:0051716//cellular response to stimulus;GO:0023052//signaling;GO:0009987//cellular process;GO:0007165//signal transduction;GO:0050896//response to stimulus;GO:0044700//single organism signaling;GO:0044699//single-organism process;GO:0065007//biological regulation;GO:0044763//si…
TCONS_00000285	--	XM_005023844.4	GNG4	0.979016	2.27e-05	NC_040046.1	8404934	8425213	+	NC_040048.1	24452739	24465054	-	--	PREDICTED: guanine nucleotide-binding protein G(I)/G(S)/G(O) subunit gamma-4 [Anas platyrhynchos]	Environmental Information Processing;Organismal Systems;Human Diseases	Immune system;Substance dependence;Infectious diseases;Nervous system;Signal transduction;Environmental adaptation;Endocrine system;Cancers	ko05200//Pathways in cancer;ko04151//PI3K-Akt signaling pathway;ko04014//Ras signaling pathway;ko05163//Human cytomegalovirus infection;ko04728//Dopaminergic synapse;ko05167//Kaposi sarcoma-associated herpesvirus infection;ko04713//Circadian entrainment;ko04723//Retrograde endocannabinoid signaling;ko04724//Glutamatergic synapse;ko04725//Cholinergic synapse;ko04062//Chemokine signaling pathway;ko…	K04541	GO:0031988//membrane-bounded vesicle;GO:0031982//vesicle;GO:0043226//organelle;GO:0043234//protein complex;GO:0032991//macromolecular complex;GO:0043227//membrane-bounded organelle;GO:0016020//membrane	-	GO:0007154//cell communication;GO:0007165//signal transduction;GO:0023052//signaling;GO:0050896//response to stimulus;GO:0044763//single-organism cellular process;GO:0044700//single organism signaling;GO:0040008//regulation of growth;GO:0044699//single-organism process;GO:0050789//regulation of biological process;GO:0051716//cellular response to stimulus;GO:0009987//cellular process;GO:0007166//c…
TCONS_00014904	--	XM_005023844.4	GNG4	0.960271	0.000152137	NC_040047.1	49147767	49281700	-	NC_040048.1	24452739	24465054	-	--	PREDICTED: guanine nucleotide-binding protein G(I)/G(S)/G(O) subunit gamma-4 [Anas platyrhynchos]	Environmental Information Processing;Organismal Systems;Human Diseases	Immune system;Substance dependence;Infectious diseases;Nervous system;Signal transduction;Environmental adaptation;Endocrine system;Cancers	ko05200//Pathways in cancer;ko04151//PI3K-Akt signaling pathway;ko04014//Ras signaling pathway;ko05163//Human cytomegalovirus infection;ko04728//Dopaminergic synapse;ko05167//Kaposi sarcoma-associated herpesvirus infection;ko04713//Circadian entrainment;ko04723//Retrograde endocannabinoid signaling;ko04724//Glutamatergic synapse;ko04725//Cholinergic synapse;ko04062//Chemokine signaling pathway;ko…	K04541	GO:0031988//membrane-bounded vesicle;GO:0031982//vesicle;GO:0043226//organelle;GO:0043234//protein complex;GO:0032991//macromolecular complex;GO:0043227//membrane-bounded organelle;GO:0016020//membrane	-	GO:0007154//cell communication;GO:0007165//signal transduction;GO:0023052//signaling;GO:0050896//response to stimulus;GO:0044763//single-organism cellular process;GO:0044700//single organism signaling;GO:0040008//regulation of growth;GO:0044699//single-organism process;GO:0050789//regulation of biological process;GO:0051716//cellular response to stimulus;GO:0009987//cellular process;GO:0007166//c…
[truncated: 1,161 more rows]
