# Supplementary material for: Transcriptome Sequencing to Identify Important Genes and lncRNAs Regulating Abdominal Fat Deposition in Ducks
Source: Animals (Basel). 2022 May 13;12(10):1256. doi: 10.3390/ani12101256 (PMC9138122; doi:10.3390/ani12101256)
Supplement: Supplementary file 1 [file animals-12-01256-s001.zip › Supplementary Table S4.xls]

## Sheet: Differential mRNA GO analysis.
Table S4. Differential mRNA GO analysis.
Category	Term	Count	%	PValue	Genes	List Total	Pop Hits	Pop Total	Fold Enrichment	Bonferroni	Benjamini	FDR
GOTERM_BP_DIRECT	GO:0007165~signal transduction	40	7.72201	0.0710068	PTPRT, PHLPP1, RALB, DGKD, CAB39, PDE1C, SRC, RASL11A, ARHGAP1, RAPH1, VLDLR, LSP1, PTPRK, IQGAP1, FGF2, TTBK1, RPS6KA3, IMPA1, RPS6KC1, AKT3, KIF13B, PCNT, LYN, KSR1, ITPK1, ANK2, ANK3, TGFBR1, GREM1, TOM1L2, NR4A3, CREB1, TRAF3, TOLLIP, PDE3A, PECAM1, PLXNB1, PKIG, MET, FBN1	493	1204	19349	1.3039	1	1	0.998535
GOTERM_BP_DIRECT	GO:0007155~cell adhesion	32	6.17761	3.43114e-05	PTPRT, ITGB5, SRC, LAMA3, ITGB2, TNC, PTPRK, THBS2, NUAK1, PDZD2, NCAM1, IGFBP7, CDON, EPHA4, ENTPD1, MYBPC1, ITGA4, PCDHGC5, VCAN, OBSCN, COL5A1, SPECC1L, CDH11, CD9, ADAM9, TGFBI, CNTN4, IGSF9B, CD24, CD44, JCAD, ADA	493	551	19349	2.27934	0.0894807	0.0274234	0.0273732
GOTERM_BP_DIRECT	GO:0006468~protein phosphorylation	29	5.59846	0.000104952	BUB1B, TTBK1, NUAK1, ACVR1C, RSRC1, RPS6KC1, AKT3, PDK4, NEK1, SCYL2, MARK1, PSKH1, LYN, KSR1, IGFBP3, HIPK3, TGFBR1, MTOR, PTK2, ERN1, OBSCN, CREB1, TAOK3, CCNE1, STK17B, ALPK3, TNIK, ALPK1, TAF2	493	505	19349	2.25381	0.249295	0.0573246	0.0572197
GOTERM_BP_DIRECT	GO:0030154~cell differentiation	25	4.82625	0.0531638	THRB, SRC, ARHGEF28, FGF2, APOLD1, ACVR1C, KIAA1522, PPDPFL, THSD7A, GABPA, LYN, APAF1, EYA2, STRBP, NTRK3, NR1H3, ARNT, PTK2, PRRC2B, GADD45G, SMAD7, TWSG1, SFRP2, PPARA, ACSBG2	493	664	19349	1.47769	1	1	0.998535
GOTERM_BP_DIRECT	GO:0016477~cell migration	17	3.28185	0.000981587	ITGB5, USP33, LAMA3, ITGB2, WWC2, SHROOM2, PTPRK, TNFAIP1, IQGAP1, PTK2, COL5A1, ADAM9, PLXNB1, GPC5, CD24, MET, CD44	493	258	19349	2.58607	0.931643	0.297857	0.297312
GOTERM_BP_DIRECT	GO:0098609~cell-cell adhesion	13	2.50965	0.00365724	ITGA4, SRC, LAMA3, ITGB2, AQP4, CELSR3, OBSCN, CDH11, PECAM1, CD24, PDLIM5, CD44, CDON	493	191	19349	2.67129	0.999955	0.729998	0.728661
GOTERM_BP_DIRECT	GO:0018108~peptidyl-tyrosine phosphorylation	11	2.12355	0.00202813	LYN, EPHA4, SRC, NTRK3, NEK1, MET, HIPK3, PTK2, FGFR2, TTBK1, TTN	493	132	19349	3.27062	0.996099	0.503528	0.502607
GOTERM_BP_DIRECT	GO:0046777~protein autophosphorylation	11	2.12355	0.016471	ERN1, LYN, MAP3K3, EPHA4, TAOK3, SRC, STK17B, TNIK, PTK2, FGFR2, MTOR	493	179	19349	2.41186	1	1	0.998535
GOTERM_BP_DIRECT	GO:0006631~fatty acid metabolic process	6	1.1583	0.0823397	AASDH, FASN, EHHADH, NAAA, PPARA, ACSBG2	493	91	19349	2.58774	1	1	0.998535
GOTERM_BP_DIRECT	GO:0019915~lipid storage	6	1.1583	0.00036317	DGAT2, ACVR1C, CIDEA, PLIN3, APOA1, PNPLA2	493	25	19349	9.41939	0.6293	0.156148	0.155862
GOTERM_BP_DIRECT	GO:0006644~phospholipid metabolic process	5	0.965251	0.090873	WWTR1, PLA2G4B, PLA2G4A, LCAT, APOA1	493	67	19349	2.92892	1	1	0.998535
GOTERM_BP_DIRECT	GO:0008347~glial cell migration	3	0.579151	0.0206356	EPHA4, VCAN, CD9	493	9	19349	13.0825	1	1	0.998535
GOTERM_BP_DIRECT	GO:0034389~lipid particle organization	3	0.579151	0.0986731	CIDEA, PTGFRN, PNPLA2	493	21	19349	5.60678	1	1	0.998535
GOTERM_MF_DIRECT	GO:0004672~protein kinase activity	24	4.6332	0.000158609	MAP3K3, EPHA4, KSR1, SRC, BUB1B, HIPK3, TGFBR1, MTOR, PTK2, TTBK1, TTN, RPS6KA3, NUAK1, OBSCN, TAOK3, RPS6KC1, STK17B, AKT3, PDK4, NEK1, TNIK, MET, SCYL2, FGFR2	493	376	18770	2.43019	0.115816	0.0205135	0.0203284
GOTERM_MF_DIRECT	GO:0051219~phosphoprotein binding	5	0.965251	0.0155485	LYN, EPB41, SRC, THRAP3, MTOR	493	37	18770	5.145	0.999995	0.502736	0.498201
GOTERM_MF_DIRECT	GO:0005547~phosphatidylinositol-3,4,5-trisphosphate binding	4	0.772201	0.0867698	JPH2, OBSCN, IQGAP1, ADAP1	493	40	18770	3.8073	1	1	0.992258
GOTERM_MF_DIRECT	GO:0010314~phosphatidylinositol-5-phosphate binding	3	0.579151	0.0955523	JPH2, OBSCN, PLA2G4A	493	20	18770	5.71095	1	1	0.992258
GOTERM_MF_DIRECT	GO:0000825~inositol tetrakisphosphate 6-kinase activity	2	0.3861	0.0517384	IPMK, ITPK1	493	2	18770	38.073	1	1	0.992258
GOTERM_CC_DIRECT	GO:0098978~glutamatergic synapse	16	3.0888	0.0443531	LYN, PTPRT, EPHA4, CLSTN2, SRC, NTRK3, SLC1A2, SLC1A6, MTOR, CNKSR2, PLCB4, PPP3CC, ADORA2A, CDH11, DAG1, TNIK	507	366	20164	1.73863	1	0.618409	0.600668
GOTERM_CC_DIRECT	GO:0005912~adherens junction	13	2.50965	0.00112591	LYN, EPHA4, SYNM, SNAP23, SHROOM2, PTPRK, KLHL24, SMAD7, CDH20, CDH11, DAG1, PDLIM5, JCAD	507	168	20164	3.07753	0.422909	0.0610495	0.0592981
GOTERM_CC_DIRECT	GO:0043235~receptor complex	13	2.50965	0.00868537	EPHA4, ITGB5, NTRK3, ITGB2, GPR63, NR1H3, LIFR, VLDLR, PRLR, TGFBR1, ACVR1C, MET, FGFR2	507	216	20164	2.39364	0.985835	0.211923	0.205843
GOTERM_CC_DIRECT	GO:0015629~actin cytoskeleton	13	2.50965	0.0273756	AUTS2, FKBP15, MYO5A, MYO9B, SORBS2, LSP1, IQGAP1, KLHL20, ACTA2, ABLIM1, STK17B, SPECC1L, PDLIM5	507	254	20164	2.03553	0.999999	0.475425	0.461786
GOTERM_CC_DIRECT	GO:0030667~secretory granule membrane	8	1.5444	0.0136708	LGALS3, CA4, PECAM1, RAB27A, CPE, IQGAP1, CD44, ATP6V0A1	507	101	20164	3.15019	0.99879	0.298124	0.289572
