# Supplementary material for: Transcriptome Sequencing to Identify Important Genes and lncRNAs Regulating Abdominal Fat Deposition in Ducks
Source: Animals (Basel). 2022 May 13;12(10):1256. doi: 10.3390/ani12101256 (PMC9138122; doi:10.3390/ani12101256)
Supplement: Supplementary file 1 [file animals-12-01256-s001.zip › Supplementary Table S5.xls]

## Sheet: Differential mRNA KEGG analysis
Table S5. Differential mRNA KEGG analysis.
Category	Term	Count	%	PValue	Genes	List Total	Pop Hits	Pop Total	Fold Enrichment	Bonferroni	Benjamini	FDR
KEGG_PATHWAY	hsa04010:MAPK signaling pathway	18	3.4749	0.00298849	MAP3K3, RASGRF2, PLA2G4B, PLA2G4A, NFATC1, CACNA1C, FGF2, TGFBR1, NFKB1, GADD45G, RPS6KA3, CACNB4, PPP3CC, TAOK3, AKT3, PTPN5, MET, FGFR2	224	294	8112	2.2172	0.571304	0.545508	0.545508
KEGG_PATHWAY	hsa04151:PI3K-Akt signaling pathway	18	3.4749	0.0177189	PHLPP1, ITGB5, ITGA4, LAMA3, TNC, THBS2, FGF2, PRLR, MTOR, PTK2, NFKB1, CREB1, CCNE1, PPP2R2B, AKT3, PIK3AP1, MET, FGFR2	224	354	8112	1.8414	0.993651	0.545508	0.545508
KEGG_PATHWAY	hsa05417:Lipid and atherosclerosis	13	2.50965	0.015383	LYN, APAF1, SRC, APOA1, NFATC1, VLDLR, PTK2, NFKB1, ERN1, PLCB4, PPP3CC, TRAF3, AKT3	224	215	8112	2.1897	0.987565	0.545508	0.545508
KEGG_PATHWAY	hsa04020:Calcium signaling pathway	12	2.3166	0.0666987	PLCB4, PPP3CC, PDE1C, ADORA2A, NTRK3, AGTR1, CACNA1C, ADRA1B, PLCD3, FGF2, MET, FGFR2	224	240	8112	1.81071	1	0.545508	0.545508
KEGG_PATHWAY	hsa04921:Oxytocin signaling pathway	10	1.9305	0.025956	RGS2, CACNB4, PLCB4, PPP3CC, SRC, PLA2G4B, PLA2G4A, NFATC1, CACNA1C, MYL9	224	154	8112	2.35158	0.999414	0.545508	0.545508
KEGG_PATHWAY	hsa04218:Cellular senescence	10	1.9305	0.0279142	PPP3CC, CCNE1, IGFBP3, AKT3, NFATC1, HIPK3, NFKB1, TGFBR1, MTOR, GADD45G	224	156	8112	2.32143	0.999669	0.545508	0.545508
KEGG_PATHWAY	hsa04071:Sphingolipid signaling pathway	8	1.5444	0.0453708	ACER2, PLCB4, CERS6, SGMS1, PPP2R2B, AKT3, SGPP1, NFKB1	224	119	8112	2.43457	0.999998	0.545508	0.545508
KEGG_PATHWAY	hsa04070:Phosphatidylinositol signaling system	7	1.35135	0.0504695	MTMR1, PLCB4, DGKD, IMPA1, IPMK, ITPK1, PLCD3	224	97	8112	2.6134	1	0.545508	0.545508
KEGG_PATHWAY	hsa04370:VEGF signaling pathway	6	1.1583	0.0225699	PPP3CC, SRC, PLA2G4B, AKT3, PLA2G4A, PTK2	224	59	8112	3.68281	0.998436	0.545508	0.545508
KEGG_PATHWAY	hsa04022:cGMP-PKG signaling pathway	11	2.12355	0.0166832	RGS2, PLCB4, CREB1, PPP3CC, AKT3, PDE3A, AGTR1, NFATC1, CACNA1C, ADRA1B, MYL9	224	167	8112	2.38537	0.991445	0.545508	0.545508
KEGG_PATHWAY	hsa04724:Glutamatergic synapse	8	1.5444	0.0373139	PLCB4, PPP3CC, PLA2G4B, SLC1A2, PLA2G4A, CACNA1C, SLC1A6, GLUL	224	114	8112	2.54135	0.999979	0.545508	0.545508
KEGG_PATHWAY	hsa04935:Growth hormone synthesis, secretion and action	7	1.35135	0.109296	PLCB4, CREB1, IGFBP3, AKT3, CACNA1C, PTK2, MTOR	224	119	8112	2.13025	1	0.662799	0.662799
KEGG_PATHWAY	hsa04912:GnRH signaling pathway	6	1.1583	0.112542	MAP3K3, PLCB4, SRC, PLA2G4B, PLA2G4A, CACNA1C	224	93	8112	2.33641	1	0.662799	0.662799
KEGG_PATHWAY	hsa04920:Adipocytokine signaling pathway	5	0.965251	0.121279	AKT3, PPARA, ACSBG2, NFKB1, MTOR	224	69	8112	2.62422	1	0.662799	0.662799
KEGG_PATHWAY	hsa04514:Cell adhesion molecules	5	0.965251	0.589892	VCAN, ITGA4, ITGB2, PECAM1, NCAM1	224	149	8112	1.21524	1	1	1
KEGG_PATHWAY	hsa00600:Sphingolipid metabolism	4	0.772201	0.151177	ACER2, CERS6, SGMS1, SGPP1	224	49	8112	2.95627	1	0.692489	0.692489
KEGG_PATHWAY	hsa04979:Cholesterol metabolism	4	0.772201	0.157772	SOAT1, LCAT, APOA1, LIPA	224	50	8112	2.89714	1	0.700112	0.700112
KEGG_PATHWAY	hsa04664:Fc epsilon RI signaling pathway	4	0.772201	0.28731	LYN, PLA2G4B, AKT3, PLA2G4A	224	68	8112	2.13025	1	0.948792	0.948792
KEGG_PATHWAY	hsa04068:FoxO signaling pathway	4	0.772201	0.703703	AKT3, FBXO25, TGFBR1, GADD45G	224	131	8112	1.10578	1	1	1
KEGG_PATHWAY	hsa00564:Glycerophospholipid metabolism	4	0.772201	0.508295	DGKD, PLA2G4B, PLA2G4A, LCAT	224	98	8112	1.47813	1	1	1
