# Supplementary material for: Transcriptome Sequencing to Identify Important Genes and lncRNAs Regulating Abdominal Fat Deposition in Ducks
Source: Animals (Basel). 2022 May 13;12(10):1256. doi: 10.3390/ani12101256 (PMC9138122; doi:10.3390/ani12101256)
Supplement: Supplementary file 1 [file animals-12-01256-s001.zip › Supplementary Table S6.xls]

## Sheet: GO analysis of target genes.
Table S6. GO analysis of target genes.
Category	Term	Count	%	PValue	Genes	List Total	Pop Hits	Pop Total	Fold Enrichment	Bonferroni	Benjamini	FDR
GOTERM_BP_DIRECT	GO:0007165~signal transduction	46	9.18164	0.00290442	DGKD, PDE1C, TENM4, GRP, CHRM4, CHRNA7, RASL11A, RAPH1, VLDLR, TRH, PTPRK, IQGAP1, ARHGAP15, IQGAP2, IL2RG, FGF2, TTBK1, RPS6KA3, RACGAP1, IMPA1, ARHGAP40, TOM1, RHPN2, CD34, LYN, TLE3, STAT3, ANK2, ANK3, TGFBR1, GPR141, GREM1, TOM1L2, AFDN, ARHGAP32, NR4A3, CREB1, IL1RAPL2, PDE3A, PECAM1, PLXNB1, PKIG, IL17D, MET, NBL1, FBN1	473	1204	19349	1.56289	0.999706	0.68585	0.684868
GOTERM_BP_DIRECT	GO:0030154~cell differentiation	33	6.58683	0.000210735	SEMA5B, ADCYAP1R1, THRB, SPI1, DDX4, UHRF2, ARHGEF28, TWIST2, ZBTB1, CHRDL2, CPLX2, FGF2, COL19A1, APOLD1, ACVR1C, KIAA1522, MAP3K20, PPDPFL, THSD7A, SOX4, GABPA, LYN, APAF1, EYA2, SEMA6D, NR1H3, ARNT, PRRC2B, GADD45G, SMAD7, SFRP2, ACSBG2, RAI14	473	664	19349	2.03303	0.445272	0.117801	0.117632
GOTERM_BP_DIRECT	GO:0006468~protein phosphorylation	21	4.19162	0.0240024	LYN, IGFBP3, TESK2, MERTK, HIPK3, TGFBR1, TTBK1, BMP2, CREB1, ACVR1C, TAOK3, CCNE1, RSRC1, MAP3K20, PDK4, ALPK3, MAP3K8, TNIK, ALPK1, SCYL2, BRD4	473	505	19349	1.70108	1	1	0.998926
GOTERM_BP_DIRECT	GO:0007155~cell adhesion	21	4.19162	0.0519385	CX3CR1, AOC3, ENTPD1, ITGB5, ITGA4, LAMA3, ITGB2, PTPRK, PCDH12, COL19A1, AFDN, VCAN, PDZD2, THEMIS2, CDH11, CD9, SIRPA, CNTN4, CD34, MYH10, JCAD	473	551	19349	1.55907	1	1	0.998926
GOTERM_BP_DIRECT	GO:0030335~positive regulation of cell migration	14	2.79441	0.011119	LYN, SEMA5B, WNT5B, CSF1, SEMA6D, STAT3, TWIST2, TGFBR1, PREX1, BMP2, DDRGK1, PECAM1, SNAI2, GTSE1	473	258	19349	2.21976	1	0.914047	0.912739
GOTERM_BP_DIRECT	GO:0016477~cell migration	13	2.59481	0.025119	ITGB5, USP33, LAMA3, ITGB2, SHROOM2, PTPRK, TNFAIP1, IQGAP1, MERTK, SIRPA, PLXNB1, GPC5, MET	473	258	19349	2.0612	1	1	0.998926
GOTERM_BP_DIRECT	GO:0007179~transforming growth factor beta receptor signaling pathway	11	2.19561	0.000288461	SPI1, CREB1, ITGB5, ZFYVE9, STAT3, WFIKKN2, ARHGEF18, PTPRK, SKIL, TGFBR1, SMAD7	473	107	19349	4.20539	0.553651	0.134375	0.134183
GOTERM_BP_DIRECT	GO:0043410~positive regulation of MAPK cascade	10	1.99601	0.0162289	BMP2, CHRNA7, IGFBP3, DAB2IP, IQGAP1, FGFR3, FGF2, TGFBR1, FGFR2, JCAD	473	159	19349	2.57277	1	1	0.998926
GOTERM_BP_DIRECT	GO:0019915~lipid storage	5	0.998004	0.00294461	DGAT2, ACVR1C, PLIN3, APOA1, PNPLA2	473	25	19349	8.1814	0.999738	0.68585	0.684868
GOTERM_BP_DIRECT	GO:0036151~phosphatidylcholine acyl-chain remodeling	5	0.998004	0.00579613	PLA2G4B, PLA2G10, LPCAT1, PLA2G4A, NR1H3	473	30	19349	6.81783	1	0.736371	0.735318
GOTERM_BP_DIRECT	GO:0006865~amino acid transport	5	0.998004	0.0220037	SLC36A1, SLC6A6, SLC7A6, SLC25A29, MYC	473	44	19349	4.64852	1	1	0.998926
GOTERM_BP_DIRECT	GO:0006654~phosphatidic acid biosynthetic process	5	0.998004	0.0333421	DGKD, PLA2G4B, PLA2G10, LPCAT1, PLA2G4A	473	50	19349	4.0907	1	1	0.998926
GOTERM_BP_DIRECT	GO:0045600~positive regulation of fat cell differentiation	5	0.998004	0.0377522	BMP2, SFRP2, CREB1, ZBTB16, SNAI2	473	52	19349	3.93336	1	1	0.998926
GOTERM_BP_DIRECT	GO:0006644~phospholipid metabolic process	5	0.998004	0.0808789	PLA2G4B, PLA2G10, LPCAT1, PLA2G4A, APOA1	473	67	19349	3.05276	1	1	0.998926
GOTERM_BP_DIRECT	GO:0045444~fat cell differentiation	5	0.998004	0.0952525	TCF7L2, NR4A3, WNT5B, FAM120B, ADGRF5	473	71	19349	2.88077	1	1	0.998926
GOTERM_BP_DIRECT	GO:0036148~phosphatidylglycerol acyl-chain remodeling	4	0.798403	0.00896054	PLA2G4B, PLA2G10, LPCAT1, PLA2G4A	473	18	19349	9.09044	1	0.907101	0.905803
GOTERM_MF_DIRECT	GO:0003700~transcription factor activity, sequence-specific DNA binding	25	4.99002	0.00726972	CSRNP1, THRB, SPI1, MYRF, PRDM2, FOXO3, AFF3, ARNTL2, BACH2, MYC, HSF4, SOX4, GABPA, GTF2I, HES6, TCF7L2, ZBTB16, STAT3, ARNT, NFATC1, MITF, FOXN3, TBX3, RUNX2, CREB1	472	555	18770	1.7913	0.996036	0.502381	0.501055
GOTERM_MF_DIRECT	GO:0004672~protein kinase activity	15	2.99401	0.0942735	MAP3K3, TESK2, HIPK3, TGFBR1, TTBK1, RPS6KA3, SBK1, TAOK3, MAP3K20, PDK4, MAP3K8, TNIK, MET, SCYL2, FGFR2	472	376	18770	1.58645	1	1	0.998679
GOTERM_MF_DIRECT	GO:0050839~cell adhesion molecule binding	6	1.1976	0.0311262	AFDN, CXADR, TENM4, ITGA4, ITGB2, CPE	472	70	18770	3.4086	1	1	0.998679
GOTERM_MF_DIRECT	GO:0019903~protein phosphatase binding	6	1.1976	0.0817273	LGALS3, STAT3, HSF4, SIRPA, IQGAP1, MET	472	92	18770	2.5935	1	1	0.998679
GOTERM_MF_DIRECT	GO:1902936~phosphatidylinositol bisphosphate binding	4	0.798403	0.00222917	LAPTM4B, TTPA, ADAP1, KCNH1	472	11	18770	14.4607	0.815775	0.281618	0.280875
GOTERM_CC_DIRECT	GO:0005887~integral component of plasma membrane	50	9.98004	0.00968402	TENM4, CHRM4, RRH, PTPRK, SLC6A2, IYD, SIRPA, CD34, KCNH1, ENTPD1, SLC15A2, CXADR, SEMA6D, ABCC5, LIFR, OPRM1, SORCS2, SLC7A6, ADORA2A, SCNN1A, PECAM1, AGTR1, AGTR2, CD46, LCT, MET, CX3CR1, ADCYAP1R1, SGMS1, SLC20A2, CHRNA7, CACNA1C, PCDH12, SLC5A1, IL2RG, SLC1A6, PROKR1, FLRT2, HRH2, TSPAN4, ST14, MERTK, TSPAN15, SLC6A6, CD9, PLXNB2, PLXNB1, CLEC2D, FGFR3, FGFR2	486	1447	20164	1.43365	0.986709	0.214985	0.209659
GOTERM_CC_DIRECT	GO:0043235~receptor complex	15	2.99401	0.00078788	ADCYAP1R1, ITGB5, ITGB2, GPR63, IL31RA, NR1H3, LIFR, VLDLR, IL2RG, MERTK, TGFBR1, ACVR1C, MET, FGFR3, FGFR2	486	216	20164	2.88123	0.295281	0.0474329	0.0462578
GOTERM_CC_DIRECT	GO:0005912~adherens junction	12	2.39521	0.00254861	LYN, AFDN, CXADR, CDH20, CDH11, SHROOM2, DAG1, KLHL24, PTPRK, PDLIM5, JCAD, SMAD7	486	168	20164	2.96355	0.677943	0.0942986	0.0919624
