# Supplementary material for: Transcriptome Sequencing to Identify Important Genes and lncRNAs Regulating Abdominal Fat Deposition in Ducks
Source: Animals (Basel). 2022 May 13;12(10):1256. doi: 10.3390/ani12101256 (PMC9138122; doi:10.3390/ani12101256)
Supplement: Supplementary file 1 [file animals-12-01256-s001.zip › Supplementary Table S7.xls]

## Sheet: KEGG analysis of target genes.
Table S7. KEGG analysis of target genes.
Category	Term	Count	%	PValue	Genes	List Total	Pop Hits	Pop Total	Fold Enrichment	Bonferroni	Benjamini	FDR
KEGG_PATHWAY	hsa04010:MAPK signaling pathway	20	3.99202	0.000621207	MAP3K3, CSF1, RASGRF2, PLA2G4B, PLA2G4A, NFATC1, CACNA1C, FGF2, TGFBR1, GADD45G, RPS6KA3, PPP3CC, TAOK3, MYC, MAP3K20, MAP3K8, PTPN5, MET, FGFR3, FGFR2	230	294	8112	2.39929	0.160218	0.17518	0.173938
KEGG_PATHWAY	hsa04390:Hippo signaling pathway	12	2.39521	0.00479655	TCF7L2, PARD6B, BMP2, PATJ, WNT5B, PPP2R2B, MYC, ITGB2, DVL3, SNAI2, TGFBR1, SMAD7	230	157	8112	2.69576	0.741038	0.278203	0.27623
KEGG_PATHWAY	hsa04350:TGF-beta signaling pathway	9	1.79641	0.00493269	GREM1, BMP2, ACVR1C, ZFYVE9, MYC, NBL1, TGFBR1, FBN1, SMAD7	230	94	8112	3.37687	0.750804	0.278203	0.27623
KEGG_PATHWAY	hsa04550:Signaling pathways regulating pluripotency of stem cells	11	2.19561	0.00712991	ACVR1C, WNT5B, MYC, STAT3, DVL3, LIFR, SKIL, FGFR3, FGF2, FGFR2, TBX3	230	143	8112	2.71304	0.866103	0.335106	0.332729
KEGG_PATHWAY	hsa00240:Pyrimidine metabolism	6	1.1976	0.021846	ENTPD1, ENTPD3, DPYD, ENPP3, NT5C2, UCKL1	230	57	8112	3.71259	0.997984	0.684509	0.679654
KEGG_PATHWAY	hsa04151:PI3K-Akt signaling pathway	17	3.39321	0.042358	ITGB5, CSF1, ITGA4, LAMA3, FOXO3, IL2RG, FGF2, CREB1, GNG4, CCNE1, PPP2R2B, MYC, DDIT4, PIK3AP1, MET, FGFR3, FGFR2	230	354	8112	1.69374	0.999995	0.986864	0.979865
KEGG_PATHWAY	hsa04520:Adherens junction	6	1.1976	0.049672	TCF7L2, AFDN, SNAI2, IQGAP1, MET, TGFBR1	230	71	8112	2.98053	0.999999	0.98907	0.982055
KEGG_PATHWAY	hsa04218:Cellular senescence	9	1.79641	0.0740274	PPP3CC, CCNE1, MYC, IGFBP3, NFATC1, FOXO3, HIPK3, TGFBR1, GADD45G	230	156	8112	2.03478	1	0.98907	0.982055
KEGG_PATHWAY	hsa04020:Calcium signaling pathway	12	2.39521	0.0773109	PLCB4, PPP3CC, PDE1C, ADORA2A, HRH2, CHRNA7, AGTR1, CACNA1C, FGFR3, FGF2, MET, FGFR2	230	240	8112	1.76348	1	0.98907	0.982055
KEGG_PATHWAY	hsa04270:Vascular smooth muscle contraction	8	1.59681	0.0846319	PLCB4, ADORA2A, PLA2G4B, PLA2G10, AGTR1, PLA2G4A, CACNA1C, MYH10	230	134	8112	2.10565	1	0.98907	0.982055
KEGG_PATHWAY	hsa04310:Wnt signaling pathway	9	1.79641	0.100064	TLE3, TCF7L2, PLCB4, SFRP2, PPP3CC, WNT5B, MYC, DVL3, NFATC1	230	167	8112	1.90076	1	0.98907	0.982055
KEGG_PATHWAY	hsa00564:Glycerophospholipid metabolism	6	1.1976	0.143229	PCYT1B, DGKD, PLA2G4B, PLA2G10, LPCAT1, PLA2G4A	230	98	8112	2.15936	1	1	0.996441
KEGG_PATHWAY	hsa00592:alpha-Linolenic acid metabolism	3	0.598802	0.156117	PLA2G4B, PLA2G10, PLA2G4A	230	25	8112	4.23235	1	1	0.996441
KEGG_PATHWAY	hsa00565:Ether lipid metabolism	4	0.798403	0.159844	PLA2G4B, PLA2G10, LPCAT1, PLA2G4A	230	49	8112	2.87915	1	1	0.996441
KEGG_PATHWAY	hsa00591:Linoleic acid metabolism	3	0.598802	0.19682	PLA2G4B, PLA2G10, PLA2G4A	230	29	8112	3.64858	1	1	0.996441
KEGG_PATHWAY	hsa04912:GnRH signaling pathway	5	0.998004	0.267815	MAP3K3, PLCB4, PLA2G4B, PLA2G4A, CACNA1C	230	93	8112	1.89621	1	1	0.996441
KEGG_PATHWAY	hsa04921:Oxytocin signaling pathway	7	1.39721	0.26854	RGS2, PLCB4, PPP3CC, PLA2G4B, PLA2G4A, NFATC1, CACNA1C	230	154	8112	1.60316	1	1	0.996441
KEGG_PATHWAY	hsa00600:Sphingolipid metabolism	3	0.598802	0.404651	ACER2, CERS6, SGMS1	230	49	8112	2.15936	1	1	0.996441
KEGG_PATHWAY	hsa04935:Growth hormone synthesis, secretion and action	5	0.998004	0.434402	PLCB4, CREB1, IGFBP3, STAT3, CACNA1C	230	119	8112	1.48191	1	1	0.996441
KEGG_PATHWAY	hsa04071:Sphingolipid signaling pathway	5	0.998004	0.434402	ACER2, PLCB4, CERS6, SGMS1, PPP2R2B	230	119	8112	1.48191	1	1	0.996441
