# Supplementary material for: Transcriptome Sequencing to Identify Important Genes and lncRNAs Regulating Abdominal Fat Deposition in Ducks
Source: Animals (Basel). 2022 May 13;12(10):1256. doi: 10.3390/ani12101256 (PMC9138122; doi:10.3390/ani12101256)
Supplement: Supplementary file 1 [file animals-12-01256-s001.zip › Supplementary table S8.xls]

## Sheet: Analysis results of qRT-PCR.
Table S8. Analysis results of qRT-PCR.
Gene/lncRNA	F Value	P Value
SCD1	889.416	<0.001
FASN	108.119	<0.001
FAM89A	20.387	0.02
FGF2	283.545	<0.001
XR_003495255.1	78.186	<0.001
XR_001191758.3	237.528	<0.001
XR_003497816.1	5.2	0.072
XR_003500147.1	22.18	0.005
